# Supplementary material for: Coordinated regulation of pH alkalinization by two transcription factors promotes fungal commensalism and pathogenicity
Source: Nat Commun. 2025 Aug 22;16:7855. doi: 10.1038/s41467-025-62953-x (PMC12373999; doi:10.1038/s41467-025-62953-x)
Supplement: Supplementary file 3 — Supplementary Data 1 [file 41467_2025_62953_MOESM3_ESM.xlsx]

## Sheet: SC5314 DEGs_SD_vs_YC
geneID	baseMean	log2FoldChange	lfcSE	stat	pvalue	padj	level	symbol	vs_Dal81	vs_Stp2
C7_03570W_A	1427.22	-13.9981	1.18976	-11.7654	5.8836e-32	4.02404e-31	depleted	ARG4	Dal81-independent	Stp2-independent
C7_00400W_A	2089.15	-13.5859	1.18441	-11.4706	1.85296e-30	1.22141e-29	depleted	LEU2	Dal81-independent	Stp2-independent
CR_01030W_A	120.216	-10.4289	1.20051	-8.68702	3.72062e-18	1.55155e-17	depleted	DAL81	Dal81-dependent	Stp2-dependent
C5_05320C_A	4160.36	-10.1001	0.316803	-31.8814	4.82877e-223	1.70569e-220	depleted	HIS1	Dal81-dependent	Stp2-dependent
CR_10100C_A	3400.33	-9.8985	0.692659	-14.2906	2.50522e-46	2.59376e-45	depleted	INO1	Dal81-dependent	Stp2-dependent
CR_01920W_A	607.999	-8.73508	0.514376	-16.9819	1.11842e-64	1.84002e-63	depleted	CAWG_01545	Dal81-independent	Stp2-independent
C3_03350W_A	70.6045	-8.69538	1.21103	-7.18017	6.96232e-13	2.23696e-12	depleted	tE(UUC)1	Dal81-dependent	Stp2-dependent
C6_01990W_A	620.343	-7.68932	0.371244	-20.7123	2.68232e-95	9.2042e-94	depleted	PLB1	Dal81-dependent	Stp2-independent
CM_00410W	17.1401	-7.61957	1.34404	-5.66917	1.43492e-08	3.56356e-08	depleted	tS(GCU)3mt	Dal81-independent	Stp2-independent
CM_00420W	14.2866	-7.35604	1.3071	-5.62776	1.8257e-08	4.50381e-08	depleted	tS(UGA)4mt	Dal81-independent	Stp2-independent
CM_00160C	10.6154	-6.92989	1.436	-4.82581	1.39432e-06	2.96806e-06	depleted	ATP6	Dal81-independent	Stp2-independent
CM_00240W	16.7455	-6.6121	1.30115	-5.08172	3.74028e-07	8.3776e-07	depleted	CaalfMp08.3	Dal81-independent	Stp2-independent
CM_00430W	7.69041	-6.46188	1.42879	-4.52262	6.10801e-06	1.23622e-05	depleted	tL(UAG)1mt	Dal81-independent	Stp2-independent
CM_00440W	64.2562	-6.33245	0.731329	-8.65883	4.76637e-18	1.98077e-17	depleted	NAD4	Dal81-dependent	Stp2-dependent
CM_00220W	7.00449	-6.32665	1.4304	-4.423	9.73405e-06	1.93874e-05	depleted	CaalfMp08.1	Dal81-dependent	Stp2-independent
C3_05580C_A	237.972	-6.23914	0.724446	-8.61229	7.16164e-18	2.94357e-17	depleted	GAP2	Dal81-independent	Stp2-dependent
CR_01910C_A	477.883	-6.16159	0.29363	-20.9842	9.14828e-98	3.32942e-96	depleted	CAWG_01546	Dal81-independent	Stp2-independent
C3_01540W_A	6634.04	-5.92605	0.153195	-38.683	0	0	depleted	CAWG_02486	Dal81-dependent	Stp2-dependent
C4_00990W_A	689.287	-5.7604	0.217626	-26.4692	2.19428e-154	2.27183e-152	depleted	CAWG_03681	Dal81-dependent	Stp2-dependent
CR_03270W_A	3066.42	-5.57585	0.18096	-30.8127	1.77171e-208	4.83598e-206	depleted	CAWG_01662	Dal81-dependent	Stp2-dependent
CR_01930C_A	2751.72	-5.53735	0.1653	-33.4987	5.03317e-246	2.15887e-243	depleted	BIO2	Dal81-dependent	Stp2-dependent
C2_05900W_A	11.2806	-5.12165	1.22712	-4.17373	2.99657e-05	5.70346e-05	depleted	CAWG_04334	Dal81-dependent	Stp2-dependent
C4_03950C_A	325.04	-4.93703	0.262018	-18.8423	3.39745e-79	7.9384e-78	depleted	orf19.787	Dal81-dependent	Stp2-dependent
C1_00170W_A	5736.21	-4.90505	0.188598	-26.008	4.02386e-149	3.71743e-147	depleted	LEU4	Dal81-dependent	Stp2-dependent
C2_07570W_A	8648.55	-4.87527	0.131375	-37.1095	1.97586e-301	1.1865e-298	depleted	RNR22	Dal81-independent	Stp2-dependent
C6_01510W_A	38.3493	-4.86503	0.6276	-7.75181	9.05924e-15	3.22089e-14	depleted	OYE23	Dal81-dependent	Stp2-dependent
C2_02950W_A	1023.63	-4.83492	0.166334	-29.0675	9.2558e-186	1.46266e-183	depleted	BNA31	Dal81-independent	Stp2-independent
C4_00430W_A	3445.52	-4.81441	0.229452	-20.9822	9.5345e-98	3.44908e-96	depleted	MEP2	Dal81-independent	Stp2-independent
C2_05460W_A	103119	-4.79334	0.099097	-48.3702	0	0	depleted	CDC19	Dal81-independent	Stp2-independent
CR_09350C_A	8.99486	-4.77033	1.23208	-3.87176	0.000108053	0.000195263	depleted	CAWG_02205	Dal81-dependent	Stp2-independent
C2_02640C_A	156.918	-4.68956	0.319148	-14.694	7.04033e-49	7.80021e-48	depleted	BNA32	Dal81-independent	Stp2-independent
C3_04060C_A	11681.9	-4.63566	0.110055	-42.1212	0	0	depleted	HEM13	Dal81-dependent	Stp2-dependent
CR_00790C_A	7.78062	-4.55427	1.29053	-3.52898	0.000417168	0.000710867	depleted	CAWG_01437	Dal81-dependent	Stp2-dependent
C2_04340C_A	88.0257	-4.53277	0.390572	-11.6055	3.86603e-31	2.58813e-30	depleted	CAWG_04190	Dal81-independent	Stp2-dependent
C2_05870W_A	1126.5	-4.4931	0.150717	-29.8115	2.77026e-195	5.54513e-193	depleted	orf19.5210.1	Dal81-independent	Stp2-independent
C4_03500C_A	14.9513	-4.47971	0.968802	-4.62397	3.76462e-06	7.76324e-06	depleted	CAWG_03458	Dal81-dependent	Stp2-dependent
C2_07140W_A	1926.11	-4.45627	0.136508	-32.6448	9.51104e-234	3.56961e-231	depleted	CAWG_05811	Dal81-independent	Stp2-independent
C1_02540C_A	28.7553	-4.44887	0.67841	-6.55779	5.46102e-11	1.57509e-10	depleted	tR(UCU)4	Dal81-dependent	Stp2-dependent
C4_01750C_A	108315	-4.42777	0.110903	-39.9248	0	0	depleted	FBA1	Dal81-dependent	Stp2-dependent
C4_03960W_A	1953.73	-4.38789	0.159908	-27.4401	9.12911e-166	1.19175e-163	depleted	orf19.787.1	Dal81-dependent	Stp2-dependent
C2_03270W_A	71757.6	-4.3232	0.103034	-41.9588	0	0	depleted	GPM1	Dal81-dependent	Stp2-independent
C2_06590C_A	147.251	-4.30566	0.299405	-14.3807	6.84042e-47	7.13137e-46	depleted	GIT1	Dal81-dependent	Stp2-dependent
C1_05830W_A	38.859	-4.30389	0.592443	-7.26465	3.74017e-13	1.22196e-12	depleted	CAWG_00824	Dal81-dependent	Stp2-independent
C1_06870C_A	316.97	-4.28582	0.252705	-16.9598	1.63001e-64	2.65264e-63	depleted	orf19.6222.1	Dal81-dependent	Stp2-independent
C6_02550W_A	9.16732	-4.20127	1.07776	-3.89814	9.6933e-05	0.000175697	depleted	CAWG_05113	Dal81-independent	Stp2-dependent
C6_00940C_A	163.08	-4.18305	0.275053	-15.2081	3.12245e-52	3.81104e-51	depleted	CAWG_05265	Dal81-independent	Stp2-dependent
CR_08310C_A	74.3073	-4.14571	0.45665	-9.07853	1.10052e-19	4.9392e-19	depleted	CAWG_02119	Dal81-independent	Stp2-dependent
C1_04650W_A	266.222	-4.13403	0.696481	-5.9356	2.92776e-09	7.60763e-09	depleted	DUR3	Dal81-dependent	Stp2-dependent
C4_05780C_A	137.097	-4.12343	0.328406	-12.5559	3.6898e-36	2.8334e-35	depleted	CFL2	Dal81-independent	Stp2-dependent
C2_03120W_A	5090.23	-4.0885	0.178828	-22.8627	1.09191e-115	5.33085e-114	depleted	AMO1	Dal81-dependent	Stp2-dependent
C3_07450C_A	3876.94	-3.96168	0.134962	-29.3541	2.12011e-189	3.53646e-187	depleted	CAWG_03054	Dal81-independent	Stp2-independent
C2_06560W_A	496.544	-3.94402	0.220071	-17.9216	7.99963e-72	1.59066e-70	depleted	snR8b	Dal81-dependent	Stp2-independent
C1_07230W_A	2290.97	-3.93745	0.148152	-26.577	1.25073e-155	1.39086e-153	depleted	PHO15	Dal81-dependent	Stp2-dependent
C4_00450C_A	301.933	-3.88745	0.268572	-14.4745	1.75487e-47	1.84877e-46	depleted	PGA10	Dal81-independent	Stp2-independent
C3_04270C_A	2061.67	-3.88652	0.141993	-27.3713	6.02801e-165	7.54129e-163	depleted	CTP1	Dal81-dependent	Stp2-dependent
C4_00190W_A	1242.02	-3.87905	0.152852	-25.3778	4.43338e-142	3.74964e-140	depleted	CAWG_03764	Dal81-independent	Stp2-independent
CR_04210C_A	2227.99	-3.79996	0.659549	-5.76145	8.33923e-09	2.09967e-08	depleted	QDR1	Dal81-dependent	Stp2-dependent
C5_01380W_A	41.0067	-3.7456	1.1801	-3.17396	0.00150373	0.0024054	depleted	CFL5	Dal81-independent	Stp2-dependent
C3_07360W_A	1061.95	-3.736	0.149491	-24.9916	7.54788e-138	6.04333e-136	depleted	DLD2	Dal81-independent	Stp2-independent
CR_09430C_A	13.5055	-3.72973	0.830671	-4.49002	7.12165e-06	1.43364e-05	depleted	CAWG_02212	Dal81-dependent	Stp2-dependent
CM_00060W	6.5146	-3.71541	1.19828	-3.10062	0.00193113	0.0030533	depleted	NAD1	Dal81-independent	Stp2-independent
CR_01400W_A	11876.6	-3.71427	0.118872	-31.2459	2.53937e-214	7.62445e-212	depleted	LYS12	Dal81-dependent	Stp2-dependent
C3_05590C_A	10822.4	-3.71248	0.137621	-26.9761	2.81633e-160	3.25232e-158	depleted	BAT22	Dal81-dependent	Stp2-dependent
C1_03750W_A	518.834	-3.66516	0.178742	-20.5053	1.93078e-93	6.2672e-92	depleted	CAWG_01016	Dal81-independent	Stp2-independent
C3_06870W_A	282572	-3.64889	0.110985	-32.8772	4.65346e-237	1.86293e-234	depleted	TDH3	Dal81-dependent	Stp2-dependent
C3_02950C_A	3523.29	-3.63209	0.157311	-23.0886	6.02734e-118	3.17493e-116	depleted	MET13	Dal81-independent	Stp2-independent
C2_05890C_A	6400.95	-3.6251	0.118507	-30.5896	1.68221e-205	4.39202e-203	depleted	IDP1	Dal81-dependent	Stp2-dependent
C3_05600W_A	246.908	-3.61109	0.255511	-14.1328	2.38416e-45	2.37822e-44	depleted	ATO6	Dal81-dependent	Stp2-dependent
C4_00200C_A	7100.48	-3.60088	0.126997	-28.354	7.46217e-177	1.0421e-174	depleted	MET15	Dal81-dependent	Stp2-dependent
C1_08500C_A	170414	-3.58629	0.105524	-33.9855	3.65164e-253	1.68678e-250	depleted	ENO1	Dal81-dependent	Stp2-independent
C3_07440W_A	33045.6	-3.57656	0.103227	-34.6476	4.85718e-263	2.43061e-260	depleted	TPI1	Dal81-dependent	Stp2-dependent
C2_04230W_A	4637.72	-3.55673	0.124751	-28.5105	8.66987e-179	1.23958e-176	depleted	BAT21	Dal81-dependent	Stp2-dependent
C2_00340C_A	8488.41	-3.54453	0.112747	-31.438	6.12674e-217	2.04395e-214	depleted	ARO8	Dal81-independent	Stp2-independent
C7_02600C_A	4533.16	-3.53533	0.140926	-25.0865	6.98597e-139	5.66902e-137	depleted	orf19.2372	Dal81-independent	Stp2-independent
C4_06570C_A	138726	-3.53497	0.152617	-23.1624	1.09142e-118	5.9045e-117	depleted	PDC11	Dal81-dependent	Stp2-independent
C6_00750C_A	86228.7	-3.50571	0.115637	-30.3163	6.98148e-202	1.67695e-199	depleted	PGK1	Dal81-dependent	Stp2-independent
C4_00440C_A	548.162	-3.46254	0.177437	-19.5141	8.32667e-85	2.13682e-83	depleted	OPT7	Dal81-independent	Stp2-dependent
C1_02980W_A	2179.85	-3.44348	0.148359	-23.2104	3.57208e-119	1.98614e-117	depleted	GOR1	Dal81-independent	Stp2-dependent
C2_05060C_A	147.194	-3.43108	0.285096	-12.0348	2.3312e-33	1.65081e-32	depleted	CAWG_04258	Dal81-independent	Stp2-independent
CR_09010C_A	5030.75	-3.42136	0.116071	-29.4765	5.7592e-191	1.01718e-188	depleted	CAWG_02177	Dal81-dependent	Stp2-independent
C2_08400C_A	10.9051	-3.41866	0.893174	-3.82754	0.000129428	0.00023249	depleted	CAWG_01505	Dal81-dependent	Stp2-dependent
CR_10570C_A	1246.92	-3.41796	0.153043	-22.3333	1.75345e-110	8.03778e-109	depleted	YHB4	Dal81-dependent	Stp2-dependent
C4_06120W_A	13892.7	-3.39669	0.164512	-20.6471	1.03738e-94	3.4417e-93	depleted	GDH3	Dal81-dependent	Stp2-dependent
C4_05390W_A	934.556	-3.38492	0.144224	-23.4699	8.29025e-122	4.88068e-120	depleted	CAWG_03276	Dal81-dependent	Stp2-dependent
C4_01690C_A	2025.62	-3.37255	0.138398	-24.3686	3.68676e-131	2.60459e-129	depleted	HRT2	Dal81-dependent	Stp2-dependent
C2_06570C_A	5242.1	-3.35772	0.13692	-24.5232	8.35416e-133	5.97223e-131	depleted	orf19.33	Dal81-dependent	Stp2-independent
C2_02610C_A	118.309	-3.32033	0.280582	-11.8338	2.61193e-32	1.79664e-31	depleted	HGT20	Dal81-dependent	Stp2-dependent
C6_03320W_A	7468.27	-3.30451	0.124501	-26.542	3.17721e-155	3.40699e-153	depleted	CAWG_05038	Dal81-dependent	Stp2-dependent
C4_01800W_A	367.015	-3.28956	0.217768	-15.1058	1.48245e-51	1.78399e-50	depleted	CAWG_03614	Dal81-dependent	Stp2-independent
CR_04970C_A	6.76921	-3.25981	1.15124	-2.83157	0.00463207	0.00703657	depleted	CAWG_01831	Dal81-dependent	Stp2-dependent
CR_04510W_A	21579.8	-3.23089	0.113088	-28.5697	1.59875e-179	2.34158e-177	depleted	HXK2	Dal81-independent	Stp2-independent
C2_01250W_A	401.785	-3.20575	0.177905	-18.0195	1.37064e-72	2.8091e-71	depleted	CAWG_03900	Dal81-independent	Stp2-independent
C1_04660W_A	2275.45	-3.17557	0.226822	-14.0002	1.55329e-44	1.51667e-43	depleted	DUR1,2	Dal81-dependent	Stp2-dependent
C2_10560C_A	2289.56	-3.17513	0.115819	-27.4145	1.84429e-165	2.35638e-163	depleted	ZSF1	Dal81-independent	Stp2-independent
C2_07180W_A	31.6484	-3.17066	0.50075	-6.33182	2.42293e-10	6.7736e-10	depleted	CAWG_05814	Dal81-dependent	Stp2-dependent
C6_02210W_A	123.974	-3.16087	0.28816	-10.9692	5.37745e-28	3.29843e-27	depleted	CAWG_05146	Dal81-independent	Stp2-independent
C4_01370W_A	4525.93	-3.13744	0.138748	-22.6125	3.26794e-113	1.56992e-111	depleted	ILV6	Dal81-independent	Stp2-independent
C6_03280W_A	13.7354	-3.11685	0.809879	-3.84853	0.000118828	0.000214025	depleted	CAWG_05042	Dal81-independent	Stp2-dependent
C6_03330C_A	4244.59	-3.07083	0.129475	-23.7175	2.3771e-124	1.4716e-122	depleted	CAWG_05037	Dal81-independent	Stp2-independent
C4_01760W_A	794.332	-3.06558	0.186802	-16.4108	1.59952e-60	2.43168e-59	depleted	CAWG_03618	Dal81-independent	Stp2-independent
C3_06920W_A	1727.22	-3.05142	0.124202	-24.5683	2.75997e-133	1.99682e-131	depleted	CAWG_03002	Dal81-independent	Stp2-independent
CR_03510W_A	243.771	-3.0468	0.197839	-15.4004	1.62655e-53	2.07818e-52	depleted	CAWG_01686	Dal81-dependent	Stp2-independent
C3_02300W_A	304.565	-3.02548	0.204251	-14.8125	1.21548e-49	1.385e-48	depleted	FGR23	Dal81-independent	Stp2-independent
C1_01330C_A	445.683	-3.02544	0.168516	-17.9534	4.5133e-72	9.09476e-71	depleted	DUT1	Dal81-independent	Stp2-dependent
CR_06800C_A	5650.63	-3.00934	0.111011	-27.1084	7.83135e-162	9.22104e-160	depleted	HHF22	Dal81-independent	Stp2-independent
C1_02600W_A	805.69	-3.00829	0.138757	-21.6803	3.15039e-104	1.26121e-102	depleted	SNO1	Dal81-independent	Stp2-independent
C1_08410C_A	4288.21	-2.99203	0.135498	-22.0816	4.74545e-108	2.06496e-106	depleted	SAM4	Dal81-dependent	Stp2-dependent
C1_02620C_A	5473.23	-2.99166	0.112597	-26.5696	1.52345e-155	1.66333e-153	depleted	HOM6	Dal81-dependent	Stp2-dependent
C1_02970W_A	5763.25	-2.98994	0.128998	-23.1783	7.54099e-119	4.15446e-117	depleted	CAWG_01087	Dal81-dependent	Stp2-dependent
CR_10580W_A	2713.55	-2.97842	0.115292	-25.8337	3.71335e-147	3.23169e-145	depleted	PRO1	Dal81-independent	Stp2-independent
CR_10840C_A	10537.2	-2.97793	0.145725	-20.4353	8.11596e-93	2.56507e-91	depleted	XYL2	Dal81-dependent	Stp2-dependent
C3_06880W_A	87.9995	-2.96633	0.332689	-8.91624	4.82368e-19	2.1097e-18	depleted	orf19.6813	Dal81-independent	Stp2-independent
C3_06490W_A	874.87	-2.95679	0.172092	-17.1814	3.65749e-66	6.31126e-65	depleted	CAWG_02959	Dal81-dependent	Stp2-dependent
C1_08430W_A	1117.87	-2.95319	0.14695	-20.0965	7.91885e-90	2.28619e-88	depleted	CAF16	Dal81-independent	Stp2-independent
CR_06340C_A	20138.3	-2.94346	0.116812	-25.1983	4.18535e-140	3.4907e-138	depleted	PGI1	Dal81-independent	Stp2-independent
CR_02570C_A	2319.25	-2.92455	0.157939	-18.5169	1.50921e-76	3.31971e-75	depleted	orf19.164	Dal81-independent	Stp2-independent
C7_01560C_A	258.245	-2.89646	0.240417	-12.0477	1.9953e-33	1.41462e-32	depleted	NUP	Dal81-independent	Stp2-dependent
C4_05880W_A	719.489	-2.89561	0.210755	-13.7392	5.9086e-43	5.50949e-42	depleted	GAT1	Dal81-independent	Stp2-independent
C2_10580W_A	247.58	-2.87413	0.208691	-13.7721	3.74957e-43	3.51266e-42	depleted	UBC15	Dal81-independent	Stp2-independent
C2_05700W_A	9047.46	-2.86881	0.174677	-16.4235	1.29821e-60	1.97862e-59	depleted	OSM1	Dal81-dependent	Stp2-dependent
C7_02610C_A	2214.13	-2.8679	0.13768	-20.8302	2.30435e-96	8.13979e-95	depleted	orf19.2371	Dal81-independent	Stp2-independent
C1_14630C_A	92.1047	-2.86617	0.298557	-9.60009	7.98723e-22	3.94111e-21	depleted	orf19.7278	Dal81-independent	Stp2-independent
CR_05210W_A	177.711	-2.86513	0.229137	-12.504	7.09632e-36	5.3941e-35	depleted	CAWG_01853	Dal81-dependent	Stp2-independent
CR_06810W_A	5550.83	-2.86456	0.10802	-26.5186	5.90963e-155	6.22585e-153	depleted	HHT2	Dal81-independent	Stp2-independent
CM_00010W	150.589	-2.85237	0.303523	-9.39754	5.58513e-21	2.66816e-20	depleted	RRNL	Dal81-independent	Stp2-independent
C3_06570C_A	529.102	-2.84735	0.16255	-17.5168	1.06641e-68	1.97039e-67	depleted	OPI3	Dal81-dependent	Stp2-dependent
CR_05800C_A	481.25	-2.84367	0.189373	-15.0162	5.75171e-51	6.79902e-50	depleted	CAWG_01901	Dal81-independent	Stp2-independent
C4_02410C_A	6343.96	-2.82083	0.119202	-23.6643	8.40955e-124	5.04994e-122	depleted	AHP1	Dal81-dependent	Stp2-dependent
C4_03070W_A	359.165	-2.816	0.225401	-12.4933	8.12098e-36	6.15738e-35	depleted	PGA54	Dal81-dependent	Stp2-dependent
CR_01900C_A	749.334	-2.80774	0.208169	-13.4878	1.84646e-41	1.6451e-40	depleted	HNM3	Dal81-independent	Stp2-independent
C4_01250W_A	414.316	-2.8077	0.161871	-17.3453	2.14028e-67	3.83653e-66	depleted	NAT4	Dal81-dependent	Stp2-independent
C1_06250W_A	159.523	-2.80302	0.257112	-10.9019	1.12852e-27	6.82455e-27	depleted	CAWG_00784	Dal81-dependent	Stp2-dependent
C4_01390W_A	65.2065	-2.79275	0.354998	-7.86695	3.634e-15	1.31776e-14	depleted	HAP3	Dal81-independent	Stp2-independent
C1_14190C_A	67.226	-2.78513	0.337749	-8.24614	1.63597e-16	6.31767e-16	depleted	CAWG_00035	Dal81-independent	Stp2-dependent
C1_08190C_A	707.734	-2.78407	0.172032	-16.1834	6.60325e-59	9.6011e-58	depleted	CAT8	Dal81-dependent	Stp2-dependent
C3_07470W_A	110.018	-2.77617	0.303236	-9.15517	5.42714e-20	2.46894e-19	depleted	CAWG_03056	Dal81-dependent	Stp2-independent
CR_04960C_A	608.819	-2.75557	0.18399	-14.9768	1.04129e-50	1.21653e-49	depleted	CRG1	Dal81-dependent	Stp2-dependent
C6_00870C_A	11089.4	-2.74806	0.167557	-16.4007	1.88939e-60	2.84355e-59	depleted	ILV5	Dal81-dependent	Stp2-dependent
C6_00440C_A	7013.05	-2.73129	0.136685	-19.9825	7.82603e-89	2.15575e-87	depleted	FET34	Dal81-dependent	Stp2-dependent
C4_05300W_A	916.955	-2.72338	0.135088	-20.1601	2.19644e-90	6.43396e-89	depleted	XKS1	Dal81-dependent	Stp2-dependent
C2_00660C_A	318.794	-2.71866	0.204546	-13.2912	2.60347e-40	2.25596e-39	depleted	SOD4	Dal81-independent	Stp2-independent
C4_01770W_A	1247.31	-2.71587	0.153515	-17.6912	4.89878e-70	9.52012e-69	depleted	POL30	Dal81-dependent	Stp2-independent
C1_10810W_A	270.475	-2.70907	0.186679	-14.5119	1.01787e-47	1.08183e-46	depleted	CAWG_00352	Dal81-independent	Stp2-dependent
C2_04670W_A	19.7373	-2.70782	0.650982	-4.15959	3.18823e-05	6.06057e-05	depleted	CAWG_04221	Dal81-dependent	Stp2-dependent
C1_04180W_A	7145.14	-2.70137	0.11142	-24.245	7.46289e-130	5.15111e-128	depleted	CAWG_00975	Dal81-independent	Stp2-independent
C2_06890C_A	251.1	-2.69972	0.198104	-13.6278	2.73873e-42	2.50702e-41	depleted	CAWG_05788	Dal81-dependent	Stp2-dependent
C1_10700C_A	1660.35	-2.69189	0.126433	-21.2909	1.37762e-100	5.2029e-99	depleted	NIT3	Dal81-dependent	Stp2-dependent
C1_04320W_A	1293.71	-2.68795	0.127924	-21.0121	5.08418e-98	1.86162e-96	depleted	GPM2	Dal81-dependent	Stp2-independent
C1_13170C_A	848.112	-2.68533	0.152745	-17.5805	3.47627e-69	6.55856e-68	depleted	MSH6	Dal81-dependent	Stp2-dependent
C3_06590W_A	4534.65	-2.68439	0.116123	-23.1169	3.13262e-118	1.67959e-116	depleted	LYS9	Dal81-dependent	Stp2-independent
C1_01360C_A	3698.25	-2.68424	0.121871	-22.0253	1.6496e-107	7.07563e-106	depleted	CAWG_01240	Dal81-independent	Stp2-dependent
C1_14120C_A	1593.44	-2.67846	0.197455	-13.565	6.46179e-42	5.84383e-41	depleted	RBE1	Dal81-dependent	Stp2-dependent
CR_03020C_A	420.318	-2.6773	0.184712	-14.4945	1.3133e-47	1.39089e-46	depleted	CAWG_01638	Dal81-independent	Stp2-independent
CR_10330W_A	18.277	-2.67422	0.654794	-4.08406	4.42558e-05	8.26871e-05	depleted	PGA11	Dal81-independent	Stp2-independent
C4_05540W_A	3629.38	-2.65892	0.14877	-17.8727	1.9258e-71	3.81663e-70	depleted	HOM3	Dal81-dependent	Stp2-dependent
C7_01650W_A	3683.64	-2.65616	0.137377	-19.3349	2.73274e-83	6.86615e-82	depleted	CAWG_05516	Dal81-independent	Stp2-independent
C2_07260C_A	2824.83	-2.65579	0.12291	-21.6077	1.52115e-103	6.00956e-102	depleted	DQD1	Dal81-dependent	Stp2-dependent
C2_04940C_A	580.199	-2.64603	0.235269	-11.2468	2.40116e-29	1.5372e-28	depleted	ITR1	Dal81-dependent	Stp2-dependent
C1_10400C_A	1449.4	-2.64438	0.183442	-14.4154	4.14131e-47	4.34007e-46	depleted	FGR41	Dal81-dependent	Stp2-dependent
C4_03690C_A	92.3713	-2.64092	0.313242	-8.43094	3.42906e-17	1.37003e-16	depleted	CAWG_03444	Dal81-dependent	Stp2-dependent
CR_02060W_A	1716.1	-2.64057	0.142788	-18.493	2.35273e-76	5.1375e-75	depleted	CAWG_01553	Dal81-dependent	Stp2-dependent
CR_10040W_A	301.912	-2.63059	0.195607	-13.4483	3.149e-41	2.7973e-40	depleted	CAWG_02268	Dal81-independent	Stp2-independent
C1_04290C_A	10602.5	-2.62487	0.131101	-20.0217	3.56122e-89	9.94658e-88	depleted	ACS2	Dal81-independent	Stp2-independent
C2_10690W_A	2565.37	-2.60178	0.17377	-14.9725	1.1102e-50	1.29452e-49	depleted	TPS3	Dal81-dependent	Stp2-independent
C3_03910W_A	4108	-2.60034	0.111277	-23.3683	8.9897e-121	5.14125e-119	depleted	HTA1	Dal81-independent	Stp2-independent
CR_06270W_A	98.5923	-2.59037	0.299535	-8.64798	5.24181e-18	2.17083e-17	depleted	CAWG_01937	Dal81-independent	Stp2-independent
C6_02130C_A	200.88	-2.58923	0.213372	-12.1348	6.90421e-34	4.97119e-33	depleted	CTF5	Dal81-independent	Stp2-independent
C1_03510C_A	4194.28	-2.58408	0.116874	-22.1099	2.53603e-108	1.11159e-106	depleted	CAWG_01034	Dal81-independent	Stp2-independent
C1_04170C_A	6720.75	-2.58048	0.107261	-24.058	6.89179e-128	4.54782e-126	depleted	HTA2	Dal81-independent	Stp2-independent
C7_00410C_A	534.301	-2.57923	0.155693	-16.5661	1.22532e-61	1.90624e-60	depleted	CAWG_05398	Dal81-independent	Stp2-independent
C6_01480W_A	70.0133	-2.5791	0.339016	-7.60761	2.79207e-14	9.65248e-14	depleted	CAWG_05216	Dal81-independent	Stp2-independent
CR_08760C_A	11.8564	-2.57835	0.887021	-2.90675	0.00365204	0.00561601	depleted	RDN5	Dal81-independent	Stp2-independent
CR_05720W_A	2210.51	-2.57376	0.126712	-20.3119	1.00881e-91	3.0139e-90	depleted	TPS1	Dal81-independent	Stp2-independent
C1_05560W_A	2287.3	-2.57134	0.130921	-19.6405	6.97702e-86	1.83759e-84	depleted	RIB4	Dal81-independent	Stp2-independent
C4_02100C_A	396.567	-2.57048	0.249766	-10.2916	7.69262e-25	4.25361e-24	depleted	GPI14	Dal81-independent	Stp2-independent
C2_07420W_A	1155.59	-2.56762	0.130359	-19.6965	2.31212e-86	6.14349e-85	depleted	CAWG_05838	Dal81-independent	Stp2-independent
C1_04260W_A	8589.2	-2.56737	0.107491	-23.8844	4.44368e-126	2.80887e-124	depleted	HHT21	Dal81-independent	Stp2-independent
C4_00140C_A	9515.57	-2.56611	0.103948	-24.6865	1.49376e-134	1.10741e-132	depleted	HIS4	Dal81-dependent	Stp2-dependent
CR_10540C_A	387.841	-2.56495	0.179508	-14.2888	2.57045e-46	2.65673e-45	depleted	MCD1	Dal81-independent	Stp2-independent
C1_02480W_A	2131.29	-2.56107	0.113724	-22.5201	2.63628e-112	1.24653e-110	depleted	PMM1	Dal81-independent	Stp2-independent
CM_00210W	11.8965	-2.56001	0.898544	-2.84906	0.00438481	0.00668295	depleted	COX1	Dal81-dependent	Stp2-dependent
C1_04240C_A	5964.61	-2.55422	0.107779	-23.6988	3.71209e-124	2.25162e-122	depleted	HHF1	Dal81-independent	Stp2-independent
C1_09190C_A	6367.28	-2.55342	0.122001	-20.9296	2.88029e-97	1.02344e-95	depleted	DAK2	Dal81-independent	Stp2-independent
C1_00840C_A	357.549	-2.54762	0.171235	-14.8779	4.58819e-50	5.28831e-49	depleted	NRM1	Dal81-independent	Stp2-independent
C6_02990W_A	310.867	-2.52434	0.195057	-12.9416	2.62282e-38	2.14871e-37	depleted	CAWG_05094	Dal81-dependent	Stp2-independent
C4_06340W_A	830.848	-2.5189	0.152612	-16.5052	3.36361e-61	5.15267e-60	depleted	AGO1	Dal81-dependent	Stp2-dependent
C6_03060W_A	13.9475	-2.51389	0.813438	-3.09045	0.00199854	0.00315573	depleted	PGA60	Dal81-independent	Stp2-dependent
C2_00390C_A	1799.88	-2.51024	0.153023	-16.4043	1.7823e-60	2.69294e-59	depleted	CAWG_03819	Dal81-independent	Stp2-independent
CR_09050C_A	136.359	-2.50979	0.250692	-10.0115	1.35704e-23	7.12328e-23	depleted	orf19.7301	Dal81-independent	Stp2-independent
C3_02320W_A	9303.79	-2.48732	0.162624	-15.2949	8.27302e-53	1.03069e-51	depleted	ILV2	Dal81-dependent	Stp2-dependent
C1_09670C_A	303.442	-2.46325	0.187289	-13.1521	1.65442e-39	1.3973e-38	depleted	CAWG_00463	Dal81-independent	Stp2-independent
C7_01800C_A	27040.2	-2.46154	0.125847	-19.5598	3.40085e-85	8.87918e-84	depleted	PFK2	Dal81-independent	Stp2-independent
C4_06490C_A	215.187	-2.4582	0.219502	-11.199	4.12552e-29	2.62434e-28	depleted	PRI2	Dal81-independent	Stp2-independent
C3_01370C_A	18.4262	-2.45326	0.586787	-4.18083	2.90449e-05	5.54226e-05	depleted	PGA44	Dal81-dependent	Stp2-independent
CR_04060C_A	980.481	-2.44947	0.159961	-15.3129	6.27277e-53	7.86388e-52	depleted	DAP1	Dal81-dependent	Stp2-independent
C2_09850C_A	22.1697	-2.44696	0.556343	-4.39829	1.09106e-05	2.16445e-05	depleted	CAWG_06057	Dal81-independent	Stp2-independent
C1_09080C_A	1948.08	-2.44486	0.165875	-14.7392	3.61062e-49	4.06026e-48	depleted	PGA6	Dal81-dependent	Stp2-dependent
C2_05210W_A	125.569	-2.44469	0.261337	-9.35453	8.39745e-21	3.97373e-20	depleted	DAD2	Dal81-independent	Stp2-independent
C6_01670W_A	2580.16	-2.44296	0.123435	-19.7914	3.53338e-87	9.47228e-86	depleted	MAE1	Dal81-independent	Stp2-independent
C2_07750W_A	232.086	-2.43934	0.214017	-11.3979	4.28438e-30	2.79649e-29	depleted	RHO2	Dal81-dependent	Stp2-independent
C4_03510C_A	9.12968	-2.43924	1.05506	-2.31194	0.0207811	0.0289739	depleted	HWP2	Dal81-independent	Stp2-independent
C1_08150C_A	50.4922	-2.4382	0.38458	-6.33989	2.29933e-10	6.44305e-10	depleted	CAWG_00608	Dal81-independent	Stp2-independent
C4_07090C_A	2738.02	-2.43618	0.146881	-16.5861	8.78853e-62	1.37078e-60	depleted	TRP4	Dal81-dependent	Stp2-dependent
C1_07860W_A	73.1166	-2.42316	0.371882	-6.51593	7.22384e-11	2.07258e-10	depleted	CAWG_00634	Dal81-independent	Stp2-independent
C1_08460C_A	3696.97	-2.42179	0.119022	-20.3473	4.90205e-92	1.47924e-90	depleted	UPC2	Dal81-independent	Stp2-independent
C1_01930W_A	2180.34	-2.42118	0.153298	-15.7939	3.42794e-56	4.66775e-55	depleted	CAWG_01187	Dal81-independent	Stp2-independent
C5_05050W_A	199832	-2.41962	0.146358	-16.5322	2.14979e-61	3.30166e-60	depleted	ADH1	Dal81-dependent	Stp2-dependent
C1_01260C_A	154.475	-2.41423	0.228975	-10.5437	5.43369e-26	3.09283e-25	depleted	TRS20	Dal81-dependent	Stp2-independent
CR_03690W_A	293.399	-2.41036	0.258327	-9.33063	1.05241e-20	4.95666e-20	depleted	CAWG_01705	Dal81-independent	Stp2-dependent
C1_08790W_A	2284.54	-2.4093	0.171771	-14.0262	1.07718e-44	1.05349e-43	depleted	TPO3	Dal81-independent	Stp2-independent
CR_03280W_A	719.414	-2.40295	0.167402	-14.3544	1.00056e-46	1.03951e-45	depleted	IFR2	Dal81-dependent	Stp2-dependent
C1_03380W_A	4474.52	-2.40122	0.12333	-19.4698	1.97978e-84	5.01627e-83	depleted	TPS2	Dal81-dependent	Stp2-dependent
C3_07330W_A	277.939	-2.4003	0.192972	-12.4386	1.61344e-35	1.21261e-34	depleted	CAWG_03042	Dal81-dependent	Stp2-dependent
C1_04150C_A	109.086	-2.39649	0.291325	-8.22618	1.93274e-16	7.43029e-16	depleted	CAWG_00978	Dal81-independent	Stp2-independent
C2_05190W_A	549.463	-2.3912	0.168458	-14.1947	9.88331e-46	9.94125e-45	depleted	CDC21	Dal81-dependent	Stp2-dependent
CM_00230W	19.17	-2.38539	0.749114	-3.18429	0.00145112	0.00232558	depleted	CaalfMp08.2	Dal81-dependent	Stp2-independent
CR_06920W_A	56.4327	-2.38202	0.350603	-6.79407	1.09014e-11	3.2797e-11	depleted	CAWG_01989	Dal81-independent	Stp2-independent
C2_04450W_A	87.2733	-2.3793	0.37848	-6.28647	3.24773e-10	8.99568e-10	depleted	CAWG_04201	Dal81-independent	Stp2-independent
CR_07010W_A	6893.35	-2.37837	0.107324	-22.1606	8.23564e-109	3.69067e-107	depleted	MIS11	Dal81-dependent	Stp2-dependent
C2_02030W_A	6303.25	-2.37465	0.134449	-17.6621	8.20557e-70	1.58439e-68	depleted	ARO3	Dal81-dependent	Stp2-dependent
C2_06140C_A	42.6828	-2.37133	0.404175	-5.8671	4.43493e-09	1.14103e-08	depleted	CAWG_04357	Dal81-independent	Stp2-independent
C2_08800C_A	1936.59	-2.37096	0.130978	-18.102	3.074e-73	6.45432e-72	depleted	APE3	Dal81-independent	Stp2-independent
C1_08240C_A	332.415	-2.36163	0.190125	-12.4215	1.99852e-35	1.4964e-34	depleted	orf19.5103	Dal81-independent	Stp2-independent
C2_08170W_A	38.8457	-2.35872	0.462025	-5.10517	3.30491e-07	7.43296e-07	depleted	CAWG_05908	Dal81-independent	Stp2-independent
CM_00360W	35.4264	-2.35445	0.478617	-4.91928	8.68617e-07	1.8885e-06	depleted	RRNS	Dal81-independent	Stp2-independent
C4_05320W_A	3645.19	-2.35389	0.138634	-16.9792	1.16977e-64	1.91925e-63	depleted	LYS1	Dal81-dependent	Stp2-dependent
C2_07270W_A	1319.08	-2.35223	0.128281	-18.3366	4.22486e-75	9.15895e-74	depleted	CAWG_05823	Dal81-dependent	Stp2-independent
C1_07450W_A	49.8433	-2.35195	0.369366	-6.36753	1.92102e-10	5.39557e-10	depleted	snR42a	Dal81-independent	Stp2-independent
C1_08490W_A	1381.67	-2.35143	0.122967	-19.1225	1.6394e-81	4.03466e-80	depleted	CAWG_00577	Dal81-independent	Stp2-independent
C6_00830C_A	1929.26	-2.34347	0.155082	-15.1111	1.36777e-51	1.64929e-50	depleted	CAN3	Dal81-independent	Stp2-dependent
CR_07680C_A	43.097	-2.33413	0.409568	-5.699	1.20511e-08	3.00528e-08	depleted	CAWG_02064	Dal81-dependent	Stp2-dependent
C4_06670W_A	589.725	-2.32961	0.15316	-15.2103	3.02132e-52	3.71023e-51	depleted	CAWG_03162	Dal81-dependent	Stp2-dependent
C4_06660W_A	133.477	-2.32232	0.264854	-8.7683	1.81388e-18	7.71413e-18	depleted	orf19.2866	Dal81-independent	Stp2-independent
C2_09470C_A	176.793	-2.31955	0.231124	-10.0359	1.05937e-23	5.59499e-23	depleted	PMS1	Dal81-dependent	Stp2-dependent
C4_02570C_A	144.798	-2.31808	0.27338	-8.47933	2.26489e-17	9.11572e-17	depleted	CAWG_03538	Dal81-dependent	Stp2-dependent
C2_09620W_A	434.294	-2.31631	0.187706	-12.3401	5.51171e-35	4.08111e-34	depleted	CAWG_06035	Dal81-dependent	Stp2-dependent
C7_03300C_A	484.738	-2.31476	0.184707	-12.5321	4.98331e-36	3.80722e-35	depleted	LIP8	Dal81-independent	Stp2-independent
C1_03460C_A	303.727	-2.31149	0.177757	-13.0036	1.16689e-38	9.63848e-38	depleted	CAWG_01039	Dal81-dependent	Stp2-dependent
C4_00910C_A	407.888	-2.30969	0.18044	-12.8004	1.63179e-37	1.30304e-36	depleted	CAWG_03690	Dal81-independent	Stp2-independent
C5_04220W_A	11.2589	-2.30636	0.79902	-2.88649	0.00389566	0.00596924	depleted	MRV5	Dal81-independent	Stp2-dependent
C1_11390W_A	22.2986	-2.28797	0.55017	-4.15865	3.20128e-05	6.08153e-05	depleted	CAWG_00297	Dal81-independent	Stp2-independent
CR_07710W_A	4717.55	-2.28364	0.132947	-17.1771	3.94444e-66	6.76752e-65	depleted	ARO2	Dal81-dependent	Stp2-dependent
C1_11530C_A	52.6473	-2.28292	0.417705	-5.46538	4.61917e-08	1.10599e-07	depleted	CAWG_00284	Dal81-dependent	Stp2-dependent
C3_07950C_A	10420	-2.27696	0.101947	-22.3349	1.69434e-110	7.82655e-109	depleted	SRB1	Dal81-independent	Stp2-independent
C3_03900C_A	6125.87	-2.27693	0.10642	-21.3957	1.46471e-101	5.63819e-100	depleted	HTB1	Dal81-independent	Stp2-independent
CR_05790C_A	3149.61	-2.27031	0.149455	-15.1906	4.07899e-52	4.96843e-51	depleted	ACO2	Dal81-dependent	Stp2-dependent
CR_03470W_A	648.325	-2.26646	0.143774	-15.7641	5.49514e-56	7.43206e-55	depleted	CAWG_01682	Dal81-independent	Stp2-independent
C6_00180C_A	48.9623	-2.25414	0.407476	-5.53195	3.16685e-08	7.65269e-08	depleted	CAWG_05339	Dal81-dependent	Stp2-independent
C1_04450C_A	515.595	-2.24901	0.224405	-10.0221	1.21894e-23	6.41522e-23	depleted	FMA1	Dal81-independent	Stp2-independent
C1_12220W_A	205.536	-2.24567	0.207257	-10.8352	2.34539e-27	1.40419e-26	depleted	CDC6	Dal81-independent	Stp2-independent
C7_01630W_A	326.68	-2.24535	0.189518	-11.8476	2.21335e-32	1.52772e-31	depleted	RNH35	Dal81-independent	Stp2-independent
CR_00060C_A	1128.32	-2.24255	0.128807	-17.4102	6.90204e-68	1.2484e-66	depleted	CAWG_01367	Dal81-independent	Stp2-independent
C1_01650W_A	774.219	-2.24198	0.147151	-15.236	2.04127e-52	2.52219e-51	depleted	ISN1	Dal81-dependent	Stp2-dependent
C2_00630C_A	325.966	-2.2381	0.228134	-9.81045	1.01517e-22	5.17059e-22	depleted	CAWG_03842	Dal81-independent	Stp2-independent
CR_10860C_A	898.177	-2.23681	0.136518	-16.3847	2.46017e-60	3.69333e-59	depleted	CTA26	Dal81-independent	Stp2-independent
C1_08170C_A	1179.98	-2.23213	0.138063	-16.1674	8.55841e-59	1.23839e-57	depleted	BUL1	Dal81-dependent	Stp2-independent
CR_05710C_A	171.896	-2.2315	0.213441	-10.4549	1.39156e-25	7.85367e-25	depleted	CAWG_01892	Dal81-independent	Stp2-independent
C2_04460W_A	5934.78	-2.23116	0.17682	-12.6182	1.67602e-36	1.30538e-35	depleted	LYS22	Dal81-dependent	Stp2-dependent
CR_04890W_A	101.968	-2.22603	0.312194	-7.13026	1.00181e-12	3.19652e-12	depleted	LYS5	Dal81-independent	Stp2-independent
C1_07530W_A	31.4479	-2.22078	0.517801	-4.28887	1.79586e-05	3.50021e-05	depleted	CAWG_00667	Dal81-independent	Stp2-independent
C4_04050C_A	1128.32	-2.21981	0.149893	-14.8093	1.27582e-49	1.451e-48	depleted	RHD3	Dal81-dependent	Stp2-dependent
C3_07210W_A	654.859	-2.21967	0.141536	-15.6827	1.98608e-55	2.66214e-54	depleted	MET8	Dal81-independent	Stp2-independent
C4_03940C_A	6096.2	-2.2145	0.138789	-15.9559	2.5931e-57	3.63822e-56	depleted	PYC2	Dal81-dependent	Stp2-dependent
CR_08510W_A	27.4842	-2.21343	0.554208	-3.99386	6.50065e-05	0.000119524	depleted	PGA13	Dal81-dependent	Stp2-independent
CR_00750C_A	213.777	-2.21323	0.23638	-9.36302	7.74878e-21	3.67257e-20	depleted	CAWG_01433	Dal81-dependent	Stp2-dependent
C7_03140W_A	107.144	-2.21125	0.268955	-8.22163	2.00761e-16	7.71319e-16	depleted	CAWG_05647	Dal81-dependent	Stp2-dependent
C7_02210W_A	13.4343	-2.20996	0.716595	-3.08397	0.00204259	0.00322359	depleted	CAWG_05570	Dal81-independent	Stp2-independent
C3_07350W_A	525.991	-2.20825	0.159192	-13.8716	9.41636e-44	9.03278e-43	depleted	CAWG_03044	Dal81-independent	Stp2-independent
C5_04810W_A	19684.5	-2.20554	0.108402	-20.3459	5.05208e-92	1.51689e-90	depleted	PFK1	Dal81-independent	Stp2-independent
C5_03060C_A	1156.89	-2.19566	0.4694	-4.67759	2.90273e-06	6.02727e-06	depleted	TNA1	Dal81-dependent	Stp2-dependent
C7_00970C_A	505.883	-2.1895	0.187281	-11.691	1.4173e-31	9.56278e-31	depleted	YOX1	Dal81-dependent	Stp2-dependent
C6_00160W_A	434.277	-2.18789	0.163053	-13.4183	4.72526e-41	4.16058e-40	depleted	PGA48	Dal81-dependent	Stp2-independent
C4_06140C_A	160.504	-2.17917	0.269524	-8.08526	6.20341e-16	2.33113e-15	depleted	CAWG_03210	Dal81-independent	Stp2-independent
C3_07220C_A	1879.92	-2.17735	0.126568	-17.203	2.5205e-66	4.38713e-65	depleted	PRO2	Dal81-independent	Stp2-independent
C1_09400C_A	204.456	-2.17509	0.230342	-9.44289	3.62633e-21	1.74768e-20	depleted	FTH1	Dal81-independent	Stp2-dependent
CR_07460C_A	365.51	-2.17335	0.185794	-11.6976	1.31118e-31	8.8767e-31	depleted	CAWG_02042	Dal81-dependent	Stp2-dependent
CR_05440W_A	574.381	-2.16439	0.177226	-12.2126	2.66146e-34	1.93254e-33	depleted	CAWG_01868	Dal81-dependent	Stp2-dependent
CR_01870C_A	30.309	-2.16298	0.531752	-4.06765	4.749e-05	8.83722e-05	depleted	CAWG_01548	Dal81-independent	Stp2-independent
C2_00770W_A	349.344	-2.16217	0.264847	-8.16386	3.24492e-16	1.23876e-15	depleted	CAWG_03856	Dal81-dependent	Stp2-dependent
C1_02590C_A	4579.4	-2.15948	0.11426	-18.8997	1.1475e-79	2.6917e-78	depleted	SNZ1	Dal81-independent	Stp2-dependent
C5_00870C_A	92.6987	-2.15899	0.325944	-6.62381	3.50067e-11	1.02145e-10	depleted	GIT4	Dal81-independent	Stp2-independent
C6_04480C_A	811.012	-2.155	0.151729	-14.203	8.78114e-46	8.87723e-45	depleted	CAWG_04933	Dal81-independent	Stp2-independent
C4_00210W_A	153.513	-2.15258	0.267551	-8.04551	8.5886e-16	3.20737e-15	depleted	CAWG_03762	Dal81-independent	Stp2-independent
CR_03090C_A	582.682	-2.14368	0.15885	-13.495	1.67332e-41	1.49306e-40	depleted	MLC1	Dal81-independent	Stp2-independent
C3_06280W_A	1435.56	-2.14214	0.147213	-14.5513	5.72924e-48	6.15458e-47	depleted	CAWG_02939	Dal81-independent	Stp2-independent
C2_10320C_A	35.8391	-2.1408	0.573789	-3.73099	0.00019073	0.000336566	depleted	CAWG_06103	Dal81-independent	Stp2-independent
C1_02820W_A	4997.41	-2.13946	0.124496	-17.185	3.43974e-66	5.96984e-65	depleted	LYS2	Dal81-dependent	Stp2-dependent
C1_01190C_A	560.262	-2.13459	0.157446	-13.5576	7.1399e-42	6.4377e-41	depleted	CAWG_01256	Dal81-independent	Stp2-independent
CR_09680C_A	22.6654	-2.13213	0.57531	-3.70606	0.000210507	0.000369771	depleted	RTA4	Dal81-dependent	Stp2-dependent
C3_04300C_A	1136.59	-2.13066	0.125583	-16.9661	1.46307e-64	2.38742e-63	depleted	POL1	Dal81-independent	Stp2-independent
CR_00780C_A	5450.31	-2.13054	0.132168	-16.1199	1.8498e-58	2.65742e-57	depleted	GSY1	Dal81-dependent	Stp2-dependent
C5_03910C_A	14.9555	-2.12187	0.70195	-3.02283	0.00250424	0.00392023	depleted	CAWG_04763	Dal81-dependent	Stp2-independent
C4_04160W_A	2684.83	-2.12099	0.133692	-15.8647	1.11309e-56	1.53305e-55	depleted	CAWG_03404	Dal81-independent	Stp2-independent
C4_04410C_A	1996.1	-2.11985	0.137848	-15.3781	2.29453e-53	2.91921e-52	depleted	LYS4	Dal81-dependent	Stp2-dependent
C1_12180C_A	542.401	-2.11414	0.152865	-13.8301	1.67755e-43	1.59394e-42	depleted	CAWG_00224	Dal81-independent	Stp2-independent
C1_11440C_A	413.797	-2.10779	0.159714	-13.1973	9.09079e-40	7.73232e-39	depleted	GIN1	Dal81-independent	Stp2-independent
CR_10200W_A	16.1139	-2.10678	0.655732	-3.21287	0.00131414	0.00211567	depleted	CAWG_02280	Dal81-independent	Stp2-independent
C2_02660W_A	253.338	-2.1036	0.204951	-10.2639	1.02499e-24	5.65725e-24	depleted	CAWG_04034	Dal81-independent	Stp2-independent
C7_02810W_A	843.064	-2.09873	0.144556	-14.5184	9.25984e-48	9.87661e-47	depleted	PRX1	Dal81-independent	Stp2-independent
C1_13350W_A	817.677	-2.09515	0.659217	-3.17824	0.00148173	0.00237338	depleted	STP2	Dal81-independent	Stp2-dependent
C2_02670C_A	143.809	-2.09432	0.255648	-8.19219	2.56511e-16	9.81114e-16	depleted	orf19.5840	Dal81-independent	Stp2-independent
C1_12190W_A	348.589	-2.09215	0.185974	-11.2497	2.32449e-29	1.4913e-28	depleted	BUL4	Dal81-independent	Stp2-independent
C2_02790C_A	18.2228	-2.08849	0.632245	-3.30329	0.00095557	0.00156312	depleted	CAWG_04047	Dal81-independent	Stp2-independent
C1_13860C_A	18764.6	-2.08815	0.118558	-17.6129	1.95988e-69	3.72439e-68	depleted	GND1	Dal81-dependent	Stp2-dependent
C1_12840W_A	100.817	-2.08591	0.266494	-7.82723	4.98755e-15	1.79773e-14	depleted	CAWG_00158	Dal81-dependent	Stp2-dependent
C2_01410C_A	803.157	-2.08564	0.140229	-14.873	4.93167e-50	5.67331e-49	depleted	CLB2	Dal81-independent	Stp2-dependent
C2_03580W_A	31.322	-2.08135	0.495006	-4.2047	2.61433e-05	5.01728e-05	depleted	snR43b	Dal81-independent	Stp2-independent
C3_02700W_A	298.899	-2.08117	0.196607	-10.5854	3.48188e-26	2.00083e-25	depleted	SMC3	Dal81-independent	Stp2-independent
C5_03440W_A	666.782	-2.07863	0.169557	-12.2592	1.50039e-34	1.09742e-33	depleted	orf19.2638.1	Dal81-dependent	Stp2-dependent
C2_03010C_A	6695.06	-2.07558	0.120609	-17.2092	2.2665e-66	3.95649e-65	depleted	RNR21	Dal81-independent	Stp2-independent
C3_04790W_A	230.102	-2.07455	0.223181	-9.29538	1.46686e-20	6.8638e-20	depleted	CAWG_02792	Dal81-dependent	Stp2-dependent
C3_01280W_A	629.5	-2.07348	0.154607	-13.4113	5.19215e-41	4.55832e-40	depleted	CAWG_02461	Dal81-dependent	Stp2-dependent
CR_08840C_A	236.453	-2.07101	0.20565	-10.0706	7.45566e-24	3.97613e-23	depleted	NIT2	Dal81-dependent	Stp2-dependent
C1_06630W_A	459.2	-2.07054	0.193792	-10.6843	1.20518e-26	7.01268e-26	depleted	CAWG_00749	Dal81-independent	Stp2-independent
C3_01470W_A	379.662	-2.06823	0.21623	-9.56498	1.12222e-21	5.5147e-21	depleted	ARF3	Dal81-dependent	Stp2-dependent
C1_11340W_A	59.5643	-2.06598	0.345519	-5.97935	2.24025e-09	5.86431e-09	depleted	PRM1	Dal81-dependent	Stp2-independent
CR_04770C_A	157.093	-2.0645	0.219673	-9.39808	5.55703e-21	2.65684e-20	depleted	CAWG_01810	Dal81-independent	Stp2-independent
C4_04620C_A	53.25	-2.06429	0.418971	-4.92706	8.34745e-07	1.82079e-06	depleted	CAWG_06157	Dal81-independent	Stp2-independent
C3_05960W_A	155.277	-2.06098	0.253189	-8.14008	3.95008e-16	1.49749e-15	depleted	ASE1	Dal81-independent	Stp2-independent
C1_02780W_A	1492.15	-2.06022	0.139296	-14.7902	1.69383e-49	1.92277e-48	depleted	CAWG_01106	Dal81-independent	Stp2-independent
C1_08140W_A	238.812	-2.05946	0.188096	-10.9489	6.72336e-28	4.09886e-27	depleted	CAWG_00609	Dal81-independent	Stp2-independent
C3_02090C_A	624.555	-2.05894	0.159229	-12.9307	3.01966e-38	2.47044e-37	depleted	CAWG_02536	Dal81-independent	Stp2-independent
C1_06190C_A	2046.57	-2.05583	0.127707	-16.098	2.63386e-58	3.77478e-57	depleted	orf19.2662	Dal81-independent	Stp2-independent
C3_04600C_A	613.386	-2.05437	0.19476	-10.5482	5.17842e-26	2.95033e-25	depleted	CAWG_02773	Dal81-independent	Stp2-independent
C2_02370C_A	6026.24	-2.05394	0.10549	-19.4704	1.95546e-84	4.97566e-83	depleted	HOM2	Dal81-dependent	Stp2-dependent
C2_01400C_A	161.987	-2.05269	0.289344	-7.09428	1.30029e-12	4.11175e-12	depleted	ESC4	Dal81-independent	Stp2-independent
CR_02820W_A	2337.66	-2.05141	0.12874	-15.9345	3.6493e-57	5.09628e-56	depleted	PGM2	Dal81-dependent	Stp2-dependent
C1_14430C_A	937.892	-2.04839	0.16321	-12.5506	3.94335e-36	3.02424e-35	depleted	CAWG_00012	Dal81-independent	Stp2-independent
C1_06700W_A	401.798	-2.04601	0.170592	-11.9936	3.84083e-33	2.70706e-32	depleted	CAWG_00743	Dal81-independent	Stp2-independent
C1_12360C_A	1602.01	-2.04332	0.140124	-14.5822	3.64544e-48	3.96573e-47	depleted	RIB3	Dal81-independent	Stp2-independent
C1_09720W_A	4696.75	-2.03736	0.118558	-17.1845	3.47201e-66	6.00849e-65	depleted	URA1	Dal81-independent	Stp2-independent
C2_07660W_A	615.773	-2.03223	0.15275	-13.3043	2.18604e-40	1.89974e-39	depleted	PDS5	Dal81-dependent	Stp2-dependent
C1_06180W_A	1650.11	-2.02541	0.123883	-16.3494	4.39534e-60	6.54939e-59	depleted	TLO34	Dal81-dependent	Stp2-independent
CR_01360W_A	154.587	-2.02133	0.254813	-7.93259	2.14624e-15	7.87304e-15	depleted	CAWG_01488	Dal81-independent	Stp2-independent
C2_09710C_A	876.793	-2.02007	0.140082	-14.4206	3.84096e-47	4.03234e-46	depleted	CAWG_06044	Dal81-dependent	Stp2-dependent
C7_03350C_A	318.286	-2.01879	0.206696	-9.76695	1.56083e-22	7.87631e-22	depleted	CAWG_05668	Dal81-independent	Stp2-independent
C6_02570C_A	274.212	-2.01829	0.205273	-9.83224	8.17807e-23	4.19022e-22	depleted	SEC20	Dal81-independent	Stp2-independent
CR_10360C_A	2476.06	-2.01447	0.127538	-15.7951	3.36199e-56	4.58835e-55	depleted	CTM1	Dal81-dependent	Stp2-dependent
CR_10620C_A	1535.57	-2.01391	0.14402	-13.9836	1.96376e-44	1.90815e-43	depleted	CAWG_02319	Dal81-independent	Stp2-dependent
C1_00420W_A	978.45	-2.01083	0.147678	-13.6164	3.20076e-42	2.92106e-41	depleted	CAWG_01331	Dal81-dependent	Stp2-dependent
C1_10300W_A	198.936	-2.00585	0.21444	-9.3539	8.44763e-21	3.99433e-20	depleted	MNN12	Dal81-independent	Stp2-independent
C3_01040C_A	14.9555	-1.99965	0.662455	-3.01854	0.00253993	0.00397402	depleted	PRM9	Dal81-independent	Stp2-independent
C6_02870W_A	1376.6	-1.99866	0.125293	-15.9519	2.76369e-57	3.86852e-56	depleted	RNH1	Dal81-independent	Stp2-dependent
C6_02580W_A	443.957	-1.99239	0.166418	-11.9722	4.96823e-33	3.48938e-32	depleted	CAWG_05110	Dal81-independent	Stp2-independent
C2_06190W_A	3285.24	-1.99012	0.129998	-15.3089	6.6653e-53	8.33857e-52	depleted	ILV1	Dal81-dependent	Stp2-dependent
CR_01830C_A	13.1724	-1.98575	0.777413	-2.5543	0.01064	0.0153923	depleted	PTR2	Dal81-independent	Stp2-independent
CR_02150W_A	535.87	-1.98349	0.154507	-12.8375	1.0105e-37	8.11237e-37	depleted	MDL1	Dal81-dependent	Stp2-dependent
C4_00890W_A	6084.13	-1.98258	0.10988	-18.0432	8.92585e-73	1.83561e-71	depleted	ARO1	Dal81-dependent	Stp2-dependent
C6_03420W_A	130.581	-1.98213	0.247501	-8.00859	1.16031e-15	4.31166e-15	depleted	CAWG_05028	Dal81-independent	Stp2-independent
C6_03050C_A	104.513	-1.9794	0.295893	-6.6896	2.23787e-11	6.62644e-11	depleted	CAWG_05064	Dal81-dependent	Stp2-dependent
C3_05470W_A	742.987	-1.97821	0.144138	-13.7245	7.24691e-43	6.72608e-42	depleted	TEA1	Dal81-independent	Stp2-independent
C4_03860C_A	121.662	-1.9771	0.284455	-6.95046	3.64099e-12	1.1178e-11	depleted	CAWG_03426	Dal81-independent	Stp2-independent
C5_02460C_A	1081.51	-1.97385	0.184641	-10.6902	1.13159e-26	6.59725e-26	depleted	ECM331	Dal81-independent	Stp2-independent
C1_06900C_A	3180.14	-1.97309	0.133176	-14.8157	1.15984e-49	1.32412e-48	depleted	MMD1	Dal81-independent	Stp2-dependent
C1_05300C_A	1593.71	-1.9704	0.139995	-14.0749	5.4217e-45	5.34603e-44	depleted	PRD1	Dal81-dependent	Stp2-dependent
C1_11350C_A	714.801	-1.96633	0.13792	-14.2571	4.05164e-46	4.13075e-45	depleted	TOS4	Dal81-independent	Stp2-independent
C1_14320C_A	2224.57	-1.96362	0.128985	-15.2237	2.46236e-52	3.03001e-51	depleted	CAWG_00022	Dal81-dependent	Stp2-dependent
C5_04190W_A	41.7805	-1.96265	0.394131	-4.97969	6.36852e-07	1.40238e-06	depleted	MRV2	Dal81-independent	Stp2-independent
C1_10820C_A	1310.65	-1.9591	0.123574	-15.8537	1.32464e-56	1.82024e-55	depleted	CAWG_00351	Dal81-dependent	Stp2-dependent
C1_12880C_A	151.738	-1.95654	0.235611	-8.30412	1.00563e-16	3.92897e-16	depleted	orf19.4918	Dal81-dependent	Stp2-dependent
C1_03490W_A	784.37	-1.9558	0.145436	-13.4478	3.17038e-41	2.81213e-40	depleted	CAWG_01036	Dal81-dependent	Stp2-dependent
C4_05530W_A	132.54	-1.95529	0.276288	-7.07701	1.47294e-12	4.63089e-12	depleted	FGR6-10	Dal81-independent	Stp2-independent
C4_05890W_A	86.2271	-1.95522	0.272568	-7.17334	7.31924e-13	2.34787e-12	depleted	CAWG_03233	Dal81-dependent	Stp2-dependent
CR_07470W_A	170.281	-1.95208	0.235045	-8.30512	9.97153e-17	3.89838e-16	depleted	CAWG_02043	Dal81-independent	Stp2-independent
C1_11330C_A	2203.59	-1.95005	0.125021	-15.5978	7.53908e-55	9.97184e-54	depleted	SMT3	Dal81-independent	Stp2-independent
C7_03720C_A	4064.87	-1.94423	0.129502	-15.0132	6.02149e-51	7.09001e-50	depleted	HIS7	Dal81-dependent	Stp2-dependent
C5_00650C_A	2787.38	-1.94289	0.149628	-12.9848	1.49213e-38	1.22743e-37	depleted	THR1	Dal81-dependent	Stp2-dependent
CR_07120C_A	138.249	-1.93611	0.259234	-7.46859	8.10569e-14	2.74378e-13	depleted	CAWG_02010	Dal81-independent	Stp2-independent
C3_01940C_A	549.122	-1.93366	0.208983	-9.25271	2.18875e-20	1.01572e-19	depleted	CAWG_02522	Dal81-independent	Stp2-independent
C2_06270W_A	78.3146	-1.93147	0.302175	-6.39189	1.63845e-10	4.60839e-10	depleted	CAWG_04371	Dal81-independent	Stp2-independent
C6_03550C_A	401.239	-1.93144	0.182816	-10.565	4.33178e-26	2.47737e-25	depleted	CAWG_05015	Dal81-independent	Stp2-independent
C2_09060C_A	9006.98	-1.9271	0.128595	-14.9857	9.10036e-51	1.06526e-49	depleted	ASN1	Dal81-dependent	Stp2-dependent
C5_04110W_A	1930.04	-1.92463	0.211392	-9.10453	8.6642e-20	3.90311e-19	depleted	SCW11	Dal81-dependent	Stp2-dependent
C6_01690W_A	380.797	-1.923	0.159135	-12.084	1.28293e-33	9.16051e-33	depleted	ACF2	Dal81-independent	Stp2-independent
CR_02490W_A	104.71	-1.91336	0.291253	-6.56943	5.05077e-11	1.45957e-10	depleted	OPT4	Dal81-independent	Stp2-dependent
C7_02750W_A	95.3663	-1.91242	0.321609	-5.9464	2.74103e-09	7.13167e-09	depleted	FGR6-1	Dal81-independent	Stp2-independent
C4_00370W_A	271.466	-1.91156	0.195479	-9.77887	1.38749e-22	7.02518e-22	depleted	HOF1	Dal81-independent	Stp2-dependent
C2_06130W_A	264.682	-1.90918	0.203533	-9.38019	6.58517e-21	3.13841e-20	depleted	CSM3	Dal81-independent	Stp2-independent
C2_07650C_A	624.452	-1.9086	0.144011	-13.2532	4.32555e-40	3.70541e-39	depleted	CAWG_05861	Dal81-dependent	Stp2-dependent
C3_00440W_A	89.1654	-1.90283	0.290609	-6.54773	5.84178e-11	1.68249e-10	depleted	CAWG_02379	Dal81-independent	Stp2-independent
C3_02510C_A	64.8849	-1.8996	0.339756	-5.59107	2.25669e-08	5.52444e-08	depleted	SAP8	Dal81-independent	Stp2-independent
C2_03590C_A	206.278	-1.8984	0.20185	-9.40503	5.20151e-21	2.49084e-20	depleted	CAP4	Dal81-independent	Stp2-dependent
C2_02880C_A	381.734	-1.89783	0.176131	-10.7751	4.5121e-27	2.66423e-26	depleted	EBP7	Dal81-independent	Stp2-independent
C4_00650W_A	3133.14	-1.89654	0.15201	-12.4764	1.00422e-35	7.57582e-35	depleted	HIS5	Dal81-dependent	Stp2-dependent
CR_02280W_A	185.721	-1.8958	0.253764	-7.47073	7.97542e-14	2.70121e-13	depleted	PGA23	Dal81-dependent	Stp2-dependent
C2_02850W_A	30.1955	-1.8944	0.472282	-4.01116	6.04202e-05	0.000111398	depleted	UGA6	Dal81-independent	Stp2-dependent
CR_05390W_A	4685.43	-1.89149	0.14418	-13.119	2.56245e-39	2.14609e-38	depleted	PST3	Dal81-independent	Stp2-independent
C2_10310C_A	150.642	-1.89049	0.227611	-8.30577	9.91739e-17	3.87973e-16	depleted	KIP2	Dal81-dependent	Stp2-dependent
CR_08010W_A	250.662	-1.88865	0.18426	-10.2499	1.18433e-24	6.51274e-24	depleted	DAD4	Dal81-dependent	Stp2-independent
CR_06260W_A	308.643	-1.88819	0.19767	-9.55223	1.26934e-21	6.20714e-21	depleted	orf19.3878	Dal81-independent	Stp2-independent
C7_01100C_A	252.477	-1.88157	0.201173	-9.35298	8.52097e-21	4.02584e-20	depleted	CAWG_05466	Dal81-independent	Stp2-independent
C3_03270W_A	130.086	-1.88065	0.27976	-6.72239	1.78766e-11	5.31956e-11	depleted	CAWG_02667	Dal81-dependent	Stp2-dependent
CR_00990W_A	295.971	-1.88008	0.212941	-8.8291	1.05521e-18	4.5554e-18	depleted	CAWG_01452	Dal81-independent	Stp2-independent
CR_01620C_A	16108.9	-1.87898	0.121191	-15.5043	3.24364e-54	4.21604e-53	depleted	MET6	Dal81-dependent	Stp2-dependent
C1_04270C_A	29.4058	-1.87747	0.479256	-3.91747	8.94835e-05	0.000162882	depleted	CAWG_00966	Dal81-independent	Stp2-independent
C2_02590W_A	2124.73	-1.87611	0.137621	-13.6324	2.56919e-42	2.35542e-41	depleted	ZRT2	Dal81-independent	Stp2-independent
C2_07700C_A	75.1578	-1.87502	0.327469	-5.7258	1.02949e-08	2.57803e-08	depleted	CAWG_05866	Dal81-independent	Stp2-independent
C2_07280W_A	31.5196	-1.87298	0.427942	-4.37671	1.20483e-05	2.38387e-05	depleted	CAWG_05824	Dal81-dependent	Stp2-dependent
CR_06790C_A	293.852	-1.87251	0.188392	-9.93944	2.80391e-23	1.45905e-22	depleted	CAWG_01978	Dal81-independent	Stp2-independent
C1_05680C_A	1370.34	-1.86895	0.142989	-13.0706	4.84843e-39	4.03253e-38	depleted	RIM1	Dal81-independent	Stp2-independent
C1_02770W_A	475.606	-1.86686	0.163931	-11.388	4.79644e-30	3.12055e-29	depleted	orf19.2965.1	Dal81-independent	Stp2-independent
C1_08130C_A	346.206	-1.8624	0.171591	-10.8537	1.91448e-27	1.15195e-26	depleted	TERT	Dal81-dependent	Stp2-independent
C6_02140W_A	413.603	-1.86181	0.170555	-10.9161	9.65057e-28	5.8478e-27	depleted	CAWG_05153	Dal81-dependent	Stp2-independent
CR_06160C_A	146.813	-1.86174	0.232573	-8.00497	1.19498e-15	4.43501e-15	depleted	DAD3	Dal81-independent	Stp2-independent
C2_10300C_A	158.406	-1.86086	0.2218	-8.38981	4.86943e-17	1.92755e-16	depleted	CAWG_06101	Dal81-independent	Stp2-independent
CR_06380C_A	218.887	-1.86023	0.199602	-9.31971	1.16653e-20	5.48554e-20	depleted	orf19.727	Dal81-independent	Stp2-independent
C1_04210C_A	1716.99	-1.86005	0.13716	-13.5611	6.81105e-42	6.15043e-41	depleted	CDC3	Dal81-dependent	Stp2-dependent
C6_03540W_A	1421.3	-1.85716	0.171699	-10.8163	2.88076e-27	1.71958e-26	depleted	CAWG_05016	Dal81-dependent	Stp2-dependent
C2_03160C_A	4613.63	-1.85474	0.125498	-14.779	2.00194e-49	2.26824e-48	depleted	RNR1	Dal81-independent	Stp2-independent
CR_03520C_A	1388.98	-1.85278	0.127567	-14.5239	8.54415e-48	9.12947e-47	depleted	CAWG_01687	Dal81-dependent	Stp2-dependent
C2_06670C_A	335.985	-1.84635	0.167583	-11.0175	3.14563e-28	1.93739e-27	depleted	DBF2	Dal81-independent	Stp2-independent
C4_05380C_A	201.131	-1.84418	0.204719	-9.00833	2.09208e-19	9.3059e-19	depleted	CAWG_00828	Dal81-independent	Stp2-dependent
C4_03120C_A	451.905	-1.84041	0.152545	-12.0647	1.62268e-33	1.15316e-32	depleted	BUB1	Dal81-independent	Stp2-independent
C3_01100W_A	103.377	-1.8397	0.316786	-5.8074	6.345e-09	1.61107e-08	depleted	CAWG_02444	Dal81-independent	Stp2-independent
C1_11730W_A	627.393	-1.83924	0.136925	-13.4324	3.90587e-41	3.4543e-40	depleted	CAWG_00264	Dal81-dependent	Stp2-dependent
C2_04440W_A	18.1645	-1.83474	0.634258	-2.89274	0.003819	0.00585626	depleted	CAWG_04200	Dal81-independent	Stp2-independent
CR_02180W_A	238.252	-1.83098	0.210273	-8.70766	3.10205e-18	1.30174e-17	depleted	PHO113	Dal81-independent	Stp2-independent
C2_02990C_A	1354.95	-1.8306	0.145665	-12.5672	3.19832e-36	2.46374e-35	depleted	HYU1	Dal81-independent	Stp2-independent
C2_10450W_A	390.888	-1.82658	0.204916	-8.91381	4.93092e-19	2.15503e-18	depleted	NCE4	Dal81-independent	Stp2-independent
C4_04780W_A	1801.44	-1.82484	0.124547	-14.6518	1.31186e-48	1.44016e-47	depleted	PMT6	Dal81-independent	Stp2-independent
CR_01590C_A	2379.03	-1.82459	0.11722	-15.5655	1.24934e-54	1.64164e-53	depleted	TRP2	Dal81-dependent	Stp2-dependent
C1_08440C_A	98.9193	-1.82381	0.271754	-6.71124	1.92973e-11	5.73382e-11	depleted	CAWG_00582	Dal81-independent	Stp2-dependent
C4_04230W_A	213.709	-1.82169	0.224123	-8.12809	4.361e-16	1.65014e-15	depleted	CAWG_03384	Dal81-independent	Stp2-independent
C1_02630C_A	107.269	-1.81341	0.274204	-6.61336	3.757e-11	1.09306e-10	depleted	EXG2	Dal81-dependent	Stp2-dependent
C4_04430W_A	490.904	-1.81057	0.14904	-12.1482	5.86492e-34	4.22795e-33	depleted	MRP8	Dal81-independent	Stp2-independent
C6_01750C_A	167.328	-1.80871	0.224197	-8.06749	7.17608e-16	2.69159e-15	depleted	CAWG_05192	Dal81-independent	Stp2-independent
CR_02810W_A	391.717	-1.8077	0.188039	-9.61344	7.01624e-22	3.47341e-21	depleted	CIRT4B	Dal81-independent	Stp2-independent
C2_01950C_A	222.094	-1.80753	0.240691	-7.50975	5.924e-14	2.01779e-13	depleted	AMN1	Dal81-independent	Stp2-independent
CR_03290C_A	28.5034	-1.80587	0.480946	-3.75484	0.000173451	0.000308067	depleted	IME2	Dal81-dependent	Stp2-dependent
C2_06550W_A	133.028	-1.80356	0.26668	-6.76301	1.35152e-11	4.04983e-11	depleted	CAWG_04394	Dal81-dependent	Stp2-independent
C4_05940W_A	155.746	-1.80247	0.242293	-7.43919	1.01302e-13	3.40985e-13	depleted	PPS1	Dal81-independent	Stp2-independent
CR_01610C_A	1565.7	-1.80126	0.118198	-15.2393	1.93832e-52	2.39992e-51	depleted	SHP1	Dal81-independent	Stp2-independent
C3_04340W_A	3369.6	-1.80073	0.122065	-14.7523	2.97515e-49	3.36456e-48	depleted	ATF1	Dal81-dependent	Stp2-dependent
C6_02190C_A	576.661	-1.79986	0.188041	-9.57163	1.05232e-21	5.17543e-21	depleted	CAWG_05148	Dal81-independent	Stp2-independent
C4_02440C_A	1634.02	-1.79692	0.216474	-8.30088	1.03344e-16	4.03236e-16	depleted	PGA38	Dal81-independent	Stp2-independent
C1_14230C_A	620.811	-1.79433	0.16551	-10.8412	2.19571e-27	1.31984e-26	depleted	IRR1	Dal81-independent	Stp2-independent
C1_03000W_A	143.35	-1.79337	0.241098	-7.43832	1.0197e-13	3.43043e-13	depleted	HOL1	Dal81-independent	Stp2-independent
C1_01750W_A	577.552	-1.79201	0.177667	-10.0864	6.34806e-24	3.40358e-23	depleted	CAWG_01205	Dal81-independent	Stp2-independent
C3_04970C_A	831.935	-1.79093	0.136214	-13.1478	1.75089e-39	1.4767e-38	depleted	orf19.5965	Dal81-dependent	Stp2-dependent
CR_03890W_A	131.851	-1.79007	0.239047	-7.48834	6.97483e-14	2.36766e-13	depleted	WOR3	Dal81-dependent	Stp2-dependent
C3_01550C_A	4806.44	-1.78904	0.12788	-13.99	1.79498e-44	1.74981e-43	depleted	TOS1	Dal81-independent	Stp2-independent
C4_02080W_A	197.265	-1.78751	0.207265	-8.6243	6.44854e-18	2.65411e-17	depleted	CAWG_03586	Dal81-dependent	Stp2-independent
C3_02010C_A	59.2824	-1.78447	0.339896	-5.25005	1.52055e-07	3.51189e-07	depleted	CAWG_02529	Dal81-independent	Stp2-independent
C2_08430C_A	14.1992	-1.78433	0.728037	-2.45087	0.014251	0.0202598	depleted	PGA46	Dal81-dependent	Stp2-dependent
C4_02600C_A	238.553	-1.7836	0.185019	-9.64008	5.41474e-22	2.68723e-21	depleted	CAWG_03531	Dal81-independent	Stp2-dependent
C5_05450C_A	926.817	-1.78286	0.19233	-9.26981	1.86477e-20	8.69405e-20	depleted	MUM2	Dal81-independent	Stp2-independent
C4_04210C_A	104.137	-1.7802	0.307843	-5.78282	7.34588e-09	1.85891e-08	depleted	SOH1	Dal81-independent	Stp2-independent
C3_04650W_A	55.822	-1.77793	0.335291	-5.30264	1.14138e-07	2.66692e-07	depleted	CAWG_02778	Dal81-dependent	Stp2-dependent
C6_02880W_A	348.81	-1.77677	0.202316	-8.78214	1.60393e-18	6.83577e-18	depleted	CAWG_05083	Dal81-independent	Stp2-independent
C3_06400C_A	327.274	-1.77449	0.193589	-9.16627	4.89663e-20	2.23606e-19	depleted	CAWG_02951	Dal81-independent	Stp2-independent
C1_11210C_A	1366.93	-1.77093	0.141564	-12.5097	6.6081e-36	5.02936e-35	depleted	HAP43	Dal81-independent	Stp2-independent
C3_00140W_A	1536.15	-1.77029	0.133914	-13.2196	6.76673e-40	5.76372e-39	depleted	orf19.5462	Dal81-independent	Stp2-independent
C4_02460W_A	308.841	-1.76886	0.174121	-10.1588	3.02804e-24	1.64555e-23	depleted	CAWG_03549	Dal81-dependent	Stp2-dependent
C1_10010C_A	742.146	-1.76829	0.139297	-12.6944	6.3533e-37	5.01334e-36	depleted	SWE1	Dal81-independent	Stp2-independent
C2_08390W_A	942.272	-1.76796	0.144768	-12.2124	2.67051e-34	1.93676e-33	depleted	CAWG_05925	Dal81-dependent	Stp2-dependent
C6_00400C_A	180.035	-1.76594	0.230818	-7.65077	1.99778e-14	6.94653e-14	depleted	CAWG_05318	Dal81-independent	Stp2-independent
C2_03440W_A	666.013	-1.76364	0.14006	-12.592	2.33568e-36	1.81446e-35	depleted	PGA33	Dal81-independent	Stp2-independent
C5_02640W_A	162.074	-1.76317	0.227426	-7.75273	8.99388e-15	3.19954e-14	depleted	CAWG_04646	Dal81-independent	Stp2-independent
C1_06270W_A	159.561	-1.76209	0.241289	-7.30281	2.81816e-13	9.27291e-13	depleted	CAWG_00782	Dal81-dependent	Stp2-dependent
CR_10530W_A	354.775	-1.76202	0.190764	-9.23665	2.54327e-20	1.1766e-19	depleted	CAWG_02311	Dal81-independent	Stp2-independent
C2_04970W_A	70.2694	-1.76169	0.349864	-5.03536	4.76951e-07	1.0589e-06	depleted	ABP2	Dal81-dependent	Stp2-dependent
C1_07350C_A	314.349	-1.75884	0.187663	-9.3723	7.09721e-21	3.37173e-20	depleted	GPX3	Dal81-dependent	Stp2-dependent
C1_13710C_A	102.637	-1.75564	0.287138	-6.11429	9.6989e-10	2.59661e-09	depleted	DAD1	Dal81-independent	Stp2-independent
C2_03530W_A	299.506	-1.75496	0.199448	-8.79911	1.37907e-18	5.91102e-18	depleted	CAWG_04119	Dal81-dependent	Stp2-dependent
C3_02060W_A	262.177	-1.75494	0.205606	-8.53542	1.39649e-17	5.66235e-17	depleted	CAWG_02533	Dal81-dependent	Stp2-dependent
CR_08140W_A	8.27346	-1.75427	0.838033	-2.09332	0.0363206	0.0489464	depleted	snR65	Dal81-dependent	Stp2-dependent
C5_02270W_A	5368.87	-1.75193	0.122646	-14.2845	2.73474e-46	2.81682e-45	depleted	THR4	Dal81-dependent	Stp2-dependent
C1_07490C_A	378.081	-1.75152	0.165103	-10.6086	2.71659e-26	1.56706e-25	depleted	CAWG_00671	Dal81-independent	Stp2-independent
C3_03480C_A	1597.95	-1.74957	0.136461	-12.821	1.25021e-37	9.99667e-37	depleted	ALT1	Dal81-independent	Stp2-independent
CR_03800C_A	158.058	-1.7481	0.216007	-8.09281	5.83043e-16	2.19372e-15	depleted	PPH3	Dal81-dependent	Stp2-independent
C4_02070W_A	146.816	-1.7455	0.235369	-7.41601	1.207e-13	4.04466e-13	depleted	PHO114	Dal81-dependent	Stp2-dependent
C6_03340C_A	2601.75	-1.7395	0.128868	-13.4983	1.60044e-41	1.43015e-40	depleted	GLC3	Dal81-dependent	Stp2-independent
C2_10600W_A	240.041	-1.73765	0.205997	-8.43531	3.30323e-17	1.32151e-16	depleted	CAWG_06122	Dal81-independent	Stp2-independent
C7_01300C_A	117.567	-1.73619	0.305915	-5.67541	1.38356e-08	3.44028e-08	depleted	PSF1	Dal81-independent	Stp2-dependent
CR_07150W_A	4360.38	-1.73544	0.111305	-15.5917	8.28512e-55	1.09345e-53	depleted	GLK1	Dal81-dependent	Stp2-dependent
C2_07860W_A	598.528	-1.73433	0.140403	-12.3525	4.71941e-35	3.50743e-34	depleted	CAWG_05880	Dal81-dependent	Stp2-dependent
C1_06780W_A	1075.58	-1.73382	0.171545	-10.1071	5.13791e-24	2.76214e-23	depleted	NPR1	Dal81-dependent	Stp2-dependent
C2_03020C_A	1325.1	-1.73272	0.147954	-11.7112	1.11717e-31	7.57179e-31	depleted	CAWG_04069	Dal81-independent	Stp2-independent
CR_04590C_A	2814.05	-1.73251	0.111981	-15.4715	5.40147e-54	6.97545e-53	depleted	PDX3	Dal81-dependent	Stp2-dependent
CR_00090C_A	975.089	-1.72923	0.143976	-12.0105	3.12994e-33	2.21121e-32	depleted	CAWG_01370	Dal81-independent	Stp2-independent
C2_08380C_A	390.866	-1.72668	0.174224	-9.91066	3.74167e-23	1.94198e-22	depleted	CAWG_05924	Dal81-independent	Stp2-independent
C1_12080W_A	335.037	-1.72589	0.169015	-10.2114	1.76242e-24	9.62998e-24	depleted	LCB4	Dal81-dependent	Stp2-independent
C4_07250C_A	465.915	-1.72504	0.154607	-11.1576	6.57458e-29	4.1471e-28	depleted	TLO10	Dal81-independent	Stp2-independent
CR_02260C_A	185.372	-1.72354	0.215889	-7.98343	1.42328e-15	5.26928e-15	depleted	CAWG_01570	Dal81-dependent	Stp2-independent
C2_09600C_A	550.62	-1.72125	0.139494	-12.3393	5.56366e-35	4.1145e-34	depleted	CAWG_06033	Dal81-independent	Stp2-independent
C3_03090W_A	249.287	-1.72005	0.196962	-8.73293	2.48168e-18	1.04799e-17	depleted	USO5	Dal81-independent	Stp2-independent
C5_03780C_A	284.516	-1.71995	0.192355	-8.94157	3.8367e-19	1.6891e-18	depleted	CAWG_04750	Dal81-independent	Stp2-independent
C1_07900W_A	2733.6	-1.71911	0.121003	-14.2072	8.26444e-46	8.36897e-45	depleted	COI1	Dal81-independent	Stp2-independent
C4_03990C_A	183.159	-1.71691	0.245611	-6.99034	2.74221e-12	8.49249e-12	depleted	orf19.1208	Dal81-independent	Stp2-independent
C1_14040W_A	537.284	-1.71667	0.173619	-9.88757	4.71322e-23	2.43571e-22	depleted	CAWG_00049	Dal81-dependent	Stp2-dependent
C3_06480C_A	1385.44	-1.7164	0.143811	-11.9351	7.76293e-33	5.42682e-32	depleted	ECM15	Dal81-dependent	Stp2-dependent
C3_02360C_A	114.023	-1.71502	0.285512	-6.00681	1.89211e-09	4.98338e-09	depleted	CAWG_02561	Dal81-independent	Stp2-independent
C2_01300C_A	523.337	-1.71343	0.169014	-10.1378	3.75541e-24	2.03531e-23	depleted	MNN24	Dal81-independent	Stp2-independent
C1_08570C_A	227.952	-1.7121	0.184785	-9.26534	1.94453e-20	9.05185e-20	depleted	PCL2	Dal81-independent	Stp2-dependent
C2_03260W_A	432.628	-1.70867	0.164959	-10.3582	3.84199e-25	2.14615e-24	depleted	CAWG_04093	Dal81-dependent	Stp2-dependent
C4_07080C_A	422.133	-1.70793	0.163346	-10.4559	1.37646e-25	7.77577e-25	depleted	CAWG_03120	Dal81-independent	Stp2-independent
C1_11400C_A	912.152	-1.70716	0.138336	-12.3407	5.4654e-35	4.05182e-34	depleted	GIN4	Dal81-independent	Stp2-independent
C1_08060W_A	1285.83	-1.70581	0.163829	-10.4121	2.18353e-25	1.22543e-24	depleted	OFR1	Dal81-dependent	Stp2-dependent
CR_07860C_A	252.673	-1.70579	0.181917	-9.37677	6.80225e-21	3.23673e-20	depleted	ASF1	Dal81-independent	Stp2-independent
C2_06210C_A	3771.77	-1.7022	0.110895	-15.3496	3.56448e-53	4.51577e-52	depleted	SER1	Dal81-independent	Stp2-independent
C1_09870W_A	182.662	-1.70096	0.232488	-7.31636	2.54788e-13	8.41121e-13	depleted	HCM1	Dal81-independent	Stp2-independent
C3_06640W_A	123.54	-1.69989	0.268291	-6.33599	2.3582e-10	6.59878e-10	depleted	CAWG_02974	Dal81-independent	Stp2-independent
C3_07110W_A	210.016	-1.69989	0.187215	-9.07988	1.08692e-19	4.88181e-19	depleted	orf19.6789	Dal81-independent	Stp2-independent
C6_03990C_A	169.657	-1.69975	0.231369	-7.3465	2.0347e-13	6.74305e-13	depleted	CAWG_04977	Dal81-independent	Stp2-independent
CR_05490W_A	186.197	-1.69799	0.219202	-7.74626	9.46415e-15	3.36285e-14	depleted	SUA72	Dal81-dependent	Stp2-independent
C4_07000W_A	33.4936	-1.69785	0.469011	-3.62006	0.000294532	0.000510438	depleted	CAWG_03128	Dal81-independent	Stp2-independent
CR_03010C_A	243.903	-1.69568	0.177472	-9.55466	1.23984e-21	6.06786e-21	depleted	ERV1	Dal81-dependent	Stp2-dependent
C2_10660W_A	1004.57	-1.69535	0.147807	-11.47	1.866e-30	1.22866e-29	depleted	ASH1	Dal81-independent	Stp2-independent
C3_07850W_A	554.895	-1.69064	0.153172	-11.0375	2.51806e-28	1.55565e-27	depleted	CAWG_03091	Dal81-independent	Stp2-independent
C1_08980C_A	2613.96	-1.68785	0.133747	-12.6197	1.64388e-36	1.28201e-35	depleted	ZWF1	Dal81-independent	Stp2-independent
C1_05740C_A	105.907	-1.68729	0.276435	-6.10372	1.03626e-09	2.76936e-09	depleted	CAWG_00832	Dal81-independent	Stp2-independent
CR_05040W_A	101.384	-1.68578	0.289517	-5.82272	5.78963e-09	1.47504e-08	depleted	CAWG_01838	Dal81-dependent	Stp2-dependent
C7_02140W_A	142.781	-1.68555	0.228614	-7.37291	1.66942e-13	5.56012e-13	depleted	CAWG_05564	Dal81-dependent	Stp2-dependent
C2_06740W_A	278.14	-1.68118	0.196869	-8.53957	1.34722e-17	5.48108e-17	depleted	CAWG_05773	Dal81-dependent	Stp2-independent
C1_12060C_A	134.668	-1.68058	0.232537	-7.22715	4.93243e-13	1.60364e-12	depleted	CAWG_00236	Dal81-independent	Stp2-independent
C5_03210C_A	54.8448	-1.67912	0.380179	-4.41667	1.00233e-05	1.9937e-05	depleted	orf19.2657	Dal81-dependent	Stp2-dependent
C6_04210C_A	617.252	-1.67684	0.192935	-8.69122	3.58557e-18	1.49835e-17	depleted	ATM1	Dal81-independent	Stp2-independent
C2_04330C_A	302.332	-1.6768	0.196756	-8.52222	1.56528e-17	6.32537e-17	depleted	CAWG_04189	Dal81-independent	Stp2-independent
C1_06550W_A	7129.6	-1.67593	0.134681	-12.4437	1.51418e-35	1.13943e-34	depleted	GLT1	Dal81-independent	Stp2-independent
C1_00790W_A	41.8407	-1.67231	0.463249	-3.60996	0.000306242	0.000529508	depleted	CAWG_01295	Dal81-dependent	Stp2-dependent
CR_04030W_A	472.156	-1.6702	0.162905	-10.2526	1.15214e-24	6.34151e-24	depleted	NIP100	Dal81-dependent	Stp2-dependent
C2_02620W_A	415.092	-1.66971	0.188425	-8.86137	7.90337e-19	3.4267e-18	depleted	CAWG_04030	Dal81-independent	Stp2-independent
C5_04410C_A	148.589	-1.66756	0.243469	-6.84916	7.42846e-12	2.25863e-11	depleted	CAWG_04813	Dal81-dependent	Stp2-dependent
C2_05250C_A	5073.08	-1.66468	0.119781	-13.8976	6.54644e-44	6.32016e-43	depleted	AAT1	Dal81-dependent	Stp2-dependent
C2_07730W_A	1108.77	-1.6642	0.126839	-13.1205	2.51321e-39	2.10779e-38	depleted	YVC1	Dal81-dependent	Stp2-dependent
C1_05030C_A	285.76	-1.66127	0.182049	-9.12543	7.14514e-20	3.23092e-19	depleted	PSF2	Dal81-independent	Stp2-independent
C1_02100W_A	101.531	-1.66095	0.284327	-5.84171	5.16669e-09	1.32194e-08	depleted	CAWG_01173	Dal81-independent	Stp2-independent
C4_06110C_A	6104.11	-1.65879	0.121828	-13.6158	3.22405e-42	2.93785e-41	depleted	TRP5	Dal81-dependent	Stp2-dependent
C6_00120W_A	63.1093	-1.65721	0.342819	-4.83406	1.33773e-06	2.85165e-06	depleted	CAWG_05345	Dal81-independent	Stp2-dependent
CR_06700C_A	1304.39	-1.6565	0.121189	-13.6687	1.56096e-42	1.43766e-41	depleted	SOL3	Dal81-independent	Stp2-independent
C6_03860C_A	28.3486	-1.65565	0.515843	-3.2096	0.0013292	0.00213819	depleted	PGA61	Dal81-independent	Stp2-independent
C1_02940C_A	439.599	-1.65563	0.181454	-9.12425	7.22378e-20	3.26402e-19	depleted	CAWG_01090	Dal81-independent	Stp2-independent
C7_00190W_A	732.253	-1.65072	0.132207	-12.4859	8.91392e-36	6.73309e-35	depleted	CAWG_05376	Dal81-independent	Stp2-independent
CR_01860W_A	134.895	-1.64903	0.257902	-6.39404	1.61556e-10	4.54826e-10	depleted	OPT9	Dal81-dependent	Stp2-dependent
C2_06100W_A	2384.02	-1.64902	0.119424	-13.8081	2.27645e-43	2.15616e-42	depleted	PMT4	Dal81-independent	Stp2-dependent
C6_03270C_A	858.838	-1.64033	0.166028	-9.87987	5.08983e-23	2.62807e-22	depleted	AYR2	Dal81-dependent	Stp2-independent
C4_06190C_A	372.209	-1.63738	0.18322	-8.93671	4.00912e-19	1.76114e-18	depleted	MPH1	Dal81-independent	Stp2-independent
CR_09610C_A	485.701	-1.63731	0.177025	-9.24902	2.26552e-20	1.04972e-19	depleted	CAWG_02227	Dal81-independent	Stp2-dependent
C2_01980C_A	581.149	-1.63673	0.172673	-9.4788	2.57222e-21	1.24767e-20	depleted	SRD1	Dal81-independent	Stp2-independent
C3_00900C_A	492.032	-1.62986	0.171269	-9.51639	1.79303e-21	8.71129e-21	depleted	AYR1	Dal81-dependent	Stp2-dependent
C1_08480C_A	333.264	-1.62925	0.164709	-9.89171	4.52249e-23	2.33915e-22	depleted	APS3	Dal81-independent	Stp2-independent
C2_07770C_A	17.27	-1.62914	0.619895	-2.62809	0.00858666	0.0126009	depleted	orf19.2203.1	Dal81-dependent	Stp2-dependent
CR_09330C_A	2120.19	-1.62893	0.124777	-13.0547	5.97454e-39	4.96226e-38	depleted	CAWG_02203	Dal81-dependent	Stp2-dependent
C1_01140C_A	1571.61	-1.6208	0.173096	-9.36354	7.71056e-21	3.65734e-20	depleted	CAWG_01261	Dal81-independent	Stp2-dependent
C1_02370C_A	474.725	-1.61994	0.160315	-10.1047	5.26384e-24	2.82731e-23	depleted	CAWG_01147	Dal81-independent	Stp2-independent
C3_01500C_A	959.002	-1.61911	0.139585	-11.5995	4.14726e-31	2.77331e-30	depleted	BZZ1	Dal81-independent	Stp2-independent
C1_05020C_A	647.266	-1.61769	0.15784	-10.249	1.19617e-24	6.57181e-24	depleted	ARG2	Dal81-dependent	Stp2-dependent
C3_03370C_A	976.909	-1.61738	0.203521	-7.94698	1.91111e-15	7.04496e-15	depleted	CAWG_02659	Dal81-dependent	Stp2-dependent
C2_09750W_A	3444.21	-1.61693	0.137633	-11.7481	7.21855e-32	4.92025e-31	depleted	LEU42	Dal81-independent	Stp2-independent
C2_07490W_A	2437.56	-1.61658	0.13859	-11.6645	1.93609e-31	1.30047e-30	depleted	HEM15	Dal81-independent	Stp2-independent
C7_02770W_A	770.202	-1.61546	0.174507	-9.2573	2.09666e-20	9.75249e-20	depleted	CHS1	Dal81-independent	Stp2-independent
C4_05920C_A	222.99	-1.61424	0.182648	-8.83797	9.74725e-19	4.21702e-18	depleted	PGA49	Dal81-independent	Stp2-independent
C1_14580C_A	450.77	-1.61357	0.206401	-7.81762	5.38294e-15	1.93792e-14	depleted	CAWG_05355	Dal81-independent	Stp2-independent
C1_14310W_A	773.213	-1.61201	0.174264	-9.2504	2.23651e-20	1.03709e-19	depleted	CAWG_00023	Dal81-independent	Stp2-independent
C4_05340W_A	280.131	-1.61027	0.196389	-8.1994	2.41588e-16	9.25214e-16	depleted	CAWG_03280	Dal81-independent	Stp2-independent
C2_08750W_A	36.1248	-1.60833	0.442563	-3.63412	0.000278928	0.000485637	depleted	CAWG_05959	Dal81-independent	Stp2-independent
C4_05570C_A	218.049	-1.60806	0.189107	-8.50341	1.84105e-17	7.42979e-17	depleted	TUB4	Dal81-independent	Stp2-independent
C3_05270C_A	265.224	-1.60804	0.1962	-8.19595	2.48616e-16	9.51523e-16	depleted	HGT5	Dal81-dependent	Stp2-dependent
CR_00020W_A	603.469	-1.60762	0.156668	-10.2613	1.05229e-24	5.80258e-24	depleted	TLO1	Dal81-independent	Stp2-independent
C1_04220C_A	380.49	-1.60697	0.203879	-7.88197	3.22252e-15	1.17565e-14	depleted	CAWG_00971	Dal81-independent	Stp2-independent
CR_04500C_A	1359.69	-1.60461	0.168058	-9.548	1.32219e-21	6.46034e-21	depleted	CAWG_01785	Dal81-dependent	Stp2-dependent
C2_00260C_A	1175.97	-1.60451	0.131536	-12.1983	3.17483e-34	2.29974e-33	depleted	MUQ1	Dal81-dependent	Stp2-dependent
C4_03080W_A	321.036	-1.60431	0.23947	-6.69941	2.09263e-11	6.20555e-11	depleted	CAWG_03492	Dal81-independent	Stp2-independent
CR_00410W_A	196.702	-1.59921	0.209244	-7.64279	2.12557e-14	7.38232e-14	depleted	RTT109	Dal81-independent	Stp2-independent
C4_00060W_A	734.298	-1.59356	0.137444	-11.5942	4.40781e-31	2.94426e-30	depleted	CAWG_03778	Dal81-independent	Stp2-independent
C3_04420W_A	864.034	-1.58918	0.139512	-11.391	4.63475e-30	3.01862e-29	depleted	orf19.5892	Dal81-dependent	Stp2-dependent
C3_01440C_A	206.818	-1.5868	0.252288	-6.28964	3.18203e-10	8.82592e-10	depleted	CAWG_02476	Dal81-dependent	Stp2-dependent
CR_09210W_A	146.284	-1.58491	0.233955	-6.77439	1.24933e-11	3.7511e-11	depleted	SUC1	Dal81-dependent	Stp2-dependent
C6_01900C_A	298.972	-1.58369	0.179162	-8.83942	9.622e-19	4.16583e-18	depleted	DOG1	Dal81-independent	Stp2-independent
C6_03960W_A	1752.26	-1.58179	0.122654	-12.8964	4.71567e-38	3.81639e-37	depleted	CAWG_04978	Dal81-dependent	Stp2-dependent
C2_00350W_A	569.177	-1.58013	0.152369	-10.3704	3.37964e-25	1.89317e-24	depleted	CAWG_03815	Dal81-independent	Stp2-independent
C1_00270W_A	86.3065	-1.57817	0.26785	-5.89198	3.81591e-09	9.84302e-09	depleted	CAWG_03692	Dal81-independent	Stp2-independent
C2_01910W_A	190.179	-1.57797	0.251516	-6.27383	3.52277e-10	9.73504e-10	depleted	CAWG_03959	Dal81-dependent	Stp2-dependent
CR_04680C_A	19.5302	-1.57772	0.543433	-2.90324	0.00369319	0.00567638	depleted	CAWG_01803	Dal81-dependent	Stp2-dependent
C3_04350C_A	139.288	-1.57753	0.275718	-5.72154	1.05566e-08	2.64134e-08	depleted	CAWG_02747	Dal81-independent	Stp2-independent
C3_03810W_A	831.816	-1.57139	0.132291	-11.8783	1.53506e-32	1.06444e-31	depleted	RAD53	Dal81-independent	Stp2-independent
C2_10470C_A	424.591	-1.5702	0.155704	-10.0845	6.46914e-24	3.4654e-23	depleted	CAWG_06113	Dal81-independent	Stp2-independent
C1_13510C_A	336.46	-1.56825	0.172009	-9.11727	7.70382e-20	3.47831e-19	depleted	TGL99	Dal81-independent	Stp2-independent
C6_00880W_A	444.474	-1.56776	0.155035	-10.1123	4.87425e-24	2.62982e-23	depleted	PEX7	Dal81-dependent	Stp2-independent
C1_01270W_A	431.621	-1.56514	0.170436	-9.18314	4.18686e-20	1.92071e-19	depleted	CTA9	Dal81-independent	Stp2-independent
C1_03080C_A	92.1405	-1.56385	0.278046	-5.62444	1.86109e-08	4.58778e-08	depleted	TEM1	Dal81-independent	Stp2-independent
CR_06600C_A	94.4823	-1.56165	0.260047	-6.00526	1.91028e-09	5.02905e-09	depleted	snR5d	Dal81-independent	Stp2-independent
C1_02680C_A	213.803	-1.55777	0.205601	-7.57667	3.54527e-14	1.21862e-13	depleted	MNN44	Dal81-dependent	Stp2-independent
C1_09660W_A	1105.24	-1.55745	0.124445	-12.5151	6.17143e-36	4.70298e-35	depleted	DOA1	Dal81-independent	Stp2-independent
C2_01540W_A	272.66	-1.55731	0.192478	-8.09081	5.92684e-16	2.2286e-15	depleted	CAWG_03926	Dal81-dependent	Stp2-dependent
C1_09300C_A	192.74	-1.55693	0.240872	-6.46372	1.02157e-10	2.9046e-10	depleted	CAWG_00499	Dal81-dependent	Stp2-dependent
CR_07580C_A	292.729	-1.55584	0.182789	-8.51168	1.71436e-17	6.92314e-17	depleted	TSC11	Dal81-independent	Stp2-independent
C2_09700W_A	143.21	-1.55569	0.232254	-6.69823	2.10955e-11	6.25263e-11	depleted	YEA4	Dal81-independent	Stp2-independent
CR_01430W_A	301.32	-1.5552	0.173177	-8.98041	2.69763e-19	1.19361e-18	depleted	CAWG_01495	Dal81-dependent	Stp2-dependent
C6_02560W_A	1018.66	-1.55487	0.125526	-12.3868	3.08076e-35	2.30099e-34	depleted	CAWG_05112	Dal81-independent	Stp2-independent
C6_02590C_A	453.919	-1.55452	0.154742	-10.0459	9.5745e-24	5.07009e-23	depleted	MOB1	Dal81-independent	Stp2-independent
C2_10870W_A	583.494	-1.55349	0.154169	-10.0765	7.01568e-24	3.74482e-23	depleted	orf19.5370	Dal81-independent	Stp2-independent
C4_07200C_A	494.177	-1.54945	0.146608	-10.5686	4.16601e-26	2.38939e-25	depleted	CAWG_03110	Dal81-dependent	Stp2-dependent
CR_06770C_A	814.873	-1.54707	0.131791	-11.7388	8.05946e-32	5.47478e-31	depleted	orf19.1857	Dal81-dependent	Stp2-independent
C3_03380W_A	325.853	-1.54558	0.191468	-8.07225	6.90165e-16	2.59028e-15	depleted	CAWG_02658	Dal81-independent	Stp2-independent
C3_04780C_A	690.134	-1.54495	0.138266	-11.1737	5.48338e-29	3.47338e-28	depleted	CAWG_02791	Dal81-dependent	Stp2-dependent
CR_06050W_A	608.523	-1.5443	0.173611	-8.89521	5.83086e-19	2.54095e-18	depleted	CDC28	Dal81-independent	Stp2-independent
C4_05070C_A	1617.1	-1.54313	0.189147	-8.15839	3.39517e-16	1.29365e-15	depleted	ARG8	Dal81-dependent	Stp2-dependent
C1_09650W_A	1161.84	-1.54285	0.160694	-9.6012	7.90225e-22	3.90239e-21	depleted	CAWG_00465	Dal81-dependent	Stp2-dependent
C5_02780W_A	384.434	-1.54181	0.18923	-8.14781	3.70578e-16	1.40932e-15	depleted	CAWG_04661	Dal81-independent	Stp2-independent
C3_03360W_A	742.567	-1.54135	0.156846	-9.82716	8.60094e-23	4.40312e-22	depleted	FCY2	Dal81-independent	Stp2-independent
CR_05960W_A	93.7047	-1.54131	0.277078	-5.56273	2.6558e-08	6.4515e-08	depleted	orf19.458.1	Dal81-independent	Stp2-independent
C1_05990C_A	533.633	-1.54102	0.165661	-9.30228	1.37464e-20	6.43893e-20	depleted	CAWG_00808	Dal81-independent	Stp2-independent
C6_00660C_A	371.985	-1.5397	0.168098	-9.15959	5.20972e-20	2.37363e-19	depleted	CAWG_05292	Dal81-independent	Stp2-independent
C2_08240W_A	897.918	-1.53788	0.15547	-9.89181	4.51791e-23	2.3388e-22	depleted	ORF298	Dal81-independent	Stp2-independent
C1_12210W_A	1425.9	-1.53643	0.142964	-10.747	6.12034e-27	3.58562e-26	depleted	TRP3	Dal81-dependent	Stp2-dependent
C3_05080W_A	52.9935	-1.53481	0.337657	-4.54547	5.48116e-06	1.11423e-05	depleted	CAWG_02820	Dal81-dependent	Stp2-dependent
C2_00060C_A	1568.94	-1.53283	0.1243	-12.3317	6.11563e-35	4.51159e-34	depleted	CAWG_03786	Dal81-independent	Stp2-independent
C3_06340W_A	110.25	-1.53052	0.261221	-5.85907	4.65458e-09	1.19455e-08	depleted	HNT2	Dal81-dependent	Stp2-dependent
C3_05210C_A	704.062	-1.52919	0.139694	-10.9467	6.89002e-28	4.1962e-27	depleted	DYN1	Dal81-dependent	Stp2-dependent
C3_01180C_A	621.711	-1.52575	0.136168	-11.2049	3.85588e-29	2.45541e-28	depleted	CAWG_02452	Dal81-independent	Stp2-independent
C4_06260W_A	224.003	-1.52507	0.18794	-8.11468	4.87061e-16	1.8395e-15	depleted	PGA43	Dal81-independent	Stp2-independent
C7_03830C_A	681.859	-1.52299	0.139001	-10.9567	6.17109e-28	3.77366e-27	depleted	CAWG_05713	Dal81-independent	Stp2-independent
C2_09290W_A	131.988	-1.52065	0.248266	-6.12508	9.06362e-10	2.43521e-09	depleted	CAWG_06006	Dal81-independent	Stp2-independent
CR_02910W_A	679.011	-1.52053	0.162584	-9.3523	8.57648e-21	4.04888e-20	depleted	CAWG_01627	Dal81-independent	Stp2-independent
C2_00490W_A	611.503	-1.52011	0.141296	-10.7583	5.41326e-27	3.1838e-26	depleted	CAWG_03829	Dal81-independent	Stp2-independent
C4_06960W_A	347.067	-1.51948	0.194943	-7.79448	6.46757e-15	2.31867e-14	depleted	CAWG_03132	Dal81-dependent	Stp2-dependent
C1_02410C_A	403.306	-1.51929	0.18282	-8.31029	9.5466e-17	3.73955e-16	depleted	CAWG_01143	Dal81-independent	Stp2-dependent
C7_02150C_A	1467.74	-1.5185	0.167561	-9.06235	1.27675e-19	5.71303e-19	depleted	ECM42	Dal81-dependent	Stp2-dependent
C5_05390C_A	3724.39	-1.51802	0.139143	-10.9098	1.0345e-27	6.26226e-27	depleted	PGA4	Dal81-independent	Stp2-independent
CR_02170W_A	3081.02	-1.51782	0.106693	-14.2261	6.31075e-46	6.41219e-45	depleted	MET2	Dal81-independent	Stp2-independent
CR_02940C_A	265.169	-1.51567	0.224376	-6.75503	1.4281e-11	4.27077e-11	depleted	CAWG_01630	Dal81-dependent	Stp2-dependent
C2_07210C_A	1063.92	-1.51168	0.123282	-12.262	1.44829e-34	1.06061e-33	depleted	TPK2	Dal81-dependent	Stp2-dependent
C4_07110C_A	14635.8	-1.51165	0.108677	-13.9095	5.54422e-44	5.3612e-43	depleted	PDA1	Dal81-independent	Stp2-independent
C6_03310W_A	975.073	-1.51108	0.154036	-9.80996	1.02009e-22	5.19122e-22	depleted	CAWG_05039	Dal81-independent	Stp2-independent
C3_00600W_A	27.9982	-1.51	0.51473	-2.93357	0.00335084	0.00517669	depleted	IFF11	Dal81-independent	Stp2-independent
C6_02490C_A	413.73	-1.50818	0.195397	-7.71858	1.17631e-14	4.15271e-14	depleted	CAWG_05119	Dal81-independent	Stp2-independent
C2_07060W_A	710.252	-1.50799	0.16183	-9.31839	1.18118e-20	5.55005e-20	depleted	CAWG_05803	Dal81-independent	Stp2-independent
C3_00710W_A	677.419	-1.50623	0.138261	-10.8941	1.22932e-27	7.41917e-27	depleted	CHS8	Dal81-dependent	Stp2-dependent
C4_04150C_A	8805.94	-1.50606	0.117961	-12.7675	2.49138e-37	1.97632e-36	depleted	PDB1	Dal81-independent	Stp2-independent
C2_07870C_A	414.55	-1.50481	0.159012	-9.46347	2.97886e-21	1.44026e-20	depleted	CAWG_05881	Dal81-independent	Stp2-independent
C4_06580W_A	346.716	-1.50327	0.19636	-7.65566	1.92316e-14	6.69095e-14	depleted	CBF1	Dal81-independent	Stp2-independent
CR_04570C_A	1428.52	-1.5018	0.130363	-11.5201	1.04479e-30	6.90968e-30	depleted	CDC10	Dal81-dependent	Stp2-independent
C3_05090C_A	273.203	-1.50021	0.19879	-7.54673	4.46307e-14	1.53147e-13	depleted	CAWG_02821	Dal81-dependent	Stp2-dependent
CR_10250C_A	11043.4	-1.49383	0.167645	-8.91068	5.07187e-19	2.21503e-18	depleted	FDH3	Dal81-dependent	Stp2-dependent
C1_06920C_A	323.435	-1.49292	0.177397	-8.41571	3.90514e-17	1.55507e-16	depleted	CAWG_00723	Dal81-dependent	Stp2-dependent
C3_00790W_A	241.069	-1.49164	0.193707	-7.70047	1.35564e-14	4.75504e-14	depleted	CAWG_02415	Dal81-independent	Stp2-independent
CR_02200C_A	955.267	-1.49077	0.133445	-11.1714	5.63144e-29	3.55966e-28	depleted	RAD51	Dal81-independent	Stp2-independent
C2_03670W_A	127.745	-1.48963	0.287394	-5.18325	2.18056e-07	4.97502e-07	depleted	SAP99	Dal81-independent	Stp2-independent
C4_06860C_A	315.457	-1.48842	0.187722	-7.92883	2.21212e-15	8.10482e-15	depleted	orf19.3123.2	Dal81-independent	Stp2-independent
C1_09640W_A	5405.37	-1.48618	0.105064	-14.1454	1.99371e-45	1.99205e-44	depleted	ADE12	Dal81-independent	Stp2-independent
C4_02420C_A	124.876	-1.48578	0.252661	-5.88053	4.08945e-09	1.0535e-08	depleted	CAWG_03553	Dal81-independent	Stp2-independent
C1_13600W_A	37.1752	-1.48524	0.428659	-3.46485	0.000530526	0.000891762	depleted	CAWG_00092	Dal81-independent	Stp2-independent
CR_01320C_A	812.55	-1.48461	0.136316	-10.891	1.27298e-27	7.67493e-27	depleted	CAWG_01484	Dal81-independent	Stp2-independent
C1_00040W_A	1006.81	-1.48406	0.142428	-10.4197	2.01616e-25	1.13256e-24	depleted	CTA2	Dal81-independent	Stp2-independent
C2_07320W_A	1831.59	-1.48391	0.118384	-12.5347	4.81958e-36	3.68683e-35	depleted	ARP3	Dal81-dependent	Stp2-dependent
CR_02870W_A	710.487	-1.48228	0.14448	-10.2595	1.07303e-24	5.91149e-24	depleted	APL4	Dal81-dependent	Stp2-dependent
CR_00380W_A	18.055	-1.48039	0.600528	-2.46515	0.0136957	0.0195211	depleted	CAWG_01399	Dal81-independent	Stp2-independent
C2_02010C_A	134.242	-1.47823	0.219483	-6.73503	1.63896e-11	4.88676e-11	depleted	CHT4	Dal81-independent	Stp2-independent
C2_06280C_A	68.5326	-1.47819	0.331463	-4.4596	8.21134e-06	1.64693e-05	depleted	CAWG_04372	Dal81-independent	Stp2-independent
C2_06420C_A	1080.92	-1.47723	0.132964	-11.11	1.12191e-28	6.98866e-28	depleted	RTS1	Dal81-dependent	Stp2-dependent
C5_00330C_A	443.383	-1.47625	0.198232	-7.44709	9.54229e-14	3.21557e-13	depleted	CAWG_04428	Dal81-independent	Stp2-independent
C6_03610W_A	172.522	-1.47599	0.262273	-5.6277	1.82628e-08	4.50381e-08	depleted	FGR17	Dal81-independent	Stp2-independent
C6_00790C_A	1057.75	-1.47333	0.518934	-2.83914	0.00452355	0.00688565	depleted	CTR1	Dal81-dependent	Stp2-independent
C2_05290C_A	820.812	-1.47281	0.150707	-9.77267	1.47508e-22	7.45613e-22	depleted	CAWG_04280	Dal81-dependent	Stp2-dependent
C3_04450C_A	11.7755	-1.47112	0.690477	-2.13058	0.0331237	0.0449103	depleted	CAWG_02758	Dal81-independent	Stp2-independent
C2_09640W_A	1249.97	-1.46944	0.14369	-10.2265	1.50877e-24	8.28167e-24	depleted	PMI1	Dal81-independent	Stp2-independent
C7_02850W_A	531.014	-1.4685	0.155568	-9.43961	3.74181e-21	1.80189e-20	depleted	CAWG_05627	Dal81-independent	Stp2-dependent
C6_00840W_A	2735.16	-1.46787	0.170197	-8.62456	6.43392e-18	2.64991e-17	depleted	GPX2	Dal81-dependent	Stp2-independent
C3_07610W_A	873.535	-1.46691	0.139848	-10.4893	9.67462e-26	5.49112e-25	depleted	TIP120	Dal81-independent	Stp2-independent
CR_03680C_A	549.423	-1.46677	0.146578	-10.0067	1.42366e-23	7.45994e-23	depleted	SMC1	Dal81-independent	Stp2-independent
C1_10510W_A	179.128	-1.46672	0.203376	-7.21187	5.51877e-13	1.78846e-12	depleted	CAWG_00382	Dal81-independent	Stp2-independent
CR_00510C_A	2159.72	-1.46511	0.128721	-11.382	5.14006e-30	3.33327e-29	depleted	ADE1	Dal81-independent	Stp2-independent
C1_09730W_A	347.607	-1.46282	0.228629	-6.39825	1.57164e-10	4.42878e-10	depleted	DAM1	Dal81-independent	Stp2-independent
C4_03200C_A	371.313	-1.45913	0.16342	-8.92873	4.30935e-19	1.89026e-18	depleted	CAWG_03474	Dal81-independent	Stp2-dependent
C1_07160C_A	523.05	-1.45702	0.212879	-6.84436	7.68197e-12	2.33217e-11	depleted	CAWG_00700	Dal81-dependent	Stp2-dependent
C2_05510C_A	224.335	-1.45555	0.225905	-6.4432	1.16981e-10	3.31981e-10	depleted	CAWG_04299	Dal81-independent	Stp2-independent
C1_00710C_A	2760.25	-1.45473	0.124737	-11.6624	1.98371e-31	1.33097e-30	depleted	TUB2	Dal81-dependent	Stp2-dependent
C1_09470C_A	910.615	-1.45263	0.13141	-11.0542	2.09134e-28	1.29335e-27	depleted	CAWG_00482	Dal81-independent	Stp2-independent
C4_02690W_A	362.96	-1.45099	0.184599	-7.86022	3.83453e-15	1.38797e-14	depleted	CAWG_03529	Dal81-dependent	Stp2-dependent
CR_05500C_A	310.033	-1.44996	0.178281	-8.13299	4.18824e-16	1.58678e-15	depleted	CAWG_01873	Dal81-dependent	Stp2-dependent
C1_03680W_A	1416.87	-1.44932	0.149046	-9.72398	2.38274e-22	1.19436e-21	depleted	ENG1	Dal81-independent	Stp2-dependent
C1_07770W_A	112.387	-1.44898	0.234818	-6.17065	6.8009e-10	1.84127e-09	depleted	FGR6-3	Dal81-independent	Stp2-independent
C3_04830C_A	15572.3	-1.44595	0.113409	-12.7498	3.12433e-37	2.47188e-36	depleted	FAS2	Dal81-dependent	Stp2-independent
C1_00360W_A	181.325	-1.44544	0.229888	-6.28757	3.2247e-10	8.936e-10	depleted	CDC13	Dal81-independent	Stp2-independent
C2_09860C_A	172.432	-1.44449	0.249504	-5.78946	7.06137e-09	1.78842e-08	depleted	CAWG_06058	Dal81-independent	Stp2-independent
C3_03020W_A	611.702	-1.44338	0.154472	-9.34395	9.28033e-21	4.37428e-20	depleted	orf19.298	Dal81-independent	Stp2-independent
C4_02110W_A	389.103	-1.44329	0.163413	-8.83216	1.02672e-18	4.43559e-18	depleted	CAWG_03583	Dal81-independent	Stp2-independent
C3_03160C_A	184.519	-1.44242	0.277175	-5.20402	1.95023e-07	4.46648e-07	depleted	CAWG_02677	Dal81-independent	Stp2-independent
C1_01060W_A	4662.34	-1.44231	0.107464	-13.4213	4.53673e-41	4.00633e-40	depleted	MBF1	Dal81-independent	Stp2-independent
C4_02900C_A	721.331	-1.44175	0.137869	-10.4574	1.35511e-25	7.66235e-25	depleted	CRH11	Dal81-independent	Stp2-independent
C1_13950C_A	62.9926	-1.4415	0.368572	-3.91105	9.18974e-05	0.000166871	depleted	CAWG_00058	Dal81-independent	Stp2-independent
C3_02530W_A	349.991	-1.44061	0.199262	-7.22973	4.83942e-13	1.57425e-12	depleted	YSY6	Dal81-independent	Stp2-independent
C4_04710W_A	404.512	-1.44023	0.205655	-7.00315	2.50279e-12	7.77913e-12	depleted	GYP1	Dal81-dependent	Stp2-dependent
C1_13120C_A	600.573	-1.43999	0.162691	-8.85107	8.66832e-19	3.75564e-18	depleted	MON2	Dal81-independent	Stp2-dependent
C1_00950C_A	747.284	-1.43883	0.14994	-9.59599	8.31145e-22	4.09772e-21	depleted	CDC5	Dal81-independent	Stp2-independent
CR_03920C_A	1099.06	-1.43799	0.147663	-9.73834	2.06914e-22	1.04063e-21	depleted	TPO4	Dal81-dependent	Stp2-dependent
CR_05480W_A	2194.79	-1.43442	0.120747	-11.8795	1.51259e-32	1.05007e-31	depleted	CAWG_01871	Dal81-independent	Stp2-dependent
CR_01100C_A	167.259	-1.43335	0.229386	-6.24864	4.14035e-10	1.14154e-09	depleted	CAWG_01463	Dal81-independent	Stp2-independent
CR_08000C_A	3848.5	-1.4329	0.108325	-13.2278	6.06746e-40	5.1828e-39	depleted	CAWG_02093	Dal81-dependent	Stp2-dependent
C1_13290W_A	263.076	-1.43285	0.198841	-7.20603	5.76079e-13	1.86473e-12	depleted	CAWG_00121	Dal81-independent	Stp2-independent
C1_08590C_A	5382.39	-1.43271	0.125867	-11.3828	5.09549e-30	3.30794e-29	depleted	ERG1	Dal81-independent	Stp2-independent
C2_07930C_A	766.096	-1.43032	0.146542	-9.76045	1.66412e-22	8.38344e-22	depleted	VRP1	Dal81-dependent	Stp2-independent
CR_02470W_A	649.958	-1.42768	0.185043	-7.71535	1.20648e-14	4.25172e-14	depleted	snR33a	Dal81-independent	Stp2-dependent
C1_06980C_A	392.386	-1.42725	0.244137	-5.84611	5.03208e-09	1.2897e-08	depleted	CAWG_00718	Dal81-dependent	Stp2-dependent
CR_02960W_A	193.087	-1.42681	0.204032	-6.99309	2.68899e-12	8.33627e-12	depleted	CAWG_01632	Dal81-independent	Stp2-independent
C6_02300C_A	79.0776	-1.42592	0.35257	-4.04436	5.24669e-05	9.72719e-05	depleted	CAWG_05137	Dal81-independent	Stp2-independent
C3_06360C_A	2465.48	-1.41916	0.1183	-11.9963	3.71651e-33	2.62252e-32	depleted	CYP5	Dal81-independent	Stp2-independent
C1_00500C_A	1573.04	-1.41788	0.131495	-10.7828	4.15196e-27	2.45883e-26	depleted	GLO1	Dal81-independent	Stp2-independent
C2_06770W_A	228.578	-1.41405	0.214613	-6.58886	4.43202e-11	1.28509e-10	depleted	CAWG_05776	Dal81-independent	Stp2-dependent
CR_08830W_A	315.292	-1.40905	0.253853	-5.55066	2.84595e-08	6.90502e-08	depleted	CAWG_01515	Dal81-dependent	Stp2-independent
C6_03250W_A	947.358	-1.40885	0.133455	-10.5567	4.73032e-26	2.70272e-25	depleted	BMT4	Dal81-dependent	Stp2-dependent
C3_03530W_A	81.5839	-1.40541	0.350466	-4.01012	6.06873e-05	0.000111856	depleted	CAWG_02643	Dal81-independent	Stp2-independent
C1_00130C_A	721.246	-1.40155	0.164159	-8.53778	1.36819e-17	5.55887e-17	depleted	VPS53	Dal81-independent	Stp2-independent
C5_03480C_A	963.086	-1.40097	0.14421	-9.71479	2.6078e-22	1.30607e-21	depleted	CAWG_04721	Dal81-independent	Stp2-independent
C3_04100W_A	90.8375	-1.39997	0.273922	-5.11085	3.20713e-07	7.22115e-07	depleted	CAWG_02725	Dal81-independent	Stp2-independent
C3_02550C_A	107.04	-1.39975	0.273402	-5.11973	3.05971e-07	6.90476e-07	depleted	DCG1	Dal81-independent	Stp2-independent
CR_05840W_A	209.045	-1.39894	0.183593	-7.61979	2.54082e-14	8.79908e-14	depleted	CAWG_01903	Dal81-independent	Stp2-independent
C4_06320C_A	35.1566	-1.39763	0.457763	-3.05318	0.00226433	0.0035595	depleted	CAWG_03194	Dal81-independent	Stp2-independent
C4_03910W_A	266.327	-1.39457	0.193764	-7.19724	6.14423e-13	1.98473e-12	depleted	FGR28	Dal81-dependent	Stp2-independent
C6_04470C_A	885.214	-1.39417	0.158073	-8.81979	1.14671e-18	4.93973e-18	depleted	CAWG_04934	Dal81-dependent	Stp2-independent
CR_03040C_A	401.922	-1.39397	0.158041	-8.82029	1.14167e-18	4.92509e-18	depleted	HGT18	Dal81-independent	Stp2-dependent
C6_01960W_A	210.22	-1.39232	0.256686	-5.42421	5.82098e-08	1.38271e-07	depleted	CAWG_05171	Dal81-dependent	Stp2-independent
C3_00860W_A	338.759	-1.39061	0.16866	-8.24503	1.65119e-16	6.36828e-16	depleted	CSE4	Dal81-independent	Stp2-independent
C2_08420W_A	178.342	-1.3904	0.252406	-5.50857	3.61752e-08	8.71367e-08	depleted	CAWG_05926	Dal81-dependent	Stp2-dependent
C1_13260W_A	796.695	-1.38986	0.126862	-10.9557	6.23793e-28	3.81066e-27	depleted	CAWG_00124	Dal81-independent	Stp2-dependent
CR_00910W_A	5905.6	-1.38939	0.14676	-9.46714	2.87604e-21	1.39167e-20	depleted	orf19.3264.1	Dal81-independent	Stp2-independent
C3_02620C_A	391.036	-1.38878	0.16147	-8.60086	7.91186e-18	3.23863e-17	depleted	CAWG_02585	Dal81-dependent	Stp2-dependent
C6_00300C_A	1173.81	-1.38791	0.144249	-9.62163	6.47954e-22	3.21036e-21	depleted	STV1	Dal81-dependent	Stp2-dependent
C1_06200W_A	346.784	-1.38775	0.164723	-8.42478	3.61416e-17	1.44302e-16	depleted	CAWG_00788	Dal81-independent	Stp2-independent
C1_09930W_A	48.3044	-1.38644	0.400175	-3.46458	0.000531065	0.00089229	depleted	CAWG_00439	Dal81-independent	Stp2-independent
CR_10190C_A	221.072	-1.38348	0.206476	-6.70044	2.07787e-11	6.16481e-11	depleted	CAWG_02279	Dal81-independent	Stp2-independent
C2_00730C_A	326.028	-1.38237	0.179511	-7.70074	1.35284e-14	4.74798e-14	depleted	CAWG_03852	Dal81-dependent	Stp2-dependent
CR_08460W_A	3980.16	-1.3821	0.108021	-12.7948	1.75411e-37	1.39886e-36	depleted	TPM2	Dal81-independent	Stp2-independent
C4_05790W_A	420.363	-1.38209	0.173927	-7.94639	1.92021e-15	7.07415e-15	depleted	CAWG_03244	Dal81-independent	Stp2-independent
C2_03620W_A	176.129	-1.3818	0.235565	-5.86589	4.46734e-09	1.14839e-08	depleted	IFK2	Dal81-dependent	Stp2-dependent
C1_11470C_A	123.01	-1.38141	0.254949	-5.41838	6.01423e-08	1.42805e-07	depleted	DPP1	Dal81-independent	Stp2-independent
C3_05990C_A	126.864	-1.38088	0.22248	-6.20677	5.40836e-10	1.47691e-09	depleted	CAWG_02908	Dal81-dependent	Stp2-dependent
CR_09120C_A	3108.69	-1.38022	0.139724	-9.8782	5.17566e-23	2.67009e-22	depleted	TUB1	Dal81-dependent	Stp2-independent
CR_08960C_A	179.826	-1.37772	0.210754	-6.53708	6.27314e-11	1.80327e-10	depleted	MPS1	Dal81-independent	Stp2-independent
C1_00060W_A	7645.82	-1.37736	0.122509	-11.2429	2.5093e-29	1.60472e-28	depleted	TUP1	Dal81-independent	Stp2-independent
CR_08910C_A	1259.27	-1.37696	0.133446	-10.3185	5.81301e-25	3.22319e-24	depleted	RPN7	Dal81-dependent	Stp2-dependent
CR_09340W_A	987.155	-1.37557	0.154275	-8.9163	4.8211e-19	2.1097e-18	depleted	CAWG_02204	Dal81-dependent	Stp2-dependent
CR_00070W_A	388.181	-1.37206	0.197321	-6.95346	3.56434e-12	1.09483e-11	depleted	BNR1	Dal81-independent	Stp2-independent
C6_00710W_A	266.601	-1.37117	0.176474	-7.76986	7.85751e-15	2.80692e-14	depleted	CAWG_05288	Dal81-dependent	Stp2-independent
C6_04420W_A	3170.61	-1.37113	0.129213	-10.6115	2.63587e-26	1.52196e-25	depleted	CAWG_04938	Dal81-independent	Stp2-dependent
C1_09380W_A	508.761	-1.3673	0.161132	-8.48562	2.14576e-17	8.64785e-17	depleted	RIM20	Dal81-dependent	Stp2-dependent
C5_05400W_A	1520.68	-1.36723	0.135092	-10.1207	4.47046e-24	2.4163e-23	depleted	APM1	Dal81-independent	Stp2-independent
C2_08120W_A	588.513	-1.36669	0.181948	-7.5114	5.84988e-14	1.99368e-13	depleted	MAF1	Dal81-dependent	Stp2-dependent
C3_04290C_A	659.809	-1.36539	0.142807	-9.56113	1.1648e-21	5.71923e-21	depleted	SNF5	Dal81-independent	Stp2-independent
C4_06460C_A	182.501	-1.36433	0.223011	-6.11776	9.49012e-10	2.54298e-09	depleted	CAWG_03181	Dal81-independent	Stp2-independent
C5_04540C_A	101.731	-1.36259	0.26255	-5.18983	2.10488e-07	4.806e-07	depleted	CAWG_04823	Dal81-independent	Stp2-independent
C2_07940C_A	497.349	-1.3608	0.147498	-9.22591	2.81169e-20	1.29879e-19	depleted	ALG7	Dal81-independent	Stp2-independent
C4_07210W_A	356.959	-1.36073	0.180429	-7.54166	4.64009e-14	1.5904e-13	depleted	CAWG_03109	Dal81-independent	Stp2-dependent
C1_02230W_A	626.279	-1.36021	0.154851	-8.784	1.57761e-18	6.73316e-18	depleted	2025-09-07	Dal81-independent	Stp2-dependent
C1_07010W_A	230.539	-1.36015	0.210019	-6.4763	9.39961e-11	2.67891e-10	depleted	CAWG_00716	Dal81-independent	Stp2-independent
CR_02100C_A	262.762	-1.35995	0.182467	-7.45309	9.11811e-14	3.07435e-13	depleted	CAWG_01556	Dal81-independent	Stp2-independent
C7_03940C_A	658.581	-1.35979	0.161035	-8.44405	3.0652e-17	1.22792e-16	depleted	CLB4	Dal81-independent	Stp2-independent
C3_03280C_A	1188.54	-1.35676	0.129615	-10.4676	1.21753e-25	6.90395e-25	depleted	HTA3	Dal81-independent	Stp2-independent
C5_02840C_A	1069.23	-1.35652	0.133552	-10.1573	3.07547e-24	1.66982e-23	depleted	HSL1	Dal81-independent	Stp2-independent
C5_01460W_A	460.878	-1.35644	0.154584	-8.77473	1.71315e-18	7.29608e-18	depleted	YBL053	Dal81-independent	Stp2-independent
C1_11960C_A	524.191	-1.35476	0.148298	-9.13537	6.5186e-20	2.95428e-19	depleted	orf19.5269.1	Dal81-independent	Stp2-independent
C2_07980W_A	371.484	-1.35274	0.187209	-7.22585	4.97962e-13	1.61723e-12	depleted	CAWG_05891	Dal81-independent	Stp2-independent
C2_02190C_A	79.3927	-1.34961	0.328228	-4.11181	3.92574e-05	7.38073e-05	depleted	CAWG_03986	Dal81-independent	Stp2-independent
C2_08540C_A	99.4062	-1.34891	0.274366	-4.91647	8.81177e-07	1.91373e-06	depleted	CAWG_05938	Dal81-independent	Stp2-independent
CR_06690C_A	404.34	-1.34833	0.154878	-8.70578	3.15399e-18	1.32168e-17	depleted	CAWG_01968	Dal81-independent	Stp2-independent
C2_09030W_A	153.445	-1.34821	0.222578	-6.05724	1.38473e-09	3.67122e-09	depleted	orf19.201	Dal81-independent	Stp2-independent
CR_06170W_A	384.845	-1.34747	0.162421	-8.29618	1.07514e-16	4.19234e-16	depleted	CAWG_01932	Dal81-dependent	Stp2-dependent
C1_04830W_A	2406.18	-1.34587	0.113631	-11.8442	2.30736e-32	1.59078e-31	depleted	SEC21	Dal81-independent	Stp2-independent
C6_04560W_A	2444.77	-1.34287	0.113109	-11.8724	1.64628e-32	1.14024e-31	depleted	CAWG_04925	Dal81-independent	Stp2-independent
C3_07880C_A	101.981	-1.34215	0.296968	-4.5195	6.19858e-06	1.25328e-05	depleted	CAWG_03094	Dal81-independent	Stp2-independent
C3_03610W_A	109.823	-1.34212	0.274867	-4.8828	1.04592e-06	2.2544e-06	depleted	FUR4	Dal81-independent	Stp2-independent
C4_02950C_A	120.213	-1.34147	0.240499	-5.57788	2.43467e-08	5.94076e-08	depleted	CAWG_03503	Dal81-independent	Stp2-independent
C1_10940C_A	1347.19	-1.34094	0.124966	-10.7304	7.32662e-27	4.2798e-26	depleted	ERP5	Dal81-independent	Stp2-independent
C3_02860W_A	436.891	-1.34007	0.180582	-7.42082	1.16395e-13	3.90475e-13	depleted	THI6	Dal81-independent	Stp2-independent
C2_03800C_A	893.73	-1.33539	0.131278	-10.1722	2.63796e-24	1.43487e-23	depleted	CAWG_04141	Dal81-independent	Stp2-independent
C3_01350C_A	480.1	-1.33513	0.184106	-7.25198	4.10735e-13	1.33974e-12	depleted	URA3	Dal81-independent	Stp2-independent
C3_06180C_A	99.1698	-1.33428	0.262331	-5.08627	3.65182e-07	8.18254e-07	depleted	TSA1	Dal81-independent	Stp2-independent
C2_01530C_A	1285.25	-1.33299	0.118928	-11.2083	3.71227e-29	2.36899e-28	depleted	CAWG_03925	Dal81-dependent	Stp2-dependent
C6_01070C_A	135.815	-1.33238	0.22488	-5.92486	3.12567e-09	8.10434e-09	depleted	CIP1	Dal81-dependent	Stp2-dependent
CR_03720W_A	9711.01	-1.33062	0.113175	-11.7572	6.48616e-32	4.4311e-31	depleted	TAL1	Dal81-independent	Stp2-dependent
C2_09840W_A	89.1453	-1.33052	0.293451	-4.53404	5.78671e-06	1.17317e-05	depleted	MTW1	Dal81-independent	Stp2-independent
C2_02780C_A	172.872	-1.32857	0.217023	-6.12178	9.25334e-10	2.48175e-09	depleted	BUB2	Dal81-independent	Stp2-independent
C5_05410C_A	7668.86	-1.32849	0.156671	-8.47947	2.2622e-17	9.11102e-17	depleted	ILV3	Dal81-dependent	Stp2-dependent
C2_07080C_A	353.863	-1.32802	0.174397	-7.61489	2.63909e-14	9.12887e-14	depleted	CAWG_05805	Dal81-independent	Stp2-independent
C4_00390W_A	609.638	-1.3262	0.138289	-9.59006	8.80358e-22	4.33679e-21	depleted	CAWG_03744	Dal81-independent	Stp2-independent
CR_03410W_A	331.988	-1.32601	0.165647	-8.00505	1.19423e-15	4.43496e-15	depleted	CAWG_01676	Dal81-independent	Stp2-independent
C4_02940W_A	3218.25	-1.3255	0.113527	-11.6756	1.69835e-31	1.14206e-30	depleted	ABP1	Dal81-dependent	Stp2-dependent
C3_06510C_A	19.9469	-1.32421	0.633163	-2.09141	0.036491	0.049154	depleted	HST6	Dal81-independent	Stp2-independent
C2_10590W_A	1644.33	-1.32025	0.172837	-7.63871	2.19403e-14	7.61568e-14	depleted	GAL4	Dal81-independent	Stp2-independent
C1_08470W_A	306.027	-1.31865	0.169714	-7.76986	7.85718e-15	2.80692e-14	depleted	CAWG_00579	Dal81-independent	Stp2-independent
C1_00350C_A	691.758	-1.31523	0.217987	-6.03354	1.60405e-09	4.23959e-09	depleted	HMX1	Dal81-dependent	Stp2-dependent
C1_01720C_A	797.256	-1.31483	0.129235	-10.1739	2.59348e-24	1.41195e-23	depleted	snR5a	Dal81-independent	Stp2-independent
C1_08780W_A	1121.35	-1.31217	0.131005	-10.0161	1.29456e-23	6.80124e-23	depleted	CAWG_00548	Dal81-independent	Stp2-independent
C3_01600W_A	834.298	-1.3109	0.130016	-10.0826	6.59528e-24	3.52983e-23	depleted	PPH21	Dal81-independent	Stp2-independent
C1_11190W_A	331.83	-1.31088	0.206752	-6.34034	2.29265e-10	6.42733e-10	depleted	ARL3	Dal81-independent	Stp2-independent
C6_01390W_A	593.659	-1.30663	0.138126	-9.45974	3.08723e-21	1.49146e-20	depleted	HOC1	Dal81-independent	Stp2-independent
C2_02020W_A	827.495	-1.30387	0.145246	-8.97702	2.7819e-19	1.22923e-18	depleted	CAWG_03970	Dal81-dependent	Stp2-dependent
C4_00710W_A	466.767	-1.30198	0.153717	-8.46997	2.45446e-17	9.8721e-17	depleted	CAWG_03710	Dal81-dependent	Stp2-dependent
CR_10380C_A	663.851	-1.30149	0.202027	-6.44215	1.17796e-10	3.34135e-10	depleted	CAWG_02297	Dal81-independent	Stp2-independent
C1_01670C_A	286.902	-1.29942	0.175682	-7.39642	1.39909e-13	4.67792e-13	depleted	ESP1	Dal81-independent	Stp2-independent
CR_10800C_A	1135.7	-1.29931	0.125235	-10.375	3.22303e-25	1.80712e-24	depleted	CAWG_02337	Dal81-independent	Stp2-independent
C2_00960C_A	1779.27	-1.29855	0.120678	-10.7605	5.29105e-27	3.11497e-26	depleted	MXR1	Dal81-independent	Stp2-independent
C2_02260W_A	879.024	-1.29711	0.130391	-9.94787	2.57628e-23	1.34293e-22	depleted	CAWG_03994	Dal81-independent	Stp2-independent
C1_07180W_A	1385.72	-1.2965	0.121982	-10.6286	2.19374e-26	1.26911e-25	depleted	CCS1	Dal81-independent	Stp2-independent
C1_10610W_A	1412.84	-1.29579	0.145129	-8.92854	4.31676e-19	1.89213e-18	depleted	FCY23	Dal81-dependent	Stp2-dependent
C7_00910C_A	360.766	-1.29532	0.207997	-6.22758	4.73701e-10	1.30246e-09	depleted	orf19.7023	Dal81-independent	Stp2-independent
C2_08100W_A	1043.64	-1.29422	0.148781	-8.69882	3.3534e-18	1.40329e-17	depleted	CAWG_05901	Dal81-dependent	Stp2-dependent
C2_01870C_A	229.563	-1.29298	0.182355	-7.09045	1.33672e-12	4.22474e-12	depleted	CAWG_03955	Dal81-independent	Stp2-independent
C7_00380W_A	442.587	-1.29186	0.15293	-8.44736	2.97953e-17	1.1952e-16	depleted	CAWG_05395	Dal81-independent	Stp2-dependent
C2_08970C_A	165.481	-1.29022	0.217441	-5.93363	2.96309e-09	7.69608e-09	depleted	DFG10	Dal81-independent	Stp2-independent
C4_01150W_A	221.236	-1.28978	0.198943	-6.48313	8.98371e-11	2.56281e-10	depleted	ASK1	Dal81-independent	Stp2-independent
CR_02380C_A	152.653	-1.28647	0.257126	-5.00327	5.63669e-07	1.24626e-06	depleted	CAWG_01580	Dal81-dependent	Stp2-dependent
C2_02050C_A	297.025	-1.28367	0.194683	-6.59364	4.29171e-11	1.24561e-10	depleted	CAWG_03973	Dal81-dependent	Stp2-dependent
C1_10500W_A	258.331	-1.28294	0.184427	-6.95637	3.49158e-12	1.07358e-11	depleted	CAWG_00383	Dal81-dependent	Stp2-dependent
C7_01230C_A	780.524	-1.28282	0.145531	-8.81476	1.19937e-18	5.15918e-18	depleted	CAWG_05476	Dal81-dependent	Stp2-dependent
C3_03040W_A	2404.03	-1.28222	0.115242	-11.1263	9.34837e-29	5.84152e-28	depleted	AIP2	Dal81-independent	Stp2-independent
C4_01480C_A	65.8016	-1.28215	0.333159	-3.84846	0.000118863	0.000214025	depleted	orf19.4636	Dal81-independent	Stp2-independent
CR_06180W_A	1393.19	-1.28176	0.118561	-10.8109	3.05551e-27	1.82208e-26	depleted	ARC40	Dal81-independent	Stp2-independent
C4_06400C_A	706.493	-1.28171	0.14069	-9.11018	8.22491e-20	3.71079e-19	depleted	VMA8	Dal81-independent	Stp2-independent
C3_03180C_A	948.15	-1.28072	0.1273	-10.0606	8.2468e-24	4.39415e-23	depleted	PNP1	Dal81-independent	Stp2-independent
C6_01400W_A	35.5794	-1.27791	0.418144	-3.05616	0.00224193	0.00352614	depleted	CAWG_05224	Dal81-independent	Stp2-independent
C3_00190W_A	152.639	-1.27301	0.272311	-4.67484	2.94188e-06	6.10435e-06	depleted	CAWG_02354	Dal81-independent	Stp2-independent
C4_04770C_A	2027.37	-1.27103	0.146353	-8.68471	3.79697e-18	1.58229e-17	depleted	MNN22	Dal81-dependent	Stp2-dependent
C1_05170C_A	1323.71	-1.27021	0.122705	-10.3517	4.10998e-25	2.28947e-24	depleted	CUE5	Dal81-dependent	Stp2-dependent
C4_06970C_A	79.5236	-1.26991	0.322044	-3.94327	8.0379e-05	0.000146933	depleted	ZRT1	Dal81-dependent	Stp2-dependent
CR_04230W_A	493.327	-1.26977	0.145409	-8.73245	2.49208e-18	1.05164e-17	depleted	CAWG_01760	Dal81-independent	Stp2-independent
C3_04740C_A	239.728	-1.26815	0.190945	-6.6414	3.10714e-11	9.10609e-11	depleted	CAWG_02787	Dal81-independent	Stp2-independent
C1_08740C_A	3742.78	-1.26665	0.118703	-10.6708	1.3941e-26	8.09631e-26	depleted	SEC24	Dal81-independent	Stp2-dependent
C1_12700W_A	174.936	-1.2651	0.20657	-6.12432	9.10692e-10	2.44575e-09	depleted	CAWG_00172	Dal81-independent	Stp2-independent
C3_07770C_A	291.15	-1.26271	0.218652	-5.77495	7.69772e-09	1.94222e-08	depleted	CAWG_03083	Dal81-independent	Stp2-independent
C2_04420W_A	43.3372	-1.26226	0.386521	-3.26568	0.00109201	0.00177469	depleted	IFA4	Dal81-independent	Stp2-independent
CR_09910W_A	116.072	-1.26206	0.298225	-4.23191	2.31715e-05	4.46119e-05	depleted	GNP3	Dal81-dependent	Stp2-dependent
C3_07820W_A	391.393	-1.25729	0.17524	-7.17469	7.24694e-13	2.32591e-12	depleted	CAWG_03088	Dal81-independent	Stp2-independent
C2_09630C_A	82.5218	-1.25714	0.317785	-3.95594	7.62334e-05	0.000139567	depleted	CAWG_06036	Dal81-independent	Stp2-independent
C1_09600C_A	218.221	-1.25529	0.242615	-5.17401	2.29124e-07	5.22358e-07	depleted	LIP6	Dal81-independent	Stp2-independent
C5_05480W_A	4888.08	-1.25339	0.132246	-9.47766	2.6005e-21	1.26037e-20	depleted	DES1	Dal81-independent	Stp2-independent
C6_00210W_A	727.758	-1.25123	0.155149	-8.06469	7.34225e-16	2.75048e-15	depleted	CAWG_05336	Dal81-independent	Stp2-independent
C1_01760W_A	298.167	-1.25037	0.204608	-6.11105	9.89785e-10	2.64869e-09	depleted	FGR38	Dal81-dependent	Stp2-dependent
C3_01070C_A	183.707	-1.24901	0.213683	-5.84514	5.06135e-09	1.29609e-08	depleted	CAWG_02442	Dal81-dependent	Stp2-dependent
C2_03610W_A	69.526	-1.24797	0.303501	-4.11192	3.92377e-05	7.38073e-05	depleted	FMO2	Dal81-dependent	Stp2-independent
C2_01670C_A	1427.26	-1.24796	0.123827	-10.0783	6.89117e-24	3.68163e-23	depleted	STT3	Dal81-independent	Stp2-dependent
C3_06330W_A	58.3692	-1.24568	0.338828	-3.67642	0.000236526	0.000413852	depleted	TSA1B	Dal81-independent	Stp2-independent
C1_04870W_A	22.6072	-1.24556	0.496636	-2.508	0.0121416	0.0174051	depleted	SAP7	Dal81-dependent	Stp2-dependent
C1_12400C_A	477.248	-1.24519	0.15842	-7.86004	3.84016e-15	1.38917e-14	depleted	CAWG_00201	Dal81-independent	Stp2-independent
C3_01590W_A	357.68	-1.24284	0.196547	-6.3234	2.55869e-10	7.14316e-10	depleted	CAWG_02491	Dal81-independent	Stp2-independent
C1_03760C_A	1429.1	-1.24245	0.1164	-10.674	1.34733e-26	7.83226e-26	depleted	STR2	Dal81-independent	Stp2-independent
C1_02280C_A	258.167	-1.24164	0.176832	-7.02156	2.19404e-12	6.84784e-12	depleted	PSY2	Dal81-independent	Stp2-independent
C3_07940W_A	1032.98	-1.23894	0.132476	-9.35218	8.5856e-21	4.05e-20	depleted	CAWG_03100	Dal81-independent	Stp2-independent
C2_01920C_A	344.089	-1.2372	0.157381	-7.86114	3.80663e-15	1.3787e-14	depleted	CAWG_03960	Dal81-dependent	Stp2-dependent
C1_05160C_A	702.964	-1.23601	0.193367	-6.39202	1.63704e-10	4.60658e-10	depleted	CAWG_00882	Dal81-dependent	Stp2-dependent
C2_05200C_A	323.853	-1.23515	0.179332	-6.88749	5.6786e-12	1.73184e-11	depleted	SGO1	Dal81-independent	Stp2-independent
C7_03200C_A	1087.13	-1.23501	0.130898	-9.43494	3.91207e-21	1.88087e-20	depleted	CAWG_05653	Dal81-independent	Stp2-independent
C3_07140C_A	162.249	-1.23434	0.228451	-5.40309	6.5504e-08	1.55291e-07	depleted	orf19.6786	Dal81-independent	Stp2-independent
C3_06350W_A	222.605	-1.23273	0.210868	-5.84598	5.03592e-09	1.29013e-08	depleted	CAWG_02947	Dal81-independent	Stp2-independent
C1_12490W_A	1761.55	-1.23222	0.128338	-9.60137	7.88854e-22	3.89882e-21	depleted	PEP1	Dal81-independent	Stp2-independent
C7_04280C_A	772.827	-1.23221	0.150213	-8.20311	2.34246e-16	8.97669e-16	depleted	CAWG_05757	Dal81-independent	Stp2-independent
C6_00090W_A	409.194	-1.23161	0.16469	-7.47835	7.5262e-14	2.55338e-13	depleted	CAWG_05348	Dal81-independent	Stp2-dependent
C1_04670W_A	325.002	-1.23066	0.186883	-6.58521	4.54228e-11	1.31643e-10	depleted	HAT1	Dal81-dependent	Stp2-dependent
C3_03430C_A	181.723	-1.22989	0.196039	-6.27372	3.5253e-10	9.73756e-10	depleted	CAWG_02653	Dal81-independent	Stp2-independent
C1_08070W_A	2834.77	-1.22976	0.173272	-7.09727	1.27242e-12	4.02786e-12	depleted	CDR4	Dal81-dependent	Stp2-dependent
C2_10670W_A	2695.87	-1.22546	0.110345	-11.1058	1.17615e-28	7.31895e-28	depleted	CAWG_06128	Dal81-independent	Stp2-independent
C3_00060W_A	121.764	-1.22475	0.285207	-4.29425	1.75283e-05	3.42078e-05	depleted	TLO7	Dal81-independent	Stp2-independent
C3_02580C_A	146.097	-1.22469	0.211989	-5.77714	7.59808e-09	1.92031e-08	depleted	CAWG_02581	Dal81-independent	Stp2-independent
C1_08680C_A	357.026	-1.22429	0.158625	-7.71815	1.18034e-14	4.1645e-14	depleted	CAWG_00557	Dal81-dependent	Stp2-dependent
C3_02170C_A	1874.25	-1.2238	0.141354	-8.65769	4.81441e-18	1.99935e-17	depleted	LAP41	Dal81-dependent	Stp2-dependent
C1_09610W_A	946.31	-1.22292	0.158797	-7.70114	1.34858e-14	4.73866e-14	depleted	CAWG_00469	Dal81-independent	Stp2-independent
C5_05500C_A	2273.63	-1.22209	0.113542	-10.7633	5.12855e-27	3.02227e-26	depleted	CTA24	Dal81-independent	Stp2-independent
C2_05560W_A	247.946	-1.222	0.203228	-6.01296	1.8217e-09	4.80427e-09	depleted	CAWG_04304	Dal81-dependent	Stp2-dependent
C2_00430C_A	525.022	-1.2219	0.157951	-7.73595	1.02632e-14	3.63602e-14	depleted	DPB4	Dal81-independent	Stp2-independent
C1_05100W_A	154.454	-1.22149	0.209416	-5.83284	5.44906e-09	1.39004e-08	depleted	CAWG_00888	Dal81-independent	Stp2-independent
C4_01700C_A	6326.19	-1.22058	0.105377	-11.583	5.02562e-31	3.34206e-30	depleted	NHP6A	Dal81-independent	Stp2-independent
C3_04820C_A	1683.73	-1.22023	0.12265	-9.94888	2.55035e-23	1.33057e-22	depleted	SEC7	Dal81-independent	Stp2-independent
C7_03580C_A	403.874	-1.21941	0.173909	-7.01179	2.35284e-12	7.32443e-12	depleted	CAWG_05689	Dal81-independent	Stp2-independent
CR_06470W_A	688.338	-1.21892	0.139015	-8.76831	1.81371e-18	7.71413e-18	depleted	CAWG_01951	Dal81-dependent	Stp2-dependent
C3_00430W_A	32.8406	-1.21829	0.472231	-2.57986	0.00988417	0.014382	depleted	EST3	Dal81-independent	Stp2-independent
C1_12550C_A	641.214	-1.2179	0.151634	-8.03183	9.60284e-16	3.57946e-15	depleted	CDC54	Dal81-independent	Stp2-independent
CR_08560C_A	1011.17	-1.21706	0.140941	-8.63526	5.85959e-18	2.41834e-17	depleted	CAWG_02141	Dal81-independent	Stp2-independent
C1_02920W_A	732.284	-1.2164	0.138261	-8.79791	1.39393e-18	5.97043e-18	depleted	CDC73	Dal81-independent	Stp2-independent
C1_13030C_A	2542.87	-1.21496	0.117706	-10.322	5.60438e-25	3.11326e-24	depleted	CAWG_00144	Dal81-dependent	Stp2-independent
C1_07850C_A	125.547	-1.21464	0.23233	-5.2281	1.71262e-07	3.93281e-07	depleted	CAWG_00635	Dal81-independent	Stp2-independent
CR_03630W_A	502.786	-1.21435	0.196097	-6.19258	5.91858e-10	1.61038e-09	depleted	IFF3	Dal81-independent	Stp2-independent
C2_10840W_A	536.24	-1.21078	0.152687	-7.92985	2.19404e-15	8.04347e-15	depleted	RDH54	Dal81-independent	Stp2-independent
C4_00580W_A	334.869	-1.21019	0.232707	-5.20051	1.98741e-07	4.54818e-07	depleted	CAWG_03723	Dal81-independent	Stp2-independent
C1_03270W_A	142.047	-1.2095	0.260534	-4.64239	3.44398e-06	7.1216e-06	depleted	CAWG_01057	Dal81-dependent	Stp2-dependent
C3_05720C_A	308.834	-1.20928	0.164535	-7.34967	1.98694e-13	6.59205e-13	depleted	KIP3	Dal81-independent	Stp2-independent
C3_03230C_A	343.384	-1.20751	0.169076	-7.14179	9.21225e-13	2.94096e-12	depleted	CAWG_02671	Dal81-independent	Stp2-independent
C1_04570C_A	44.9608	-1.20659	0.365069	-3.30511	0.000949398	0.00155344	depleted	CHL4	Dal81-independent	Stp2-independent
C7_00930W_A	4066.74	-1.20572	0.14608	-8.25378	1.53466e-16	5.94558e-16	depleted	GPH1	Dal81-dependent	Stp2-dependent
C5_04260W_A	180.38	-1.2046	0.261689	-4.60319	4.1607e-06	8.54773e-06	depleted	CAWG_04799	Dal81-independent	Stp2-independent
C2_09100C_A	503.716	-1.20376	0.158778	-7.58141	3.4181e-14	1.17558e-13	depleted	CAWG_05991	Dal81-independent	Stp2-independent
CR_03880W_A	638.366	-1.20339	0.158609	-7.58718	3.26933e-14	1.12635e-13	depleted	IFF9	Dal81-independent	Stp2-independent
C3_02570W_A	230.919	-1.20086	0.245454	-4.89239	9.96213e-07	2.15344e-06	depleted	CAWG_02580	Dal81-independent	Stp2-independent
C4_06200W_A	47.0266	-1.20073	0.399497	-3.00559	0.00265063	0.00413537	depleted	orf19.2917.1	Dal81-independent	Stp2-independent
C5_02850W_A	3150.53	-1.20066	0.122314	-9.81622	9.58681e-23	4.89947e-22	depleted	snR10c	Dal81-independent	Stp2-independent
C2_10420W_A	95.5366	-1.20059	0.271053	-4.42935	9.4517e-06	1.88626e-05	depleted	FGR6-4	Dal81-independent	Stp2-independent
C6_04550C_A	662.548	-1.19978	0.167651	-7.15644	8.28006e-13	2.65041e-12	depleted	CAWG_04926	Dal81-independent	Stp2-independent
C1_07370C_A	113.533	-1.19961	0.242886	-4.93898	7.85309e-07	1.71714e-06	depleted	CPH1	Dal81-dependent	Stp2-dependent
CR_08780W_A	151.483	-1.19828	0.307559	-3.89609	9.77578e-05	0.000177085	depleted	ITS1	Dal81-independent	Stp2-dependent
C6_03070C_A	60.9708	-1.19763	0.327414	-3.65784	0.000254347	0.000443869	depleted	orf19.5589	Dal81-independent	Stp2-independent
C3_07490W_A	1021.75	-1.19707	0.127312	-9.40271	5.31775e-21	2.54447e-20	depleted	CAWG_03058	Dal81-independent	Stp2-independent
CR_04480C_A	781.392	-1.19704	0.210514	-5.68627	1.29844e-08	3.23667e-08	depleted	LAP3	Dal81-independent	Stp2-independent
C1_14480W_A	302.138	-1.19518	0.192388	-6.21235	5.21986e-10	1.42933e-09	depleted	CAWG_00007	Dal81-independent	Stp2-independent
C2_01140C_A	60.3567	-1.19266	0.339931	-3.50852	0.000450603	0.000764371	depleted	CAWG_03889	Dal81-independent	Stp2-independent
C3_07810C_A	2053.72	-1.19244	0.122138	-9.76312	1.62083e-22	8.1722e-22	depleted	SEC61	Dal81-independent	Stp2-independent
CR_00390W_A	322.016	-1.19189	0.161728	-7.36972	1.70985e-13	5.68215e-13	depleted	MMS22	Dal81-independent	Stp2-independent
C2_04500W_A	1167.41	-1.19167	0.128201	-9.29532	1.46763e-20	6.8638e-20	depleted	CAWG_04206	Dal81-independent	Stp2-independent
C1_11990W_A	529.925	-1.19122	0.142358	-8.36782	5.86945e-17	2.3173e-16	depleted	CAWG_00243	Dal81-dependent	Stp2-dependent
CR_04350C_A	339.128	-1.1912	0.179652	-6.63062	3.34273e-11	9.78699e-11	depleted	CAWG_01771	Dal81-independent	Stp2-dependent
C2_05550W_A	441.193	-1.19074	0.160821	-7.40414	1.31998e-13	4.41834e-13	depleted	CAWG_04303	Dal81-dependent	Stp2-dependent
C5_03490C_A	498.941	-1.18982	0.170897	-6.9622	3.34993e-12	1.03055e-11	depleted	CAWG_04722	Dal81-dependent	Stp2-dependent
CR_04950W_A	483.29	-1.18968	0.167219	-7.11451	1.1231e-12	3.56836e-12	depleted	MED5	Dal81-independent	Stp2-independent
C1_08340C_A	197.816	-1.18816	0.201004	-5.91113	3.39766e-09	8.78302e-09	depleted	CAWG_00591	Dal81-dependent	Stp2-dependent
C7_04210C_A	3440.03	-1.18812	0.123163	-9.6467	5.07613e-22	2.52127e-21	depleted	CAWG_05750	Dal81-independent	Stp2-independent
CR_04040C_A	387.27	-1.18763	0.165215	-7.18835	6.55773e-13	2.11488e-12	depleted	SPT14	Dal81-independent	Stp2-independent
C2_07200W_A	315.901	-1.18709	0.174758	-6.79278	1.09997e-11	3.30762e-11	depleted	CAWG_05816	Dal81-independent	Stp2-independent
CR_04650W_A	170.126	-1.1861	0.239156	-4.95952	7.06686e-07	1.55331e-06	depleted	CAWG_01800	Dal81-independent	Stp2-independent
C1_09200W_A	290.516	-1.18427	0.190784	-6.20739	5.38712e-10	1.47178e-09	depleted	LYS142	Dal81-independent	Stp2-dependent
C3_06860C_A	1023.31	-1.1836	0.152383	-7.76727	8.01942e-15	2.85966e-14	depleted	CAWG_02996	Dal81-dependent	Stp2-independent
C1_08730W_A	416.776	-1.18292	0.168579	-7.01702	2.26645e-12	7.05915e-12	depleted	CAWG_00553	Dal81-dependent	Stp2-independent
C6_00320C_A	354.122	-1.18286	0.176421	-6.70474	2.01766e-11	5.99212e-11	depleted	DNA2	Dal81-independent	Stp2-independent
C1_08320W_A	10086.9	-1.18272	0.115913	-10.2035	1.91215e-24	1.04291e-23	depleted	TKL1	Dal81-dependent	Stp2-dependent
C6_03030W_A	36.0408	-1.18205	0.440824	-2.68145	0.00733041	0.0108555	depleted	SAP5	Dal81-dependent	Stp2-dependent
C2_09960W_A	138.73	-1.17995	0.229313	-5.14558	2.66702e-07	6.03473e-07	depleted	CAWG_06068	Dal81-dependent	Stp2-dependent
C3_06250W_A	1152.36	-1.17434	0.133298	-8.8099	1.25254e-18	5.3802e-18	depleted	ERV25	Dal81-independent	Stp2-independent
C1_01690C_A	5775.29	-1.17376	0.119785	-9.79886	1.13866e-22	5.77502e-22	depleted	LSC1	Dal81-dependent	Stp2-dependent
C2_08960C_A	216.605	-1.17353	0.238649	-4.9174	8.77005e-07	1.90605e-06	depleted	CAWG_05979	Dal81-independent	Stp2-independent
C2_00330C_A	864.871	-1.17289	0.137419	-8.5351	1.40032e-17	5.67405e-17	depleted	HIR1	Dal81-independent	Stp2-independent
C4_00720W_A	159.968	-1.17116	0.234521	-4.99385	5.91889e-07	1.30624e-06	depleted	CSP2	Dal81-independent	Stp2-independent
CR_01480W_A	458.351	-1.17111	0.148474	-7.88767	3.07888e-15	1.12462e-14	depleted	PRS	Dal81-dependent	Stp2-dependent
C2_10200W_A	225.995	-1.17005	0.226671	-5.16187	2.44501e-07	5.55305e-07	depleted	CAWG_06091	Dal81-independent	Stp2-dependent
C4_01240C_A	253.673	-1.16935	0.227461	-5.14085	2.73493e-07	6.18113e-07	depleted	CAWG_03660	Dal81-dependent	Stp2-independent
CR_08300C_A	1457.6	-1.16888	0.116765	-10.0105	1.37104e-23	7.19046e-23	depleted	CAWG_02118	Dal81-dependent	Stp2-dependent
C1_00850W_A	361.931	-1.16752	0.182123	-6.41059	1.44955e-10	4.08857e-10	depleted	IHD2	Dal81-dependent	Stp2-independent
C3_00130C_A	3165.16	-1.16631	0.123678	-9.4302	4.0932e-21	1.96637e-20	depleted	CAWG_02349	Dal81-independent	Stp2-independent
C3_05880C_A	1132.59	-1.16628	0.158236	-7.37052	1.69967e-13	5.65458e-13	depleted	CAWG_02897	Dal81-dependent	Stp2-dependent
C4_02120W_A	697.923	-1.16426	0.142336	-8.17967	2.84633e-16	1.08729e-15	depleted	ERV29	Dal81-dependent	Stp2-dependent
C7_03180C_A	2936.23	-1.16415	0.129367	-8.99883	2.28142e-19	1.01256e-18	depleted	HHO1	Dal81-dependent	Stp2-independent
C4_06940C_A	715.772	-1.16374	0.142958	-8.14044	3.9383e-16	1.49397e-15	depleted	CAWG_03134	Dal81-dependent	Stp2-dependent
C3_00550C_A	2248.91	-1.16362	0.116063	-10.0258	1.17428e-23	6.18558e-23	depleted	HRK1	Dal81-independent	Stp2-independent
C3_02430W_A	465.498	-1.1635	0.159233	-7.30689	2.73388e-13	9.0104e-13	depleted	APL2	Dal81-independent	Stp2-dependent
C3_07080W_A	212.442	-1.16342	0.2076	-5.60413	2.09304e-08	5.14268e-08	depleted	RRD1	Dal81-dependent	Stp2-dependent
C3_00260C_A	1294.29	-1.16314	0.126926	-9.16391	5.0051e-20	2.28386e-19	depleted	BNA4	Dal81-dependent	Stp2-dependent
C2_08490W_A	834.852	-1.16276	0.176813	-6.57621	4.82583e-11	1.39591e-10	depleted	DSE1	Dal81-independent	Stp2-independent
C2_04150C_A	517.846	-1.16269	0.140979	-8.24727	1.62053e-16	6.26207e-16	depleted	VMA7	Dal81-independent	Stp2-independent
C1_09290C_A	3638.14	-1.16214	0.174744	-6.6505	2.92092e-11	8.57708e-11	depleted	ARG5,6	Dal81-dependent	Stp2-dependent
C6_03530C_A	203.335	-1.16162	0.248073	-4.6826	2.83257e-06	5.88566e-06	depleted	CAWG_05017	Dal81-independent	Stp2-dependent
C2_10570W_A	604.635	-1.16081	0.163865	-7.08392	1.40133e-12	4.41963e-12	depleted	SGS1	Dal81-independent	Stp2-independent
C4_00120W_A	189.247	-1.15821	0.259619	-4.4612	8.15034e-06	1.63524e-05	depleted	PGA7	Dal81-dependent	Stp2-dependent
C1_03720C_A	417.927	-1.15721	0.151353	-7.64575	2.07728e-14	7.2188e-14	depleted	CAWG_01019	Dal81-independent	Stp2-independent
C1_02510W_A	129.336	-1.15606	0.230329	-5.01918	5.1893e-07	1.14946e-06	depleted	CAWG_01130	Dal81-independent	Stp2-dependent
CR_04070W_A	488.457	-1.15491	0.148229	-7.79142	6.62602e-15	2.37406e-14	depleted	NAT5	Dal81-independent	Stp2-independent
C2_09940W_A	13371.4	-1.15486	0.131954	-8.75199	2.09628e-18	8.88993e-18	depleted	GCN4	Dal81-dependent	Stp2-dependent
C1_08450C_A	1293.92	-1.1548	0.131867	-8.75731	1.99972e-18	8.48643e-18	depleted	CDC42	Dal81-independent	Stp2-independent
CR_09520C_A	291.123	-1.15362	0.189556	-6.08592	1.15827e-09	3.08855e-09	depleted	CAWG_02219	Dal81-independent	Stp2-independent
C2_10010C_A	795.97	-1.15282	0.15464	-7.45488	8.99496e-14	3.03453e-13	depleted	CAWG_06072	Dal81-independent	Stp2-independent
C2_03890W_A	145.624	-1.15208	0.22302	-5.16583	2.39376e-07	5.44697e-07	depleted	CAWG_04147	Dal81-independent	Stp2-independent
CR_06730W_A	184.403	-1.15082	0.237016	-4.85544	1.20123e-06	2.57252e-06	depleted	APG7	Dal81-dependent	Stp2-dependent
CR_01180W_A	398.928	-1.1506	0.160073	-7.18799	6.57501e-13	2.11932e-12	depleted	CAWG_01471	Dal81-independent	Stp2-independent
C1_13770C_A	71.6997	-1.15009	0.29204	-3.93813	8.21195e-05	0.000149978	depleted	CAWG_00075	Dal81-independent	Stp2-independent
C6_03100W_A	584.22	-1.14555	0.143658	-7.97418	1.5339e-15	5.66486e-15	depleted	SHE3	Dal81-dependent	Stp2-independent
CR_00350W_A	1507.68	-1.14547	0.129207	-8.86539	7.62366e-19	3.30781e-18	depleted	CAWG_01395	Dal81-independent	Stp2-independent
C2_01900C_A	248.96	-1.14338	0.210774	-5.42467	5.80621e-08	1.3803e-07	depleted	CAWG_03958	Dal81-independent	Stp2-independent
C3_00770C_A	1040.18	-1.14277	0.126048	-9.06614	1.23304e-19	5.52568e-19	depleted	SCL1	Dal81-dependent	Stp2-dependent
CR_09580C_A	343.639	-1.14224	0.179887	-6.34975	2.15659e-10	6.04874e-10	depleted	CAWG_02224	Dal81-dependent	Stp2-dependent
C6_00720C_A	1528.69	-1.14151	0.141558	-8.06393	7.38787e-16	2.76585e-15	depleted	COX15	Dal81-dependent	Stp2-independent
C4_04950W_A	41.1104	-1.14108	0.453998	-2.5134	0.0119574	0.0171657	depleted	CAWG_03320	Dal81-independent	Stp2-independent
C1_05110C_A	6024.02	-1.14056	0.158692	-7.18726	6.61035e-13	2.12843e-12	depleted	ARO4	Dal81-dependent	Stp2-dependent
C3_03920W_A	289.47	-1.13946	0.170715	-6.67462	2.47878e-11	7.31813e-11	depleted	orf19.6923.1	Dal81-independent	Stp2-independent
C4_01550C_A	1937.32	-1.13927	0.180349	-6.31705	2.66596e-10	7.43572e-10	depleted	CPA1	Dal81-dependent	Stp2-dependent
CR_01150C_A	456.587	-1.13836	0.188834	-6.02833	1.65664e-09	4.37471e-09	depleted	CTF18	Dal81-independent	Stp2-independent
C3_04130W_A	419.88	-1.13657	0.178106	-6.38143	1.75442e-10	4.92994e-10	depleted	CAWG_02728	Dal81-dependent	Stp2-dependent
C3_07890W_A	161.647	-1.13614	0.236847	-4.79692	1.61122e-06	3.41284e-06	depleted	TIM8	Dal81-independent	Stp2-independent
C1_11450C_A	2427.22	-1.13526	0.129004	-8.80013	1.36661e-18	5.86177e-18	depleted	SAM2	Dal81-independent	Stp2-independent
C1_06850W_A	705.223	-1.13521	0.143079	-7.93417	2.11908e-15	7.7829e-15	depleted	PCL7	Dal81-dependent	Stp2-dependent
C1_04550W_A	151.813	-1.13514	0.231582	-4.90169	9.50136e-07	2.05754e-06	depleted	ELC1	Dal81-independent	Stp2-independent
C4_00010W_A	736.718	-1.1349	0.129117	-8.7897	1.4996e-18	6.40933e-18	depleted	TLO9	Dal81-independent	Stp2-independent
C4_03880W_A	77.4205	-1.13485	0.329898	-3.44001	0.00058169	0.000973808	depleted	CAWG_03424	Dal81-independent	Stp2-dependent
C1_12860C_A	147.801	-1.13384	0.2151	-5.27125	1.35498e-07	3.14643e-07	depleted	orf19.4916	Dal81-independent	Stp2-independent
C1_02740C_A	78.0721	-1.13309	0.272253	-4.16189	3.15618e-05	6.00153e-05	depleted	CAWG_01109	Dal81-independent	Stp2-dependent
C1_13920W_A	574.414	-1.13126	0.147694	-7.6595	1.86658e-14	6.49786e-14	depleted	DOS2	Dal81-independent	Stp2-dependent
CR_07110C_A	87.6022	-1.13113	0.259812	-4.35365	1.33889e-05	2.64011e-05	depleted	CAWG_02009	Dal81-independent	Stp2-independent
C3_04690C_A	210.582	-1.1302	0.221454	-5.10353	3.33367e-07	7.49203e-07	depleted	CAWG_02782	Dal81-independent	Stp2-independent
C1_14500C_A	2438.04	-1.13002	0.10933	-10.3359	4.84874e-25	2.69849e-24	depleted	CAWG_00005	Dal81-independent	Stp2-independent
CR_01070W_A	175.958	-1.12927	0.228427	-4.94367	7.66658e-07	1.67837e-06	depleted	CAWG_01460	Dal81-independent	Stp2-independent
C3_01360C_A	520.326	-1.1281	0.146871	-7.6809	1.5797e-14	5.51837e-14	depleted	IRO1	Dal81-dependent	Stp2-dependent
C2_08460C_A	59.0847	-1.12782	0.397659	-2.83615	0.00456612	0.00694609	depleted	CAWG_05930	Dal81-independent	Stp2-independent
C6_00820W_A	8009.08	-1.12678	0.120898	-9.32008	1.16251e-20	5.4709e-20	depleted	SUN41	Dal81-independent	Stp2-independent
C3_04410C_A	1324.89	-1.1266	0.148126	-7.60569	2.83396e-14	9.78603e-14	depleted	CAWG_02753	Dal81-independent	Stp2-independent
C2_05120C_A	142.768	-1.12609	0.234356	-4.80504	1.54717e-06	3.28412e-06	depleted	orf19.3543	Dal81-independent	Stp2-independent
C5_05350W_A	696.031	-1.12442	0.138827	-8.09946	5.52054e-16	2.08103e-15	depleted	CAWG_04901	Dal81-independent	Stp2-independent
C2_06320W_A	740.576	-1.12355	0.158884	-7.07156	1.53203e-12	4.81164e-12	depleted	CAWG_04376	Dal81-dependent	Stp2-dependent
C1_13990W_A	166.858	-1.12315	0.206791	-5.4313	5.5945e-08	1.33102e-07	depleted	OCA6	Dal81-independent	Stp2-independent
C1_00690W_A	276.166	-1.12164	0.172186	-6.5141	7.31284e-11	2.09711e-10	depleted	RIC1	Dal81-independent	Stp2-dependent
CR_09060W_A	228.414	-1.12146	0.189494	-5.91819	3.25499e-09	8.42146e-09	depleted	CAWG_02181	Dal81-dependent	Stp2-dependent
C1_11920W_A	382.889	-1.11876	0.16439	-6.80553	1.0068e-11	3.03658e-11	depleted	CAWG_00249	Dal81-dependent	Stp2-dependent
C6_00100C_A	1809.81	-1.11864	0.129115	-8.66389	4.5594e-18	1.89738e-17	depleted	HET1	Dal81-independent	Stp2-independent
C7_04250W_A	83.1236	-1.11818	0.312218	-3.58141	0.000341745	0.000587344	depleted	TPO2	Dal81-independent	Stp2-independent
C1_08030W_A	1839.71	-1.11745	0.135491	-8.24738	1.61909e-16	6.26055e-16	depleted	PFY1	Dal81-independent	Stp2-independent
C1_12000C_A	38.7704	-1.11626	0.41975	-2.65935	0.00782921	0.0115486	depleted	CAWG_00242	Dal81-dependent	Stp2-independent
CR_08430W_A	1160.89	-1.11586	0.121925	-9.152	5.5888e-20	2.53864e-19	depleted	CAWG_02130	Dal81-independent	Stp2-independent
CR_04490C_A	188.391	-1.11384	0.210729	-5.28568	1.25237e-07	2.91717e-07	depleted	CAWG_01784	Dal81-dependent	Stp2-independent
C1_08650C_A	178.679	-1.11351	0.201037	-5.53882	3.04516e-08	7.36158e-08	depleted	FAD1	Dal81-dependent	Stp2-dependent
C4_02400C_A	126.663	-1.11335	0.244479	-4.55397	5.26438e-06	1.07161e-05	depleted	CAWG_03555	Dal81-independent	Stp2-independent
C1_14350W_A	482.897	-1.11204	0.168557	-6.59737	4.1851e-11	1.21526e-10	depleted	CAWG_00019	Dal81-independent	Stp2-independent
CR_09810W_A	92.7253	-1.11154	0.275212	-4.03884	5.37151e-05	9.95553e-05	depleted	CAWG_02246	Dal81-independent	Stp2-independent
C6_04510C_A	505.138	-1.11099	0.153795	-7.22384	5.05412e-13	1.63965e-12	depleted	CAWG_04930	Dal81-dependent	Stp2-dependent
C1_03210C_A	1359.57	-1.10913	0.152347	-7.28032	3.3303e-13	1.09043e-12	depleted	CDC12	Dal81-dependent	Stp2-dependent
CR_07560W_A	354.437	-1.10856	0.191932	-5.7758	7.65883e-09	1.93403e-08	depleted	RGD3	Dal81-dependent	Stp2-dependent
C2_08130W_A	761.479	-1.10657	0.178386	-6.20319	5.53287e-10	1.50816e-09	depleted	ARA1	Dal81-dependent	Stp2-dependent
C4_03370C_A	187.212	-1.10515	0.21267	-5.19653	2.0304e-07	4.64302e-07	depleted	CAWG_03471	Dal81-independent	Stp2-dependent
CR_09470W_A	198.174	-1.1045	0.269533	-4.09783	4.17041e-05	7.82359e-05	depleted	AXL1	Dal81-dependent	Stp2-dependent
C5_00070W_A	1039.07	-1.10427	0.130757	-8.44515	3.03645e-17	1.21722e-16	depleted	CDC11	Dal81-independent	Stp2-independent
C3_01510W_A	433.837	-1.10372	0.149273	-7.39399	1.42488e-13	4.75886e-13	depleted	CAWG_02482	Dal81-dependent	Stp2-dependent
C5_05310W_A	1439.97	-1.10058	0.118538	-9.28461	1.62294e-20	7.57833e-20	depleted	PRE1	Dal81-dependent	Stp2-independent
C6_04120C_A	189.441	-1.10031	0.192408	-5.71861	1.07398e-08	2.68607e-08	depleted	CAWG_04968	Dal81-independent	Stp2-independent
C1_03220C_A	11014.8	-1.10012	0.103913	-10.5869	3.42585e-26	1.97052e-25	depleted	BMH1	Dal81-independent	Stp2-independent
C3_00520W_A	393.515	-1.10002	0.171528	-6.41304	1.4265e-10	4.02545e-10	depleted	CAWG_02387	Dal81-dependent	Stp2-independent
CR_10290C_A	513.709	-1.09965	0.139773	-7.8674	3.62087e-15	1.31459e-14	depleted	CAWG_02288	Dal81-independent	Stp2-independent
C3_02240C_A	729.559	-1.09744	0.138325	-7.93378	2.12569e-15	7.80241e-15	depleted	GPA2	Dal81-dependent	Stp2-dependent
C4_04320W_A	4781.97	-1.09516	0.141393	-7.74548	9.52236e-15	3.38154e-14	depleted	FRE10	Dal81-dependent	Stp2-dependent
C1_03390W_A	1656.02	-1.09431	0.158526	-6.90301	5.09105e-12	1.5574e-11	depleted	EHT1	Dal81-dependent	Stp2-dependent
C4_05560C_A	200.873	-1.09209	0.227128	-4.80825	1.52257e-06	3.23419e-06	depleted	ARO9	Dal81-independent	Stp2-independent
CR_05310W_A	383.95	-1.09193	0.195158	-5.59511	2.20483e-08	5.4063e-08	depleted	CAWG_01860	Dal81-independent	Stp2-dependent
C3_07020W_A	2473.31	-1.09159	0.129705	-8.41598	3.89609e-17	1.55249e-16	depleted	SSN6	Dal81-independent	Stp2-independent
C1_00320W_A	382.936	-1.09148	0.172264	-6.33608	2.35689e-10	6.59821e-10	depleted	CAWG_01340	Dal81-independent	Stp2-independent
C1_10710C_A	80.6878	-1.09092	0.34503	-3.16183	0.00156783	0.00250261	depleted	CAWG_00361	Dal81-independent	Stp2-independent
CR_07590W_A	964.178	-1.0909	0.131878	-8.27202	1.31711e-16	5.12256e-16	depleted	EMP24	Dal81-independent	Stp2-independent
CR_01080W_A	779.965	-1.09045	0.145347	-7.50242	6.26518e-14	2.13038e-13	depleted	CAWG_01461	Dal81-independent	Stp2-independent
C2_00240C_A	353.487	-1.0903	0.183208	-5.95117	2.66233e-09	6.93413e-09	depleted	SOD6	Dal81-dependent	Stp2-dependent
CR_00770W_A	154.943	-1.08924	0.226936	-4.79976	1.58858e-06	3.36606e-06	depleted	CAWG_01435	Dal81-independent	Stp2-independent
C4_00700C_A	679.289	-1.08918	0.149078	-7.3061	2.75001e-13	9.05859e-13	depleted	CAWG_03711	Dal81-dependent	Stp2-dependent
C1_06930W_A	2737.1	-1.08782	0.131613	-8.26531	1.39331e-16	5.40493e-16	depleted	PGA63	Dal81-independent	Stp2-dependent
CR_02790C_A	130.197	-1.08701	0.229037	-4.74601	2.07472e-06	4.35314e-06	depleted	ALG5	Dal81-dependent	Stp2-dependent
C1_01200W_A	368.14	-1.0868	0.155959	-6.9685	3.20327e-12	9.87456e-12	depleted	STB5	Dal81-independent	Stp2-independent
C1_14170W_A	1472.64	-1.08652	0.132197	-8.21895	2.05298e-16	7.88244e-16	depleted	CAWG_00037	Dal81-independent	Stp2-independent
C1_02020W_A	228.475	-1.08643	0.206792	-5.25375	1.4903e-07	3.44601e-07	depleted	CAWG_01180	Dal81-independent	Stp2-independent
C2_08810C_A	8584.49	-1.08579	0.118622	-9.1534	5.51675e-20	2.5078e-19	depleted	IPP1	Dal81-independent	Stp2-independent
C3_06710W_A	661.353	-1.08489	0.178697	-6.07111	1.27028e-09	3.37972e-09	depleted	CAWG_02981	Dal81-dependent	Stp2-dependent
C5_00060C_A	797.993	-1.08428	0.166881	-6.49735	8.17468e-11	2.3398e-10	depleted	CAWG_04402	Dal81-dependent	Stp2-dependent
C3_00240C_A	1761.68	-1.08352	0.128237	-8.44935	2.92917e-17	1.17578e-16	depleted	GLO3	Dal81-dependent	Stp2-dependent
C4_06030W_A	2417.73	-1.08158	0.119866	-9.02322	1.82638e-19	8.14208e-19	depleted	CMD1	Dal81-independent	Stp2-independent
C6_03760C_A	7090.22	-1.08107	0.114144	-9.47106	2.77029e-21	1.34158e-20	depleted	SHM2	Dal81-dependent	Stp2-independent
C4_06600W_A	1029.05	-1.08066	0.126227	-8.56122	1.11677e-17	4.55583e-17	depleted	TOP2	Dal81-independent	Stp2-independent
C2_07470W_A	902.959	-1.07962	0.131487	-8.21085	2.1963e-16	8.42197e-16	depleted	YCS4	Dal81-independent	Stp2-independent
CR_00270C_A	270.698	-1.07907	0.212704	-5.07309	3.91401e-07	8.76021e-07	depleted	CAWG_01388	Dal81-dependent	Stp2-dependent
C2_05070W_A	256.767	-1.07885	0.21898	-4.92669	8.36351e-07	1.82363e-06	depleted	FRE9	Dal81-dependent	Stp2-dependent
C7_04120W_A	155.921	-1.07862	0.205696	-5.24376	1.57336e-07	3.62688e-07	depleted	CAWG_05741	Dal81-independent	Stp2-independent
C4_00570C_A	919.535	-1.0773	0.124629	-8.64403	5.42637e-18	2.24572e-17	depleted	PCT1	Dal81-independent	Stp2-independent
CR_05430W_A	34.7659	-1.07632	0.444888	-2.41931	0.0155498	0.0220072	depleted	CSP1	Dal81-independent	Stp2-independent
C6_00240C_A	360.453	-1.07632	0.192244	-5.59871	2.15947e-08	5.2994e-08	depleted	CAWG_05334	Dal81-dependent	Stp2-independent
CR_01730W_A	1519.82	-1.07587	0.120542	-8.92531	4.44466e-19	1.94677e-18	depleted	IFU5	Dal81-dependent	Stp2-dependent
C1_13660W_A	324.739	-1.07573	0.174952	-6.14874	7.80996e-10	2.10403e-09	depleted	RAD54	Dal81-independent	Stp2-independent
C1_07670W_A	32.6086	-1.07466	0.466163	-2.30533	0.0211483	0.0294516	depleted	ZCF4	Dal81-dependent	Stp2-dependent
C4_07050W_A	200.797	-1.07382	0.199096	-5.39349	6.91023e-08	1.63628e-07	depleted	YDC1	Dal81-dependent	Stp2-dependent
CR_06900C_A	257.363	-1.07339	0.192541	-5.57488	2.47706e-08	6.04174e-08	depleted	ALG6	Dal81-dependent	Stp2-dependent
C4_03350C_A	213.723	-1.07315	0.241057	-4.45187	8.51275e-06	1.70454e-05	depleted	AIF1	Dal81-independent	Stp2-independent
C7_01730C_A	25.1169	-1.07105	0.465126	-2.3027	0.0212957	0.0296363	depleted	STE18	Dal81-independent	Stp2-dependent
C2_06760C_A	89.6154	-1.06909	0.269783	-3.96278	7.40808e-05	0.000135751	depleted	CAWG_05775	Dal81-independent	Stp2-independent
CR_08710W_A	1120.78	-1.06825	0.1375	-7.76912	7.90318e-15	2.82148e-14	depleted	orf19.6448	Dal81-independent	Stp2-independent
C1_09440W_A	273.917	-1.0671	0.180519	-5.9113	3.39424e-09	8.77795e-09	depleted	CAWG_00485	Dal81-dependent	Stp2-dependent
CR_07490C_A	639.192	-1.06603	0.135035	-7.89447	2.91558e-15	1.06561e-14	depleted	GLK4	Dal81-dependent	Stp2-dependent
CR_10350C_A	4816.34	-1.06567	0.104713	-10.1771	2.50921e-24	1.36732e-23	depleted	TRX1	Dal81-independent	Stp2-independent
C4_02520C_A	166.72	-1.06501	0.216411	-4.92124	8.59984e-07	1.87244e-06	depleted	CAWG_03543	Dal81-independent	Stp2-independent
CR_06540W_A	236.551	-1.0646	0.195516	-5.44509	5.178e-08	1.23438e-07	depleted	KIP1	Dal81-independent	Stp2-independent
C1_14420W_A	1415.94	-1.06372	0.140213	-7.58648	3.28714e-14	1.13184e-13	depleted	DDI1	Dal81-independent	Stp2-independent
C1_11170W_A	1375.86	-1.06357	0.118222	-8.99635	2.33356e-19	1.03493e-18	depleted	WBP1	Dal81-independent	Stp2-independent
C2_00270C_A	372.734	-1.06355	0.196676	-5.40765	6.38572e-08	1.51446e-07	depleted	CAWG_03807	Dal81-independent	Stp2-independent
C1_01250W_A	841.318	-1.06279	0.130713	-8.13077	4.26563e-16	1.61507e-15	depleted	CAWG_01251	Dal81-dependent	Stp2-dependent
C1_02300W_A	124.417	-1.06242	0.248541	-4.27462	1.91462e-05	3.716e-05	depleted	CAWG_01153	Dal81-independent	Stp2-independent
C4_06100W_A	720.649	-1.06136	0.14985	-7.08283	1.41241e-12	4.45034e-12	depleted	CWH41	Dal81-independent	Stp2-dependent
C1_13960W_A	1170.97	-1.06068	0.132801	-7.98698	1.38289e-15	5.12294e-15	depleted	YBP1	Dal81-independent	Stp2-independent
CR_10110W_A	1115.47	-1.06066	0.170342	-6.22664	4.76529e-10	1.30964e-09	depleted	CHT3	Dal81-independent	Stp2-independent
C2_04580W_A	1412.66	-1.05926	0.137136	-7.72414	1.12614e-14	3.97792e-14	depleted	ERG20	Dal81-independent	Stp2-dependent
CR_00920W_A	29.0918	-1.05866	0.474114	-2.23292	0.0255544	0.0351878	depleted	CCE1	Dal81-independent	Stp2-dependent
C4_00130W_A	1182.02	-1.05853	0.415571	-2.54716	0.0108602	0.0156844	depleted	RBT5	Dal81-dependent	Stp2-dependent
CR_06850C_A	53.3728	-1.05592	0.374646	-2.81846	0.00482547	0.00731372	depleted	CAWG_01984	Dal81-independent	Stp2-independent
C2_00380C_A	1638.67	-1.05536	0.134468	-7.84841	4.21342e-15	1.52144e-14	depleted	RFA1	Dal81-independent	Stp2-dependent
C4_00020W_A	2436.76	-1.05422	0.119989	-8.78597	1.5502e-18	6.62087e-18	depleted	VMA6	Dal81-independent	Stp2-independent
CR_01640C_A	79.7944	-1.05248	0.295469	-3.56205	0.000367966	0.000630064	depleted	orf19.2553	Dal81-independent	Stp2-independent
CR_04190W_A	2628.32	-1.05243	0.121826	-8.63877	5.68191e-18	2.34824e-17	depleted	SRV2	Dal81-dependent	Stp2-dependent
C1_12650C_A	507.611	-1.05026	0.155475	-6.75519	1.42644e-11	4.26795e-11	depleted	CAWG_00177	Dal81-independent	Stp2-independent
C3_04090W_A	8017.61	-1.0484	0.104268	-10.0548	8.7516e-24	4.65898e-23	depleted	SBP1	Dal81-independent	Stp2-independent
C2_04410W_A	209.9	-1.04835	0.195807	-5.35403	8.60171e-08	2.02245e-07	depleted	CAWG_04197	Dal81-independent	Stp2-independent
C3_07340W_A	1728.73	-1.04835	0.12299	-8.52392	1.54239e-17	6.23705e-17	depleted	GCY1	Dal81-dependent	Stp2-dependent
C1_05920W_A	35.9306	-1.04817	0.398017	-2.63349	0.00845129	0.0124144	depleted	CAWG_00815	Dal81-dependent	Stp2-dependent
C4_01310W_A	109.657	-1.04778	0.278834	-3.75772	0.000171472	0.000304731	depleted	CAWG_03653	Dal81-independent	Stp2-independent
C2_09550C_A	26.3505	-1.0476	0.464427	-2.25569	0.02409	0.0332706	depleted	snR68	Dal81-dependent	Stp2-dependent
C4_01870C_A	851.776	-1.04737	0.133982	-7.81726	5.39855e-15	1.94122e-14	depleted	ERG8	Dal81-independent	Stp2-independent
C4_04380C_A	97.4772	-1.04712	0.253883	-4.12441	3.71686e-05	7.00777e-05	depleted	orf19.1409.2	Dal81-dependent	Stp2-dependent
C5_05260W_A	115.652	-1.04622	0.243856	-4.29031	1.78423e-05	3.48093e-05	depleted	PSY4	Dal81-independent	Stp2-independent
CR_07290W_A	172.363	-1.04564	0.256317	-4.07946	4.51398e-05	8.41553e-05	depleted	FRE7	Dal81-independent	Stp2-independent
C3_02980C_A	64.7806	-1.04513	0.323331	-3.23238	0.00122762	0.00198329	depleted	CAWG_02618	Dal81-independent	Stp2-independent
C1_14180W_A	176.855	-1.04403	0.277661	-3.76009	0.000169854	0.000301945	depleted	CAWG_00036	Dal81-dependent	Stp2-dependent
C7_04240C_A	1683.6	-1.04385	0.135831	-7.68487	1.53148e-14	5.35616e-14	depleted	CAWG_05753	Dal81-dependent	Stp2-dependent
C3_03170W_A	1403.81	-1.04089	0.132531	-7.85393	4.03206e-15	1.45771e-14	depleted	SEC13	Dal81-independent	Stp2-independent
C2_03170W_A	113.001	-1.03983	0.254345	-4.08826	4.34629e-05	8.12561e-05	depleted	CAWG_04084	Dal81-independent	Stp2-independent
C5_04420W_A	592.172	-1.03913	0.148013	-7.02055	2.20993e-12	6.89384e-12	depleted	CAWG_04814	Dal81-dependent	Stp2-dependent
C6_00230W_A	299.578	-1.0373	0.170371	-6.08845	1.14006e-09	3.04134e-09	depleted	CAWG_05335	Dal81-independent	Stp2-independent
C3_06810W_A	442.317	-1.0366	0.178164	-5.81824	5.94693e-09	1.51383e-08	depleted	CAWG_02992	Dal81-independent	Stp2-independent
C1_00070W_A	3795.11	-1.03573	0.116583	-8.88407	6.44604e-19	2.80496e-18	depleted	MVD	Dal81-independent	Stp2-independent
C2_00970C_A	1120.26	-1.03563	0.140222	-7.38564	1.51727e-13	5.05899e-13	depleted	UBP13	Dal81-independent	Stp2-independent
C1_04960C_A	373.736	-1.03478	0.16636	-6.22009	4.9687e-10	1.36429e-09	depleted	CAWG_00901	Dal81-independent	Stp2-independent
C7_01050W_A	48.5572	-1.03464	0.359567	-2.87747	0.00400878	0.00613317	depleted	CAWG_05463	Dal81-independent	Stp2-independent
C4_05860W_A	274.351	-1.03415	0.180714	-5.72259	1.04913e-08	2.6261e-08	depleted	orf19.1273	Dal81-independent	Stp2-independent
C6_01150W_A	308.935	-1.0338	0.177411	-5.82715	5.63825e-09	1.43708e-08	depleted	CDC20	Dal81-dependent	Stp2-independent
C7_01830W_A	123.168	-1.03338	0.24601	-4.20055	2.66262e-05	5.10506e-05	depleted	CAWG_05534	Dal81-independent	Stp2-independent
C3_03690W_A	106.596	-1.03298	0.310521	-3.3266	0.000879139	0.00144439	depleted	CAWG_02686	Dal81-dependent	Stp2-dependent
C1_11640C_A	218.586	-1.0328	0.200601	-5.14854	2.62525e-07	5.94666e-07	depleted	DPP2	Dal81-independent	Stp2-independent
C2_00480C_A	181.847	-1.03212	0.216935	-4.75775	1.9576e-06	4.11892e-06	depleted	PHHB	Dal81-independent	Stp2-dependent
C1_12200W_A	387.847	-1.03203	0.176102	-5.8604	4.61759e-09	1.1865e-08	depleted	MCD4	Dal81-independent	Stp2-independent
C1_06620C_A	124.647	-1.02947	0.258765	-3.97841	6.93766e-05	0.000127208	depleted	CAWG_00750	Dal81-dependent	Stp2-dependent
C1_03550C_A	1476.2	-1.02906	0.126933	-8.10712	5.1832e-16	1.95509e-15	depleted	COQ6	Dal81-independent	Stp2-independent
C2_07880W_A	268.547	-1.02878	0.194173	-5.29826	1.1691e-07	2.72957e-07	depleted	APM4	Dal81-independent	Stp2-independent
C1_00080C_A	1342.58	-1.02838	0.145131	-7.08585	1.3819e-12	4.36065e-12	depleted	RCA1	Dal81-independent	Stp2-independent
C6_01180C_A	87.0161	-1.02833	0.269039	-3.82225	0.000132242	0.000236978	depleted	EBP1	Dal81-independent	Stp2-independent
C2_09780C_A	872.766	-1.02823	0.130241	-7.89478	2.90834e-15	1.06362e-14	depleted	CAWG_06051	Dal81-independent	Stp2-dependent
CR_09720W_A	59.467	-1.02803	0.317401	-3.23891	0.00119987	0.00194002	depleted	VMA22	Dal81-independent	Stp2-independent
C2_04040C_A	400.091	-1.02754	0.15868	-6.47554	9.44725e-11	2.69121e-10	depleted	DCK2	Dal81-independent	Stp2-independent
C3_07740W_A	1193.23	-1.0274	0.134087	-7.66217	1.82824e-14	6.37549e-14	depleted	CAWG_03080	Dal81-independent	Stp2-independent
C3_01950C_A	626.811	-1.02674	0.145745	-7.04475	1.85789e-12	5.8168e-12	depleted	CAWG_02523	Dal81-independent	Stp2-independent
C1_12900W_A	256.466	-1.02585	0.173189	-5.9233	3.15538e-09	8.1708e-09	depleted	CAWG_00152	Dal81-independent	Stp2-independent
C4_07240W_A	462.47	-1.02491	0.166736	-6.1469	7.90096e-10	2.12759e-09	depleted	CAWG_03106	Dal81-independent	Stp2-independent
CR_06660W_A	614.782	-1.02369	0.180922	-5.65819	1.52978e-08	3.79444e-08	depleted	SEO1	Dal81-dependent	Stp2-independent
C4_04280C_A	101.87	-1.02221	0.270972	-3.7724	0.000161685	0.000288106	depleted	CAWG_03379	Dal81-independent	Stp2-independent
C3_07540C_A	476.923	-1.02221	0.149537	-6.8358	8.15467e-12	2.47317e-11	depleted	CAWG_03060	Dal81-independent	Stp2-independent
C6_04540C_A	724.638	-1.02199	0.134781	-7.5826	3.38706e-14	1.16558e-13	depleted	HAT2	Dal81-independent	Stp2-independent
CR_05360C_A	174.885	-1.02092	0.2345	-4.3536	1.33918e-05	2.64011e-05	depleted	CAWG_01863	Dal81-independent	Stp2-dependent
C1_10750C_A	321.42	-1.02072	0.165184	-6.17933	6.43736e-10	1.74679e-09	depleted	orf19.2343.1	Dal81-independent	Stp2-independent
CR_10590W_A	662.591	-1.01951	0.141919	-7.18371	6.78466e-13	2.18104e-12	depleted	CAWG_02316	Dal81-independent	Stp2-independent
CR_08610W_A	837.544	-1.01892	0.123853	-8.22685	1.92193e-16	7.39348e-16	depleted	CAWG_02146	Dal81-independent	Stp2-independent
C2_00580C_A	939.897	-1.01565	0.130154	-7.80344	6.02426e-15	2.16233e-14	depleted	SMF3	Dal81-independent	Stp2-independent
C7_00890C_A	724.967	-1.01495	0.152565	-6.65257	2.88012e-11	8.4614e-11	depleted	MCM1	Dal81-independent	Stp2-independent
C4_02510W_A	291.207	-1.0127	0.179059	-5.65565	1.5526e-08	3.84945e-08	depleted	CAWG_03544	Dal81-independent	Stp2-independent
C1_06650W_A	448.311	-1.01221	0.145378	-6.96264	3.33959e-12	1.0279e-11	depleted	NAA20	Dal81-independent	Stp2-independent
C1_05240C_A	2030.05	-1.01218	0.110303	-9.17639	4.45804e-20	2.04199e-19	depleted	RPT1	Dal81-dependent	Stp2-dependent
C1_09270W_A	166.397	-1.01144	0.235152	-4.30124	1.69844e-05	3.32112e-05	depleted	FGR43	Dal81-independent	Stp2-independent
C2_00010W_A	781.161	-1.0113	0.171394	-5.90042	3.62584e-09	9.36079e-09	depleted	TLO5	Dal81-independent	Stp2-independent
C3_03520C_A	875.602	-1.01124	0.128789	-7.85188	4.0983e-15	1.48077e-14	depleted	PRE9	Dal81-independent	Stp2-dependent
C3_06750W_A	800.297	-1.01026	0.140785	-7.17594	7.18126e-13	2.30607e-12	depleted	CAWG_02986	Dal81-independent	Stp2-independent
C3_03120C_A	62.8639	-1.00972	0.367775	-2.74548	0.00604223	0.00904152	depleted	DAL5	Dal81-independent	Stp2-independent
C1_00670C_A	256.396	-1.00863	0.195931	-5.14788	2.63444e-07	5.96523e-07	depleted	UGA32	Dal81-dependent	Stp2-dependent
CR_00170W_A	516.043	-1.00854	0.165452	-6.09569	1.08967e-09	2.90822e-09	depleted	ZCF38	Dal81-independent	Stp2-independent
C3_05010C_A	314.649	-1.00685	0.209602	-4.80364	1.55807e-06	3.30374e-06	depleted	CAWG_02813	Dal81-independent	Stp2-independent
CR_02500W_A	209.563	-1.00635	0.21397	-4.70324	2.56065e-06	5.33729e-06	depleted	CAWG_01590	Dal81-independent	Stp2-independent
C3_04950W_A	4042.2	-1.00589	0.112599	-8.93337	4.13215e-19	1.81385e-18	depleted	ARF2	Dal81-independent	Stp2-independent
C1_02380C_A	97.1969	-1.00565	0.313752	-3.20522	0.00134958	0.00217039	depleted	CAWG_01146	Dal81-independent	Stp2-independent
CR_07330W_A	291.554	-1.00562	0.184571	-5.44842	5.08201e-08	1.21245e-07	depleted	SMX4	Dal81-independent	Stp2-independent
C4_01530C_A	7452.02	-1.00502	0.138888	-7.23623	4.6133e-13	1.50151e-12	depleted	ERG251	Dal81-independent	Stp2-independent
C1_05250W_A	1771.48	-1.00476	0.115096	-8.72974	2.55248e-18	1.07412e-17	depleted	CAWG_00876	Dal81-independent	Stp2-independent
C3_04140C_A	4249.73	-1.00382	0.118534	-8.4686	2.4835e-17	9.98222e-17	depleted	EGD2	Dal81-independent	Stp2-independent
C1_12430W_A	404.477	-1.00379	0.159216	-6.30457	2.88998e-10	8.04185e-10	depleted	CAWG_00198	Dal81-independent	Stp2-dependent
C2_05650W_A	684.291	-1.00304	0.148106	-6.77247	1.266e-11	3.79926e-11	depleted	VPS35	Dal81-dependent	Stp2-dependent
C1_10790W_A	7267.85	-1.00216	0.105295	-9.51769	1.77073e-21	8.6099e-21	depleted	CDC48	Dal81-dependent	Stp2-dependent
C3_03140C_A	47.671	-1.0019	0.408422	-2.4531	0.0141633	0.0201398	depleted	DAL4	Dal81-independent	Stp2-independent
C1_11980W_A	166.969	-1.00145	0.19771	-5.06525	4.07873e-07	9.1119e-07	depleted	MED10	Dal81-independent	Stp2-independent
C4_01510W_A	1243.65	-1.00079	0.127155	-7.87062	3.52886e-15	1.28375e-14	depleted	CAWG_03633	Dal81-independent	Stp2-independent
C4_01190W_A	1345.29	1.00266	0.142856	7.01868	2.23967e-12	6.98298e-12	enriched	CAS5	Dal81-independent	Stp2-independent
C5_04280C_A	1615.47	1.00398	0.119549	8.39806	4.53934e-17	1.80282e-16	enriched	GLN3	Dal81-dependent	Stp2-independent
C4_02880C_A	433.948	1.00529	0.164355	6.11656	9.56197e-10	2.56109e-09	enriched	CAWG_03510	Dal81-dependent	Stp2-dependent
C4_02540W_A	172.714	1.00534	0.197219	5.09757	3.44047e-07	7.72049e-07	enriched	RGT1	Dal81-independent	Stp2-independent
C2_10170C_A	608.155	1.00621	0.159828	6.29556	3.06295e-10	8.49955e-10	enriched	CAWG_06088	Dal81-independent	Stp2-dependent
C7_00860W_A	4003.57	1.00749	0.143293	7.03101	2.05048e-12	6.40976e-12	enriched	SSR1	Dal81-independent	Stp2-independent
C6_03690W_A	590.606	1.00787	0.143995	6.99934	2.57176e-12	7.98522e-12	enriched	ALS5	Dal81-dependent	Stp2-dependent
C7_01550W_A	1828.77	1.0096	0.12394	8.14586	3.76604e-16	1.43043e-15	enriched	BEM2	Dal81-independent	Stp2-independent
CR_00010C_A	415.299	1.01005	0.153899	6.56302	5.27296e-11	1.52158e-10	enriched	CAWG_02345	Dal81-dependent	Stp2-dependent
C5_03600W_A	820.444	1.01082	0.138774	7.28395	3.2419e-13	1.06206e-12	enriched	MDJ1	Dal81-dependent	Stp2-dependent
C1_08710W_A	253.452	1.01102	0.19975	5.06144	4.16101e-07	9.28879e-07	enriched	CAWG_00554	Dal81-dependent	Stp2-dependent
C3_04630W_A	246.715	1.01108	0.213007	4.74669	2.06776e-06	4.34006e-06	enriched	CAWG_02776	Dal81-independent	Stp2-dependent
C3_06320W_A	269.649	1.01751	0.213495	4.76598	1.87936e-06	3.95984e-06	enriched	ALS7	Dal81-independent	Stp2-independent
C5_02810W_A	144.497	1.01811	0.223735	4.55051	5.35173e-06	1.08902e-05	enriched	CAWG_04664	Dal81-dependent	Stp2-dependent
C4_02130W_A	187.573	1.01819	0.230071	4.42557	9.61871e-06	1.91768e-05	enriched	CYT2	Dal81-independent	Stp2-independent
C3_04430W_A	3236.9	1.01925	0.156367	6.51836	7.10821e-11	2.04038e-10	enriched	RIP1	Dal81-independent	Stp2-independent
C6_03180C_A	2421.3	1.01988	0.114735	8.889	6.16617e-19	2.68512e-18	enriched	CAWG_05052	Dal81-dependent	Stp2-dependent
C1_03560C_A	2059.74	1.0212	0.119491	8.54622	1.27189e-17	5.1781e-17	enriched	SUA71	Dal81-independent	Stp2-independent
C2_04370W_A	1421.51	1.0217	0.159009	6.42542	1.31506e-10	3.71972e-10	enriched	CAWG_04193	Dal81-independent	Stp2-independent
C7_02860C_A	1787.7	1.02194	0.123934	8.24586	1.63974e-16	6.32816e-16	enriched	orf19.5175	Dal81-independent	Stp2-independent
C5_00800C_A	3953.8	1.02314	0.143818	7.11414	1.12612e-12	3.57606e-12	enriched	CAWG_04473	Dal81-dependent	Stp2-independent
C1_13330C_A	1498.99	1.02497	0.123388	8.30683	9.82894e-17	3.84764e-16	enriched	CAWG_00117	Dal81-dependent	Stp2-independent
CR_07740W_A	499.867	1.02552	0.242412	4.23049	2.33184e-05	4.48804e-05	enriched	orf19.2633.1	Dal81-dependent	Stp2-dependent
CR_08670C_A	302.704	1.0264	0.172208	5.96027	2.51821e-09	6.57187e-09	enriched	CAWG_02154	Dal81-independent	Stp2-independent
C3_07630C_A	620.438	1.02728	0.14068	7.30224	2.83016e-13	9.30728e-13	enriched	orf19.6726	Dal81-independent	Stp2-independent
CR_05250C_A	158.279	1.02773	0.234168	4.38886	1.13945e-05	2.25897e-05	enriched	FGR13	Dal81-independent	Stp2-independent
C4_05350W_A	259.033	1.03044	0.228273	4.5141	6.35867e-06	1.28392e-05	enriched	CAWG_03279	Dal81-independent	Stp2-independent
C7_01970C_A	3763.9	1.03085	0.152922	6.74103	1.57267e-11	4.69379e-11	enriched	TOM40	Dal81-independent	Stp2-independent
C5_04350C_A	790.364	1.03109	0.158636	6.49972	8.04701e-11	2.30435e-10	enriched	CAWG_04807	Dal81-dependent	Stp2-dependent
C5_04950C_A	466.558	1.03177	0.155709	6.62626	3.44301e-11	1.00561e-10	enriched	CAWG_04861	Dal81-independent	Stp2-independent
C2_01690W_A	1590.57	1.03288	0.142712	7.23752	4.56972e-13	1.48813e-12	enriched	CAWG_03941	Dal81-independent	Stp2-independent
CR_02560C_A	1017.56	1.03522	0.150714	6.86879	6.47486e-12	1.97268e-11	enriched	ASG1	Dal81-independent	Stp2-independent
C7_01070C_A	651.774	1.03676	0.153574	6.75088	1.46952e-11	4.39028e-11	enriched	CAWG_05465	Dal81-independent	Stp2-independent
C7_04030C_A	1748.92	1.03892	0.116665	8.90516	5.33087e-19	2.32644e-18	enriched	KAP120	Dal81-independent	Stp2-independent
C5_03550W_A	3701.8	1.0403	0.124492	8.35634	6.46927e-17	2.55075e-16	enriched	CAWG_04728	Dal81-dependent	Stp2-independent
C4_06370C_A	326.386	1.04043	0.165179	6.2988	2.99954e-10	8.33514e-10	enriched	CAWG_03190	Dal81-dependent	Stp2-dependent
CR_05140W_A	185.054	1.04119	0.205282	5.07198	3.93688e-07	8.8081e-07	enriched	CAWG_01846	Dal81-independent	Stp2-independent
C2_02390W_A	380.285	1.04166	0.195609	5.32522	1.00832e-07	2.36338e-07	enriched	CAWG_04007	Dal81-independent	Stp2-independent
C1_13060C_A	1789.74	1.04227	0.185857	5.6079	2.04802e-08	5.03618e-08	enriched	CAWG_00142	Dal81-independent	Stp2-independent
C3_04200W_A	197.663	1.04319	0.227457	4.58633	4.51108e-06	9.23909e-06	enriched	AFP99	Dal81-independent	Stp2-dependent
C1_10480W_A	574.546	1.04518	0.156351	6.68481	2.31224e-11	6.84328e-11	enriched	DJP1	Dal81-independent	Stp2-independent
C6_03360C_A	208.621	1.04524	0.262529	3.98144	6.85002e-05	0.00012564	enriched	CAWG_05034	Dal81-dependent	Stp2-dependent
C4_05980C_A	292.103	1.0498	0.170885	6.14334	8.08062e-10	2.17402e-09	enriched	CAWG_03226	Dal81-dependent	Stp2-dependent
C1_07910C_A	1059.59	1.05116	0.151706	6.92894	4.24007e-12	1.29906e-11	enriched	MRPL3	Dal81-independent	Stp2-independent
C4_04700W_A	5748.24	1.05119	0.132474	7.93506	2.104e-15	7.73227e-15	enriched	SSZ1	Dal81-dependent	Stp2-dependent
CR_01700C_A	812.78	1.05174	0.135828	7.74316	9.69731e-15	3.44163e-14	enriched	CAWG_01520	Dal81-dependent	Stp2-dependent
C6_03400C_A	1477.61	1.0518	0.141701	7.42267	1.14782e-13	3.85279e-13	enriched	QCR7	Dal81-independent	Stp2-independent
C1_08090C_A	4812.36	1.05408	0.154013	6.84409	7.6964e-12	2.33537e-11	enriched	FUN12	Dal81-independent	Stp2-independent
C4_02280W_A	2045.54	1.05618	0.141514	7.46342	8.4305e-14	2.84731e-13	enriched	IDI1	Dal81-independent	Stp2-independent
CR_04780W_A	607.006	1.05972	0.136976	7.73653	1.02167e-14	3.62169e-14	enriched	RPB8	Dal81-dependent	Stp2-dependent
C1_02990C_A	749.255	1.06151	0.171967	6.17277	6.71039e-10	1.81841e-09	enriched	XOG1	Dal81-dependent	Stp2-dependent
C1_03910C_A	317.595	1.06175	0.202552	5.24188	1.58952e-07	3.66273e-07	enriched	CAWG_01002	Dal81-independent	Stp2-independent
C1_03900W_A	155.037	1.06195	0.230155	4.61404	3.94914e-06	8.13537e-06	enriched	SEN15	Dal81-dependent	Stp2-dependent
C1_09690W_A	4605.8	1.06224	0.15652	6.78659	1.14814e-11	3.45073e-11	enriched	MLS1	Dal81-dependent	Stp2-dependent
C5_02720W_A	329.519	1.06248	0.176106	6.03317	1.60772e-09	4.24742e-09	enriched	PEP12	Dal81-independent	Stp2-independent
C1_05330C_A	302.728	1.06269	0.172748	6.15167	7.66691e-10	2.06735e-09	enriched	CAWG_00868	Dal81-dependent	Stp2-dependent
CR_08940W_A	673.644	1.06303	0.149255	7.12219	1.06228e-12	3.38227e-12	enriched	orf19.7291	Dal81-dependent	Stp2-dependent
C1_08210C_A	2636.85	1.06318	0.129044	8.23887	1.73849e-16	6.69638e-16	enriched	MLT1	Dal81-dependent	Stp2-dependent
C1_12100C_A	311.602	1.06328	0.177228	5.99947	1.97962e-09	5.20019e-09	enriched	PXA2	Dal81-dependent	Stp2-dependent
C2_10540W_A	633.712	1.06475	0.142599	7.46673	8.22114e-14	2.77816e-13	enriched	CAWG_06116	Dal81-dependent	Stp2-dependent
CR_03840C_A	100.343	1.06636	0.245898	4.3366	1.44706e-05	2.84532e-05	enriched	CAWG_01720	Dal81-dependent	Stp2-dependent
C1_05010C_A	709.125	1.06738	0.131009	8.14736	3.71954e-16	1.41366e-15	enriched	CAWG_00896	Dal81-independent	Stp2-independent
CR_09860W_A	928.749	1.06813	0.12983	8.22715	1.9172e-16	7.37998e-16	enriched	YTA6	Dal81-independent	Stp2-independent
C4_00520W_A	549.337	1.0686	0.169728	6.29597	3.05489e-10	8.48109e-10	enriched	PAM18	Dal81-dependent	Stp2-independent
C5_01620C_A	232.206	1.07143	0.179283	5.97618	2.28425e-09	5.97167e-09	enriched	VPS22	Dal81-independent	Stp2-independent
C2_00620C_A	156.194	1.07161	0.21997	4.87163	1.1068e-06	2.37878e-06	enriched	CAWG_03841	Dal81-dependent	Stp2-dependent
CR_04640W_A	75.6771	1.07177	0.286546	3.74031	0.000183793	0.000324994	enriched	DIT1	Dal81-dependent	Stp2-independent
C3_00950C_A	207.841	1.07472	0.198026	5.42715	5.7262e-08	1.36181e-07	enriched	CAWG_02432	Dal81-independent	Stp2-independent
CR_03480W_A	53.4328	1.07476	0.373591	2.87684	0.00401685	0.00614396	enriched	CAWG_01683	Dal81-independent	Stp2-independent
C2_00170C_A	961.237	1.07507	0.183255	5.86652	4.45044e-09	1.14453e-08	enriched	HMA1	Dal81-dependent	Stp2-dependent
C1_01520C_A	1745.68	1.0762	0.156154	6.8919	5.5051e-12	1.67978e-11	enriched	SOD2	Dal81-independent	Stp2-independent
C1_06750W_A	167.276	1.07634	0.223002	4.82658	1.38899e-06	2.95775e-06	enriched	CAWG_00738	Dal81-dependent	Stp2-independent
C1_01870C_A	4198.43	1.07637	0.123232	8.73453	2.44666e-18	1.03466e-17	enriched	CYS4	Dal81-independent	Stp2-independent
C3_04080W_A	1814.57	1.07997	0.149201	7.23834	4.54215e-13	1.47996e-12	enriched	CAWG_02723	Dal81-independent	Stp2-independent
C3_06530W_A	266.453	1.08132	0.184747	5.85295	4.82942e-09	1.23882e-08	enriched	CAWG_02963	Dal81-independent	Stp2-dependent
C5_01190W_A	605.752	1.08134	0.162199	6.66672	2.61587e-11	7.7077e-11	enriched	CAWG_04507	Dal81-independent	Stp2-independent
C1_13140C_A	13736.9	1.08166	0.409652	2.64043	0.00827998	0.0121776	enriched	TYE7	Dal81-dependent	Stp2-dependent
C3_02480C_A	3060.49	1.08189	0.182642	5.92358	3.15008e-09	8.16059e-09	enriched	CCP1	Dal81-dependent	Stp2-dependent
C2_10190C_A	290.059	1.08196	0.194122	5.57359	2.49545e-08	6.08165e-08	enriched	OCA1	Dal81-independent	Stp2-independent
C4_05810W_A	1897.31	1.08239	0.137517	7.871	3.51817e-15	1.28118e-14	enriched	CAWG_03242	Dal81-independent	Stp2-independent
C6_04530C_A	2415.73	1.0854	0.127144	8.53677	1.3803e-17	5.60426e-17	enriched	CAWG_04928	Dal81-dependent	Stp2-dependent
C5_02260C_A	726.438	1.08578	0.133013	8.16294	3.26963e-16	1.2474e-15	enriched	PTH1	Dal81-independent	Stp2-independent
C1_10070C_A	1240.95	1.087	0.138541	7.84604	4.29382e-15	1.54954e-14	enriched	MNN23	Dal81-dependent	Stp2-dependent
C4_01220C_A	49.508	1.08707	0.342211	3.1766	0.00149012	0.00238491	enriched	CAWG_03662	Dal81-dependent	Stp2-independent
CR_10750C_A	440.589	1.08821	0.18095	6.01391	1.81101e-09	4.77818e-09	enriched	CAWG_02332	Dal81-dependent	Stp2-dependent
C1_11770C_A	2090	1.08931	0.122407	8.89909	5.63064e-19	2.45548e-18	enriched	CAWG_00260	Dal81-independent	Stp2-independent
CR_08540C_A	621.905	1.08958	0.146505	7.43715	1.02883e-13	3.45921e-13	enriched	SSY5	Dal81-independent	Stp2-independent
C7_01570C_A	174.527	1.08979	0.220999	4.9312	8.17252e-07	1.78458e-06	enriched	CAWG_05508	Dal81-dependent	Stp2-dependent
C7_01810W_A	2626.82	1.09146	0.110265	9.89849	4.22596e-23	2.18955e-22	enriched	RVB2	Dal81-dependent	Stp2-independent
C7_01590C_A	393.155	1.09645	0.166981	6.56631	5.15764e-11	1.48902e-10	enriched	CAWG_05510	Dal81-independent	Stp2-independent
C7_03220C_A	3016.88	1.09682	0.130086	8.43154	3.41135e-17	1.36386e-16	enriched	ZCF29	Dal81-dependent	Stp2-dependent
C3_07070C_A	307.048	1.09834	0.204664	5.36657	8.02502e-08	1.89427e-07	enriched	CAWG_03015	Dal81-independent	Stp2-dependent
C1_01320W_A	1579.18	1.09945	0.137179	8.01467	1.10434e-15	4.10879e-15	enriched	MRS7	Dal81-independent	Stp2-dependent
C2_09950W_A	6764.25	1.10082	0.155142	7.09552	1.28863e-12	4.07705e-12	enriched	FCY21	Dal81-dependent	Stp2-dependent
C2_08300C_A	694.71	1.10333	0.181809	6.06859	1.29036e-09	3.42858e-09	enriched	orf19.1353	Dal81-independent	Stp2-independent
C6_02650C_A	445.754	1.1038	0.151841	7.26948	3.60887e-13	1.17971e-12	enriched	CAWG_05103	Dal81-independent	Stp2-dependent
C7_01160C_A	471.306	1.10393	0.152085	7.25868	3.90884e-13	1.27568e-12	enriched	CAWG_05469	Dal81-independent	Stp2-independent
C5_02740W_A	402.467	1.10651	0.220757	5.01231	5.37793e-07	1.1908e-06	enriched	CAWG_04657	Dal81-independent	Stp2-independent
C5_03370C_A	176.74	1.10745	0.224634	4.93003	8.22182e-07	1.79469e-06	enriched	CAWG_04713	Dal81-independent	Stp2-independent
CR_10120C_A	119.891	1.10963	0.258808	4.28749	1.80707e-05	3.51876e-05	enriched	CAWG_02273	Dal81-independent	Stp2-independent
C1_11910W_A	210.8	1.1107	0.214867	5.16924	2.35046e-07	5.35451e-07	enriched	CAWG_00250	Dal81-independent	Stp2-independent
C5_02440C_A	488.646	1.11145	0.156089	7.12061	1.07453e-12	3.41949e-12	enriched	CAWG_04626	Dal81-dependent	Stp2-dependent
C5_01040W_A	63.3526	1.11146	0.348813	3.18641	0.00144052	0.00230922	enriched	CAWG_04493	Dal81-dependent	Stp2-dependent
C7_00430W_A	277.409	1.11445	0.268265	4.15429	3.26303e-05	6.19295e-05	enriched	CAWG_05400	Dal81-independent	Stp2-dependent
C3_04120C_A	316.439	1.11452	0.191906	5.80766	6.33514e-09	1.60924e-08	enriched	CAWG_02727	Dal81-independent	Stp2-dependent
C5_00420C_A	550.307	1.11477	0.199705	5.58208	2.37659e-08	5.80847e-08	enriched	MRP17	Dal81-independent	Stp2-independent
C2_03540W_A	1057.15	1.11546	0.158306	7.04618	1.83892e-12	5.76042e-12	enriched	RAD32	Dal81-independent	Stp2-independent
C1_06380C_A	224.061	1.11587	0.187505	5.95114	2.6628e-09	6.93413e-09	enriched	CAWG_00773	Dal81-dependent	Stp2-dependent
C7_00680W_A	129.356	1.11707	0.243841	4.58112	4.62481e-06	9.46558e-06	enriched	CAWG_05424	Dal81-dependent	Stp2-independent
C5_01930W_A	498.693	1.118	0.181178	6.17073	6.79738e-10	1.84115e-09	enriched	CAWG_04578	Dal81-dependent	Stp2-dependent
C5_02430W_A	119.347	1.11815	0.23315	4.79584	1.61995e-06	3.42891e-06	enriched	ZCF22	Dal81-dependent	Stp2-dependent
C4_00460C_A	1208.92	1.1185	0.120689	9.26769	1.90219e-20	8.86163e-20	enriched	CAWG_03737	Dal81-independent	Stp2-independent
C6_02750C_A	164.759	1.11895	0.222921	5.0195	5.18071e-07	1.14798e-06	enriched	LYS14	Dal81-dependent	Stp2-dependent
C3_07060W_A	1453.47	1.11958	0.164195	6.81863	9.19146e-12	2.77919e-11	enriched	FESUR1	Dal81-independent	Stp2-independent
C1_07420C_A	275.53	1.12241	0.204345	5.49268	3.95869e-08	9.51257e-08	enriched	PEX3	Dal81-independent	Stp2-independent
C6_03800C_A	1875.04	1.12423	0.135996	8.26662	1.37809e-16	5.34936e-16	enriched	CAWG_04993	Dal81-dependent	Stp2-dependent
C5_01700W_A	664.051	1.12559	0.182672	6.16177	7.19359e-10	1.94321e-09	enriched	CAWG_04555	Dal81-independent	Stp2-independent
C1_08400C_A	1382.16	1.12697	0.205748	5.47745	4.31494e-08	1.03479e-07	enriched	GCV2	Dal81-dependent	Stp2-dependent
C6_03200W_A	827.576	1.12723	0.175077	6.43847	1.2068e-10	3.41994e-10	enriched	CAWG_05050	Dal81-independent	Stp2-dependent
C3_05650W_A	2461.16	1.12826	0.112797	10.0026	1.48381e-23	7.76155e-23	enriched	YCK2	Dal81-independent	Stp2-independent
C3_01610W_A	2124.79	1.12841	0.163604	6.89718	5.30468e-12	1.6211e-11	enriched	CAWG_02493	Dal81-independent	Stp2-independent
C1_10350C_A	1167.38	1.13032	0.128541	8.79345	1.45038e-18	6.20779e-18	enriched	CAWG_00398	Dal81-independent	Stp2-independent
C4_03540C_A	397.158	1.13056	0.174118	6.49305	8.41172e-11	2.40535e-10	enriched	ECM38	Dal81-independent	Stp2-independent
C5_01490C_A	421.817	1.13061	0.17999	6.28153	3.35247e-10	9.27722e-10	enriched	CAWG_04536	Dal81-independent	Stp2-independent
C2_04110W_A	111.423	1.13086	0.256567	4.40764	1.04502e-05	2.07588e-05	enriched	CAWG_04168	Dal81-dependent	Stp2-dependent
CR_09710W_A	379.086	1.13169	0.171858	6.58504	4.5477e-11	1.31736e-10	enriched	PCD1	Dal81-dependent	Stp2-dependent
C1_11900C_A	316.535	1.13179	0.196227	5.76775	8.03351e-09	2.02524e-08	enriched	CAWG_00251	Dal81-independent	Stp2-independent
CR_08020C_A	941.488	1.1318	0.148787	7.60682	2.80919e-14	9.70609e-14	enriched	NOP10	Dal81-dependent	Stp2-dependent
C3_03550C_A	357.815	1.13259	0.159205	7.11405	1.12684e-12	3.57646e-12	enriched	ULP1	Dal81-dependent	Stp2-dependent
C1_05470W_A	339.755	1.13322	0.210793	5.37597	7.61714e-08	1.79941e-07	enriched	MTM1	Dal81-dependent	Stp2-dependent
C1_09550W_A	72.0956	1.13479	0.30598	3.70871	0.000208317	0.000366201	enriched	CAWG_00474	Dal81-dependent	Stp2-dependent
C2_05810W_A	502.447	1.14065	0.166988	6.83074	8.44787e-12	2.55951e-11	enriched	CAWG_04327	Dal81-independent	Stp2-independent
C3_06230W_A	1261.44	1.14116	0.131791	8.65883	4.76635e-18	1.98077e-17	enriched	CYM1	Dal81-independent	Stp2-independent
C2_07020C_A	186.647	1.14301	0.213097	5.36383	8.14775e-08	1.92173e-07	enriched	CAWG_05800	Dal81-dependent	Stp2-independent
C1_05090W_A	543.071	1.14394	0.145066	7.88566	3.12866e-15	1.1421e-14	enriched	TRY2	Dal81-dependent	Stp2-dependent
CR_10790W_A	252.169	1.14558	0.198941	5.75842	8.49063e-09	2.13689e-08	enriched	MAL2	Dal81-dependent	Stp2-independent
C4_06770W_A	518.59	1.14871	0.21077	5.45008	5.03468e-08	1.2026e-07	enriched	CAWG_03152	Dal81-independent	Stp2-independent
C2_07380W_A	7767.95	1.14882	0.157493	7.29444	2.99904e-13	9.84649e-13	enriched	SSC1	Dal81-dependent	Stp2-dependent
CR_09880W_A	6051.92	1.15074	0.168393	6.83368	8.27612e-12	2.50874e-11	enriched	DEF1	Dal81-independent	Stp2-dependent
C5_02910C_A	355.04	1.15216	0.173864	6.62681	3.4301e-11	1.00281e-10	enriched	GYP8	Dal81-independent	Stp2-independent
C1_10640C_A	1031.16	1.15236	0.149329	7.71692	1.19172e-14	4.20217e-14	enriched	PEA2	Dal81-independent	Stp2-independent
C2_01200C_A	3168.15	1.15254	0.13501	8.53664	1.38184e-17	5.60672e-17	enriched	REG1	Dal81-independent	Stp2-independent
C2_01820C_A	288.838	1.1543	0.171841	6.71728	1.85149e-11	5.50406e-11	enriched	CAWG_03950	Dal81-independent	Stp2-independent
C2_04830W_A	252.674	1.15434	0.231033	4.9964	5.84094e-07	1.29046e-06	enriched	CAWG_04240	Dal81-independent	Stp2-dependent
C5_05120W_A	2169.72	1.15655	0.131127	8.82001	1.14449e-18	4.93369e-18	enriched	CCT3	Dal81-independent	Stp2-independent
CR_07840C_A	355.904	1.15691	0.240073	4.81898	1.44296e-06	3.06833e-06	enriched	CAWG_02079	Dal81-independent	Stp2-independent
C7_01420W_A	767.702	1.15756	0.146864	7.88184	3.22596e-15	1.17619e-14	enriched	GIR2	Dal81-dependent	Stp2-independent
C5_00150C_A	3559.61	1.15877	0.134276	8.62976	6.14801e-18	2.53563e-17	enriched	CAWG_04410	Dal81-independent	Stp2-independent
C1_05880W_A	343.476	1.15928	0.164954	7.0279	2.09668e-12	6.54735e-12	enriched	PRN4	Dal81-dependent	Stp2-dependent
C2_01370C_A	1037.99	1.15955	0.150854	7.68657	1.51137e-14	5.29202e-14	enriched	CAWG_03910	Dal81-independent	Stp2-independent
C1_13430C_A	202.317	1.16142	0.289905	4.00622	6.16973e-05	0.000113683	enriched	CAWG_00108	Dal81-independent	Stp2-independent
C3_02190C_A	722.372	1.16144	0.132466	8.76783	1.82138e-18	7.74052e-18	enriched	CAWG_02546	Dal81-independent	Stp2-independent
C7_03110W_A	24.6425	1.16148	0.523068	2.22051	0.0263843	0.0362392	enriched	PGA28	Dal81-independent	Stp2-independent
C1_13400C_A	1975.22	1.16178	0.138702	8.37611	5.47058e-17	2.16409e-16	enriched	AGC1	Dal81-independent	Stp2-independent
C2_08510W_A	71.5761	1.16477	0.3113	3.74163	0.000182829	0.000323574	enriched	CAWG_05936	Dal81-independent	Stp2-independent
C7_00780W_A	915.848	1.16503	0.135381	8.60555	7.59534e-18	3.11544e-17	enriched	CAWG_05434	Dal81-dependent	Stp2-independent
C5_03790W_A	759.742	1.16554	0.175827	6.62892	3.38146e-11	9.89554e-11	enriched	GUK1	Dal81-dependent	Stp2-dependent
C3_01680C_A	487.961	1.16591	0.176143	6.61909	3.61409e-11	1.05301e-10	enriched	CAWG_02499	Dal81-independent	Stp2-independent
C2_04060C_A	442.155	1.16656	0.179744	6.49013	8.5762e-11	2.45005e-10	enriched	SSY1	Dal81-independent	Stp2-independent
C7_00350C_A	1662.89	1.1675	0.191131	6.10837	1.00653e-09	2.6923e-09	enriched	CAWG_05392	Dal81-dependent	Stp2-dependent
C1_10000C_A	884.98	1.16798	0.128485	9.09043	9.86513e-20	4.43414e-19	enriched	CPP1	Dal81-independent	Stp2-independent
C2_05490W_A	100.176	1.16827	0.267181	4.37258	1.22785e-05	2.42861e-05	enriched	CAWG_04297	Dal81-independent	Stp2-dependent
C3_06050C_A	463.891	1.16834	0.208859	5.59392	2.21996e-08	5.44117e-08	enriched	CAWG_02914	Dal81-independent	Stp2-independent
C4_05440C_A	775.043	1.16842	0.151615	7.70653	1.29289e-14	4.55088e-14	enriched	CAWG_03272	Dal81-dependent	Stp2-dependent
C7_02160W_A	520.092	1.17099	0.185175	6.32373	2.55329e-10	7.1314e-10	enriched	CAWG_05566	Dal81-dependent	Stp2-dependent
C2_03070C_A	176.337	1.17214	0.211219	5.54941	2.86641e-08	6.94625e-08	enriched	SMP3	Dal81-dependent	Stp2-independent
C7_03340C_A	100.646	1.17565	0.29872	3.93563	8.29778e-05	0.000151499	enriched	PRR2	Dal81-dependent	Stp2-dependent
C3_03980C_A	158.997	1.17648	0.225489	5.21746	1.81396e-07	4.15599e-07	enriched	CAWG_02713	Dal81-dependent	Stp2-dependent
C4_01820C_A	1047.35	1.17841	0.151814	7.76219	8.34771e-15	2.97319e-14	enriched	CAWG_03613	Dal81-independent	Stp2-independent
C1_04380W_A	714.869	1.17844	0.142831	8.25062	1.5758e-16	6.101e-16	enriched	SIT4	Dal81-independent	Stp2-independent
C2_09900C_A	1149.96	1.17938	0.149005	7.91505	2.47161e-15	9.05003e-15	enriched	TIM23	Dal81-independent	Stp2-independent
C7_04180W_A	403.155	1.17975	0.22465	5.2515	1.50862e-07	3.48567e-07	enriched	FAA2-3	Dal81-dependent	Stp2-dependent
CR_03440W_A	60.4433	1.18031	0.389062	3.03374	0.00241544	0.00378812	enriched	CAWG_01679	Dal81-independent	Stp2-dependent
CR_05640C_A	355.233	1.18172	0.178747	6.61112	3.81414e-11	1.10861e-10	enriched	CAWG_01885	Dal81-independent	Stp2-independent
C3_00050C_A	87.5283	1.18179	0.346386	3.41177	0.000645423	0.00107541	enriched	orf19.5468	Dal81-dependent	Stp2-dependent
C5_02040W_A	918.278	1.1834	0.129389	9.1461	5.90273e-20	2.67921e-19	enriched	CAWG_04589	Dal81-independent	Stp2-independent
C5_00180W_A	3742.31	1.18643	0.145524	8.15279	3.55635e-16	1.35421e-15	enriched	AFL1	Dal81-independent	Stp2-independent
C5_03030W_A	84.4394	1.18742	0.316464	3.75215	0.000175321	0.000311205	enriched	CAWG_04684	Dal81-independent	Stp2-independent
C4_03710C_A	254.782	1.18804	0.250236	4.74765	2.0579e-06	4.32086e-06	enriched	CAWG_03442	Dal81-dependent	Stp2-dependent
C5_02890W_A	3338.74	1.18807	0.131462	9.03734	1.60536e-19	7.17275e-19	enriched	YNK1	Dal81-independent	Stp2-independent
C4_02390W_A	27541.8	1.18834	0.139906	8.49388	1.99855e-17	8.05998e-17	enriched	PGA62	Dal81-independent	Stp2-dependent
CR_00310C_A	1706.38	1.18933	0.162506	7.3187	2.50376e-13	8.27011e-13	enriched	CAWG_01392	Dal81-independent	Stp2-independent
C1_11670W_A	2238.27	1.19149	0.137774	8.64813	5.23515e-18	2.16957e-17	enriched	CAWG_00270	Dal81-dependent	Stp2-dependent
C6_02970C_A	247.143	1.19409	0.199312	5.99107	2.08463e-09	5.46646e-09	enriched	CAWG_05092	Dal81-independent	Stp2-independent
C2_04730W_A	413.603	1.19445	0.148795	8.02753	9.94573e-16	3.70497e-15	enriched	CAWG_04229	Dal81-independent	Stp2-independent
C5_04290C_A	2425.64	1.19467	0.122289	9.76925	1.52574e-22	7.70569e-22	enriched	CAWG_04802	Dal81-dependent	Stp2-dependent
C5_02340C_A	976.726	1.19553	0.129174	9.25518	2.13862e-20	9.93227e-20	enriched	CST20	Dal81-independent	Stp2-independent
C7_01280C_A	310.266	1.19683	0.18838	6.35327	2.10785e-10	5.91477e-10	enriched	CAWG_05479	Dal81-independent	Stp2-independent
C4_03150W_A	727.363	1.20017	0.147354	8.14484	3.79789e-16	1.44161e-15	enriched	CAWG_03485	Dal81-dependent	Stp2-dependent
C5_03690W_A	195.59	1.20105	0.198089	6.0632	1.3344e-09	3.54404e-09	enriched	CAWG_04741	Dal81-independent	Stp2-dependent
C2_02550C_A	43.5624	1.20306	0.413663	2.9083	0.00363395	0.00558962	enriched	CAWG_04023	Dal81-dependent	Stp2-dependent
C3_01580W_A	81.8768	1.20521	0.341554	3.5286	0.000417761	0.000711473	enriched	ZCF7	Dal81-independent	Stp2-dependent
C5_01730W_A	273.486	1.20689	0.195668	6.16804	6.91434e-10	1.87114e-09	enriched	CAWG_04558	Dal81-dependent	Stp2-independent
C2_07540W_A	777.362	1.20744	0.18457	6.54192	6.0735e-11	1.74755e-10	enriched	CAWG_05850	Dal81-independent	Stp2-independent
C2_08055W_A	161.803	1.20789	0.300559	4.0188	5.8495e-05	0.000107981	enriched	RPR1	Dal81-independent	Stp2-independent
C7_00290C_A	62.8793	1.20842	0.349041	3.46211	0.000535964	0.000899992	enriched	HGT13	Dal81-dependent	Stp2-dependent
C4_05160C_A	235.886	1.20888	0.228985	5.2793	1.29677e-07	3.01359e-07	enriched	CAWG_03299	Dal81-independent	Stp2-independent
C1_06000W_A	54.7323	1.20953	0.346684	3.48885	0.000485107	0.000820351	enriched	CAWG_00807	Dal81-dependent	Stp2-dependent
C5_02620C_A	696.181	1.21464	0.151996	7.99125	1.33576e-15	4.95137e-15	enriched	CAWG_04644	Dal81-independent	Stp2-dependent
C4_00670W_A	703.411	1.21518	0.174145	6.97795	2.9952e-12	9.25692e-12	enriched	TOK1	Dal81-dependent	Stp2-dependent
C2_02580W_A	798.687	1.21542	0.13973	8.69831	3.3687e-18	1.40871e-17	enriched	CAWG_04026	Dal81-independent	Stp2-independent
C3_07250W_A	1448.51	1.21675	0.142731	8.52481	1.53056e-17	6.1934e-17	enriched	GCD2	Dal81-independent	Stp2-independent
C2_05970C_A	142.333	1.21779	0.219705	5.54286	2.97564e-08	7.19933e-08	enriched	TES1	Dal81-independent	Stp2-independent
C1_12820C_A	750.854	1.22165	0.157245	7.76905	7.90766e-15	2.82148e-14	enriched	CAWG_00160	Dal81-dependent	Stp2-dependent
C1_09180W_A	318.536	1.22203	0.178238	6.8562	7.0714e-12	2.15224e-11	enriched	LYS143	Dal81-independent	Stp2-independent
C3_00640W_A	1480.84	1.22444	0.182153	6.72208	1.79151e-11	5.3284e-11	enriched	CAWG_02400	Dal81-independent	Stp2-independent
CR_05260C_A	462.379	1.22465	0.153509	7.97773	1.49044e-15	5.51113e-15	enriched	KCS1	Dal81-dependent	Stp2-dependent
CR_05650W_A	935.777	1.22477	0.132332	9.25531	2.13605e-20	9.92802e-20	enriched	BRF1	Dal81-independent	Stp2-independent
CR_06330C_A	368.103	1.22668	0.162955	7.52773	5.16311e-14	1.76362e-13	enriched	CAWG_01942	Dal81-dependent	Stp2-dependent
C5_01400W_A	116.959	1.22687	0.271014	4.52697	5.98343e-06	1.21182e-05	enriched	SEF2	Dal81-dependent	Stp2-independent
C7_03610C_A	828.472	1.2286	0.146433	8.39018	4.85414e-17	1.92403e-16	enriched	CAWG_05692	Dal81-independent	Stp2-independent
C4_01490W_A	3111.47	1.2286	0.157164	7.81733	5.39539e-15	1.94122e-14	enriched	NIP1	Dal81-independent	Stp2-independent
CR_01550C_A	254.366	1.23056	0.18447	6.67077	2.54458e-11	7.505e-11	enriched	CAWG_01505	Dal81-dependent	Stp2-dependent
C5_04440C_A	306.842	1.23077	0.16655	7.3898	1.47054e-13	4.90589e-13	enriched	SFC1	Dal81-dependent	Stp2-dependent
C2_08760C_A	4584.98	1.23136	0.161427	7.62801	2.38408e-14	8.26582e-14	enriched	TIF4631	Dal81-independent	Stp2-independent
C7_01400C_A	386.078	1.23507	0.221408	5.57828	2.42904e-08	5.92942e-08	enriched	CAWG_05491	Dal81-dependent	Stp2-independent
C1_12800W_A	56.4242	1.23754	0.344643	3.5908	0.000329668	0.000567725	enriched	CAWG_00162	Dal81-dependent	Stp2-dependent
C2_00940W_A	887.882	1.23784	0.18058	6.85481	7.1406e-12	2.1722e-11	enriched	CAWG_03873	Dal81-independent	Stp2-independent
C5_03110C_A	297.179	1.23891	0.169491	7.30959	2.67963e-13	8.83644e-13	enriched	CAWG_04692	Dal81-dependent	Stp2-dependent
C3_02670W_A	162.314	1.23912	0.221089	5.60463	2.08697e-08	5.12986e-08	enriched	CAWG_02590	Dal81-dependent	Stp2-dependent
C5_03470C_A	913.176	1.24353	0.143081	8.69105	3.59112e-18	1.49963e-17	enriched	CAWG_04720	Dal81-dependent	Stp2-dependent
C5_03150W_A	1451.48	1.24421	0.16086	7.73475	1.03604e-14	3.6683e-14	enriched	CAWG_04696	Dal81-independent	Stp2-independent
C1_01150C_A	769.076	1.24489	0.165145	7.53819	4.76525e-14	1.63236e-13	enriched	CAWG_01260	Dal81-dependent	Stp2-dependent
C4_06430C_A	246.032	1.24514	0.200522	6.20949	5.31561e-10	1.45356e-09	enriched	CAWG_03184	Dal81-independent	Stp2-independent
C5_02790C_A	474.212	1.24544	0.145328	8.56987	1.03605e-17	4.23519e-17	enriched	GAP1	Dal81-independent	Stp2-dependent
C1_03320C_A	357.153	1.24573	0.197611	6.30395	2.9016e-10	8.07044e-10	enriched	EHD3	Dal81-dependent	Stp2-dependent
C2_07090C_A	798.336	1.24688	0.135995	9.16856	4.79363e-20	2.19069e-19	enriched	OLE2	Dal81-dependent	Stp2-dependent
CR_04200W_A	3496.44	1.24713	0.156377	7.97515	1.52191e-15	5.62405e-15	enriched	YDJ1	Dal81-independent	Stp2-independent
C6_00690W_A	333.188	1.24719	0.180926	6.89335	5.44936e-12	1.66447e-11	enriched	CAWG_05290	Dal81-independent	Stp2-dependent
C2_06830C_A	1008.48	1.24767	0.127157	9.81201	9.99576e-23	5.09546e-22	enriched	FHL1	Dal81-dependent	Stp2-dependent
C4_02090C_A	388.454	1.24774	0.169795	7.34851	2.00428e-13	6.64587e-13	enriched	CAWG_03585	Dal81-dependent	Stp2-dependent
C5_03740W_A	554.203	1.24978	0.155756	8.02395	1.02397e-15	3.8121e-15	enriched	CAWG_04746	Dal81-dependent	Stp2-dependent
C1_11570W_A	53.2613	1.25077	0.348881	3.58509	0.000336963	0.000579622	enriched	CAWG_00280	Dal81-independent	Stp2-dependent
C3_01420C_A	333.954	1.25324	0.184407	6.79606	1.07522e-11	3.23645e-11	enriched	CAWG_02474	Dal81-dependent	Stp2-independent
CR_03350C_A	732.935	1.25464	0.153703	8.16277	3.27436e-16	1.24841e-15	enriched	CAWG_01670	Dal81-independent	Stp2-independent
C7_01620C_A	469.73	1.25606	0.145988	8.60385	7.70836e-18	3.15748e-17	enriched	KCH1	Dal81-dependent	Stp2-independent
C1_08110W_A	2295.2	1.25771	0.158339	7.94316	1.97101e-15	7.24795e-15	enriched	CAWG_00612	Dal81-independent	Stp2-independent
C1_03820W_A	607.231	1.25845	0.186608	6.74381	1.54291e-11	4.60724e-11	enriched	PDR16	Dal81-independent	Stp2-dependent
C4_00240C_A	1437.88	1.26058	0.137193	9.18837	3.98835e-20	1.83525e-19	enriched	PRO3	Dal81-dependent	Stp2-dependent
C7_02940C_A	861.148	1.26059	0.137667	9.15677	5.34732e-20	2.43447e-19	enriched	IFM1	Dal81-independent	Stp2-independent
C2_09310C_A	284.028	1.26124	0.184732	6.82741	8.64625e-12	2.61829e-11	enriched	CAWG_06008	Dal81-dependent	Stp2-dependent
C4_03730C_A	471.951	1.26233	0.210285	6.00295	1.93761e-09	5.09651e-09	enriched	CAWG_03440	Dal81-dependent	Stp2-dependent
C2_09920W_A	159.546	1.26277	0.227084	5.56083	2.68502e-08	6.51984e-08	enriched	CAWG_06064	Dal81-dependent	Stp2-dependent
C6_03380W_A	2253.74	1.26356	0.15135	8.34858	6.90901e-17	2.72056e-16	enriched	CAWG_05032	Dal81-dependent	Stp2-dependent
C7_01270C_A	784.846	1.26356	0.13823	9.14101	6.18725e-20	2.80622e-19	enriched	CAWG_05478	Dal81-dependent	Stp2-dependent
C2_06300W_A	205.549	1.26418	0.198017	6.38422	1.72275e-10	4.84322e-10	enriched	CAWG_04374	Dal81-independent	Stp2-independent
C4_03680C_A	182.674	1.26596	0.200475	6.31477	2.7056e-10	7.53926e-10	enriched	CAWG_03445	Dal81-independent	Stp2-independent
CR_10260W_A	260.24	1.26804	0.187283	6.77074	1.28122e-11	3.84302e-11	enriched	CAWG_02285	Dal81-dependent	Stp2-dependent
CR_00540C_A	1252.99	1.26855	0.126774	10.0064	1.42924e-23	7.48264e-23	enriched	MDH1	Dal81-dependent	Stp2-dependent
C3_03670W_A	986.28	1.2715	0.126712	10.0346	1.07436e-23	5.66918e-23	enriched	CAWG_02684	Dal81-independent	Stp2-independent
C2_07000W_A	541.73	1.27339	0.182679	6.97066	3.1545e-12	9.72922e-12	enriched	CAWG_05798	Dal81-dependent	Stp2-dependent
C6_01260W_A	78.9592	1.27378	0.344655	3.69581	0.000219187	0.000384298	enriched	orf19.134	Dal81-dependent	Stp2-independent
C1_09240C_A	91.7221	1.27433	0.271723	4.68982	2.7344e-06	5.6935e-06	enriched	CAWG_00505	Dal81-dependent	Stp2-dependent
C7_00950W_A	878.318	1.27467	0.150657	8.46075	2.65657e-17	1.06707e-16	enriched	YML6	Dal81-independent	Stp2-independent
C3_04890W_A	270.96	1.27548	0.182275	6.99756	2.60466e-12	8.0832e-12	enriched	CDR2	Dal81-independent	Stp2-independent
CR_05900W_A	215.412	1.27755	0.212797	6.0036	1.9299e-09	5.07847e-09	enriched	CAWG_01907	Dal81-independent	Stp2-independent
C3_03330C_A	596.538	1.27814	0.142833	8.94849	3.60378e-19	1.58889e-18	enriched	CAWG_02661	Dal81-dependent	Stp2-dependent
C5_02660C_A	2222.93	1.27957	0.139505	9.1722	4.63466e-20	2.11966e-19	enriched	CAWG_04649	Dal81-independent	Stp2-independent
C1_06100C_A	5076.74	1.28022	0.152946	8.37038	5.74337e-17	2.2705e-16	enriched	MSI3	Dal81-dependent	Stp2-dependent
C7_02220C_A	251.753	1.28238	0.192033	6.67791	2.42379e-11	7.1593e-11	enriched	CAWG_05571	Dal81-independent	Stp2-dependent
C5_00900C_A	1108.39	1.28303	0.149099	8.60518	7.61941e-18	3.12318e-17	enriched	URA4	Dal81-independent	Stp2-independent
C5_02540C_A	158.016	1.28458	0.251394	5.10983	3.22453e-07	7.25761e-07	enriched	SPR28	Dal81-dependent	Stp2-dependent
C7_01450C_A	4676.24	1.28538	0.137351	9.35832	8.10114e-21	3.83654e-20	enriched	PRT1	Dal81-dependent	Stp2-independent
CR_09030C_A	59.4301	1.28783	0.314658	4.09281	4.26173e-05	7.98244e-05	enriched	CAWG_02179	Dal81-dependent	Stp2-dependent
C3_07790W_A	720.231	1.29194	0.164222	7.86702	3.63185e-15	1.31776e-14	enriched	STD1	Dal81-independent	Stp2-independent
C1_06770W_A	615.124	1.29212	0.172427	7.49373	6.69409e-14	2.27364e-13	enriched	CAWG_00736	Dal81-independent	Stp2-dependent
C3_05860C_A	469.031	1.29756	0.160669	8.07599	6.69287e-16	2.51349e-15	enriched	CAWG_02895	Dal81-dependent	Stp2-dependent
C4_04260C_A	1327.88	1.29876	0.133429	9.73371	2.16553e-22	1.0882e-21	enriched	FZO1	Dal81-independent	Stp2-independent
CR_06230W_A	757.58	1.2996	0.138594	9.37705	6.78456e-21	3.23087e-20	enriched	CAWG_01934	Dal81-dependent	Stp2-dependent
CR_02700W_A	219.047	1.3004	0.199221	6.52741	6.69156e-11	1.92262e-10	enriched	CAWG_01609	Dal81-dependent	Stp2-independent
C2_01210C_A	1536.69	1.30078	0.196287	6.62692	3.42757e-11	1.00256e-10	enriched	HNM1	Dal81-independent	Stp2-independent
CR_04710W_A	119.683	1.30138	0.302026	4.30884	1.64113e-05	3.21533e-05	enriched	CAWG_01804	Dal81-dependent	Stp2-dependent
C3_02370C_A	5095.81	1.3048	0.147648	8.83726	9.80937e-19	4.24084e-18	enriched	ALR1	Dal81-dependent	Stp2-dependent
C7_03500W_A	528.97	1.30496	0.17164	7.60287	2.89637e-14	9.99517e-14	enriched	CAWG_05682	Dal81-dependent	Stp2-independent
C2_04820W_A	620.741	1.30509	0.151111	8.63663	5.78957e-18	2.39109e-17	enriched	CAWG_04239	Dal81-dependent	Stp2-dependent
C5_00210C_A	2637.17	1.30585	0.123787	10.5492	5.12343e-26	2.92177e-25	enriched	BRE1	Dal81-dependent	Stp2-dependent
C7_03030W_A	845.261	1.30886	0.140701	9.30248	1.37211e-20	6.43212e-20	enriched	CAWG_05637	Dal81-independent	Stp2-independent
C2_03690C_A	498.66	1.30986	0.210324	6.22781	4.72992e-10	1.30111e-09	enriched	MNN42	Dal81-dependent	Stp2-dependent
C6_02390W_A	44.6673	1.31038	0.406776	3.22137	0.0012758	0.00205614	enriched	snR58	Dal81-dependent	Stp2-dependent
C1_10450W_A	7022.49	1.31121	0.182846	7.17114	7.43746e-13	2.38324e-12	enriched	GLY1	Dal81-independent	Stp2-dependent
C4_01720C_A	2042.09	1.31232	0.152387	8.61176	7.19498e-18	2.95526e-17	enriched	CAWG_03622	Dal81-independent	Stp2-independent
C2_04510W_A	717.036	1.31414	0.135059	9.73018	2.24193e-22	1.12471e-21	enriched	RIM2	Dal81-dependent	Stp2-dependent
C3_01410C_A	917.484	1.31486	0.185152	7.10153	1.23386e-12	3.91201e-12	enriched	ALI1	Dal81-dependent	Stp2-independent
C1_05510C_A	835.53	1.31527	0.130867	10.0504	9.14772e-24	4.85694e-23	enriched	RPS27A	Dal81-independent	Stp2-independent
C7_02200W_A	561.786	1.31548	0.174804	7.5255	5.25191e-14	1.79293e-13	enriched	WHI3	Dal81-independent	Stp2-independent
C3_06540C_A	141.015	1.31796	0.24608	5.35582	8.51696e-08	2.00409e-07	enriched	CAWG_02964	Dal81-independent	Stp2-independent
C5_05000C_A	1058.35	1.31863	0.126027	10.4631	1.27668e-25	7.2257e-25	enriched	CAWG_04866	Dal81-dependent	Stp2-dependent
C3_06420C_A	1406.8	1.32048	0.124805	10.5803	3.67655e-26	2.11068e-25	enriched	CAWG_02953	Dal81-dependent	Stp2-dependent
C5_02630C_A	1340.56	1.32101	0.212397	6.21957	4.98524e-10	1.36821e-09	enriched	MNN1	Dal81-dependent	Stp2-dependent
C5_03500W_A	3050.93	1.32226	0.200273	6.6023	4.0482e-11	1.17607e-10	enriched	GAP6	Dal81-dependent	Stp2-dependent
C3_02790W_A	120.742	1.32396	0.285715	4.63385	3.58932e-06	7.41192e-06	enriched	CAWG_02599	Dal81-dependent	Stp2-independent
CR_08340W_A	12412.2	1.32411	0.127869	10.3552	3.9632e-25	2.2117e-24	enriched	CYS3	Dal81-dependent	Stp2-independent
C2_06480W_A	462.235	1.32415	0.194323	6.8142	9.47913e-12	2.86185e-11	enriched	CAWG_04388	Dal81-dependent	Stp2-dependent
CR_00740C_A	460.266	1.32476	0.154827	8.55639	1.16456e-17	4.74758e-17	enriched	BMT3	Dal81-independent	Stp2-independent
C3_00660W_A	513.097	1.32569	0.159152	8.32976	8.10091e-17	3.18572e-16	enriched	CAWG_02402	Dal81-dependent	Stp2-dependent
C1_06440C_A	780.357	1.32585	0.138684	9.56023	1.175e-21	5.75991e-21	enriched	CAWG_00767	Dal81-dependent	Stp2-independent
C3_07760C_A	301.472	1.32681	0.194595	6.81832	9.21088e-12	2.78366e-11	enriched	CAWG_03082	Dal81-independent	Stp2-independent
C4_01600C_A	22.1101	1.33367	0.584972	2.27989	0.022614	0.0313546	enriched	snR75	Dal81-dependent	Stp2-dependent
CR_04270C_A	72.398	1.33414	0.302573	4.4093	1.03704e-05	2.06138e-05	enriched	CAWG_01764	Dal81-dependent	Stp2-dependent
C2_07300C_A	314.064	1.33563	0.232145	5.75344	8.74442e-09	2.198e-08	enriched	RPA12	Dal81-dependent	Stp2-dependent
C6_03830W_A	1287.13	1.33615	0.137967	9.68452	3.50859e-22	1.75138e-21	enriched	SAL6	Dal81-independent	Stp2-independent
C3_07600W_A	446.886	1.33654	0.180314	7.4123	1.24128e-13	4.15722e-13	enriched	CAWG_03066	Dal81-dependent	Stp2-dependent
C2_02600C_A	76.3308	1.33712	0.320355	4.17386	2.99478e-05	5.70346e-05	enriched	FGR22	Dal81-dependent	Stp2-dependent
C2_01660C_A	639.508	1.33757	0.155032	8.62767	6.26144e-18	2.58064e-17	enriched	CAWG_03938	Dal81-independent	Stp2-independent
C1_06510C_A	841.652	1.3386	0.148195	9.03269	1.67503e-19	7.47292e-19	enriched	CAWG_00761	Dal81-independent	Stp2-independent
C6_00480C_A	676.91	1.33947	0.175707	7.62331	2.47256e-14	8.56762e-14	enriched	FET31	Dal81-dependent	Stp2-dependent
C3_03470W_A	147.65	1.34018	0.242954	5.51616	3.46485e-08	8.35599e-08	enriched	CAWG_02649	Dal81-dependent	Stp2-dependent
C2_09610W_A	358.666	1.34043	0.167674	7.99428	1.30333e-15	4.83416e-15	enriched	CAWG_06034	Dal81-independent	Stp2-independent
C1_11080W_A	5602.66	1.34384	0.133108	10.0959	5.76252e-24	3.0924e-23	enriched	CAWG_00326	Dal81-dependent	Stp2-dependent
C4_00250W_A	1577.25	1.34499	0.136765	9.83431	8.01141e-23	4.10833e-22	enriched	CAWG_03759	Dal81-independent	Stp2-independent
C4_03140C_A	513.243	1.34905	0.184886	7.29668	2.9495e-13	9.68913e-13	enriched	CAWG_03486	Dal81-dependent	Stp2-dependent
CR_05730C_A	640.961	1.35052	0.166878	8.09283	5.8292e-16	2.19372e-15	enriched	CAWG_01894	Dal81-independent	Stp2-independent
C5_01270W_A	411.679	1.35086	0.180881	7.46825	8.12687e-14	2.7494e-13	enriched	SGE1	Dal81-independent	Stp2-independent
C1_07130C_A	738.734	1.35237	0.143151	9.44717	3.48108e-21	1.67903e-20	enriched	CAWG_00702	Dal81-independent	Stp2-independent
C7_00770W_A	419.95	1.35272	0.25148	5.37904	7.48825e-08	1.77035e-07	enriched	CAWG_05433	Dal81-dependent	Stp2-dependent
C4_03040W_A	762.839	1.35333	0.13425	10.0807	6.72311e-24	3.59504e-23	enriched	CAWG_03495	Dal81-independent	Stp2-independent
C4_00480W_A	324.17	1.35359	0.187905	7.20362	5.86328e-13	1.89499e-12	enriched	DUR4	Dal81-dependent	Stp2-dependent
C2_10110W_A	1060.96	1.35368	0.231811	5.83958	5.23314e-09	1.33837e-08	enriched	CYC1	Dal81-independent	Stp2-dependent
C6_03810W_A	245.932	1.35407	0.196732	6.88282	5.86792e-12	1.78867e-11	enriched	CAWG_04992	Dal81-independent	Stp2-independent
C5_04100W_A	1234.77	1.35429	0.144292	9.38574	6.24743e-21	2.98218e-20	enriched	CDS1	Dal81-independent	Stp2-independent
C3_04260W_A	649.265	1.35843	0.142495	9.53319	1.52529e-21	7.44059e-21	enriched	CAWG_02739	Dal81-independent	Stp2-independent
C5_00860W_A	261.189	1.36191	0.177611	7.66794	1.74779e-14	6.09847e-14	enriched	IMP2	Dal81-independent	Stp2-independent
CR_05180C_A	1056.15	1.36379	0.163983	8.31669	9.04563e-17	3.54794e-16	enriched	SDH2	Dal81-dependent	Stp2-dependent
C3_01140W_A	127.418	1.36431	0.230177	5.92722	3.08106e-09	7.99557e-09	enriched	CAWG_02448	Dal81-independent	Stp2-independent
C2_08840W_A	592.177	1.36666	0.179432	7.61658	2.60484e-14	9.0156e-14	enriched	CAWG_05967	Dal81-dependent	Stp2-dependent
C3_04860W_A	1994.24	1.36666	0.127142	10.7491	5.98357e-27	3.51235e-26	enriched	SFP1	Dal81-dependent	Stp2-dependent
C6_02430W_A	1066.46	1.36755	0.160298	8.53129	1.44729e-17	5.86038e-17	enriched	CAWG_05125	Dal81-dependent	Stp2-dependent
C1_01170C_A	562.679	1.37077	0.178955	7.65989	1.86095e-14	6.48202e-14	enriched	ZCF17	Dal81-dependent	Stp2-dependent
CR_01300W_A	459.817	1.37111	0.177961	7.70458	1.31279e-14	4.61823e-14	enriched	orf19.3223.1	Dal81-independent	Stp2-independent
C4_03750C_A	250.015	1.37356	0.259831	5.28636	1.24776e-07	2.90757e-07	enriched	CAWG_03438	Dal81-independent	Stp2-independent
C4_00830W_A	536.436	1.37694	0.158196	8.704	3.20397e-18	1.34169e-17	enriched	SPS20	Dal81-independent	Stp2-independent
C6_02370C_A	1130.76	1.37896	0.146107	9.43802	3.79878e-21	1.82786e-20	enriched	CAWG_05129	Dal81-independent	Stp2-independent
C4_06420W_A	918.879	1.37929	0.155326	8.88002	6.68513e-19	2.9069e-18	enriched	CAWG_03185	Dal81-independent	Stp2-independent
C4_02050W_A	780.644	1.3809	0.192123	7.18757	6.59553e-13	2.12479e-12	enriched	HGH1	Dal81-dependent	Stp2-dependent
C2_10730W_A	317.205	1.38125	0.231813	5.95847	2.54618e-09	6.64197e-09	enriched	CAWG_06134	Dal81-dependent	Stp2-dependent
C1_11380W_A	972.206	1.38205	0.139006	9.94238	2.72245e-23	1.41789e-22	enriched	NEP1	Dal81-dependent	Stp2-dependent
CR_01950W_A	1060.29	1.38236	0.178825	7.73028	1.07307e-14	3.79492e-14	enriched	CAWG_01543	Dal81-dependent	Stp2-dependent
C2_01700C_A	195.586	1.38534	0.268462	5.16028	2.46576e-07	5.59807e-07	enriched	HAP42	Dal81-dependent	Stp2-dependent
C5_03640W_A	126.699	1.38737	0.330416	4.19886	2.68267e-05	5.14185e-05	enriched	CAWG_04737	Dal81-dependent	Stp2-dependent
C5_03620W_A	498.891	1.38743	0.16519	8.39898	4.50379e-17	1.78989e-16	enriched	BTS1	Dal81-independent	Stp2-independent
C1_11550W_A	2867.65	1.38843	0.151314	9.17581	4.48197e-20	2.05139e-19	enriched	GAR1	Dal81-dependent	Stp2-dependent
C6_01590W_A	1327.91	1.3895	0.140022	9.92341	3.29323e-23	1.71072e-22	enriched	CAWG_05208	Dal81-independent	Stp2-independent
C2_05580W_A	1082.64	1.39014	0.143991	9.65436	4.71101e-22	2.3438e-21	enriched	CAWG_04306	Dal81-independent	Stp2-independent
C2_08600W_A	253.267	1.3921	0.208288	6.68354	2.33241e-11	6.89955e-11	enriched	GTR1	Dal81-independent	Stp2-independent
C2_04200W_A	1107.98	1.39597	0.133764	10.4361	1.69649e-25	9.55669e-25	enriched	TBF1	Dal81-dependent	Stp2-dependent
C7_03630C_A	578.721	1.39727	0.16025	8.71935	2.79793e-18	1.17576e-17	enriched	TIM9	Dal81-independent	Stp2-independent
C1_04120C_A	407.042	1.39768	0.152053	9.19207	3.85365e-20	1.77463e-19	enriched	CAWG_00981	Dal81-dependent	Stp2-dependent
C4_00740W_A	210.636	1.39878	0.205032	6.82226	8.96176e-12	2.71247e-11	enriched	CAWG_03707	Dal81-dependent	Stp2-dependent
CR_00330C_A	327.662	1.39934	0.178624	7.83403	4.72469e-15	1.70401e-14	enriched	PXA1	Dal81-dependent	Stp2-dependent
C2_04810W_A	239.969	1.40067	0.210343	6.65897	2.75749e-11	8.11702e-11	enriched	HIS3	Dal81-dependent	Stp2-dependent
C3_01310W_A	434.712	1.40074	0.191946	7.2976	2.92956e-13	9.62889e-13	enriched	CAWG_02464	Dal81-dependent	Stp2-dependent
C1_04720W_A	490.731	1.40195	0.160727	8.72251	2.72101e-18	1.14424e-17	enriched	orf19.772.1	Dal81-dependent	Stp2-dependent
C1_02420C_A	5887.38	1.40195	0.139719	10.0341	1.07978e-23	5.69278e-23	enriched	GSC1	Dal81-independent	Stp2-independent
C7_02540W_A	265.861	1.40528	0.210411	6.67873	2.41029e-11	7.12291e-11	enriched	CAWG_05598	Dal81-independent	Stp2-independent
C1_08960W_A	91.6188	1.40567	0.352916	3.98303	6.80422e-05	0.000124876	enriched	snR190	Dal81-dependent	Stp2-dependent
C2_06070W_A	354.083	1.40596	0.16699	8.41943	3.78331e-17	1.50955e-16	enriched	FAA2-1	Dal81-dependent	Stp2-dependent
C5_03080C_A	717.301	1.41195	0.182073	7.75482	8.84712e-15	3.1492e-14	enriched	CAWG_04689	Dal81-dependent	Stp2-dependent
C2_02310W_A	1011.55	1.41199	0.148125	9.53238	1.53712e-21	7.49221e-21	enriched	CAWG_03999	Dal81-independent	Stp2-independent
C4_04660C_A	819.735	1.41568	0.142978	9.90136	4.1064e-23	2.12944e-22	enriched	CAWG_03347	Dal81-dependent	Stp2-dependent
CR_08720W_A	83.4846	1.41755	0.34427	4.11755	3.82916e-05	7.21498e-05	enriched	orf19.6449	Dal81-dependent	Stp2-dependent
C6_02520W_A	406.645	1.41904	0.193998	7.31471	2.57946e-13	8.5108e-13	enriched	ISA1	Dal81-independent	Stp2-independent
C4_07040W_A	148.898	1.4192	0.281422	5.04297	4.58366e-07	1.01944e-06	enriched	CAWG_03124	Dal81-independent	Stp2-dependent
C3_06680C_A	151.296	1.41964	0.228936	6.20103	5.60948e-10	1.52766e-09	enriched	CAWG_02978	Dal81-independent	Stp2-independent
C5_01310W_A	177.243	1.42076	0.203328	6.98752	2.79793e-12	8.6606e-12	enriched	CAWG_04519	Dal81-dependent	Stp2-dependent
C5_01800C_A	1081.96	1.42169	0.171974	8.26691	1.37478e-16	5.33995e-16	enriched	HIP1	Dal81-independent	Stp2-independent
C5_00910C_A	73.6915	1.42241	0.308746	4.60707	4.08389e-06	8.40142e-06	enriched	TRX2	Dal81-dependent	Stp2-dependent
C5_05280C_A	352.044	1.42293	0.180849	7.86808	3.6013e-15	1.30827e-14	enriched	SDH4	Dal81-dependent	Stp2-dependent
C6_03480W_A	260.216	1.42302	0.263827	5.39374	6.90076e-08	1.63468e-07	enriched	YMX6	Dal81-independent	Stp2-independent
C1_06090C_A	795.033	1.42657	0.143213	9.96116	2.25407e-23	1.17702e-22	enriched	CAWG_00798	Dal81-independent	Stp2-independent
C2_06460W_A	571.317	1.42777	0.163503	8.73237	2.49382e-18	1.05164e-17	enriched	RTA3	Dal81-dependent	Stp2-dependent
C6_04310W_A	752.261	1.42895	0.15699	9.10218	8.85404e-20	3.98565e-19	enriched	PEX11	Dal81-dependent	Stp2-independent
C7_02350C_A	704.216	1.42943	0.131999	10.8291	2.50654e-27	1.49918e-26	enriched	CAWG_05584	Dal81-independent	Stp2-independent
C1_10550C_A	269.15	1.43344	0.198924	7.20596	5.76343e-13	1.86473e-12	enriched	GCA2	Dal81-independent	Stp2-independent
C4_04490C_A	17.4658	1.43574	0.64662	2.22038	0.026393	0.0362428	enriched	snR18	Dal81-dependent	Stp2-dependent
C1_05900W_A	724.699	1.43625	0.161778	8.87788	6.81481e-19	2.96114e-18	enriched	CAWG_00817	Dal81-dependent	Stp2-independent
C5_05360C_A	851.083	1.4372	0.163632	8.78316	1.58946e-18	6.7789e-18	enriched	CAWG_04902	Dal81-independent	Stp2-independent
C3_01160W_A	1509.55	1.43822	0.133255	10.793	3.71522e-27	2.20454e-26	enriched	MSS4	Dal81-independent	Stp2-independent
C5_02990W_A	122.295	1.4393	0.280583	5.12968	2.90238e-07	6.55217e-07	enriched	CAWG_04680	Dal81-independent	Stp2-independent
C1_00410C_A	768.398	1.4426	0.13917	10.3657	3.54978e-25	1.98477e-24	enriched	CAWG_01332	Dal81-dependent	Stp2-independent
C7_01990C_A	367.956	1.44356	0.165785	8.70743	3.10834e-18	1.30346e-17	enriched	CAWG_05549	Dal81-dependent	Stp2-independent
C1_05650W_A	317.275	1.44401	0.195113	7.40088	1.35285e-13	4.52582e-13	enriched	CAWG_00840	Dal81-dependent	Stp2-dependent
C7_01130C_A	25.7994	1.4454	0.493527	2.92873	0.00340354	0.00525406	enriched	orf19.6897	Dal81-independent	Stp2-independent
C5_04940W_A	45.0167	1.44829	0.357259	4.0539	5.03704e-05	9.35294e-05	enriched	CAWG_04860	Dal81-independent	Stp2-independent
C1_09910C_A	527.256	1.44891	0.154555	9.37469	6.93814e-21	3.29878e-20	enriched	CAWG_00441	Dal81-independent	Stp2-dependent
C5_04250W_A	47.495	1.44919	0.481459	3.01001	0.00261241	0.00408105	enriched	MRV8	Dal81-dependent	Stp2-dependent
C5_04830W_A	888.334	1.45139	0.234683	6.18447	6.23115e-10	1.69312e-09	enriched	SFL2	Dal81-independent	Stp2-independent
C3_07270C_A	25354.2	1.45315	0.121449	11.965	5.41689e-33	3.80005e-32	enriched	UBI4	Dal81-independent	Stp2-independent
C5_04600C_A	2676.08	1.45502	0.116201	12.5215	5.69136e-36	4.34264e-35	enriched	GRR1	Dal81-independent	Stp2-independent
C7_00850W_A	422.585	1.45927	0.202846	7.19397	6.29341e-13	2.03182e-12	enriched	CAWG_05442	Dal81-dependent	Stp2-dependent
C4_00690C_A	274.508	1.4593	0.17954	8.12799	4.3646e-16	1.65047e-15	enriched	CAWG_03734	Dal81-dependent	Stp2-dependent
CR_02720C_A	625.692	1.45935	0.158957	9.1808	4.27914e-20	1.96155e-19	enriched	RPC31	Dal81-dependent	Stp2-dependent
C3_05830W_A	2613.23	1.4634	0.13259	11.037	2.53274e-28	1.56312e-27	enriched	KRE6	Dal81-independent	Stp2-independent
C3_07840C_A	1135.13	1.46464	0.13739	10.6605	1.55802e-26	9.03953e-26	enriched	CAWG_03090	Dal81-independent	Stp2-independent
C6_01630W_A	3154.85	1.46556	0.16955	8.6438	5.43723e-18	2.24866e-17	enriched	TIF3	Dal81-independent	Stp2-dependent
C2_00400C_A	1020.16	1.46817	0.156433	9.38531	6.27344e-21	2.99222e-20	enriched	CAWG_03820	Dal81-independent	Stp2-independent
C3_02310W_A	1602.24	1.47052	0.129455	11.3594	6.66313e-30	4.30238e-29	enriched	MEP1	Dal81-dependent	Stp2-dependent
C1_04940C_A	51.0868	1.47116	0.39096	3.76294	0.000167931	0.000298792	enriched	CAWG_00903	Dal81-independent	Stp2-dependent
C2_10340W_A	262.25	1.47141	0.176367	8.34289	7.24958e-17	2.8528e-16	enriched	HEM4	Dal81-independent	Stp2-independent
C2_02120W_A	750.728	1.473	0.183914	8.0092	1.15453e-15	4.29284e-15	enriched	CAWG_03979	Dal81-dependent	Stp2-dependent
C1_10800C_A	690.089	1.47492	0.143233	10.2974	7.23994e-25	4.01069e-24	enriched	ALP1	Dal81-dependent	Stp2-dependent
C5_00350C_A	676.602	1.47502	0.139243	10.5931	3.20694e-26	1.84637e-25	enriched	CAWG_04430	Dal81-independent	Stp2-independent
C2_03130W_A	600.342	1.47622	0.144412	10.2223	1.57587e-24	8.64209e-24	enriched	CAWG_04080	Dal81-dependent	Stp2-dependent
C7_01490W_A	1582.16	1.47647	0.135161	10.9238	8.86906e-28	5.38511e-27	enriched	CAWG_05500	Dal81-dependent	Stp2-dependent
C1_00030C_A	115.194	1.48057	0.277541	5.33462	9.57461e-08	2.24943e-07	enriched	orf19.6113	Dal81-dependent	Stp2-dependent
CR_10160W_A	5077.31	1.48193	0.128603	11.5233	1.0068e-30	6.66572e-30	enriched	FAA4	Dal81-independent	Stp2-independent
C1_00390W_A	829.799	1.48475	0.141224	10.5134	7.49141e-26	4.256e-25	enriched	ENA2	Dal81-independent	Stp2-independent
C1_00560W_A	864.786	1.48569	0.166058	8.94683	3.65829e-19	1.61174e-18	enriched	CNS1	Dal81-dependent	Stp2-dependent
C1_13240W_A	1191.09	1.48599	0.13825	10.7486	6.018e-27	3.52911e-26	enriched	orf19.4951	Dal81-dependent	Stp2-dependent
C7_04200C_A	1296.31	1.48867	0.162023	9.18798	4.00279e-20	1.84049e-19	enriched	CAWG_05749	Dal81-dependent	Stp2-independent
C1_04850C_A	108.094	1.49214	0.251096	5.94251	2.80695e-09	7.3e-09	enriched	orf19.757.1	Dal81-independent	Stp2-independent
C7_00010C_A	778.891	1.49302	0.164723	9.06378	1.26002e-19	5.64237e-19	enriched	orf19.7125	Dal81-independent	Stp2-independent
C3_02420C_A	161.914	1.49365	0.249561	5.98512	2.16235e-09	5.66284e-09	enriched	CAWG_02566	Dal81-independent	Stp2-independent
C4_05430C_A	2236.09	1.4946	0.122862	12.1648	4.78378e-34	3.45687e-33	enriched	GAP5	Dal81-dependent	Stp2-dependent
C7_00550C_A	2601.96	1.4961	0.147953	10.112	4.8888e-24	2.6353e-23	enriched	GLN4	Dal81-dependent	Stp2-independent
C3_05070W_A	198.893	1.4968	0.283975	5.27091	1.3575e-07	3.14984e-07	enriched	CEM1	Dal81-independent	Stp2-independent
C4_06760W_A	7425.8	1.49894	0.134132	11.1751	5.40069e-29	3.42462e-28	enriched	GUT2	Dal81-independent	Stp2-independent
C2_08700C_A	476.275	1.50044	0.178717	8.39564	4.63366e-17	1.83785e-16	enriched	CAWG_05954	Dal81-independent	Stp2-independent
C5_01820W_A	2198.33	1.5034	0.149733	10.0405	1.01127e-23	5.34566e-23	enriched	STI1	Dal81-dependent	Stp2-dependent
C1_07500C_A	1338.45	1.50344	0.153807	9.77489	1.44314e-22	7.30079e-22	enriched	LHP1	Dal81-dependent	Stp2-dependent
C6_01430C_A	1561.01	1.50528	0.13928	10.8076	3.17e-27	1.88848e-26	enriched	FRP6	Dal81-independent	Stp2-dependent
C1_05940W_A	4621.33	1.50569	0.107635	13.9889	1.8215e-44	1.77279e-43	enriched	PHO87	Dal81-dependent	Stp2-dependent
C3_06740W_A	507.441	1.50978	0.158578	9.52076	1.71921e-21	8.36617e-21	enriched	CAWG_02985	Dal81-independent	Stp2-independent
C3_07660W_A	554.378	1.51099	0.153056	9.87218	5.49593e-23	2.83288e-22	enriched	CAWG_03072	Dal81-dependent	Stp2-dependent
C2_04680W_A	867.312	1.51193	0.18155	8.32789	8.22971e-17	3.23425e-16	enriched	TIM17	Dal81-independent	Stp2-independent
C5_03530C_A	203.643	1.51364	0.222264	6.8101	9.75285e-12	2.94301e-11	enriched	CAWG_04726	Dal81-dependent	Stp2-dependent
C5_00270W_A	8190.09	1.51406	0.111028	13.6368	2.41929e-42	2.22138e-41	enriched	PGA14	Dal81-dependent	Stp2-dependent
C5_04510W_A	1194.86	1.51439	0.135119	11.2078	3.73229e-29	2.37923e-28	enriched	GDE1	Dal81-independent	Stp2-independent
C4_03530W_A	193.961	1.51544	0.213505	7.0979	1.26667e-12	4.0118e-12	enriched	CAWG_03455	Dal81-independent	Stp2-independent
C4_02230C_A	28.9009	1.51649	0.442192	3.42948	0.000604741	0.0010093	enriched	CAWG_03571	Dal81-dependent	Stp2-dependent
C6_01090C_A	40.7747	1.51738	0.501722	3.02435	0.00249167	0.0039036	enriched	CAWG_05252	Dal81-independent	Stp2-independent
C6_01200W_A	96.5805	1.51942	0.274779	5.5296	3.20954e-08	7.75273e-08	enriched	CAWG_05241	Dal81-independent	Stp2-independent
C1_13110C_A	2338.97	1.5217	0.150264	10.1269	4.1991e-24	2.27168e-23	enriched	CHS3	Dal81-independent	Stp2-independent
C7_01880C_A	67.3732	1.52397	0.355324	4.28895	1.79518e-05	3.50002e-05	enriched	CAWG_05539	Dal81-dependent	Stp2-dependent
C5_05330C_A	553.653	1.52399	0.155361	9.80935	1.02627e-22	5.21382e-22	enriched	RER2	Dal81-dependent	Stp2-dependent
C3_07830W_A	1033.75	1.5273	0.128551	11.8809	1.48827e-32	1.03438e-31	enriched	FBP1	Dal81-dependent	Stp2-dependent
C1_00400W_A	1555.04	1.53218	0.1269	12.0739	1.45075e-33	1.0322e-32	enriched	SVF1	Dal81-independent	Stp2-independent
C2_05100C_A	2711.33	1.53289	0.123778	12.3842	3.18078e-35	2.37274e-34	enriched	ERF1	Dal81-dependent	Stp2-dependent
C1_01710W_A	794.171	1.53384	0.175569	8.73644	2.40579e-18	1.01809e-17	enriched	CAWG_01207	Dal81-independent	Stp2-independent
C2_08910C_A	738.152	1.53451	0.156304	9.81751	9.46567e-23	4.84168e-22	enriched	orf19.216	Dal81-independent	Stp2-independent
CR_00320C_A	4525.59	1.53525	0.122164	12.5672	3.20019e-36	2.46374e-35	enriched	NAP1	Dal81-independent	Stp2-independent
CR_00900W_A	550.446	1.5356	0.178683	8.59398	8.40091e-18	3.43647e-17	enriched	TRM1	Dal81-dependent	Stp2-dependent
C2_01050W_A	272.92	1.53666	0.204678	7.50768	6.01848e-14	2.04765e-13	enriched	orf19.2018.2	Dal81-dependent	Stp2-dependent
C2_08860W_A	2463.21	1.53715	0.129092	11.9074	1.08265e-32	7.55087e-32	enriched	CAWG_05969	Dal81-independent	Stp2-independent
C6_00800C_A	883.458	1.54543	0.148256	10.4241	1.92522e-25	1.0835e-24	enriched	CAWG_05279	Dal81-independent	Stp2-independent
C1_00200C_A	64.7593	1.54597	0.335348	4.61005	4.0258e-06	8.29044e-06	enriched	CAWG_01345	Dal81-independent	Stp2-independent
C1_12760W_A	639.24	1.54919	0.165408	9.36589	7.54131e-21	3.57989e-20	enriched	CAWG_00166	Dal81-dependent	Stp2-dependent
CR_03200C_A	741.419	1.54948	0.143781	10.7767	4.43671e-27	2.62229e-26	enriched	CAWG_01655	Dal81-dependent	Stp2-dependent
C2_01830W_A	317.909	1.54956	0.168514	9.19544	3.73468e-20	1.72248e-19	enriched	PRP39	Dal81-independent	Stp2-independent
C4_00970C_A	1257.15	1.54979	0.169157	9.16187	5.10036e-20	2.32556e-19	enriched	MDN1	Dal81-dependent	Stp2-dependent
C3_01060W_A	29.5173	1.55493	0.446534	3.48223	0.00049726	0.00083972	enriched	CAWG_00248	Dal81-independent	Stp2-independent
C4_03840C_A	472.609	1.5584	0.151681	10.2742	9.20913e-25	5.08747e-24	enriched	RRP42	Dal81-dependent	Stp2-dependent
C7_03490W_A	1142.33	1.5594	0.135156	11.5378	8.50356e-31	5.64242e-30	enriched	GYP7	Dal81-independent	Stp2-dependent
CR_07940W_A	407.711	1.5603	0.233807	6.67344	2.49875e-11	7.37346e-11	enriched	CAWG_02088	Dal81-dependent	Stp2-dependent
C2_08140C_A	3918.85	1.56349	0.126178	12.3912	2.91704e-35	2.18143e-34	enriched	PHM7	Dal81-independent	Stp2-independent
C7_02930C_A	1112.79	1.56601	0.153254	10.2184	1.63998e-24	8.98549e-24	enriched	CAWG_05620	Dal81-dependent	Stp2-dependent
C5_04960W_A	409.523	1.5667	0.172018	9.10776	8.40995e-20	3.79142e-19	enriched	CAWG_04862	Dal81-independent	Stp2-independent
C1_09840C_A	1365.96	1.56809	0.130794	11.989	4.05654e-33	2.85575e-32	enriched	CAWG_00447	Dal81-independent	Stp2-independent
C5_04560C_A	7313	1.56861	0.156083	10.0499	9.19872e-24	4.87971e-23	enriched	CUP1	Dal81-dependent	Stp2-dependent
C1_07980C_A	198.526	1.56929	0.282215	5.56061	2.68826e-08	6.52505e-08	enriched	CAWG_00624	Dal81-dependent	Stp2-dependent
CR_09170C_A	1883.57	1.57137	0.196839	7.98305	1.42759e-15	5.282e-15	enriched	SSU1	Dal81-dependent	Stp2-dependent
C6_00290W_A	3681.31	1.57203	0.167083	9.40871	5.02264e-21	2.4071e-20	enriched	CAWG_05329	Dal81-dependent	Stp2-independent
C3_05810C_A	189.759	1.57415	0.242864	6.48164	9.07313e-11	2.58709e-10	enriched	SKN1	Dal81-independent	Stp2-independent
C5_04090C_A	3736.19	1.5743	0.125219	12.5723	2.99732e-36	2.3162e-35	enriched	SUI1	Dal81-independent	Stp2-independent
C5_02490C_A	2061.49	1.57971	0.165006	9.57369	1.03155e-21	5.07743e-21	enriched	TIF5	Dal81-dependent	Stp2-dependent
C1_03370W_A	10165.1	1.58204	0.157946	10.0164	1.29169e-23	6.79214e-23	enriched	CAWG_01047	Dal81-independent	Stp2-independent
C2_04010C_A	1022.15	1.58416	0.194914	8.12749	4.38267e-16	1.65626e-15	enriched	HSP21	Dal81-dependent	Stp2-dependent
C1_07090C_A	1139.1	1.58507	0.14425	10.9884	4.34564e-28	2.67099e-27	enriched	CAWG_00707	Dal81-dependent	Stp2-dependent
CR_07420W_A	2331.81	1.58655	0.144452	10.9832	4.60138e-28	2.82528e-27	enriched	KGD2	Dal81-dependent	Stp2-dependent
C1_00770C_A	377.621	1.58969	0.177137	8.97438	2.8496e-19	1.25823e-18	enriched	ROT1	Dal81-independent	Stp2-independent
C6_01550C_A	360.133	1.59038	0.218643	7.2739	3.49247e-13	1.14228e-12	enriched	CAWG_05211	Dal81-independent	Stp2-independent
C7_02690C_A	686.171	1.59111	0.157343	10.1124	4.87007e-24	2.62982e-23	enriched	CAWG_05608	Dal81-independent	Stp2-independent
CR_04600W_A	903.081	1.59136	0.157045	10.1331	3.93761e-24	2.13213e-23	enriched	CAWG_01795	Dal81-independent	Stp2-independent
C1_04020C_A	3165.99	1.59368	0.123444	12.9102	3.94419e-38	3.20933e-37	enriched	CSH1	Dal81-independent	Stp2-independent
C5_00760W_A	569.034	1.59725	0.198825	8.03349	9.47419e-16	3.5337e-15	enriched	CAWG_04469	Dal81-independent	Stp2-independent
C7_03990C_A	705.623	1.59844	0.139987	11.4185	3.37834e-30	2.21232e-29	enriched	CAWG_05728	Dal81-dependent	Stp2-dependent
C1_11240C_A	753.393	1.60557	0.146693	10.9451	7.01568e-28	4.26408e-27	enriched	CHO1	Dal81-independent	Stp2-independent
C5_01790C_A	9.17515	1.60835	0.755119	2.12993	0.0331777	0.0449734	enriched	CAWG_04564	Dal81-dependent	Stp2-independent
C3_03800W_A	9777.79	1.60903	0.157576	10.2111	1.76855e-24	9.65469e-24	enriched	PTR22	Dal81-independent	Stp2-independent
CR_04300W_A	3023.86	1.60941	0.118188	13.6173	3.15839e-42	2.88678e-41	enriched	CAWG_01767	Dal81-dependent	Stp2-dependent
C2_00790C_A	1287.67	1.60971	0.117289	13.7243	7.26179e-43	6.72948e-42	enriched	CAWG_03858	Dal81-dependent	Stp2-dependent
C3_07640C_A	1381.17	1.61096	0.145725	11.0548	2.07851e-28	1.28675e-27	enriched	FUM12	Dal81-dependent	Stp2-dependent
C1_12010C_A	411.472	1.61328	0.200283	8.05501	7.94713e-16	2.96967e-15	enriched	KIP4	Dal81-independent	Stp2-independent
CR_03380W_A	621.183	1.61337	0.13742	11.7405	7.90595e-32	5.37658e-31	enriched	MTG1	Dal81-dependent	Stp2-dependent
CR_07270C_A	175.346	1.61403	0.239963	6.72615	1.74213e-11	5.18667e-11	enriched	HGT16	Dal81-independent	Stp2-independent
C6_02270C_A	591.584	1.61464	0.153048	10.5499	5.08555e-26	2.90292e-25	enriched	ALG11	Dal81-independent	Stp2-dependent
CR_01200W_A	120.673	1.61575	0.251526	6.42379	1.32926e-10	3.75811e-10	enriched	OYE22	Dal81-independent	Stp2-independent
CR_06640C_A	889.636	1.61962	0.174353	9.28932	1.55272e-20	7.25607e-20	enriched	CAWG_01963	Dal81-independent	Stp2-independent
C5_05230C_A	5647.56	1.62262	0.175678	9.23629	2.55202e-20	1.17974e-19	enriched	CAWG_04889	Dal81-independent	Stp2-independent
C2_03520C_A	2260.07	1.62363	0.146694	11.0682	1.79038e-28	1.11067e-27	enriched	ADAEC	Dal81-independent	Stp2-dependent
C6_00280W_A	3763.17	1.62368	0.106636	15.2263	2.36487e-52	2.91603e-51	enriched	CPH2	Dal81-independent	Stp2-independent
CR_01600C_A	312.595	1.62438	0.19857	8.18036	2.82995e-16	1.08172e-15	enriched	orf19.2547	Dal81-dependent	Stp2-dependent
C2_04860W_A	477.277	1.62555	0.149994	10.8374	2.2879e-27	1.37114e-26	enriched	PZF1	Dal81-dependent	Stp2-dependent
CR_02850C_A	1822.05	1.62573	0.155967	10.4236	1.93516e-25	1.08807e-24	enriched	GZF3	Dal81-independent	Stp2-independent
C5_00690C_A	342.547	1.6266	0.195922	8.30228	1.02133e-16	3.98772e-16	enriched	TFB3	Dal81-independent	Stp2-independent
C4_01130C_A	120.57	1.62781	0.278528	5.84433	5.08613e-09	1.30189e-08	enriched	CAWG_03669	Dal81-independent	Stp2-independent
C5_01580C_A	34524.7	1.62842	0.151369	10.758	5.4361e-27	3.19411e-26	enriched	CEF3	Dal81-dependent	Stp2-dependent
C3_06120C_A	2414.05	1.63522	0.127314	12.844	9.2982e-38	7.47466e-37	enriched	GDA1	Dal81-independent	Stp2-independent
C5_03350W_A	3833.15	1.63803	0.15325	10.6886	1.15074e-26	6.7024e-26	enriched	QCR2	Dal81-independent	Stp2-independent
C2_09360W_A	392.497	1.64105	0.158885	10.3286	5.23426e-25	2.91034e-24	enriched	CAWG_06013	Dal81-independent	Stp2-independent
C3_06940W_A	1858.69	1.64318	0.169412	9.69933	3.03488e-22	1.51744e-21	enriched	CAWG_03003	Dal81-independent	Stp2-independent
C5_04170W_A	1145.36	1.64361	0.152582	10.7719	4.67059e-27	2.7551e-26	enriched	CAWG_04790	Dal81-independent	Stp2-independent
C2_03500W_A	1352.87	1.64426	0.144028	11.4162	3.46894e-30	2.26917e-29	enriched	CAWG_04117	Dal81-independent	Stp2-independent
C3_00030C_A	386.472	1.6447	0.167172	9.83833	7.69798e-23	3.95097e-22	enriched	orf19.5469	Dal81-independent	Stp2-independent
C4_02660W_A	151.058	1.64646	0.228245	7.21357	5.45022e-13	1.7672e-12	enriched	CAWG_03536	Dal81-dependent	Stp2-dependent
C1_09020W_A	918.145	1.64687	0.165894	9.92725	3.16882e-23	1.64751e-22	enriched	CAWG_00527	Dal81-independent	Stp2-independent
C7_01580W_A	1534.71	1.64773	0.13542	12.1675	4.62849e-34	3.34868e-33	enriched	SMC6	Dal81-independent	Stp2-independent
C7_03550C_A	13.755	1.64849	0.692369	2.38094	0.0172683	0.0243076	enriched	orf19.6687	Dal81-dependent	Stp2-dependent
C2_09350W_A	203.888	1.65358	0.215522	7.6724	1.68802e-14	5.89334e-14	enriched	TAZ1	Dal81-independent	Stp2-independent
C7_02460C_A	1102.08	1.65732	0.128413	12.9062	4.1535e-38	3.37051e-37	enriched	CAWG_05590	Dal81-dependent	Stp2-dependent
C2_04520C_A	117.623	1.65733	0.276342	5.99738	2.00524e-09	5.26519e-09	enriched	CAWG_04208	Dal81-dependent	Stp2-independent
C3_04530C_A	1126.99	1.65957	0.184527	8.99365	2.39143e-19	1.05982e-18	enriched	TEC1	Dal81-dependent	Stp2-independent
CR_05050W_A	23658.4	1.6598	0.112545	14.7479	3.17452e-49	3.58327e-48	enriched	GLN1	Dal81-dependent	Stp2-independent
C2_08280W_A	420.229	1.66015	0.174231	9.52843	1.5968e-21	7.7768e-21	enriched	EAF3	Dal81-independent	Stp2-independent
C1_09430W_A	990.491	1.66133	0.152403	10.9009	1.14112e-27	6.89376e-27	enriched	orf19.4805	Dal81-independent	Stp2-independent
C3_07160W_A	406.078	1.66185	0.171263	9.70345	2.91464e-22	1.45854e-21	enriched	PGA32	Dal81-independent	Stp2-independent
C5_03980W_A	693.934	1.66394	0.142405	11.6846	1.52807e-31	1.02871e-30	enriched	CAWG_04770	Dal81-independent	Stp2-independent
C1_12630C_A	176.174	1.66727	0.269732	6.18121	6.36122e-10	1.72768e-09	enriched	CAWG_00179	Dal81-dependent	Stp2-dependent
C5_02970W_A	951.069	1.66961	0.138925	12.0181	2.8541e-33	2.01871e-32	enriched	DAP2	Dal81-independent	Stp2-independent
C5_04980W_A	81.915	1.67044	0.280559	5.95398	2.61697e-09	6.82367e-09	enriched	CAWG_04864	Dal81-dependent	Stp2-dependent
CR_03540W_A	331.745	1.67174	0.193888	8.62217	6.56946e-18	2.70203e-17	enriched	CAWG_01689	Dal81-independent	Stp2-independent
C5_00280C_A	946.122	1.67517	0.150487	11.1316	8.79962e-29	5.51584e-28	enriched	CAWG_04423	Dal81-independent	Stp2-dependent
C2_05960C_A	73.9905	1.6756	0.299388	5.59675	2.18408e-08	5.35759e-08	enriched	CAWG_04340	Dal81-dependent	Stp2-dependent
CR_09110C_A	803.22	1.67579	0.15034	11.1466	7.43607e-29	4.68067e-28	enriched	CAWG_02185	Dal81-independent	Stp2-independent
C2_06390C_A	8430.15	1.67744	0.157673	10.6387	1.9676e-26	1.13939e-25	enriched	IMH3	Dal81-dependent	Stp2-dependent
C1_08610C_A	5995.19	1.67897	0.200978	8.35396	6.60093e-17	2.60096e-16	enriched	CAWG_00564	Dal81-independent	Stp2-dependent
C2_05670C_A	285.245	1.6821	0.190721	8.81968	1.14792e-18	4.9414e-18	enriched	CAWG_04313	Dal81-dependent	Stp2-dependent
C5_01160C_A	34.4371	1.68323	0.450293	3.73808	0.000185433	0.000327796	enriched	snR69	Dal81-dependent	Stp2-dependent
C1_09370W_A	937.611	1.6838	0.138842	12.1274	7.55737e-34	5.43497e-33	enriched	CEF1	Dal81-dependent	Stp2-dependent
C7_02880C_A	11.0358	1.68494	0.731485	2.30345	0.0212534	0.0295844	enriched	LIP9	Dal81-dependent	Stp2-dependent
C2_03000C_A	447.078	1.68805	0.176897	9.54256	1.39351e-21	6.80326e-21	enriched	CAWG_04067	Dal81-dependent	Stp2-dependent
C4_04530C_A	242.585	1.69101	0.216849	7.7981	6.28445e-15	2.25437e-14	enriched	PHR1	Dal81-dependent	Stp2-dependent
C1_11280W_A	442.245	1.69148	0.189179	8.94113	3.8522e-19	1.69387e-18	enriched	CAWG_00308	Dal81-independent	Stp2-independent
C1_02050C_A	2441.02	1.69503	0.129127	13.1268	2.31105e-39	1.94096e-38	enriched	PHO91	Dal81-independent	Stp2-independent
C1_05930C_A	699.8	1.6961	0.159727	10.6187	2.43827e-26	1.40922e-25	enriched	CAWG_00814	Dal81-dependent	Stp2-independent
C6_03120W_A	895.382	1.69634	0.138898	12.2129	2.65376e-34	1.92927e-33	enriched	POL5	Dal81-dependent	Stp2-dependent
C1_10200C_A	1768.45	1.69644	0.134094	12.6512	1.10216e-36	8.64029e-36	enriched	CAWG_00413	Dal81-independent	Stp2-independent
C7_01920W_A	6157.61	1.69714	0.12623	13.4449	3.29912e-41	2.92201e-40	enriched	CDC34	Dal81-dependent	Stp2-independent
C6_00520W_A	97.0331	1.69883	0.279897	6.06949	1.2832e-09	3.41108e-09	enriched	orf19.4207	Dal81-dependent	Stp2-dependent
C1_10290W_A	66.838	1.70012	0.319421	5.32251	1.02348e-07	2.39796e-07	enriched	GCA1	Dal81-independent	Stp2-independent
C4_00540C_A	1596.65	1.7009	0.145481	11.6916	1.40789e-31	9.50997e-31	enriched	NMD5	Dal81-dependent	Stp2-dependent
CR_07250C_A	206.663	1.70123	0.199247	8.53829	1.3622e-17	5.53828e-17	enriched	CAWG_02023	Dal81-dependent	Stp2-dependent
C2_00750W_A	208.825	1.70141	0.235031	7.23911	4.5164e-13	1.47237e-12	enriched	CAWG_03854	Dal81-dependent	Stp2-dependent
C7_03880C_A	291.853	1.70258	0.244764	6.956	3.5008e-12	1.07586e-11	enriched	CAWG_05718	Dal81-dependent	Stp2-independent
C1_07640C_A	87.4153	1.70311	0.363463	4.68578	2.78899e-06	5.79912e-06	enriched	CAWG_00655	Dal81-independent	Stp2-independent
C3_07200C_A	282.446	1.70392	0.224118	7.6028	2.89785e-14	9.99517e-14	enriched	ZFU2	Dal81-independent	Stp2-independent
C1_00640C_A	2162.93	1.70545	0.17526	9.73096	2.22474e-22	1.11702e-21	enriched	RPO41	Dal81-dependent	Stp2-dependent
CR_04360C_A	2138.18	1.70801	0.124921	13.6727	1.47763e-42	1.36301e-41	enriched	NHP2	Dal81-dependent	Stp2-dependent
C6_02380W_A	3054.11	1.70835	0.127593	13.3891	7.00446e-41	6.13145e-40	enriched	CAWG_05128	Dal81-dependent	Stp2-dependent
C5_00700C_A	2872.7	1.7127	0.158883	10.7797	4.29482e-27	2.54093e-26	enriched	SPE2	Dal81-dependent	Stp2-dependent
C1_09700W_A	70.945	1.71297	0.308681	5.54933	2.8677e-08	6.94658e-08	enriched	CAWG_00460	Dal81-independent	Stp2-independent
C5_03260C_A	468.942	1.71685	0.159964	10.7328	7.14101e-27	4.17951e-26	enriched	CAWG_04702	Dal81-independent	Stp2-independent
C2_03110W_A	34.1408	1.71692	0.440623	3.89656	9.75682e-05	0.000176795	enriched	CAWG_04078	Dal81-independent	Stp2-independent
C7_01440W_A	164.262	1.71694	0.219647	7.8168	5.41842e-15	1.94719e-14	enriched	CAWG_05495	Dal81-independent	Stp2-independent
C7_01760C_A	1648.84	1.72026	0.120502	14.2758	3.09839e-46	3.18048e-45	enriched	ISU1	Dal81-dependent	Stp2-independent
C7_00940W_A	2493.26	1.72215	0.116069	14.8373	8.41114e-50	9.6391e-49	enriched	KEX1	Dal81-independent	Stp2-independent
C7_03930C_A	1932.54	1.72234	0.12888	13.3639	9.82876e-41	8.57874e-40	enriched	MAM33	Dal81-independent	Stp2-independent
C1_12790C_A	2005.44	1.72474	0.135348	12.7431	3.40763e-37	2.69247e-36	enriched	FEN1	Dal81-dependent	Stp2-dependent
C2_00140W_A	3008.38	1.72526	0.142663	12.0933	1.1459e-33	8.2016e-33	enriched	NDT80	Dal81-dependent	Stp2-dependent
C5_03680W_A	1507.87	1.72669	0.118593	14.5597	5.06576e-48	5.48106e-47	enriched	FGR27	Dal81-independent	Stp2-independent
C6_03370W_A	2469.61	1.74059	0.522313	3.33246	0.000860803	0.00141581	enriched	CAWG_05033	Dal81-independent	Stp2-independent
C5_04860C_A	317.982	1.74374	0.193611	9.00642	2.12901e-19	9.46313e-19	enriched	CAWG_04852	Dal81-dependent	Stp2-dependent
CR_02550C_A	597.477	1.74532	0.15661	11.1444	7.62694e-29	4.79579e-28	enriched	CAWG_01595	Dal81-dependent	Stp2-dependent
C5_01900C_A	180.582	1.75178	0.200426	8.74028	2.32527e-18	9.84715e-18	enriched	CAWG_04575	Dal81-dependent	Stp2-dependent
C4_00160C_A	3772.85	1.75494	0.122798	14.2912	2.48126e-46	2.5734e-45	enriched	CAR2	Dal81-dependent	Stp2-dependent
C4_00940W_A	198.722	1.75555	0.233179	7.52874	5.12322e-14	1.75099e-13	enriched	CAWG_03688	Dal81-dependent	Stp2-dependent
C2_08530C_A	258.845	1.75817	0.226387	7.76621	8.08692e-15	2.88201e-14	enriched	CAWG_05937	Dal81-dependent	Stp2-dependent
C2_02080W_A	38.8037	1.75981	0.469065	3.75174	0.000175609	0.000311623	enriched	snR48	Dal81-dependent	Stp2-dependent
C5_01840C_A	719.177	1.76264	0.137806	12.7908	1.84667e-37	1.47072e-36	enriched	TAC1	Dal81-independent	Stp2-independent
C7_01260W_A	10.6841	1.76294	0.832692	2.11716	0.0342465	0.046349	enriched	snR24	Dal81-dependent	Stp2-dependent
C4_04810C_A	519.387	1.76359	0.174436	10.1102	4.97766e-24	2.67839e-23	enriched	CAWG_03335	Dal81-dependent	Stp2-dependent
C7_00500W_A	1916.74	1.76487	0.142953	12.3458	5.13424e-35	3.81102e-34	enriched	CAWG_05407	Dal81-dependent	Stp2-independent
C4_00490W_A	188.079	1.77038	0.211556	8.36838	5.84151e-17	2.30778e-16	enriched	CAWG_03712	Dal81-dependent	Stp2-dependent
CR_02510W_A	1160.37	1.77059	0.158669	11.159	6.46913e-29	4.08487e-28	enriched	CAWG_01591	Dal81-independent	Stp2-independent
C7_00490C_A	1838.52	1.77081	0.149189	11.8696	1.70307e-32	1.17822e-31	enriched	CAWG_05406	Dal81-dependent	Stp2-dependent
C1_09560C_A	13.8356	1.77403	0.732314	2.42249	0.0154145	0.0218311	enriched	snR31a	Dal81-independent	Stp2-independent
C7_04150W_A	430.092	1.77501	0.176541	10.0544	8.78459e-24	4.67241e-23	enriched	CAWG_05744	Dal81-dependent	Stp2-independent
C2_06970W_A	1999.8	1.77638	0.12649	14.0437	8.42141e-45	8.26317e-44	enriched	AAH1	Dal81-dependent	Stp2-dependent
C1_12670C_A	397.208	1.77917	0.214842	8.28126	1.21874e-16	4.74614e-16	enriched	CAWG_00175	Dal81-dependent	Stp2-dependent
C6_00620W_A	274.407	1.78348	0.204014	8.74193	2.29151e-18	9.71104e-18	enriched	FCA1	Dal81-independent	Stp2-independent
C3_04660C_A	270.05	1.78371	0.215437	8.27947	1.23727e-16	4.81516e-16	enriched	ARG11	Dal81-dependent	Stp2-dependent
C7_01350C_A	247.624	1.78644	0.216688	8.24431	1.66116e-16	6.4026e-16	enriched	CAWG_05486	Dal81-independent	Stp2-independent
C3_03110W_A	303.435	1.78858	0.185267	9.65406	4.72478e-22	2.3487e-21	enriched	orf19.308	Dal81-independent	Stp2-independent
C3_05980C_A	490.402	1.79209	0.181674	9.86432	5.94351e-23	3.05833e-22	enriched	FAA2	Dal81-independent	Stp2-dependent
C7_01510W_A	328.757	1.79394	0.185302	9.68116	3.62588e-22	1.80842e-21	enriched	CAWG_05502	Dal81-dependent	Stp2-dependent
C3_05610W_A	335.404	1.79592	0.195365	9.19267	3.83209e-20	1.76605e-19	enriched	MNN14	Dal81-dependent	Stp2-independent
C2_07820C_A	457.403	1.79847	0.165941	10.8381	2.27247e-27	1.36326e-26	enriched	PHO86	Dal81-independent	Stp2-independent
CR_03660C_A	206.188	1.80161	0.251998	7.14929	8.72265e-13	2.78614e-12	enriched	CAWG_01702	Dal81-independent	Stp2-independent
C5_03700C_A	205.451	1.80307	0.199974	9.01652	1.94152e-19	8.64899e-19	enriched	CAWG_04742	Dal81-dependent	Stp2-dependent
C4_02760C_A	749.478	1.80419	0.1573	11.4697	1.87217e-30	1.23137e-29	enriched	CGR1	Dal81-independent	Stp2-independent
CR_07670W_A	414.778	1.80461	0.187819	9.60824	7.38006e-22	3.65052e-21	enriched	CAWG_02063	Dal81-independent	Stp2-independent
C2_08820C_A	8.76121	1.80862	0.839297	2.15492	0.031168	0.0424312	enriched	SPO11	Dal81-independent	Stp2-dependent
C1_14080W_A	2689.02	1.81473	0.165506	10.9647	5.64834e-28	3.45752e-27	enriched	CAWG_00046	Dal81-dependent	Stp2-dependent
C3_02710W_A	2744.82	1.81773	0.154881	11.7363	8.29969e-32	5.6316e-31	enriched	orf19.263.1	Dal81-independent	Stp2-independent
C2_05820W_A	532.909	1.82101	0.145795	12.4902	8.44489e-36	6.3949e-35	enriched	CAWG_04328	Dal81-dependent	Stp2-dependent
C6_03930W_A	572.593	1.822	0.152082	11.9804	4.50029e-33	3.16443e-32	enriched	OPT8	Dal81-independent	Stp2-independent
C2_06000W_A	575.182	1.82435	0.146112	12.486	8.89994e-36	6.731e-35	enriched	LAS1	Dal81-dependent	Stp2-dependent
C1_07120W_A	7617.69	1.82448	0.124665	14.6351	1.67839e-48	1.83918e-47	enriched	GAP4	Dal81-dependent	Stp2-dependent
C1_05870W_A	409.759	1.82529	0.209448	8.71479	2.91311e-18	1.2233e-17	enriched	PRN3	Dal81-dependent	Stp2-dependent
C1_09010W_A	835.802	1.82543	0.145347	12.5591	3.54399e-36	2.72492e-35	enriched	NAR1	Dal81-dependent	Stp2-dependent
C5_04900C_A	1087.71	1.82675	0.16043	11.3866	4.87619e-30	3.16899e-29	enriched	CAWG_04856	Dal81-dependent	Stp2-dependent
CR_02740W_A	1221.23	1.82676	0.162661	11.2305	2.88825e-29	1.8451e-28	enriched	INN1	Dal81-independent	Stp2-independent
C1_08830C_A	47.7363	1.82685	0.387009	4.72043	2.35349e-06	4.91743e-06	enriched	CAWG_00543	Dal81-dependent	Stp2-dependent
C5_05430W_A	327.905	1.82688	0.2033	8.98615	2.56048e-19	1.1339e-18	enriched	PEX4	Dal81-independent	Stp2-independent
C1_04350C_A	228.703	1.8275	0.185365	9.8589	6.27335e-23	3.22529e-22	enriched	CAWG_00958	Dal81-dependent	Stp2-dependent
C5_02020C_A	834.82	1.82906	0.131154	13.946	3.32891e-44	3.22942e-43	enriched	CAWG_04587	Dal81-dependent	Stp2-dependent
C2_02710C_A	968.248	1.83715	0.127753	14.3805	6.86132e-47	7.14077e-46	enriched	CAWG_04039	Dal81-dependent	Stp2-dependent
C1_05730W_A	9.59709	1.83717	0.806403	2.27823	0.0227131	0.0314703	enriched	snR39b	Dal81-dependent	Stp2-dependent
C4_06610C_A	4291.34	1.83725	0.194285	9.45645	3.18585e-21	1.53787e-20	enriched	SDH12	Dal81-dependent	Stp2-dependent
C7_03270W_A	1493.2	1.84153	0.165349	11.1373	8.26138e-29	5.18387e-28	enriched	CAWG_05660	Dal81-independent	Stp2-independent
C3_06950W_A	289.907	1.84453	0.180586	10.2141	1.7144e-24	9.37611e-24	enriched	orf19.6805	Dal81-independent	Stp2-independent
C2_07890W_A	1547.16	1.84514	0.138748	13.2985	2.36101e-40	2.04882e-39	enriched	PRS5	Dal81-independent	Stp2-independent
C3_06130W_A	40.4924	1.84684	0.43958	4.20138	2.65295e-05	5.08814e-05	enriched	CAWG_02922	Dal81-independent	Stp2-independent
C7_01910C_A	230.879	1.84709	0.218801	8.44185	3.12345e-17	1.25042e-16	enriched	CAWG_05542	Dal81-dependent	Stp2-independent
CR_10140W_A	2176.87	1.8496	0.179689	10.2934	7.54997e-25	4.17858e-24	enriched	CAWG_02275	Dal81-independent	Stp2-independent
C5_01250W_A	757.857	1.85049	0.170946	10.825	2.62127e-27	1.56624e-26	enriched	GPR1	Dal81-dependent	Stp2-independent
C5_01020C_A	162.925	1.85075	0.24514	7.54975	4.36089e-14	1.49726e-13	enriched	CAWG_04492	Dal81-dependent	Stp2-dependent
C3_04070C_A	1348.36	1.85304	0.158453	11.6946	1.359e-31	9.19007e-31	enriched	CDR11	Dal81-dependent	Stp2-dependent
CR_06440C_A	964.963	1.85441	0.165666	11.1937	4.37832e-29	2.7822e-28	enriched	BCR1	Dal81-independent	Stp2-independent
C2_01070W_A	1256.46	1.85662	0.143683	12.9216	3.39895e-38	2.7732e-37	enriched	CAWG_03884	Dal81-dependent	Stp2-dependent
C6_02080W_A	211.219	1.85738	0.2289	8.11436	4.88337e-16	1.84316e-15	enriched	CAWG_05160	Dal81-dependent	Stp2-dependent
CR_08470W_A	663.733	1.85833	0.144092	12.8968	4.68932e-38	3.80019e-37	enriched	CAWG_02134	Dal81-independent	Stp2-dependent
C1_10880W_A	2114.83	1.86226	0.149796	12.432	1.753e-35	1.3142e-34	enriched	CAWG_00345	Dal81-dependent	Stp2-dependent
C6_03850C_A	152.317	1.8634	0.254377	7.32536	2.38265e-13	7.88309e-13	enriched	IHD1	Dal81-dependent	Stp2-dependent
C1_01910W_A	1162.73	1.86456	0.143575	12.9866	1.45741e-38	1.20051e-37	enriched	CAWG_01189	Dal81-dependent	Stp2-dependent
C3_05460W_A	655.319	1.86469	0.164679	11.3232	1.00748e-29	6.49133e-29	enriched	CAWG_02859	Dal81-dependent	Stp2-dependent
C1_11260C_A	111.408	1.86548	0.351439	5.30811	1.10766e-07	2.59015e-07	enriched	orf19.675.1	Dal81-independent	Stp2-independent
CR_01160W_A	12.0877	1.86847	0.75303	2.48126	0.0130917	0.0186825	enriched	CAWG_01469	Dal81-dependent	Stp2-independent
C3_04910C_A	2099.49	1.86927	0.18699	9.99661	1.57697e-23	8.2417e-23	enriched	NCE102	Dal81-dependent	Stp2-dependent
C2_00860C_A	115.924	1.86936	0.267932	6.97702	3.01514e-12	9.31373e-12	enriched	CAWG_03865	Dal81-dependent	Stp2-dependent
C4_00100C_A	691.094	1.86983	0.152615	12.2519	1.64028e-34	1.19683e-33	enriched	CAWG_03774	Dal81-independent	Stp2-dependent
C5_00460C_A	532.8	1.87167	0.216216	8.65646	4.86647e-18	2.01957e-17	enriched	FET33	Dal81-independent	Stp2-dependent
C3_01710C_A	464.044	1.87241	0.215972	8.66966	4.33429e-18	1.80495e-17	enriched	PPT1	Dal81-independent	Stp2-independent
C6_02440C_A	235.292	1.87373	0.207136	9.0459	1.48442e-19	6.63734e-19	enriched	PRP45	Dal81-dependent	Stp2-dependent
C1_13930W_A	1539.2	1.87511	0.139429	13.4485	3.14323e-41	2.79631e-40	enriched	SSK1	Dal81-independent	Stp2-dependent
C1_09390W_A	235.555	1.87851	0.196591	9.55541	1.23099e-21	6.02946e-21	enriched	CAWG_00490	Dal81-dependent	Stp2-dependent
C6_04180W_A	722.703	1.88373	0.171744	10.9682	5.4319e-28	3.32843e-27	enriched	CAWG_04960	Dal81-independent	Stp2-independent
C4_01560C_A	493.362	1.8847	0.166962	11.2883	1.49988e-29	9.65356e-29	enriched	CAWG_03629	Dal81-dependent	Stp2-dependent
C5_02940C_A	6550.81	1.88541	0.129726	14.5337	7.40589e-48	7.92733e-47	enriched	MIG1	Dal81-dependent	Stp2-dependent
C2_08000C_A	5394.07	1.88732	0.157935	11.95	6.49357e-33	4.54474e-32	enriched	KRE30	Dal81-dependent	Stp2-dependent
C1_14160W_A	373.96	1.88843	0.227671	8.29453	1.09016e-16	4.24814e-16	enriched	CAWG_00038	Dal81-dependent	Stp2-dependent
C6_02670C_A	1827.39	1.88978	0.139043	13.5913	4.50803e-42	4.09542e-41	enriched	WSC2	Dal81-independent	Stp2-dependent
C1_06130C_A	1272.72	1.8898	0.126436	14.9467	1.637e-50	1.89772e-49	enriched	HAC1	Dal81-dependent	Stp2-independent
C1_02090C_A	486.326	1.89141	0.150407	12.5753	2.88734e-36	2.23723e-35	enriched	CAWG_01174	Dal81-dependent	Stp2-dependent
C5_04080C_A	519.976	1.89374	0.166572	11.3689	5.97099e-30	3.85961e-29	enriched	CAWG_04781	Dal81-dependent	Stp2-dependent
C2_08830W_A	556.157	1.89756	0.170502	11.1293	9.0341e-29	5.65691e-28	enriched	CAWG_05966	Dal81-independent	Stp2-independent
C1_02530C_A	1438.18	1.89788	0.122258	15.5235	2.40558e-54	3.14717e-53	enriched	DIP5	Dal81-dependent	Stp2-dependent
CR_07060C_A	8855.31	1.89804	0.432462	4.38891	1.13921e-05	2.25897e-05	enriched	CRZ2	Dal81-dependent	Stp2-dependent
CR_07960C_A	815.858	1.89882	0.133297	14.2451	4.80786e-46	4.89342e-45	enriched	TRK1	Dal81-independent	Stp2-dependent
C5_01140C_A	1355.29	1.89982	0.142967	13.2885	2.69886e-40	2.3319e-39	enriched	CAWG_04503	Dal81-independent	Stp2-independent
C1_04510W_A	393.406	1.89983	0.16831	11.2877	1.50985e-29	9.70733e-29	enriched	CAWG_00943	Dal81-dependent	Stp2-dependent
CR_07310W_A	508.42	1.90071	0.154691	12.2872	1.06162e-34	7.80298e-34	enriched	CAWG_02029	Dal81-dependent	Stp2-dependent
C1_05360C_A	1040.35	1.90221	0.140136	13.574	5.71267e-42	5.17414e-41	enriched	CAWG_00865	Dal81-dependent	Stp2-dependent
C4_03100W_A	18.0903	1.90377	0.612488	3.10825	0.001882	0.00298348	enriched	RBT7	Dal81-dependent	Stp2-dependent
C2_06400C_A	9.15624	1.90502	0.891911	2.13589	0.0326885	0.0443445	enriched	snR54	Dal81-dependent	Stp2-dependent
C4_00860C_A	633.978	1.90516	0.148577	12.8227	1.22373e-37	9.79802e-37	enriched	CAWG_03695	Dal81-independent	Stp2-independent
C4_05650W_A	565.777	1.91062	0.159801	11.9562	6.02348e-33	4.22065e-32	enriched	CAWG_03257	Dal81-dependent	Stp2-dependent
C1_09210C_A	2478.52	1.91372	0.152206	12.5732	2.96517e-36	2.29457e-35	enriched	CAWG_00508	Dal81-independent	Stp2-independent
C2_04640C_A	701.852	1.91457	0.138184	13.8552	1.18299e-43	1.12581e-42	enriched	SNU114	Dal81-dependent	Stp2-independent
C6_04320C_A	49.3539	1.91686	0.402419	4.76335	1.90404e-06	4.00903e-06	enriched	CAWG_04947	Dal81-dependent	Stp2-dependent
C2_09240C_A	104.543	1.91718	0.3442	5.56995	2.54811e-08	6.20244e-08	enriched	orf19.4085	Dal81-independent	Stp2-independent
C7_01010W_A	48.1362	1.91789	0.386785	4.95854	7.1026e-07	1.5606e-06	enriched	CAWG_05459	Dal81-dependent	Stp2-dependent
C7_00840C_A	396.165	1.9192	0.164186	11.6892	1.44711e-31	9.75299e-31	enriched	orf19.7033	Dal81-dependent	Stp2-independent
C3_04380C_A	2836.85	1.92078	0.1523	12.6119	1.81677e-36	1.41317e-35	enriched	CAWG_02750	Dal81-dependent	Stp2-dependent
C2_09220W_A	4230.53	1.92246	0.156867	12.2553	1.57331e-34	1.14936e-33	enriched	DDR48	Dal81-dependent	Stp2-dependent
C2_03080W_A	3452.48	1.92256	0.158972	12.0937	1.14065e-33	8.17372e-33	enriched	IDH2	Dal81-independent	Stp2-independent
CR_07800W_A	250.208	1.92392	0.183874	10.4632	1.27459e-25	7.22068e-25	enriched	SAP2	Dal81-independent	Stp2-independent
C1_02850W_A	952.445	1.92671	0.172728	11.1546	6.79837e-29	4.28376e-28	enriched	CAWG_01099	Dal81-independent	Stp2-independent
C6_04240W_A	152.929	1.92717	0.256124	7.52435	5.29842e-14	1.80779e-13	enriched	CAWG_04955	Dal81-dependent	Stp2-dependent
C1_03810C_A	188.037	1.92894	0.222851	8.65572	4.89795e-18	2.03123e-17	enriched	ELA1	Dal81-independent	Stp2-independent
C5_01910W_A	6257.92	1.92901	0.153434	12.5722	3.00083e-36	2.3162e-35	enriched	GIS2	Dal81-dependent	Stp2-dependent
C3_00040W_A	160.409	1.92915	0.212687	9.07039	1.18592e-19	5.31847e-19	enriched	orf19.5472	Dal81-independent	Stp2-independent
C6_00920W_A	1544.96	1.92983	0.184797	10.443	1.57763e-25	8.89546e-25	enriched	CAWG_05267	Dal81-dependent	Stp2-dependent
C7_02920W_A	414.515	1.9325	0.215192	8.98034	2.6993e-19	1.19361e-18	enriched	CAWG_05621	Dal81-dependent	Stp2-independent
C1_10050W_A	16.7831	1.93288	0.708874	2.72669	0.00639725	0.00954422	enriched	CAWG_00427	Dal81-independent	Stp2-independent
C3_02750W_A	155.088	1.93344	0.315049	6.13694	8.41255e-10	2.2613e-09	enriched	CAWG_02595	Dal81-dependent	Stp2-dependent
CR_01710W_A	283.23	1.93354	0.199364	9.69854	3.05855e-22	1.528e-21	enriched	CAWG_01521	Dal81-dependent	Stp2-dependent
C4_02820W_A	123.468	1.93601	0.267915	7.2262	4.96712e-13	1.61405e-12	enriched	CAWG_03516	Dal81-dependent	Stp2-dependent
C4_06410W_A	415.009	1.93818	0.174337	11.1174	1.03192e-28	6.43475e-28	enriched	CAWG_03186	Dal81-dependent	Stp2-dependent
C4_05330C_A	1180.32	1.93962	0.131712	14.7262	4.37853e-49	4.86908e-48	enriched	CAWG_03281	Dal81-dependent	Stp2-dependent
C4_03620C_A	543.802	1.94266	0.165385	11.7463	7.37944e-32	5.02421e-31	enriched	CDR3	Dal81-independent	Stp2-independent
C2_06680W_A	1070.73	1.94468	0.14662	13.2634	3.77201e-40	3.24512e-39	enriched	FRP3	Dal81-independent	Stp2-dependent
C1_10160W_A	5908.98	1.94856	0.129466	15.0507	3.41584e-51	4.08608e-50	enriched	MIR1	Dal81-independent	Stp2-independent
C3_04940W_A	516.178	1.94907	0.158116	12.3268	6.49556e-35	4.78599e-34	enriched	CAWG_02806	Dal81-independent	Stp2-independent
C6_01720C_A	3565.9	1.95024	0.154459	12.6263	1.51236e-36	1.18251e-35	enriched	SUR7	Dal81-independent	Stp2-independent
CR_07200W_A	370.749	1.95396	0.176096	11.096	1.31229e-28	8.15764e-28	enriched	CAWG_02018	Dal81-independent	Stp2-independent
C7_00560C_A	336.891	1.95457	0.180958	10.8012	3.39608e-27	2.01916e-26	enriched	THG1	Dal81-dependent	Stp2-dependent
C1_03830C_A	737.676	1.95769	0.132866	14.7343	3.88114e-49	4.33202e-48	enriched	CAWG_01008	Dal81-dependent	Stp2-dependent
C7_01940C_A	3465.38	1.96091	0.179587	10.919	9.35043e-28	5.67165e-27	enriched	orf19.6527	Dal81-independent	Stp2-independent
C7_02090C_A	285.943	1.96196	0.181699	10.7978	3.5242e-27	2.09326e-26	enriched	CAWG_05559	Dal81-dependent	Stp2-independent
C3_05140C_A	817.691	1.9661	0.157835	12.4567	1.2864e-35	9.69235e-35	enriched	CAWG_02826	Dal81-dependent	Stp2-dependent
C5_03900W_A	40158.2	1.97368	0.124144	15.8983	6.51461e-57	9.0347e-56	enriched	PGA56	Dal81-dependent	Stp2-dependent
C1_12130C_A	544.546	1.97556	0.195382	10.1112	4.92525e-24	2.65257e-23	enriched	ZCF30	Dal81-independent	Stp2-independent
C2_04350C_A	908.776	1.97679	0.186504	10.5992	3.00618e-26	1.73245e-25	enriched	SUV3	Dal81-independent	Stp2-independent
CR_07050C_A	4825.06	1.98076	0.171652	11.5394	8.35076e-31	5.54716e-30	enriched	URA2	Dal81-dependent	Stp2-dependent
C1_13940W_A	18652.8	1.98223	0.113688	17.4356	4.42798e-68	8.03325e-67	enriched	SIM1	Dal81-dependent	Stp2-dependent
C4_02850W_A	1166.61	1.98283	0.149523	13.261	3.89857e-40	3.3492e-39	enriched	CAWG_03513	Dal81-dependent	Stp2-dependent
C7_01430C_A	1613.31	1.98383	0.226385	8.76306	1.90013e-18	8.06951e-18	enriched	orf19.6586	Dal81-dependent	Stp2-dependent
C2_01330C_A	265.91	1.99025	0.221023	9.0047	2.16252e-19	9.60496e-19	enriched	SIR2	Dal81-independent	Stp2-independent
CR_03370C_A	739.35	1.99307	0.161607	12.3328	6.03155e-35	4.45504e-34	enriched	KTI12	Dal81-dependent	Stp2-dependent
C5_00950C_A	1025.91	1.99623	0.153012	13.0462	6.67637e-39	5.52987e-38	enriched	CAWG_04488	Dal81-dependent	Stp2-dependent
C3_03710W_A	888.186	1.99649	0.165265	12.0805	1.33902e-33	9.53832e-33	enriched	CCC1	Dal81-dependent	Stp2-dependent
C2_09570C_A	197.356	2.00063	0.206852	9.67179	3.97358e-22	1.9802e-21	enriched	CAWG_06030	Dal81-independent	Stp2-independent
C5_03010W_A	496.443	2.00112	0.168708	11.8614	1.87739e-32	1.29732e-31	enriched	CAWG_04682	Dal81-dependent	Stp2-dependent
CR_05220C_A	520.855	2.00198	0.175936	11.379	5.31914e-30	3.44197e-29	enriched	GUT1	Dal81-independent	Stp2-independent
C2_02740C_A	1701.73	2.00226	0.1451	13.7991	2.57882e-43	2.43871e-42	enriched	HPT1	Dal81-dependent	Stp2-dependent
C6_00080C_A	716.821	2.00237	0.144303	13.8762	8.8317e-44	8.49909e-43	enriched	CAWG_05349	Dal81-independent	Stp2-dependent
C5_02220C_A	272.157	2.00298	0.188035	10.6522	1.70277e-26	9.86983e-26	enriched	CAWG_04605	Dal81-independent	Stp2-independent
C7_01390W_A	835.046	2.00768	0.158827	12.6407	1.26e-36	9.86476e-36	enriched	CAWG_05490	Dal81-dependent	Stp2-dependent
C3_00420W_A	1200.2	2.00969	0.138722	14.4872	1.46036e-47	1.54121e-46	enriched	CAWG_02377	Dal81-dependent	Stp2-dependent
CR_01410C_A	940.885	2.01069	0.149833	13.4195	4.64992e-41	4.10026e-40	enriched	CAWG_01493	Dal81-dependent	Stp2-dependent
C2_00030W_A	1314.17	2.01141	0.166378	12.0894	1.20172e-33	8.59089e-33	enriched	RRN3	Dal81-dependent	Stp2-dependent
C6_03840C_A	1030.88	2.01749	0.147798	13.6504	2.00868e-42	1.84718e-41	enriched	SNQ2	Dal81-independent	Stp2-dependent
CR_06110C_A	222.232	2.02432	0.282907	7.15541	8.34213e-13	2.66886e-12	enriched	RFX1	Dal81-independent	Stp2-independent
C1_05340C_A	603.924	2.02512	0.146804	13.7947	2.74275e-43	2.58559e-42	enriched	ZCF2	Dal81-independent	Stp2-independent
C5_00140C_A	567.977	2.02615	0.16768	12.0835	1.29164e-33	9.21178e-33	enriched	CAWG_04409	Dal81-dependent	Stp2-dependent
C3_06520C_A	159.806	2.02644	0.277827	7.29391	3.01094e-13	9.87564e-13	enriched	CAWG_02962	Dal81-independent	Stp2-independent
CR_08530C_A	10.7494	2.02703	0.823612	2.46115	0.0138491	0.0197164	enriched	tL(CAA)4	Dal81-independent	Stp2-independent
CR_06840W_A	730.29	2.02751	0.146273	13.8611	1.0897e-43	1.04033e-42	enriched	CAWG_01983	Dal81-dependent	Stp2-dependent
C6_02910W_A	345.714	2.02972	0.22239	9.12686	7.05172e-20	3.19108e-19	enriched	POP4	Dal81-dependent	Stp2-dependent
C1_09100W_A	73.8297	2.03229	0.306744	6.62536	3.46395e-11	1.01123e-10	enriched	ZCF28	Dal81-independent	Stp2-independent
C5_03800W_A	506.549	2.03825	0.157919	12.9069	4.11442e-38	3.34331e-37	enriched	CAWG_04752	Dal81-independent	Stp2-independent
C1_05910W_A	829.922	2.03941	0.153466	13.289	2.6806e-40	2.31946e-39	enriched	SIP5	Dal81-dependent	Stp2-dependent
C1_10140C_A	719.089	2.04036	0.169321	12.0503	1.93358e-33	1.37248e-32	enriched	CAWG_00419	Dal81-independent	Stp2-independent
CR_08100C_A	1402.81	2.04555	0.176499	11.5896	4.65348e-31	3.10491e-30	enriched	RIO2	Dal81-dependent	Stp2-dependent
C1_04250C_A	17.8682	2.04603	0.613173	3.33678	0.000847537	0.00139629	enriched	CAWG_00968	Dal81-independent	Stp2-independent
C1_12750C_A	330.044	2.04622	0.17896	11.4339	2.8303e-30	1.85952e-29	enriched	CAWG_00167	Dal81-dependent	Stp2-dependent
CR_07240C_A	3690.35	2.05418	0.151122	13.5929	4.41158e-42	4.01387e-41	enriched	CLG1	Dal81-dependent	Stp2-dependent
CR_00450C_A	15.2739	2.0543	0.649297	3.16388	0.00155681	0.00248639	enriched	snR35a	Dal81-independent	Stp2-independent
C5_02080C_A	541.467	2.05499	0.191803	10.7141	8.74372e-27	5.10263e-26	enriched	HSP12	Dal81-independent	Stp2-independent
C1_09490C_A	6310.76	2.05505	0.151938	13.5256	1.10475e-41	9.90149e-41	enriched	GUA1	Dal81-dependent	Stp2-dependent
C1_02170C_A	674.985	2.05756	0.163534	12.5818	2.65885e-36	2.06284e-35	enriched	GAL102	Dal81-dependent	Stp2-dependent
C1_08630W_A	651.447	2.05869	0.141469	14.5523	5.65037e-48	6.08073e-47	enriched	CAWG_00562	Dal81-independent	Stp2-independent
C2_05620W_A	263.811	2.06131	0.211328	9.75406	1.77233e-22	8.92106e-22	enriched	KTI11	Dal81-dependent	Stp2-dependent
C1_02840W_A	1921	2.06239	0.134841	15.2949	8.26265e-53	1.03069e-51	enriched	PDE2	Dal81-dependent	Stp2-dependent
C6_02900C_A	338.017	2.06272	0.210588	9.79506	1.18226e-22	5.9911e-22	enriched	CAWG_05085	Dal81-dependent	Stp2-dependent
C2_01060C_A	262.209	2.06319	0.187062	11.0294	2.75561e-28	1.69892e-27	enriched	CAWG_03883	Dal81-dependent	Stp2-dependent
C5_02180C_A	1561.52	2.06328	0.158069	13.0531	6.10521e-39	5.06378e-38	enriched	LEU3	Dal81-dependent	Stp2-dependent
C2_03390C_A	1474.01	2.06509	0.180799	11.422	3.24593e-30	2.12793e-29	enriched	HSP78	Dal81-dependent	Stp2-dependent
CR_04920W_A	674.471	2.06678	0.210555	9.81584	9.62313e-23	4.91385e-22	enriched	CAWG_01826	Dal81-independent	Stp2-independent
C3_05910W_A	431.33	2.06844	0.181767	11.3796	5.28278e-30	3.42213e-29	enriched	ZCF35	Dal81-independent	Stp2-independent
CR_00670C_A	316.845	2.07492	0.210793	9.8434	7.31928e-23	3.75982e-22	enriched	CAWG_01426	Dal81-dependent	Stp2-dependent
C1_08040W_A	188.472	2.07759	0.247323	8.40031	4.45284e-17	1.77082e-16	enriched	orf19.5076.1	Dal81-independent	Stp2-independent
C1_13220C_A	1872.36	2.08282	0.139912	14.8866	4.02837e-50	4.65199e-49	enriched	AKR1	Dal81-independent	Stp2-independent
C5_00290W_A	1046.35	2.09402	0.157989	13.2543	4.26275e-40	3.65683e-39	enriched	DUS4	Dal81-dependent	Stp2-dependent
C5_04970C_A	157.228	2.0956	0.241153	8.68994	3.62643e-18	1.51332e-17	enriched	PPR1	Dal81-independent	Stp2-independent
C2_04550C_A	2563.87	2.09756	0.178418	11.7564	6.54737e-32	4.46784e-31	enriched	NDH51	Dal81-independent	Stp2-independent
C5_02650C_A	2178.99	2.09785	0.126663	16.5625	1.30023e-61	2.01754e-60	enriched	IFH1	Dal81-dependent	Stp2-dependent
C3_06450W_A	143.98	2.09931	0.234476	8.95319	3.45341e-19	1.52371e-18	enriched	GLG2	Dal81-dependent	Stp2-dependent
C3_04220C_A	722.661	2.09973	0.163449	12.8464	9.01532e-38	7.25697e-37	enriched	URK1	Dal81-dependent	Stp2-dependent
C6_00950C_A	2004.1	2.10081	0.166403	12.6249	1.54005e-36	1.2026e-35	enriched	TOP1	Dal81-dependent	Stp2-dependent
C1_10040W_A	4316.31	2.10189	0.137582	15.2774	1.08199e-52	1.3452e-51	enriched	ERO1	Dal81-independent	Stp2-independent
C4_00750C_A	159.523	2.10202	0.286601	7.3343	2.2288e-13	7.38222e-13	enriched	CAWG_03706	Dal81-dependent	Stp2-dependent
C4_04140W_A	161.227	2.10247	0.282797	7.43455	1.04924e-13	3.52585e-13	enriched	CAWG_03402	Dal81-independent	Stp2-independent
CR_02370W_A	2117.02	2.10299	0.122919	17.1087	1.27739e-65	2.16078e-64	enriched	ERG25	Dal81-dependent	Stp2-independent
C3_06720W_A	1188.17	2.10359	0.133748	15.728	9.71825e-56	1.31142e-54	enriched	PRP5	Dal81-dependent	Stp2-dependent
C2_09460C_A	1101.19	2.10379	0.13562	15.5124	2.85979e-54	3.73327e-53	enriched	CAWG_06021	Dal81-dependent	Stp2-independent
C4_03820C_A	200.268	2.10451	0.226796	9.27928	1.70622e-20	7.96104e-20	enriched	HRQ2	Dal81-independent	Stp2-dependent
C3_04510W_A	760.081	2.10545	0.18814	11.1909	4.52029e-29	2.86938e-28	enriched	CAWG_02764	Dal81-dependent	Stp2-dependent
C4_00080C_A	602.394	2.10971	0.170418	12.3796	3.37036e-35	2.51104e-34	enriched	CAWG_03776	Dal81-independent	Stp2-independent
CR_05620C_A	552.252	2.1141	0.152497	13.8633	1.05741e-43	1.0111e-42	enriched	MTG2	Dal81-dependent	Stp2-dependent
C1_14020W_A	32.6813	2.12313	0.438899	4.83739	1.31555e-06	2.80535e-06	enriched	CAWG_00051	Dal81-dependent	Stp2-dependent
C3_03870C_A	4011.92	2.12794	0.160207	13.2825	2.92489e-40	2.51994e-39	enriched	SAP9	Dal81-dependent	Stp2-dependent
CR_09950C_A	6068.48	2.12798	0.158605	13.4168	4.81811e-41	4.23612e-40	enriched	SIK1	Dal81-dependent	Stp2-dependent
C2_00130W_A	37.6123	2.12909	0.443874	4.79661	1.61377e-06	3.41703e-06	enriched	CAWG_03793	Dal81-dependent	Stp2-dependent
C4_05900C_A	1431.57	2.12935	0.193369	11.0119	3.3497e-28	2.06096e-27	enriched	CAWG_03232	Dal81-dependent	Stp2-dependent
C7_01540W_A	28.8909	2.1349	0.542892	3.93245	8.40838e-05	0.000153379	enriched	ALK6	Dal81-dependent	Stp2-dependent
C7_03480W_A	1448.7	2.14045	0.138911	15.4088	1.42876e-53	1.82936e-52	enriched	orf19.6705	Dal81-independent	Stp2-independent
C3_00980W_A	2438.29	2.14169	0.122156	17.5325	8.09949e-69	1.5058e-67	enriched	FLC1	Dal81-independent	Stp2-independent
C5_01170W_A	148.81	2.14203	0.237613	9.01478	1.97274e-19	8.78157e-19	enriched	CAWG_04504	Dal81-independent	Stp2-independent
C3_04370C_A	1161.64	2.1511	0.161916	13.2853	2.81696e-40	2.43043e-39	enriched	CAWG_02749	Dal81-dependent	Stp2-dependent
C3_07980C_A	355.325	2.1522	0.244817	8.79107	1.48139e-18	6.33602e-18	enriched	orf19.6192	Dal81-dependent	Stp2-dependent
C5_01180W_A	1368.23	2.16215	0.14799	14.6101	2.42102e-48	2.64332e-47	enriched	PUS4	Dal81-dependent	Stp2-dependent
C6_04350C_A	1991.69	2.16571	0.148901	14.5446	6.31579e-48	6.77256e-47	enriched	FLO8	Dal81-independent	Stp2-dependent
CR_06220C_A	6.77182	2.17109	0.991966	2.18868	0.0286204	0.0391583	enriched	snR57b	Dal81-dependent	Stp2-dependent
C7_00330C_A	658.526	2.17749	0.189389	11.4974	1.35874e-30	8.97602e-30	enriched	CAWG_05390	Dal81-dependent	Stp2-dependent
C5_02280C_A	1078.24	2.17857	0.142217	15.3187	5.73548e-53	7.22045e-52	enriched	CAWG_04610	Dal81-dependent	Stp2-dependent
C4_04560C_A	1652.83	2.17877	0.158654	13.7329	6.45374e-43	6.00848e-42	enriched	CAWG_03355	Dal81-independent	Stp2-independent
C6_02150C_A	234.343	2.17997	0.222233	9.80943	1.0255e-22	5.21382e-22	enriched	CAWG_05152	Dal81-independent	Stp2-independent
C5_02510C_A	475.562	2.1814	0.21353	10.2159	1.68348e-24	9.21538e-24	enriched	CAWG_04633	Dal81-independent	Stp2-independent
C3_01290W_A	423.292	2.18514	0.169677	12.8783	5.96722e-38	4.82276e-37	enriched	CAWG_02462	Dal81-dependent	Stp2-dependent
C3_02390W_A	520.543	2.18629	0.183898	11.8886	1.35687e-32	9.44146e-32	enriched	CAWG_02563	Dal81-dependent	Stp2-dependent
C1_00540C_A	968.761	2.18996	0.131902	16.6029	6.639e-62	1.03821e-60	enriched	CAWG_01319	Dal81-independent	Stp2-independent
C7_01210C_A	916.844	2.1935	0.141576	15.4934	3.8424e-54	4.9835e-53	enriched	CAWG_05474	Dal81-dependent	Stp2-dependent
CR_06450W_A	474.237	2.19442	0.173152	12.6734	8.30622e-37	6.52011e-36	enriched	CAWG_01949	Dal81-dependent	Stp2-dependent
CR_07730W_A	500.454	2.19624	0.173104	12.6873	6.95011e-37	5.46991e-36	enriched	HGT14	Dal81-dependent	Stp2-dependent
C5_04990W_A	275.016	2.19826	0.208015	10.5678	4.20256e-26	2.40742e-25	enriched	CAWG_04865	Dal81-dependent	Stp2-dependent
C4_01080W_A	1342.02	2.1983	0.140348	15.6631	2.70188e-55	3.59752e-54	enriched	RAT1	Dal81-dependent	Stp2-dependent
C6_03220W_A	233.011	2.20148	0.217034	10.1435	3.54228e-24	1.92154e-23	enriched	CAWG_05048	Dal81-dependent	Stp2-dependent
C4_00760W_A	1408.35	2.20652	0.160084	13.7835	3.20317e-43	3.01018e-42	enriched	ZCF21	Dal81-independent	Stp2-independent
C3_06770W_A	151.037	2.20661	0.230797	9.56084	1.16808e-21	5.73066e-21	enriched	SLU7	Dal81-independent	Stp2-independent
C5_04120C_A	453.917	2.21283	0.161223	13.7253	7.16683e-43	6.66204e-42	enriched	CAWG_04785	Dal81-dependent	Stp2-dependent
CR_03980W_A	536.655	2.21703	0.159564	13.8943	6.86359e-44	6.61571e-43	enriched	CAWG_01735	Dal81-independent	Stp2-dependent
C3_01110C_A	65.7882	2.21739	0.367198	6.03867	1.55385e-09	4.10871e-09	enriched	CAWG_02445	Dal81-dependent	Stp2-independent
C1_10250C_A	165.106	2.21884	0.272181	8.15207	3.5775e-16	1.3614e-15	enriched	CAWG_00408	Dal81-dependent	Stp2-dependent
CR_06590C_A	394.696	2.221	0.164127	13.5322	1.00937e-41	9.06021e-41	enriched	RGS2	Dal81-dependent	Stp2-dependent
C7_01900W_A	2604.4	2.22184	0.167841	13.2378	5.30579e-40	4.53864e-39	enriched	NUC2	Dal81-independent	Stp2-independent
C3_05800W_A	514.775	2.22309	0.168593	13.1862	1.05424e-39	8.94169e-39	enriched	CAWG_02890	Dal81-dependent	Stp2-dependent
C1_01030W_A	2585.87	2.2254	0.188167	11.8267	2.84037e-32	1.95153e-31	enriched	HMT1	Dal81-dependent	Stp2-dependent
C2_09110C_A	19.7291	2.22574	0.649432	3.42721	0.000609814	0.00101749	enriched	orf19.4069	Dal81-independent	Stp2-independent
C5_03020W_A	1279.69	2.2296	0.130546	17.0791	2.12447e-65	3.56353e-64	enriched	CCC2	Dal81-dependent	Stp2-dependent
C1_10620W_A	4127.05	2.2303	0.179341	12.436	1.66546e-35	1.25014e-34	enriched	CAWG_00372	Dal81-dependent	Stp2-dependent
C7_02430C_A	24.2076	2.23571	0.645219	3.46504	0.00053015	0.000891501	enriched	CAWG_00654	Dal81-dependent	Stp2-dependent
C2_02450C_A	2889.02	2.23582	0.13328	16.7753	3.69845e-63	5.9067e-62	enriched	UTP22	Dal81-dependent	Stp2-dependent
C1_12680W_A	2087.71	2.23651	0.174901	12.7873	1.93173e-37	1.53643e-36	enriched	CAWG_00174	Dal81-dependent	Stp2-dependent
C1_11070W_A	780.259	2.23717	0.142541	15.6949	1.63879e-55	2.20154e-54	enriched	PET127	Dal81-dependent	Stp2-independent
C1_08310W_A	1885.76	2.23815	0.149555	14.9654	1.23548e-50	1.43502e-49	enriched	OPY2	Dal81-dependent	Stp2-dependent
C5_02110W_A	615.678	2.23935	0.202404	11.0637	1.88102e-28	1.16569e-27	enriched	CAWG_04595	Dal81-independent	Stp2-independent
C1_13880C_A	1343.86	2.24225	0.138141	16.2316	3.01729e-59	4.41923e-58	enriched	CAWG_00064	Dal81-independent	Stp2-independent
C7_01750W_A	144.835	2.24398	0.257021	8.73072	2.53054e-18	1.06563e-17	enriched	CAWG_05526	Dal81-independent	Stp2-independent
C4_06530C_A	235.205	2.24446	0.243517	9.21686	3.05929e-20	1.41207e-19	enriched	XUT1	Dal81-dependent	Stp2-dependent
C7_01380W_A	140.249	2.24714	0.251327	8.9411	3.85316e-19	1.69387e-18	enriched	CAWG_05489	Dal81-independent	Stp2-independent
CR_08890C_A	1327.56	2.24884	0.171482	13.1142	2.73163e-39	2.2846e-38	enriched	ASR2	Dal81-independent	Stp2-independent
C4_05110C_A	1258.6	2.25075	0.15176	14.831	9.23781e-50	1.05663e-48	enriched	HAP41	Dal81-independent	Stp2-independent
CR_03500W_A	1838.73	2.25938	0.17265	13.0865	3.93447e-39	3.27691e-38	enriched	CIT1	Dal81-independent	Stp2-independent
CR_06680C_A	1135.75	2.2643	0.171696	13.1879	1.03056e-39	8.7532e-39	enriched	CAWG_01967	Dal81-dependent	Stp2-dependent
C2_08670C_A	1293.83	2.2664	0.131006	17.3	4.70446e-67	8.33341e-66	enriched	UTP15	Dal81-dependent	Stp2-dependent
CR_05990C_A	2481.28	2.26989	0.201656	11.2562	2.15812e-29	1.38605e-28	enriched	SFL1	Dal81-dependent	Stp2-dependent
C3_07650C_A	349.727	2.27591	0.192621	11.8155	3.2467e-32	2.22562e-31	enriched	CAWG_03071	Dal81-dependent	Stp2-dependent
C6_00070C_A	1385.75	2.27727	0.151544	15.0271	4.87931e-51	5.79057e-50	enriched	PGA25	Dal81-dependent	Stp2-dependent
C4_02800W_A	718.487	2.28682	0.157811	14.4908	1.38452e-47	1.46374e-46	enriched	RPC53	Dal81-dependent	Stp2-dependent
C1_06540C_A	576.302	2.28733	0.166717	13.7198	7.72583e-43	7.14847e-42	enriched	CAWG_00758	Dal81-dependent	Stp2-dependent
C3_01460C_A	685.729	2.29202	0.158113	14.4962	1.28123e-47	1.35932e-46	enriched	FOX3	Dal81-dependent	Stp2-independent
CR_07030C_A	326.253	2.29252	0.189502	12.0976	1.08729e-33	7.80072e-33	enriched	CAWG_02000	Dal81-dependent	Stp2-dependent
CR_06000W_A	4318.56	2.29549	0.151799	15.1219	1.16064e-51	1.40518e-50	enriched	SOK1	Dal81-dependent	Stp2-independent
C1_03350C_A	3653.99	2.29584	0.179956	12.7578	2.82233e-37	2.2359e-36	enriched	RLI1	Dal81-dependent	Stp2-dependent
C5_04470C_A	1968.25	2.29589	0.140832	16.3023	9.50334e-60	1.4056e-58	enriched	CAWG_04817	Dal81-dependent	Stp2-dependent
C2_02920W_A	2749.8	2.29599	0.152426	15.063	2.83812e-51	3.40859e-50	enriched	CAWG_04059	Dal81-independent	Stp2-independent
C4_03740W_A	566.585	2.29727	0.150569	15.2573	1.47304e-52	1.82761e-51	enriched	CAWG_03439	Dal81-dependent	Stp2-dependent
C1_10260C_A	713.557	2.30221	0.244509	9.41563	4.70265e-21	2.25554e-20	enriched	RPA34	Dal81-dependent	Stp2-dependent
C5_01390C_A	243.55	2.30331	0.210432	10.9456	6.97307e-28	4.24248e-27	enriched	SNM1	Dal81-dependent	Stp2-dependent
C5_04030W_A	1315.01	2.30399	0.121126	19.0214	1.1346e-80	2.7584e-79	enriched	CAWG_04775	Dal81-dependent	Stp2-dependent
CR_01000C_A	1542.8	2.3047	0.133668	17.242	1.28548e-66	2.25712e-65	enriched	SLN1	Dal81-independent	Stp2-independent
C3_01960C_A	1845.31	2.31202	0.142773	16.1937	5.58749e-59	8.16372e-58	enriched	POX1-3	Dal81-dependent	Stp2-dependent
C7_03530C_A	262.64	2.32182	0.191763	12.1077	9.61114e-34	6.9037e-33	enriched	ISY1	Dal81-dependent	Stp2-dependent
C5_01430C_A	582.325	2.32567	0.204082	11.3958	4.38947e-30	2.86197e-29	enriched	CAWG_04530	Dal81-dependent	Stp2-dependent
C6_01500C_A	126.572	2.33569	0.252831	9.23814	2.50809e-20	1.16123e-19	enriched	TRY5	Dal81-dependent	Stp2-dependent
C1_01380C_A	813.732	2.33574	0.2478	9.42591	4.26409e-21	2.04683e-20	enriched	TRM2	Dal81-dependent	Stp2-dependent
C5_03670C_A	550.39	2.33886	0.160453	14.5766	3.95892e-48	4.29897e-47	enriched	CAWG_04739	Dal81-dependent	Stp2-dependent
C3_04250W_A	773.888	2.34143	0.440556	5.31472	1.06821e-07	2.49984e-07	enriched	WSC1	Dal81-independent	Stp2-dependent
C1_11950W_A	96.882	2.34248	0.304176	7.70106	1.34939e-14	4.73866e-14	enriched	CAWG_00246	Dal81-dependent	Stp2-dependent
C3_01340W_A	74.0309	2.34251	0.335267	6.98701	2.80803e-12	8.6874e-12	enriched	CAWG_02467	Dal81-independent	Stp2-independent
C4_05130C_A	401.276	2.3441	0.213973	10.9551	6.27934e-28	3.83206e-27	enriched	ALD6	Dal81-dependent	Stp2-dependent
C6_03110C_A	239.755	2.346	0.202493	11.5856	4.8766e-31	3.25016e-30	enriched	CAWG_05058	Dal81-dependent	Stp2-dependent
C1_02800W_A	37.1241	2.34778	0.471876	4.97541	6.51095e-07	1.43322e-06	enriched	CAWG_01104	Dal81-dependent	Stp2-dependent
C6_00370C_A	6134.86	2.35108	0.161539	14.5543	5.48743e-48	5.92662e-47	enriched	NOP5	Dal81-dependent	Stp2-dependent
C3_07800C_A	764.367	2.35175	0.160363	14.6651	1.07781e-48	1.18756e-47	enriched	CAWG_03086	Dal81-dependent	Stp2-dependent
C2_06470W_A	1132.55	2.35574	0.181901	12.9507	2.32882e-38	1.91308e-37	enriched	RTA2	Dal81-independent	Stp2-independent
C1_01160C_A	686.474	2.35613	0.165927	14.1998	9.18522e-46	9.27012e-45	enriched	CAWG_01259	Dal81-dependent	Stp2-dependent
C7_01700W_A	1531.56	2.35685	0.148921	15.8262	2.05377e-56	2.81573e-55	enriched	CAWG_05521	Dal81-dependent	Stp2-dependent
C4_04470W_A	1203.16	2.35751	0.145093	16.2482	2.29836e-59	3.38276e-58	enriched	SAP10	Dal81-dependent	Stp2-dependent
C2_05270W_A	1639.61	2.35853	0.166254	14.1863	1.11375e-45	1.1184e-44	enriched	CAWG_04278	Dal81-dependent	Stp2-dependent
C2_06520C_A	395.782	2.36082	0.188309	12.5369	4.69006e-36	3.59232e-35	enriched	CAWG_04391	Dal81-dependent	Stp2-dependent
[truncated: 517 more rows]
