# Supplementary material for: Coordinated regulation of pH alkalinization by two transcription factors promotes fungal commensalism and pathogenicity
Source: Nat Commun. 2025 Aug 22;16:7855. doi: 10.1038/s41467-025-62953-x (PMC12373999; doi:10.1038/s41467-025-62953-x)
Supplement: Supplementary file 4 — Supplementary Data 2 [file 41467_2025_62953_MOESM4_ESM.xlsx]

## Sheet: allGroups_GO_detail
category	ID	Description	GeneRatio	BgRatio	RichFactor	FoldEnrichment	zScore	pvalue	p.adjust	qvalue	geneID	Count
Alkalinization-responsive genes	GO:0008652	amino acid biosynthetic process	81/2381	114/5910	0.710526	1.76363	6.76214	1.89354e-11	1.98348e-09	1.81256e-09	C1_00170W_A/C1_01870C_A/C1_02590C_A/C1_02620C_A/C1_02820W_A/C1_02970W_A/C1_05020C_A/C1_05110C_A/C1_06550W_A/C1_06900C_A/C1_08410C_A/C1_09180W_A/C1_09290C_A/C1_10450W_A/C1_12210W_A/C2_00340C_A/C2_00390C_A/C2_00960C_A/C2_02030W_A/C2_02370C_A/C2_02510W_A/C2_04230W_A/C2_04460W_A/C2_04810W_A/C2_05890C_A/C2_06190W_A/C2_06210C_A/C2_08530C_A/C2_09060C_A/C2_09750W_A/C3_02320W_A/C3_02950C_A/C3_03480C_A/C3_…	81
Alkalinization-responsive genes	GO:1901607	alpha-amino acid biosynthetic process	73/2381	104/5910	0.701923	1.74228	6.27272	4.73079e-10	4.17306e-08	3.81346e-08	C1_00170W_A/C1_01870C_A/C1_02590C_A/C1_02620C_A/C1_02820W_A/C1_05020C_A/C1_06550W_A/C1_06900C_A/C1_08410C_A/C1_09180W_A/C1_09290C_A/C1_10450W_A/C1_12210W_A/C2_00340C_A/C2_00390C_A/C2_00960C_A/C2_02370C_A/C2_02510W_A/C2_04230W_A/C2_04460W_A/C2_04810W_A/C2_05890C_A/C2_06190W_A/C2_06210C_A/C2_08530C_A/C2_09060C_A/C2_09750W_A/C3_02950C_A/C3_03480C_A/C3_04660C_A/C3_05590C_A/C3_06590W_A/C3_07220C_A/C4_…	73
Alkalinization-responsive genes	GO:1901605	alpha-amino acid metabolic process	97/2381	150/5910	0.646667	1.60512	6.1658	9.11314e-10	7.45088e-08	6.80883e-08	C1_00170W_A/C1_00410C_A/C1_01870C_A/C1_02590C_A/C1_02620C_A/C1_02820W_A/C1_03760C_A/C1_05020C_A/C1_06550W_A/C1_06900C_A/C1_08330C_A/C1_08400C_A/C1_08410C_A/C1_08490W_A/C1_09180W_A/C1_09290C_A/C1_10450W_A/C1_10700C_A/C1_11450C_A/C1_12210W_A/C2_00340C_A/C2_00390C_A/C2_00960C_A/C2_02370C_A/C2_02510W_A/C2_02950W_A/C2_04230W_A/C2_04460W_A/C2_04810W_A/C2_05250C_A/C2_05890C_A/C2_06190W_A/C2_06210C_A/C2_…	97
Alkalinization-responsive genes	GO:0016053	organic acid biosynthetic process	127/2381	209/5910	0.607656	1.50829	6.145	9.78039e-10	7.45088e-08	6.80883e-08	C1_00060W_A/C1_00170W_A/C1_01870C_A/C1_02020W_A/C1_02590C_A/C1_02620C_A/C1_02820W_A/C1_02970W_A/C1_03390W_A/C1_04320W_A/C1_05020C_A/C1_05110C_A/C1_05990C_A/C1_06550W_A/C1_06900C_A/C1_08410C_A/C1_08500C_A/C1_09180W_A/C1_09290C_A/C1_09380W_A/C1_10450W_A/C1_11080W_A/C1_12210W_A/C1_12790C_A/C1_13330C_A/C1_13860C_A/C1_13880C_A/C2_00340C_A/C2_00390C_A/C2_00960C_A/C2_02030W_A/C2_02370C_A/C2_02510W_A/C2_…	127
Alkalinization-responsive genes	GO:0046394	carboxylic acid biosynthetic process	127/2381	209/5910	0.607656	1.50829	6.145	9.78039e-10	7.45088e-08	6.80883e-08	C1_00060W_A/C1_00170W_A/C1_01870C_A/C1_02020W_A/C1_02590C_A/C1_02620C_A/C1_02820W_A/C1_02970W_A/C1_03390W_A/C1_04320W_A/C1_05020C_A/C1_05110C_A/C1_05990C_A/C1_06550W_A/C1_06900C_A/C1_08410C_A/C1_08500C_A/C1_09180W_A/C1_09290C_A/C1_09380W_A/C1_10450W_A/C1_11080W_A/C1_12210W_A/C1_12790C_A/C1_13330C_A/C1_13860C_A/C1_13880C_A/C2_00340C_A/C2_00390C_A/C2_00960C_A/C2_02030W_A/C2_02370C_A/C2_02510W_A/C2_…	127
Alkalinization-responsive genes	GO:0044283	small molecule biosynthetic process	182/2381	335/5910	0.543284	1.34851	5.39421	6.433e-08	4.49238e-06	4.10527e-06	C1_00060W_A/C1_00170W_A/C1_00410C_A/C1_01330C_A/C1_01450W_A/C1_01650W_A/C1_01870C_A/C1_02020W_A/C1_02480W_A/C1_02590C_A/C1_02600W_A/C1_02620C_A/C1_02820W_A/C1_02970W_A/C1_03390W_A/C1_03550C_A/C1_04320W_A/C1_05020C_A/C1_05110C_A/C1_05560W_A/C1_05990C_A/C1_06550W_A/C1_06900C_A/C1_08330C_A/C1_08410C_A/C1_08460C_A/C1_08500C_A/C1_08590C_A/C1_09180W_A/C1_09290C_A/C1_09380W_A/C1_09490C_A/C1_09720W_A/C1_…	182
Alkalinization-responsive genes	GO:0006082	organic acid metabolic process	218/2381	421/5910	0.517815	1.28529	4.98882	5.00116e-07	3.10443e-05	2.83692e-05	C1_00060W_A/C1_00170W_A/C1_00410C_A/C1_00500C_A/C1_01690C_A/C1_01740W_A/C1_01870C_A/C1_02020W_A/C1_02050C_A/C1_02590C_A/C1_02620C_A/C1_02820W_A/C1_02970W_A/C1_02980W_A/C1_03320C_A/C1_03390W_A/C1_03760C_A/C1_04290C_A/C1_04320W_A/C1_04500W_A/C1_05020C_A/C1_05110C_A/C1_05940W_A/C1_05990C_A/C1_06550W_A/C1_06900C_A/C1_07420C_A/C1_08190C_A/C1_08330C_A/C1_08400C_A/C1_08410C_A/C1_08490W_A/C1_08500C_A/C1_…	218
Alkalinization-responsive genes	GO:0043436	oxoacid metabolic process	217/2381	420/5910	0.516667	1.28244	4.93267	6.61698e-07	3.96073e-05	3.61944e-05	C1_00060W_A/C1_00170W_A/C1_00410C_A/C1_00500C_A/C1_01690C_A/C1_01740W_A/C1_01870C_A/C1_02020W_A/C1_02050C_A/C1_02590C_A/C1_02620C_A/C1_02820W_A/C1_02970W_A/C1_02980W_A/C1_03320C_A/C1_03390W_A/C1_03760C_A/C1_04290C_A/C1_04320W_A/C1_04500W_A/C1_05020C_A/C1_05110C_A/C1_05940W_A/C1_05990C_A/C1_06550W_A/C1_06900C_A/C1_07420C_A/C1_08190C_A/C1_08330C_A/C1_08400C_A/C1_08410C_A/C1_08490W_A/C1_08500C_A/C1_…	217
Alkalinization-responsive genes	GO:0019752	carboxylic acid metabolic process	211/2381	408/5910	0.517157	1.28366	4.87731	8.74363e-07	4.88477e-05	4.46385e-05	C1_00060W_A/C1_00170W_A/C1_00410C_A/C1_00500C_A/C1_01690C_A/C1_01740W_A/C1_01870C_A/C1_02020W_A/C1_02590C_A/C1_02620C_A/C1_02820W_A/C1_02970W_A/C1_02980W_A/C1_03320C_A/C1_03390W_A/C1_03760C_A/C1_04290C_A/C1_04320W_A/C1_04500W_A/C1_05020C_A/C1_05110C_A/C1_05990C_A/C1_06550W_A/C1_06900C_A/C1_07420C_A/C1_08190C_A/C1_08330C_A/C1_08400C_A/C1_08410C_A/C1_08490W_A/C1_08500C_A/C1_08590C_A/C1_09180W_A/C1_…	211
Alkalinization-responsive genes	GO:0072524	pyridine-containing compound metabolic process	49/2381	74/5910	0.662162	1.64359	4.57589	5.20013e-06	0.000249012	0.000227554	C1_01650W_A/C1_02590C_A/C1_02600W_A/C1_04320W_A/C1_08320W_A/C1_08330C_A/C1_08490W_A/C1_08500C_A/C1_08780W_A/C1_08980C_A/C1_11080W_A/C1_13860C_A/C2_01530C_A/C2_02510W_A/C2_02950W_A/C2_03270W_A/C2_04340C_A/C2_05460W_A/C2_05890C_A/C2_08100W_A/C3_00260C_A/C3_03180C_A/C3_06870W_A/C3_07440W_A/C4_01750C_A/C4_06570C_A/C4_06760W_A/C4_07110C_A/C5_00800C_A/C5_04810W_A/C5_05050W_A/C6_00750C_A/C6_01750C_A/C6_…	49
Alkalinization-responsive genes	GO:0072525	pyridine-containing compound biosynthetic process	34/2381	49/5910	0.693878	1.72231	4.17009	3.35547e-05	0.00144199	0.00131774	C1_01650W_A/C1_02590C_A/C1_02600W_A/C1_04320W_A/C1_08490W_A/C1_08500C_A/C1_11080W_A/C1_13860C_A/C2_01530C_A/C2_02510W_A/C2_02950W_A/C2_03270W_A/C2_04340C_A/C2_05460W_A/C3_00260C_A/C3_03180C_A/C3_06870W_A/C3_07440W_A/C4_01750C_A/C4_07110C_A/C5_00800C_A/C5_04810W_A/C6_00750C_A/C6_01750C_A/C7_01800C_A/CR_00350W_A/CR_04230W_A/CR_04510W_A/CR_04590C_A/CR_05440W_A/CR_06340C_A/CR_07150W_A/CR_07490C_A/CR_…	34
Alkalinization-responsive genes	GO:0006520	amino acid metabolic process	114/2381	213/5910	0.535211	1.32847	4.01033	4.8242e-05	0.00192508	0.0017592	C1_00170W_A/C1_00410C_A/C1_01870C_A/C1_02590C_A/C1_02620C_A/C1_02820W_A/C1_02970W_A/C1_03760C_A/C1_05020C_A/C1_05110C_A/C1_06550W_A/C1_06900C_A/C1_08330C_A/C1_08400C_A/C1_08410C_A/C1_08490W_A/C1_09180W_A/C1_09290C_A/C1_10450W_A/C1_10700C_A/C1_11450C_A/C1_12210W_A/C1_13030C_A/C2_00340C_A/C2_00390C_A/C2_00960C_A/C2_02030W_A/C2_02370C_A/C2_02510W_A/C2_02950W_A/C2_04230W_A/C2_04460W_A/C2_04810W_A/C2_…	114
Alkalinization-responsive genes	GO:1901657	glycosyl compound metabolic process	27/2381	37/5910	0.72973	1.8113	4.06596	5.4328e-05	0.00211753	0.00193506	C1_01150C_A/C1_01650W_A/C1_08410C_A/C1_09490C_A/C1_09720W_A/C2_02510W_A/C2_02740C_A/C2_03010C_A/C2_03160C_A/C2_06830C_A/C2_07890W_A/C3_01350C_A/C3_03180C_A/C3_06340W_A/C3_07490W_A/C4_01820C_A/C4_06860C_A/C5_00680W_A/C5_02890W_A/C5_03790W_A/C5_04570C_A/C5_05360C_A/C6_00620W_A/C6_02290C_A/C7_01570C_A/CR_04230W_A/CR_07050C_A	27
Alkalinization-responsive genes	GO:0009082	branched-chain amino acid biosynthetic process	13/2381	14/5910	0.928571	2.30485	4.01475	6.3416e-05	0.00216144	0.00197519	C1_00170W_A/C1_06900C_A/C2_02370C_A/C2_04230W_A/C2_06190W_A/C2_09750W_A/C3_02320W_A/C3_05590C_A/C4_01370W_A/C5_02180C_A/C5_05410C_A/C6_00870C_A/C7_00400W_A	13
Alkalinization-responsive genes	GO:0044282	small molecule catabolic process	82/2381	146/5910	0.561644	1.39408	3.96018	6.35551e-05	0.00216144	0.00197519	C1_00500C_A/C1_01740W_A/C1_02130C_A/C1_02150W_A/C1_02180W_A/C1_02980W_A/C1_03320C_A/C1_03390W_A/C1_04290C_A/C1_04500W_A/C1_08190C_A/C1_08330C_A/C1_08400C_A/C1_08490W_A/C1_09190C_A/C1_09690W_A/C1_10450W_A/C1_13860C_A/C2_00340C_A/C2_04230W_A/C2_04340C_A/C2_05250C_A/C2_05460W_A/C2_05950C_A/C2_05960C_A/C2_05970C_A/C2_05990C_A/C2_06190W_A/C2_06830C_A/C2_07260C_A/C2_07900W_A/C2_08970C_A/C3_00810C_A/C3_…	82
Alkalinization-responsive genes	GO:0009066	aspartate family amino acid metabolic process	34/2381	50/5910	0.68	1.68786	4.01189	6.44821e-05	0.00216144	0.00197519	C1_01870C_A/C1_02820W_A/C1_08330C_A/C1_08410C_A/C1_09180W_A/C1_10450W_A/C1_10700C_A/C1_11450C_A/C2_00340C_A/C2_00390C_A/C2_00960C_A/C2_02370C_A/C2_04460W_A/C2_05250C_A/C2_06190W_A/C2_08530C_A/C2_09060C_A/C3_02950C_A/C3_06280W_A/C3_06590W_A/C4_04410C_A/C4_05320W_A/C4_05540W_A/C4_05560C_A/C4_06580W_A/C5_00650C_A/C5_02270W_A/CR_01400W_A/CR_01620C_A/CR_02170W_A/CR_04890W_A/CR_06860C_A/CR_08340W_A/CR_…	34
Alkalinization-responsive genes	GO:0009084	glutamine family amino acid biosynthetic process	18/2381	22/5910	0.818182	2.03085	3.97863	8.18231e-05	0.0025637	0.00234278	C1_05020C_A/C1_06550W_A/C1_09290C_A/C2_05890C_A/C3_04660C_A/C3_07220C_A/C4_00240C_A/C4_01550C_A/C4_05070C_A/C4_06120W_A/C5_02600W_A/C5_04880C_A/C7_00890C_A/C7_02150C_A/C7_03570W_A/CR_01030W_A/CR_05050W_A/CR_10580W_A	18
Alkalinization-responsive genes	GO:0006553	lysine metabolic process	12/2381	13/5910	0.923077	2.29122	3.82795	0.000147101	0.00404165	0.00369338	C1_02820W_A/C1_09180W_A/C2_00340C_A/C2_02370C_A/C2_04460W_A/C3_06590W_A/C4_04410C_A/C4_05320W_A/C4_05540W_A/C4_05560C_A/CR_01400W_A/CR_04890W_A	12
Alkalinization-responsive genes	GO:0009085	lysine biosynthetic process	12/2381	13/5910	0.923077	2.29122	3.82795	0.000147101	0.00404165	0.00369338	C1_02820W_A/C1_09180W_A/C2_00340C_A/C2_02370C_A/C2_04460W_A/C3_06590W_A/C4_04410C_A/C4_05320W_A/C4_05540W_A/C4_05560C_A/CR_01400W_A/CR_04890W_A	12
Alkalinization-responsive genes	GO:0006096	glycolytic process	18/2381	23/5910	0.782609	1.94255	3.71992	0.000234348	0.00613699	0.00560816	C1_04320W_A/C1_08500C_A/C1_11080W_A/C1_13860C_A/C2_03270W_A/C2_04340C_A/C2_05460W_A/C3_06870W_A/C3_07440W_A/C4_01750C_A/C4_07110C_A/C5_04810W_A/C6_00750C_A/C7_01800C_A/CR_04510W_A/CR_06340C_A/CR_07150W_A/CR_07490C_A	18
Alkalinization-responsive genes	GO:0042866	pyruvate biosynthetic process	18/2381	23/5910	0.782609	1.94255	3.71992	0.000234348	0.00613699	0.00560816	C1_04320W_A/C1_08500C_A/C1_11080W_A/C1_13860C_A/C2_03270W_A/C2_04340C_A/C2_05460W_A/C3_06870W_A/C3_07440W_A/C4_01750C_A/C4_07110C_A/C5_04810W_A/C6_00750C_A/C7_01800C_A/CR_04510W_A/CR_06340C_A/CR_07150W_A/CR_07490C_A	18
Alkalinization-responsive genes	GO:0009064	glutamine family amino acid metabolic process	24/2381	34/5910	0.705882	1.75211	3.61234	0.000328314	0.00821274	0.00750505	C1_05020C_A/C1_06550W_A/C1_09290C_A/C1_10700C_A/C2_05890C_A/C2_07900W_A/C3_03470W_A/C3_04660C_A/C3_07220C_A/C4_00160C_A/C4_00240C_A/C4_01550C_A/C4_05070C_A/C4_06120W_A/C5_02600W_A/C5_04490C_A/C5_04880C_A/C7_00890C_A/C7_02150C_A/C7_03570W_A/CR_01030W_A/CR_05050W_A/CR_07050C_A/CR_10580W_A	24
Alkalinization-responsive genes	GO:0009067	aspartate family amino acid biosynthetic process	26/2381	38/5910	0.684211	1.69831	3.54699	0.00040689	0.00974211	0.00890263	C1_01870C_A/C1_02820W_A/C1_08410C_A/C1_09180W_A/C2_00340C_A/C2_00390C_A/C2_00960C_A/C2_02370C_A/C2_04460W_A/C2_08530C_A/C2_09060C_A/C3_02950C_A/C3_06590W_A/C4_04410C_A/C4_05320W_A/C4_05540W_A/C4_05560C_A/C4_06580W_A/C5_00650C_A/C5_02270W_A/CR_01400W_A/CR_01620C_A/CR_02170W_A/CR_04890W_A/CR_08340W_A/CR_10350C_A	26
Alkalinization-responsive genes	GO:0009072	aromatic amino acid metabolic process	26/2381	38/5910	0.684211	1.69831	3.54699	0.00040689	0.00974211	0.00890263	C1_00410C_A/C1_05110C_A/C1_08490W_A/C1_12210W_A/C2_00340C_A/C2_02030W_A/C2_02510W_A/C2_02950W_A/C2_04810W_A/C3_00260C_A/C4_00140C_A/C4_00650W_A/C4_00890W_A/C4_05560C_A/C4_06110C_A/C4_06570C_A/C4_07090C_A/C5_00800C_A/C5_05080W_A/C5_05320C_A/C6_00210W_A/C7_03720C_A/CR_01590C_A/CR_05440W_A/CR_06860C_A/CR_07710W_A	26
Alkalinization-responsive genes	GO:0031109	microtubule polymerization or depolymerization	17/2381	22/5910	0.772727	1.91803	3.54318	0.000461716	0.0104572	0.00955614	C1_00710C_A/C1_02380C_A/C1_09730W_A/C1_13710C_A/C2_05210W_A/C2_10310C_A/C3_05210C_A/C3_05720C_A/C3_07770C_A/C4_05570C_A/CR_00320C_A/CR_01070W_A/CR_06160C_A/CR_06540W_A/CR_08010W_A/CR_09120C_A/CR_09520C_A	17
Alkalinization-responsive genes	GO:0098656	monoatomic anion transmembrane transport	55/2381	96/5910	0.572917	1.42207	3.42443	0.000513739	0.0113293	0.010353	C1_02050C_A/C1_02530C_A/C1_05940W_A/C1_06000W_A/C1_07120W_A/C1_10160W_A/C1_10710C_A/C1_10800C_A/C1_11480W_A/C1_11870W_A/C1_12100C_A/C1_13400C_A/C2_04060C_A/C2_06520C_A/C2_06590C_A/C2_06680W_A/C2_09610W_A/C2_09700W_A/C3_00920W_A/C3_02620C_A/C3_03070W_A/C3_03230C_A/C3_03690W_A/C3_04270C_A/C3_04660C_A/C3_05460W_A/C3_05580C_A/C3_05600W_A/C3_06580W_A/C3_06710W_A/C4_01100C_A/C4_01750C_A/C4_04030W_A/C4_…	55
Alkalinization-responsive genes	GO:0006090	pyruvate metabolic process	24/2381	35/5910	0.685714	1.70205	3.42142	0.000647373	0.0137731	0.0125863	C1_04320W_A/C1_08330C_A/C1_08500C_A/C1_11080W_A/C1_13860C_A/C2_03270W_A/C2_04340C_A/C2_05460W_A/C3_06870W_A/C3_07440W_A/C4_01750C_A/C4_03940C_A/C4_04150C_A/C4_06570C_A/C4_07110C_A/C5_04810W_A/C6_00750C_A/C6_01670W_A/C7_01800C_A/CR_04510W_A/CR_06340C_A/CR_06860C_A/CR_07150W_A/CR_07490C_A	24
Alkalinization-responsive genes	GO:0051701	biological process involved in interaction with host	12/2381	14/5910	0.857143	2.12756	3.46924	0.000649209	0.0137731	0.0125863	C1_06810W_A/C1_08500C_A/C1_13630W_A/C2_00660C_A/C2_03270W_A/C3_06180C_A/C3_06870W_A/C4_01750C_A/C4_06980W_A/C5_05050W_A/C6_00750C_A/C6_03500C_A	12
Alkalinization-responsive genes	GO:0046785	microtubule polymerization	15/2381	19/5910	0.789474	1.95959	3.44096	0.00068881	0.0142524	0.0130243	C1_02380C_A/C1_09730W_A/C1_13710C_A/C2_05210W_A/C2_10310C_A/C3_05210C_A/C3_05720C_A/C3_07770C_A/C4_05570C_A/CR_00320C_A/CR_01070W_A/CR_06160C_A/CR_08010W_A/CR_09120C_A/CR_09520C_A	15
Alkalinization-responsive genes	GO:0046031	ADP metabolic process	20/2381	28/5910	0.714286	1.77296	3.36734	0.000822057	0.0165996	0.0151692	C1_04320W_A/C1_08330C_A/C1_08500C_A/C1_11080W_A/C1_13860C_A/C2_03270W_A/C2_04340C_A/C2_05460W_A/C3_06870W_A/C3_07440W_A/C4_01750C_A/C4_06570C_A/C4_07110C_A/C5_04810W_A/C6_00750C_A/C7_01800C_A/CR_04510W_A/CR_06340C_A/CR_07150W_A/CR_07490C_A	20
Alkalinization-responsive genes	GO:0016054	organic acid catabolic process	60/2381	108/5910	0.555556	1.37897	3.26469	0.000867022	0.0170956	0.0156225	C1_01740W_A/C1_02980W_A/C1_03320C_A/C1_03390W_A/C1_04290C_A/C1_04500W_A/C1_08190C_A/C1_08330C_A/C1_08400C_A/C1_08490W_A/C1_09690W_A/C1_10450W_A/C1_13860C_A/C2_00340C_A/C2_04230W_A/C2_04340C_A/C2_05250C_A/C2_05950C_A/C2_05960C_A/C2_05970C_A/C2_05990C_A/C2_06190W_A/C2_07260C_A/C2_07900W_A/C3_00810C_A/C3_01460C_A/C3_01930W_A/C3_01960C_A/C3_03040W_A/C3_03470W_A/C3_03480C_A/C3_06280W_A/C3_07360W_A/C4_…	60
Alkalinization-responsive genes	GO:0046395	carboxylic acid catabolic process	60/2381	108/5910	0.555556	1.37897	3.26469	0.000867022	0.0170956	0.0156225	C1_01740W_A/C1_02980W_A/C1_03320C_A/C1_03390W_A/C1_04290C_A/C1_04500W_A/C1_08190C_A/C1_08330C_A/C1_08400C_A/C1_08490W_A/C1_09690W_A/C1_10450W_A/C1_13860C_A/C2_00340C_A/C2_04230W_A/C2_04340C_A/C2_05250C_A/C2_05950C_A/C2_05960C_A/C2_05970C_A/C2_05990C_A/C2_06190W_A/C2_07260C_A/C2_07900W_A/C3_00810C_A/C3_01460C_A/C3_01930W_A/C3_01960C_A/C3_03040W_A/C3_03470W_A/C3_03480C_A/C3_06280W_A/C3_07360W_A/C4_…	60
Alkalinization-responsive genes	GO:0055085	transmembrane transport	207/2381	436/5910	0.474771	1.17845	3.17997	0.00093611	0.0177473	0.016218	C1_00390W_A/C1_01320W_A/C1_01750W_A/C1_01980W_A/C1_02050C_A/C1_02110C_A/C1_02120C_A/C1_02130C_A/C1_02530C_A/C1_03000W_A/C1_04650W_A/C1_05080W_A/C1_05470W_A/C1_05940W_A/C1_06000W_A/C1_06510C_A/C1_06610C_A/C1_06780W_A/C1_06980C_A/C1_07120W_A/C1_08070W_A/C1_08210C_A/C1_08680C_A/C1_08790W_A/C1_09210C_A/C1_09400C_A/C1_09470C_A/C1_10160W_A/C1_10200C_A/C1_10480W_A/C1_10610W_A/C1_10710C_A/C1_10750C_A/C1_…	207
Alkalinization-responsive genes	GO:1903825	organic acid transmembrane transport	43/2381	73/5910	0.589041	1.46209	3.26289	0.000942426	0.0177473	0.016218	C1_02530C_A/C1_06000W_A/C1_07120W_A/C1_10800C_A/C1_11870W_A/C1_12100C_A/C1_13400C_A/C2_04060C_A/C2_06680W_A/C2_09610W_A/C3_00920W_A/C3_02620C_A/C3_03230C_A/C3_03690W_A/C3_04270C_A/C3_04660C_A/C3_05460W_A/C3_05580C_A/C3_05600W_A/C3_06580W_A/C4_01100C_A/C4_01750C_A/C4_04030W_A/C4_05430C_A/C5_00870C_A/C5_01800C_A/C5_02790C_A/C5_03060C_A/C5_03500W_A/C6_00590W_A/C6_00830C_A/C6_00960W_A/C6_01060C_A/C6_…	43
Alkalinization-responsive genes	GO:1905039	carboxylic acid transmembrane transport	43/2381	73/5910	0.589041	1.46209	3.26289	0.000942426	0.0177473	0.016218	C1_02530C_A/C1_06000W_A/C1_07120W_A/C1_10800C_A/C1_11870W_A/C1_12100C_A/C1_13400C_A/C2_04060C_A/C2_06680W_A/C2_09610W_A/C3_00920W_A/C3_02620C_A/C3_03230C_A/C3_03690W_A/C3_04270C_A/C3_04660C_A/C3_05460W_A/C3_05580C_A/C3_05600W_A/C3_06580W_A/C4_01100C_A/C4_01750C_A/C4_04030W_A/C4_05430C_A/C5_00870C_A/C5_01800C_A/C5_02790C_A/C5_03060C_A/C5_03500W_A/C6_00590W_A/C6_00830C_A/C6_00960W_A/C6_01060C_A/C6_…	43
Alkalinization-responsive genes	GO:0016052	carbohydrate catabolic process	40/2381	67/5910	0.597015	1.48188	3.25814	0.000974841	0.0181537	0.0165894	C1_02130C_A/C1_02150W_A/C1_02180W_A/C1_02630C_A/C1_04320W_A/C1_06850W_A/C1_08500C_A/C1_09190C_A/C1_11080W_A/C1_13860C_A/C2_03270W_A/C2_03940C_A/C2_04340C_A/C2_05460W_A/C2_07210C_A/C3_02240C_A/C3_04290C_A/C3_06860C_A/C3_06870W_A/C3_07340W_A/C3_07440W_A/C4_01750C_A/C4_05300W_A/C4_07110C_A/C5_03900W_A/C5_04120C_A/C5_04810W_A/C5_04940W_A/C6_00750C_A/C6_01690W_A/C6_04350C_A/C7_00930W_A/C7_01800C_A/CR_…	40
Alkalinization-responsive genes	GO:0006081	aldehyde metabolic process	17/2381	23/5910	0.73913	1.83463	3.294	0.00110592	0.0201471	0.018411	C1_00410C_A/C1_00500C_A/C1_02590C_A/C1_02600W_A/C1_02980W_A/C1_08190C_A/C1_08320W_A/C1_08980C_A/C1_09690W_A/C1_13860C_A/C6_01750C_A/C6_02890C_A/C7_00400W_A/CR_03720W_A/CR_06700C_A/CR_09100C_A/CR_10250C_A	17
Alkalinization-responsive genes	GO:0009092	homoserine metabolic process	11/2381	13/5910	0.846154	2.10028	3.2619	0.00139644	0.023882	0.021824	C1_01870C_A/C1_02620C_A/C1_03760C_A/C2_00390C_A/C2_02370C_A/C4_05540W_A/C5_00650C_A/CR_01620C_A/CR_02170W_A/CR_08340W_A/CR_09010C_A	11
Alkalinization-responsive genes	GO:0019878	lysine biosynthetic process via aminoadipic acid	9/2381	10/5910	0.9	2.23394	3.20758	0.00176847	0.0295272	0.0269829	C1_02820W_A/C1_09180W_A/C2_00340C_A/C2_04460W_A/C3_06590W_A/C4_04410C_A/C4_05320W_A/C4_05560C_A/CR_04890W_A	9
Alkalinization-responsive genes	GO:0032886	regulation of microtubule-based process	21/2381	31/5910	0.677419	1.68146	3.12448	0.001797	0.0295272	0.0269829	C1_00950C_A/C1_01670C_A/C1_02380C_A/C1_09730W_A/C1_10010C_A/C1_13710C_A/C2_01410C_A/C2_05210W_A/C2_06670C_A/C2_10310C_A/C3_05720C_A/C3_07770C_A/C4_05330C_A/C5_00180W_A/C5_02340C_A/C7_03940C_A/CR_00320C_A/CR_06050W_A/CR_06160C_A/CR_08010W_A/CR_09520C_A	21
Alkalinization-responsive genes	GO:0070507	regulation of microtubule cytoskeleton organization	21/2381	31/5910	0.677419	1.68146	3.12448	0.001797	0.0295272	0.0269829	C1_00950C_A/C1_01670C_A/C1_02380C_A/C1_09730W_A/C1_10010C_A/C1_13710C_A/C2_01410C_A/C2_05210W_A/C2_06670C_A/C2_10310C_A/C3_05720C_A/C3_07770C_A/C4_05330C_A/C5_00180W_A/C5_02340C_A/C7_03940C_A/CR_00320C_A/CR_06050W_A/CR_06160C_A/CR_08010W_A/CR_09520C_A	21
Alkalinization-responsive genes	GO:0046365	monosaccharide catabolic process	12/2381	15/5910	0.8	1.98572	3.13956	0.0020509	0.0320545	0.0292924	C1_02130C_A/C1_02150W_A/C1_02180W_A/C2_05460W_A/C3_06860C_A/C3_07340W_A/C3_07440W_A/C4_05300W_A/C5_03900W_A/C5_04810W_A/C7_01800C_A/CR_02820W_A	12
Alkalinization-responsive genes	GO:0009081	branched-chain amino acid metabolic process	16/2381	22/5910	0.727273	1.8052	3.10772	0.00206556	0.0320545	0.0292924	C1_00170W_A/C1_06900C_A/C2_02370C_A/C2_04230W_A/C2_06190W_A/C2_09750W_A/C3_02320W_A/C3_05590C_A/C4_01370W_A/C4_05130C_A/C5_02180C_A/C5_05410C_A/C6_00870C_A/C6_02890C_A/C7_00400W_A/CR_06860C_A	16
Alkalinization-responsive genes	GO:0006855	xenobiotic transmembrane transport	33/2381	55/5910	0.6	1.48929	2.9943	0.00236503	0.0363201	0.0331904	C1_02530C_A/C1_03000W_A/C1_08790W_A/C1_10200C_A/C1_10710C_A/C1_13400C_A/C2_06680W_A/C3_00920W_A/C3_03070W_A/C3_03140C_A/C3_03440C_A/C3_03610W_A/C3_04270C_A/C3_04660C_A/C3_05220W_A/C3_05580C_A/C3_05600W_A/C4_01100C_A/C5_00590W_A/C5_02790C_A/C5_03060C_A/C6_01430C_A/C6_01440C_A/C6_03170C_A/C6_04620C_A/C7_03590C_A/C7_04250W_A/CR_00930W_A/CR_03270W_A/CR_03920C_A/CR_04210C_A/CR_04920W_A/CR_05480W_A	33
Alkalinization-responsive genes	GO:0046434	organophosphate catabolic process	31/2381	51/5910	0.607843	1.50876	2.99706	0.00238378	0.0363201	0.0331904	C1_01330C_A/C1_04320W_A/C1_08500C_A/C1_11080W_A/C1_13860C_A/C2_03270W_A/C2_04340C_A/C2_05460W_A/C3_06340W_A/C3_06870W_A/C3_07440W_A/C4_01750C_A/C4_06760W_A/C4_07110C_A/C5_02220C_A/C5_02290W_A/C5_04510W_A/C5_04810W_A/C6_00750C_A/C6_01990W_A/C6_02010C_A/C6_02420W_A/C7_01800C_A/CR_03020C_A/CR_03500W_A/CR_04510W_A/CR_06340C_A/CR_07150W_A/CR_07490C_A/CR_08300C_A/CR_09710W_A	31
Alkalinization-responsive genes	GO:0009435	NAD biosynthetic process	14/2381	19/5910	0.736842	1.82895	2.97251	0.00327673	0.0477548	0.0436397	C1_08490W_A/C2_01530C_A/C2_02510W_A/C2_02950W_A/C2_05460W_A/C3_00260C_A/C3_03180C_A/C3_07440W_A/C5_00800C_A/C5_04810W_A/C7_01800C_A/CR_00350W_A/CR_04230W_A/CR_05440W_A	14
Dal81-dependent alkalinization-responsive genes	GO:0008652	amino acid biosynthetic process	55/1206	114/5910	0.482456	2.36428	7.4471	1.78943e-11	1.1073e-09	1.01263e-09	C1_00170W_A/C1_02620C_A/C1_02820W_A/C1_02970W_A/C1_05020C_A/C1_05110C_A/C1_08410C_A/C1_09290C_A/C1_12210W_A/C2_02030W_A/C2_02370C_A/C2_02510W_A/C2_04230W_A/C2_04460W_A/C2_04810W_A/C2_05890C_A/C2_06190W_A/C2_08530C_A/C2_09060C_A/C3_02320W_A/C3_04660C_A/C3_05590C_A/C3_06590W_A/C4_00140C_A/C4_00200C_A/C4_00240C_A/C4_00650W_A/C4_00890W_A/C4_01550C_A/C4_04410C_A/C4_05070C_A/C4_05320W_A/C4_05540W_A/C4_…	55
Dal81-dependent alkalinization-responsive genes	GO:1901605	alpha-amino acid metabolic process	66/1206	150/5910	0.44	2.15622	7.26225	3.1242e-11	1.72612e-09	1.57855e-09	C1_00170W_A/C1_00410C_A/C1_02620C_A/C1_02820W_A/C1_05020C_A/C1_08330C_A/C1_08400C_A/C1_08410C_A/C1_09290C_A/C1_10700C_A/C1_12210W_A/C2_02370C_A/C2_02510W_A/C2_04230W_A/C2_04460W_A/C2_04810W_A/C2_05250C_A/C2_05890C_A/C2_06190W_A/C2_07900W_A/C2_08530C_A/C2_09060C_A/C3_00260C_A/C3_03470W_A/C3_04660C_A/C3_05590C_A/C3_06590W_A/C4_00140C_A/C4_00160C_A/C4_00200C_A/C4_00240C_A/C4_00650W_A/C4_01550C_A/C4_…	66
Dal81-dependent alkalinization-responsive genes	GO:1901607	alpha-amino acid biosynthetic process	48/1206	104/5910	0.461538	2.26177	6.57286	2.34026e-09	1.13137e-07	1.03464e-07	C1_00170W_A/C1_02620C_A/C1_02820W_A/C1_05020C_A/C1_08410C_A/C1_09290C_A/C1_12210W_A/C2_02370C_A/C2_02510W_A/C2_04230W_A/C2_04460W_A/C2_04810W_A/C2_05890C_A/C2_06190W_A/C2_08530C_A/C2_09060C_A/C3_04660C_A/C3_05590C_A/C3_06590W_A/C4_00140C_A/C4_00200C_A/C4_00240C_A/C4_00650W_A/C4_01550C_A/C4_04410C_A/C4_05070C_A/C4_05320W_A/C4_05540W_A/C4_06110C_A/C4_06120W_A/C4_07090C_A/C5_00650C_A/C5_02180C_A/C5_…	48
Dal81-dependent alkalinization-responsive genes	GO:0016053	organic acid biosynthetic process	78/1206	209/5910	0.373206	1.82889	6.17723	6.89738e-09	2.96396e-07	2.71055e-07	C1_00170W_A/C1_02620C_A/C1_02820W_A/C1_02970W_A/C1_03390W_A/C1_04320W_A/C1_05020C_A/C1_05110C_A/C1_08410C_A/C1_08500C_A/C1_09290C_A/C1_09380W_A/C1_11080W_A/C1_12210W_A/C1_12790C_A/C1_13330C_A/C1_13860C_A/C2_02030W_A/C2_02370C_A/C2_02510W_A/C2_03270W_A/C2_04230W_A/C2_04460W_A/C2_04810W_A/C2_05890C_A/C2_06190W_A/C2_07090C_A/C2_08530C_A/C2_09060C_A/C3_02320W_A/C3_04660C_A/C3_04830C_A/C3_05590C_A/C3_…	78
Dal81-dependent alkalinization-responsive genes	GO:0046394	carboxylic acid biosynthetic process	78/1206	209/5910	0.373206	1.82889	6.17723	6.89738e-09	2.96396e-07	2.71055e-07	C1_00170W_A/C1_02620C_A/C1_02820W_A/C1_02970W_A/C1_03390W_A/C1_04320W_A/C1_05020C_A/C1_05110C_A/C1_08410C_A/C1_08500C_A/C1_09290C_A/C1_09380W_A/C1_11080W_A/C1_12210W_A/C1_12790C_A/C1_13330C_A/C1_13860C_A/C2_02030W_A/C2_02370C_A/C2_02510W_A/C2_03270W_A/C2_04230W_A/C2_04460W_A/C2_04810W_A/C2_05890C_A/C2_06190W_A/C2_07090C_A/C2_08530C_A/C2_09060C_A/C3_02320W_A/C3_04660C_A/C3_04830C_A/C3_05590C_A/C3_…	78
Dal81-dependent alkalinization-responsive genes	GO:0006520	amino acid metabolic process	79/1206	213/5910	0.370892	1.81756	6.15291	7.63715e-09	3.19315e-07	2.92015e-07	C1_00170W_A/C1_00410C_A/C1_02620C_A/C1_02820W_A/C1_02970W_A/C1_05020C_A/C1_05110C_A/C1_08330C_A/C1_08400C_A/C1_08410C_A/C1_09290C_A/C1_10700C_A/C1_12210W_A/C1_13030C_A/C2_02030W_A/C2_02370C_A/C2_02510W_A/C2_04230W_A/C2_04460W_A/C2_04810W_A/C2_05250C_A/C2_05890C_A/C2_06190W_A/C2_07900W_A/C2_08530C_A/C2_09060C_A/C2_09310C_A/C3_00260C_A/C3_02240C_A/C3_02320W_A/C3_03470W_A/C3_04660C_A/C3_05590C_A/C3_…	79
Dal81-dependent alkalinization-responsive genes	GO:0019752	carboxylic acid metabolic process	130/1206	408/5910	0.318627	1.56143	5.95065	1.06614e-08	4.32893e-07	3.95882e-07	C1_00170W_A/C1_00410C_A/C1_01690C_A/C1_02620C_A/C1_02820W_A/C1_02970W_A/C1_03320C_A/C1_03390W_A/C1_04320W_A/C1_04500W_A/C1_05020C_A/C1_05110C_A/C1_08190C_A/C1_08330C_A/C1_08400C_A/C1_08410C_A/C1_08500C_A/C1_09290C_A/C1_09380W_A/C1_09690W_A/C1_10700C_A/C1_11080W_A/C1_12210W_A/C1_12790C_A/C1_13030C_A/C1_13330C_A/C1_13860C_A/C2_02030W_A/C2_02370C_A/C2_02510W_A/C2_03270W_A/C2_04230W_A/C2_04460W_A/C2_…	130
Dal81-dependent alkalinization-responsive genes	GO:0043436	oxoacid metabolic process	133/1206	420/5910	0.316667	1.55182	5.94068	1.09133e-08	4.32893e-07	3.95882e-07	C1_00170W_A/C1_00410C_A/C1_01690C_A/C1_02620C_A/C1_02820W_A/C1_02970W_A/C1_03320C_A/C1_03390W_A/C1_04320W_A/C1_04500W_A/C1_05020C_A/C1_05110C_A/C1_05940W_A/C1_08190C_A/C1_08330C_A/C1_08400C_A/C1_08410C_A/C1_08500C_A/C1_09290C_A/C1_09380W_A/C1_09690W_A/C1_10700C_A/C1_11080W_A/C1_11480W_A/C1_12210W_A/C1_12790C_A/C1_13030C_A/C1_13330C_A/C1_13860C_A/C2_02030W_A/C2_02370C_A/C2_02510W_A/C2_03270W_A/C2_…	133
Dal81-dependent alkalinization-responsive genes	GO:0006082	organic acid metabolic process	133/1206	421/5910	0.315914	1.54814	5.90856	1.28846e-08	4.74583e-07	4.34007e-07	C1_00170W_A/C1_00410C_A/C1_01690C_A/C1_02620C_A/C1_02820W_A/C1_02970W_A/C1_03320C_A/C1_03390W_A/C1_04320W_A/C1_04500W_A/C1_05020C_A/C1_05110C_A/C1_05940W_A/C1_08190C_A/C1_08330C_A/C1_08400C_A/C1_08410C_A/C1_08500C_A/C1_09290C_A/C1_09380W_A/C1_09690W_A/C1_10700C_A/C1_11080W_A/C1_11480W_A/C1_12210W_A/C1_12790C_A/C1_13030C_A/C1_13330C_A/C1_13860C_A/C2_02030W_A/C2_02370C_A/C2_02510W_A/C2_03270W_A/C2_…	133
Dal81-dependent alkalinization-responsive genes	GO:0044283	small molecule biosynthetic process	104/1206	335/5910	0.310448	1.52135	4.97422	1.43492e-06	4.18833e-05	3.83024e-05	C1_00170W_A/C1_00410C_A/C1_01650W_A/C1_02620C_A/C1_02820W_A/C1_02970W_A/C1_03390W_A/C1_04320W_A/C1_05020C_A/C1_05110C_A/C1_08330C_A/C1_08410C_A/C1_08500C_A/C1_09290C_A/C1_09380W_A/C1_09490C_A/C1_11080W_A/C1_12210W_A/C1_12790C_A/C1_13330C_A/C1_13860C_A/C2_02020W_A/C2_02030W_A/C2_02370C_A/C2_02510W_A/C2_02740C_A/C2_03270W_A/C2_04230W_A/C2_04460W_A/C2_04810W_A/C2_05550W_A/C2_05890C_A/C2_06190W_A/C2_…	104
Dal81-dependent alkalinization-responsive genes	GO:0009072	aromatic amino acid metabolic process	21/1206	38/5910	0.552632	2.70817	5.34844	2.1585e-06	6.07128e-05	5.55221e-05	C1_00410C_A/C1_05110C_A/C1_12210W_A/C2_02030W_A/C2_02510W_A/C2_04810W_A/C3_00260C_A/C4_00140C_A/C4_00650W_A/C4_00890W_A/C4_06110C_A/C4_06570C_A/C4_07090C_A/C5_00800C_A/C5_05080W_A/C5_05320C_A/C7_03720C_A/CR_01590C_A/CR_05440W_A/CR_06860C_A/CR_07710W_A	21
Dal81-dependent alkalinization-responsive genes	GO:0043414	macromolecule methylation	39/1206	98/5910	0.397959	1.9502	4.80243	7.47217e-06	0.000195923	0.000179172	C1_01030W_A/C1_01150C_A/C1_02190W_A/C1_07800W_A/C1_09040C_A/C1_11380W_A/C1_13730C_A/C1_14160W_A/C2_00620C_A/C2_03130W_A/C2_06480W_A/C2_08480W_A/C2_08840W_A/C3_01310W_A/C3_05140C_A/C3_05860C_A/C4_03730C_A/C4_03830W_A/C4_04810C_A/C4_06720W_A/C5_00210C_A/C5_00680W_A/C5_00950C_A/C5_01060C_A/C5_03250W_A/C6_04160C_A/C7_00490C_A/C7_02340C_A/CR_00670C_A/CR_00900W_A/CR_01620C_A/CR_01780W_A/CR_02030C_A/CR_…	39
Dal81-dependent alkalinization-responsive genes	GO:0032259	methylation	39/1206	99/5910	0.393939	1.9305	4.72721	9.94806e-06	0.00024428	0.000223395	C1_01030W_A/C1_01150C_A/C1_02190W_A/C1_07800W_A/C1_09040C_A/C1_11380W_A/C1_13730C_A/C1_14160W_A/C2_00620C_A/C2_03130W_A/C2_06480W_A/C2_08480W_A/C2_08840W_A/C3_01310W_A/C3_05140C_A/C3_05860C_A/C4_03730C_A/C4_03830W_A/C4_04810C_A/C4_06720W_A/C5_00210C_A/C5_00680W_A/C5_00950C_A/C5_01060C_A/C5_03250W_A/C6_04160C_A/C7_00490C_A/C7_02340C_A/CR_00670C_A/CR_00900W_A/CR_01620C_A/CR_01780W_A/CR_02030C_A/CR_…	39
Dal81-dependent alkalinization-responsive genes	GO:0009073	aromatic amino acid family biosynthetic process	15/1206	25/5910	0.6	2.9403	4.92223	1.66846e-05	0.000397094	0.000363144	C1_05110C_A/C1_12210W_A/C2_02030W_A/C2_02510W_A/C2_04810W_A/C4_00140C_A/C4_00650W_A/C4_00890W_A/C4_06110C_A/C4_07090C_A/C5_05080W_A/C5_05320C_A/C7_03720C_A/CR_01590C_A/CR_07710W_A	15
Dal81-dependent alkalinization-responsive genes	GO:0009064	glutamine family amino acid metabolic process	18/1206	34/5910	0.529412	2.59438	4.7205	2.56338e-05	0.000591872	0.000541269	C1_05020C_A/C1_09290C_A/C1_10700C_A/C2_05890C_A/C2_07900W_A/C3_03470W_A/C3_04660C_A/C4_00160C_A/C4_00240C_A/C4_01550C_A/C4_05070C_A/C4_06120W_A/C5_02600W_A/C5_04490C_A/C7_02150C_A/CR_01030W_A/CR_05050W_A/CR_07050C_A	18
Dal81-dependent alkalinization-responsive genes	GO:1900247	regulation of cytoplasmic translational elongation	9/1206	12/5910	0.75	3.67537	4.69699	7.20936e-05	0.00152779	0.00139717	C1_12570C_A/C2_01060C_A/C2_05620W_A/C2_05840W_A/C3_06060W_A/C4_00490W_A/C4_00690C_A/C5_03640W_A/C5_03700C_A	9
Dal81-dependent alkalinization-responsive genes	GO:0001522	pseudouridine synthesis	9/1206	13/5910	0.692308	3.39265	4.37253	0.000191809	0.00390432	0.00357052	C1_10620W_A/C1_11550W_A/C2_10270W_A/C5_01180W_A/C5_01610W_A/C6_02350C_A/CR_04110W_A/CR_04360C_A/CR_08020C_A	9
Dal81-dependent alkalinization-responsive genes	GO:2000765	regulation of cytoplasmic translation	12/1206	21/5910	0.571429	2.80028	4.18434	0.000230417	0.0044557	0.00407475	C1_12570C_A/C2_01060C_A/C2_05620W_A/C2_05840W_A/C2_07210C_A/C3_06060W_A/C4_00490W_A/C4_00690C_A/C5_01910W_A/C5_03250W_A/C5_03640W_A/C5_03700C_A	12
Dal81-dependent alkalinization-responsive genes	GO:0018202	peptidyl-histidine modification	8/1206	11/5910	0.727273	3.564	4.30945	0.000268555	0.00495912	0.00453514	C1_09040C_A/C2_01060C_A/C2_05620W_A/C2_05840W_A/C4_00490W_A/C4_00690C_A/C5_03640W_A/C5_03700C_A	8
Dal81-dependent alkalinization-responsive genes	GO:0071034	CUT catabolic process	8/1206	11/5910	0.727273	3.564	4.30945	0.000268555	0.00495912	0.00453514	C1_01160C_A/C1_05050C_A/C1_05360C_A/C1_07960W_A/C1_12350W_A/C4_02090C_A/C4_03740W_A/CR_02550C_A	8
Dal81-dependent alkalinization-responsive genes	GO:0071043	CUT metabolic process	8/1206	11/5910	0.727273	3.564	4.30945	0.000268555	0.00495912	0.00453514	C1_01160C_A/C1_05050C_A/C1_05360C_A/C1_07960W_A/C1_12350W_A/C4_02090C_A/C4_03740W_A/CR_02550C_A	8
Dal81-dependent alkalinization-responsive genes	GO:0006568	L-tryptophan metabolic process	10/1206	16/5910	0.625	3.06281	4.18323	0.000288458	0.00512925	0.00469072	C1_12210W_A/C2_02510W_A/C3_00260C_A/C4_06110C_A/C4_06570C_A/C4_07090C_A/C5_00800C_A/CR_01590C_A/CR_05440W_A/CR_06860C_A	10
Dal81-dependent alkalinization-responsive genes	GO:0006586	indolalkylamine metabolic process	10/1206	16/5910	0.625	3.06281	4.18323	0.000288458	0.00512925	0.00469072	C1_12210W_A/C2_02510W_A/C3_00260C_A/C4_06110C_A/C4_06570C_A/C4_07090C_A/C5_00800C_A/CR_01590C_A/CR_05440W_A/CR_06860C_A	10
Dal81-dependent alkalinization-responsive genes	GO:0042430	indole-containing compound metabolic process	10/1206	16/5910	0.625	3.06281	4.18323	0.000288458	0.00512925	0.00469072	C1_12210W_A/C2_02510W_A/C3_00260C_A/C4_06110C_A/C4_06570C_A/C4_07090C_A/C5_00800C_A/CR_01590C_A/CR_05440W_A/CR_06860C_A	10
Dal81-dependent alkalinization-responsive genes	GO:0043648	dicarboxylic acid metabolic process	18/1206	40/5910	0.45	2.20522	3.87236	0.000375949	0.00660901	0.00604396	C1_01690C_A/C1_10700C_A/C2_02370C_A/C2_05250C_A/C2_05890C_A/C2_07900W_A/C3_03470W_A/C3_07640C_A/C4_00160C_A/C4_00890W_A/C4_05540W_A/C4_06120W_A/C5_02600W_A/CR_00540C_A/CR_05050W_A/CR_07010W_A/CR_07420W_A/CR_07710W_A	18
Dal81-dependent alkalinization-responsive genes	GO:0072524	pyridine-containing compound metabolic process	28/1206	74/5910	0.378378	1.85424	3.744	0.00038742	0.00673414	0.0061584	C1_01650W_A/C1_04320W_A/C1_08320W_A/C1_08330C_A/C1_08500C_A/C1_11080W_A/C1_13860C_A/C2_01530C_A/C2_02510W_A/C2_03270W_A/C2_05890C_A/C2_08100W_A/C3_00260C_A/C3_06870W_A/C3_07440W_A/C4_01750C_A/C4_06570C_A/C5_00800C_A/C5_05050W_A/C6_00750C_A/C6_02010C_A/C6_02890C_A/CR_02360W_A/CR_04590C_A/CR_05440W_A/CR_07150W_A/CR_07490C_A/CR_09100C_A	28
Dal81-dependent alkalinization-responsive genes	GO:0006576	biogenic amine metabolic process	12/1206	22/5910	0.545455	2.673	3.98034	0.000413369	0.00687615	0.00628826	C1_12210W_A/C1_13330C_A/C2_02510W_A/C3_00260C_A/C4_06110C_A/C4_06570C_A/C4_07090C_A/C5_00700C_A/C5_00800C_A/CR_01590C_A/CR_05440W_A/CR_06860C_A	12
Dal81-dependent alkalinization-responsive genes	GO:0009081	branched-chain amino acid metabolic process	12/1206	22/5910	0.545455	2.673	3.98034	0.000413369	0.00687615	0.00628826	C1_00170W_A/C2_02370C_A/C2_04230W_A/C2_06190W_A/C3_02320W_A/C3_05590C_A/C4_05130C_A/C5_02180C_A/C5_05410C_A/C6_00870C_A/C6_02890C_A/CR_06860C_A	12
Dal81-dependent alkalinization-responsive genes	GO:0009084	glutamine family amino acid biosynthetic process	12/1206	22/5910	0.545455	2.673	3.98034	0.000413369	0.00687615	0.00628826	C1_05020C_A/C1_09290C_A/C2_05890C_A/C3_04660C_A/C4_00240C_A/C4_01550C_A/C4_05070C_A/C4_06120W_A/C5_02600W_A/C7_02150C_A/CR_01030W_A/CR_05050W_A	12
Dal81-dependent alkalinization-responsive genes	GO:0009082	branched-chain amino acid biosynthetic process	9/1206	14/5910	0.642857	3.15032	4.07836	0.000439888	0.00723944	0.00662049	C1_00170W_A/C2_02370C_A/C2_04230W_A/C2_06190W_A/C3_02320W_A/C3_05590C_A/C5_02180C_A/C5_05410C_A/C6_00870C_A	9
Dal81-dependent alkalinization-responsive genes	GO:0044282	small molecule catabolic process	47/1206	146/5910	0.321918	1.57756	3.57772	0.000474741	0.00773078	0.00706983	C1_02180W_A/C1_03320C_A/C1_03390W_A/C1_04500W_A/C1_08190C_A/C1_08330C_A/C1_08400C_A/C1_09690W_A/C1_13860C_A/C2_04230W_A/C2_05250C_A/C2_05950C_A/C2_05960C_A/C2_05990C_A/C2_06190W_A/C2_06830C_A/C2_07260C_A/C2_07900W_A/C3_00810C_A/C3_01460C_A/C3_01930W_A/C3_01960C_A/C3_03470W_A/C3_06340W_A/C3_06860C_A/C3_07340W_A/C3_07440W_A/C4_00160C_A/C4_01550C_A/C4_02020W_A/C4_05130C_A/C4_05300W_A/C4_06570C_A/C5_…	47
Dal81-dependent alkalinization-responsive genes	GO:0016054	organic acid catabolic process	37/1206	108/5910	0.342593	1.67887	3.60503	0.000497211	0.00792975	0.00725178	C1_03320C_A/C1_03390W_A/C1_04500W_A/C1_08190C_A/C1_08330C_A/C1_08400C_A/C1_09690W_A/C1_13860C_A/C2_04230W_A/C2_05250C_A/C2_05950C_A/C2_05960C_A/C2_05990C_A/C2_06190W_A/C2_07260C_A/C2_07900W_A/C3_00810C_A/C3_01460C_A/C3_01930W_A/C3_01960C_A/C3_03470W_A/C4_00160C_A/C4_01550C_A/C4_02020W_A/C4_05130C_A/C4_06570C_A/C5_00800C_A/C5_02600W_A/C5_04440C_A/C5_04490C_A/C6_02890C_A/CR_00150C_A/CR_01030W_A/CR_…	37
Dal81-dependent alkalinization-responsive genes	GO:0046395	carboxylic acid catabolic process	37/1206	108/5910	0.342593	1.67887	3.60503	0.000497211	0.00792975	0.00725178	C1_03320C_A/C1_03390W_A/C1_04500W_A/C1_08190C_A/C1_08330C_A/C1_08400C_A/C1_09690W_A/C1_13860C_A/C2_04230W_A/C2_05250C_A/C2_05950C_A/C2_05960C_A/C2_05990C_A/C2_06190W_A/C2_07260C_A/C2_07900W_A/C3_00810C_A/C3_01460C_A/C3_01930W_A/C3_01960C_A/C3_03470W_A/C4_00160C_A/C4_01550C_A/C4_02020W_A/C4_05130C_A/C4_06570C_A/C5_00800C_A/C5_02600W_A/C5_04440C_A/C5_04490C_A/C6_02890C_A/CR_00150C_A/CR_01030W_A/CR_…	37
Dal81-dependent alkalinization-responsive genes	GO:0009308	amine metabolic process	19/1206	45/5910	0.422222	2.0691	3.64491	0.000695737	0.0107014	0.00978648	C1_09380W_A/C1_12210W_A/C1_13330C_A/C2_02510W_A/C2_03120W_A/C3_00260C_A/C3_01280W_A/C3_02240C_A/C4_06110C_A/C4_06570C_A/C4_07090C_A/C5_00700C_A/C5_00800C_A/C5_02180C_A/C5_04490C_A/CR_01030W_A/CR_01590C_A/CR_05440W_A/CR_06860C_A	19
Dal81-dependent alkalinization-responsive genes	GO:0002182	cytoplasmic translational elongation	9/1206	15/5910	0.6	2.9403	3.80951	0.000901222	0.013278	0.0121428	C1_12570C_A/C2_01060C_A/C2_05620W_A/C2_05840W_A/C3_06060W_A/C4_00490W_A/C4_00690C_A/C5_03640W_A/C5_03700C_A	9
Dal81-dependent alkalinization-responsive genes	GO:0016052	carbohydrate catabolic process	25/1206	67/5910	0.373134	1.82854	3.45328	0.000992936	0.0139643	0.0127704	C1_02180W_A/C1_02630C_A/C1_04320W_A/C1_06850W_A/C1_08500C_A/C1_11080W_A/C1_13860C_A/C2_03270W_A/C2_03940C_A/C2_07210C_A/C3_02240C_A/C3_06860C_A/C3_06870W_A/C3_07340W_A/C3_07440W_A/C4_01750C_A/C4_05300W_A/C5_03900W_A/C5_04120C_A/C6_00750C_A/C7_00930W_A/CR_02820W_A/CR_07150W_A/CR_07490C_A/CR_10790W_A	25
Dal81-dependent alkalinization-responsive genes	GO:0009066	aspartate family amino acid metabolic process	20/1206	50/5910	0.4	1.9602	3.45219	0.00115409	0.0160845	0.0147093	C1_02820W_A/C1_08330C_A/C1_08410C_A/C1_10700C_A/C2_02370C_A/C2_04460W_A/C2_05250C_A/C2_06190W_A/C2_08530C_A/C2_09060C_A/C3_06590W_A/C4_04410C_A/C4_05320W_A/C4_05540W_A/C5_00650C_A/C5_02270W_A/CR_01400W_A/CR_01620C_A/CR_06860C_A/CR_08340W_A	20
Dal81-dependent alkalinization-responsive genes	GO:0006553	lysine metabolic process	8/1206	13/5910	0.615385	3.01569	3.68364	0.00141295	0.0193436	0.0176898	C1_02820W_A/C2_02370C_A/C2_04460W_A/C3_06590W_A/C4_04410C_A/C4_05320W_A/C4_05540W_A/CR_01400W_A	8
Dal81-dependent alkalinization-responsive genes	GO:0009085	lysine biosynthetic process	8/1206	13/5910	0.615385	3.01569	3.68364	0.00141295	0.0193436	0.0176898	C1_02820W_A/C2_02370C_A/C2_04460W_A/C3_06590W_A/C4_04410C_A/C4_05320W_A/C4_05540W_A/CR_01400W_A	8
Dal81-dependent alkalinization-responsive genes	GO:0006525	arginine metabolic process	9/1206	16/5910	0.5625	2.75653	3.56211	0.00168906	0.0225257	0.0205998	C1_05020C_A/C1_09290C_A/C3_04660C_A/C4_00160C_A/C4_01550C_A/C4_05070C_A/C5_04490C_A/C7_02150C_A/CR_01030W_A	9
Dal81-dependent alkalinization-responsive genes	GO:0015976	carbon utilization	9/1206	16/5910	0.5625	2.75653	3.56211	0.00168906	0.0225257	0.0205998	C1_04500W_A/C1_08190C_A/C1_08500C_A/C1_09690W_A/C2_10540W_A/C4_02020W_A/C4_03940C_A/C5_04440C_A/CR_00200W_A	9
Dal81-dependent alkalinization-responsive genes	GO:0046031	ADP metabolic process	13/1206	28/5910	0.464286	2.27523	3.42454	0.00171698	0.0227023	0.0207614	C1_04320W_A/C1_08330C_A/C1_08500C_A/C1_11080W_A/C1_13860C_A/C2_03270W_A/C3_06870W_A/C3_07440W_A/C4_01750C_A/C4_06570C_A/C6_00750C_A/CR_07150W_A/CR_07490C_A	13
Dal81-dependent alkalinization-responsive genes	GO:0098656	monoatomic anion transmembrane transport	32/1206	96/5910	0.333333	1.6335	3.16841	0.00194518	0.0255017	0.0233214	C1_02530C_A/C1_05940W_A/C1_06000W_A/C1_07120W_A/C1_10800C_A/C1_11480W_A/C1_11870W_A/C1_12100C_A/C2_06520C_A/C2_06590C_A/C3_02620C_A/C3_03070W_A/C3_03690W_A/C3_04270C_A/C3_04660C_A/C3_05460W_A/C3_05600W_A/C3_06580W_A/C3_06710W_A/C4_01100C_A/C4_01750C_A/C4_05430C_A/C5_03060C_A/C5_03500W_A/C6_00440C_A/C6_00960W_A/C6_01060C_A/C6_01440C_A/CR_00930W_A/CR_03270W_A/CR_09910W_A/CR_09920W_A	32
Dal81-dependent alkalinization-responsive genes	GO:0006090	pyruvate metabolic process	15/1206	35/5910	0.428571	2.10021	3.30525	0.00209618	0.0272504	0.0249206	C1_04320W_A/C1_08330C_A/C1_08500C_A/C1_11080W_A/C1_13860C_A/C2_03270W_A/C3_06870W_A/C3_07440W_A/C4_01750C_A/C4_03940C_A/C4_06570C_A/C6_00750C_A/CR_06860C_A/CR_07150W_A/CR_07490C_A	15
Dal81-dependent alkalinization-responsive genes	GO:0009309	amine biosynthetic process	7/1206	11/5910	0.636364	3.1185	3.56067	0.00220171	0.0281491	0.0257424	C1_12210W_A/C1_13330C_A/C2_02510W_A/C4_06110C_A/C4_07090C_A/C5_00700C_A/CR_01590C_A	7
Dal81-dependent alkalinization-responsive genes	GO:0042401	biogenic amine biosynthetic process	7/1206	11/5910	0.636364	3.1185	3.56067	0.00220171	0.0281491	0.0257424	C1_12210W_A/C1_13330C_A/C2_02510W_A/C4_06110C_A/C4_07090C_A/C5_00700C_A/CR_01590C_A	7
Dal81-dependent alkalinization-responsive genes	GO:0072525	pyridine-containing compound biosynthetic process	19/1206	49/5910	0.387755	1.90019	3.20365	0.00233826	0.0296499	0.0271149	C1_01650W_A/C1_04320W_A/C1_08500C_A/C1_11080W_A/C1_13860C_A/C2_01530C_A/C2_02510W_A/C2_03270W_A/C3_00260C_A/C3_06870W_A/C3_07440W_A/C4_01750C_A/C5_00800C_A/C6_00750C_A/CR_04590C_A/CR_05440W_A/CR_07150W_A/CR_07490C_A/CR_09100C_A	19
Dal81-dependent alkalinization-responsive genes	GO:0051701	biological process involved in interaction with host	8/1206	14/5910	0.571429	2.80028	3.41447	0.00271036	0.0338139	0.0309229	C1_06810W_A/C1_08500C_A/C2_03270W_A/C3_06870W_A/C4_01750C_A/C5_05050W_A/C6_00750C_A/C6_03500C_A	8
Dal81-dependent alkalinization-responsive genes	GO:0006096	glycolytic process	11/1206	23/5910	0.478261	2.34372	3.26905	0.00290076	0.0353345	0.0323135	C1_04320W_A/C1_08500C_A/C1_11080W_A/C1_13860C_A/C2_03270W_A/C3_06870W_A/C3_07440W_A/C4_01750C_A/C6_00750C_A/CR_07150W_A/CR_07490C_A	11
Dal81-dependent alkalinization-responsive genes	GO:0042866	pyruvate biosynthetic process	11/1206	23/5910	0.478261	2.34372	3.26905	0.00290076	0.0353345	0.0323135	C1_04320W_A/C1_08500C_A/C1_11080W_A/C1_13860C_A/C2_03270W_A/C3_06870W_A/C3_07440W_A/C4_01750C_A/C6_00750C_A/CR_07150W_A/CR_07490C_A	11
Dal81-dependent alkalinization-responsive genes	GO:1901606	alpha-amino acid catabolic process	16/1206	40/5910	0.4	1.9602	3.0851	0.00351864	0.0415522	0.0379996	C1_08330C_A/C1_08400C_A/C2_05250C_A/C2_06190W_A/C2_07900W_A/C3_03470W_A/C4_00160C_A/C4_01550C_A/C4_05130C_A/C4_06570C_A/C5_00800C_A/C5_02600W_A/C5_04490C_A/C6_02890C_A/CR_06860C_A/CR_07050C_A	16
Dal81-dependent alkalinization-responsive genes	GO:1903825	organic acid transmembrane transport	25/1206	73/5910	0.342466	1.67825	2.95226	0.00389983	0.0453612	0.041483	C1_02530C_A/C1_06000W_A/C1_07120W_A/C1_10800C_A/C1_11870W_A/C1_12100C_A/C3_02620C_A/C3_03690W_A/C3_04270C_A/C3_04660C_A/C3_05460W_A/C3_05600W_A/C3_06580W_A/C4_01100C_A/C4_01750C_A/C4_05430C_A/C5_03060C_A/C5_03500W_A/C6_00960W_A/C6_01060C_A/C6_01440C_A/CR_00930W_A/CR_03270W_A/CR_09910W_A/CR_09920W_A	25
Dal81-dependent alkalinization-responsive genes	GO:1905039	carboxylic acid transmembrane transport	25/1206	73/5910	0.342466	1.67825	2.95226	0.00389983	0.0453612	0.041483	C1_02530C_A/C1_06000W_A/C1_07120W_A/C1_10800C_A/C1_11870W_A/C1_12100C_A/C3_02620C_A/C3_03690W_A/C3_04270C_A/C3_04660C_A/C3_05460W_A/C3_05600W_A/C3_06580W_A/C4_01100C_A/C4_01750C_A/C4_05430C_A/C5_03060C_A/C5_03500W_A/C6_00960W_A/C6_01060C_A/C6_01440C_A/CR_00930W_A/CR_03270W_A/CR_09910W_A/CR_09920W_A	25
Dal81-dependent alkalinization-responsive genes	GO:0009063	amino acid catabolic process	19/1206	51/5910	0.372549	1.82568	2.99833	0.00396836	0.0458138	0.0418969	C1_08330C_A/C1_08400C_A/C2_04230W_A/C2_05250C_A/C2_06190W_A/C2_07900W_A/C3_03470W_A/C4_00160C_A/C4_01550C_A/C4_05130C_A/C4_06570C_A/C5_00800C_A/C5_02600W_A/C5_04490C_A/C6_02890C_A/CR_01030W_A/CR_06860C_A/CR_07050C_A/CR_10250C_A	19
Dal81-dependent alkalinization-responsive genes	GO:0006526	L-arginine biosynthetic process	7/1206	12/5910	0.583333	2.85862	3.26307	0.00435803	0.0491175	0.0449181	C1_05020C_A/C1_09290C_A/C3_04660C_A/C4_01550C_A/C4_05070C_A/C7_02150C_A/CR_01030W_A	7
Dal81-dependent alkalinization-responsive genes	GO:0006536	glutamate metabolic process	7/1206	12/5910	0.583333	2.85862	3.26307	0.00435803	0.0491175	0.0449181	C2_05890C_A/C2_07900W_A/C3_03470W_A/C4_00160C_A/C4_06120W_A/C5_02600W_A/CR_05050W_A	7
Dal81-dependent alkalinization-responsive genes	GO:0009065	glutamine family amino acid catabolic process	7/1206	12/5910	0.583333	2.85862	3.26307	0.00435803	0.0491175	0.0449181	C2_07900W_A/C3_03470W_A/C4_00160C_A/C4_01550C_A/C5_02600W_A/C5_04490C_A/CR_07050C_A	7
Stp2-dependent alkalinization-responsive genes	GO:0008652	amino acid biosynthetic process	54/1208	114/5910	0.473684	2.31745	7.19896	7.15892e-11	4.12566e-09	3.80134e-09	C1_00170W_A/C1_02590C_A/C1_02620C_A/C1_02820W_A/C1_02970W_A/C1_05020C_A/C1_05110C_A/C1_06900C_A/C1_08410C_A/C1_09290C_A/C1_10450W_A/C1_12210W_A/C2_02030W_A/C2_02370C_A/C2_02510W_A/C2_04230W_A/C2_04460W_A/C2_04810W_A/C2_05890C_A/C2_06190W_A/C2_08530C_A/C2_09060C_A/C3_02320W_A/C3_04660C_A/C3_05590C_A/C4_00140C_A/C4_00200C_A/C4_00240C_A/C4_00650W_A/C4_00890W_A/C4_01550C_A/C4_04410C_A/C4_05070C_A/C4_…	54
Stp2-dependent alkalinization-responsive genes	GO:1901605	alpha-amino acid metabolic process	61/1208	150/5910	0.406667	1.98957	6.222	8.2799e-09	3.88442e-07	3.57907e-07	C1_00170W_A/C1_02590C_A/C1_02620C_A/C1_02820W_A/C1_05020C_A/C1_06900C_A/C1_08330C_A/C1_08400C_A/C1_08410C_A/C1_09290C_A/C1_10450W_A/C1_10700C_A/C1_12210W_A/C2_02370C_A/C2_02510W_A/C2_04230W_A/C2_04460W_A/C2_04810W_A/C2_05250C_A/C2_05890C_A/C2_06190W_A/C2_07900W_A/C2_08530C_A/C2_09060C_A/C3_00260C_A/C3_03470W_A/C3_04660C_A/C3_05590C_A/C4_00140C_A/C4_00160C_A/C4_00200C_A/C4_00240C_A/C4_00650W_A/C4_…	61
Stp2-dependent alkalinization-responsive genes	GO:1901607	alpha-amino acid biosynthetic process	47/1208	104/5910	0.451923	2.21098	6.31487	8.48781e-09	3.88442e-07	3.57907e-07	C1_00170W_A/C1_02590C_A/C1_02620C_A/C1_02820W_A/C1_05020C_A/C1_06900C_A/C1_08410C_A/C1_09290C_A/C1_10450W_A/C1_12210W_A/C2_02370C_A/C2_02510W_A/C2_04230W_A/C2_04460W_A/C2_04810W_A/C2_05890C_A/C2_06190W_A/C2_08530C_A/C2_09060C_A/C3_04660C_A/C3_05590C_A/C4_00140C_A/C4_00200C_A/C4_00240C_A/C4_00650W_A/C4_01550C_A/C4_04410C_A/C4_05070C_A/C4_05320W_A/C4_05540W_A/C4_06110C_A/C4_06120W_A/C4_07090C_A/C5_…	47
Stp2-dependent alkalinization-responsive genes	GO:0016053	organic acid biosynthetic process	72/1208	209/5910	0.344498	1.68541	5.11329	1.10023e-06	3.64248e-05	3.35614e-05	C1_00170W_A/C1_02590C_A/C1_02620C_A/C1_02820W_A/C1_02970W_A/C1_03390W_A/C1_05020C_A/C1_05110C_A/C1_06900C_A/C1_08410C_A/C1_09290C_A/C1_09380W_A/C1_10450W_A/C1_11080W_A/C1_12210W_A/C1_12790C_A/C1_13860C_A/C2_02030W_A/C2_02370C_A/C2_02510W_A/C2_04230W_A/C2_04340C_A/C2_04460W_A/C2_04810W_A/C2_05890C_A/C2_06190W_A/C2_07090C_A/C2_08530C_A/C2_09060C_A/C3_02320W_A/C3_04660C_A/C3_05590C_A/C3_06870W_A/C3_…	72
Stp2-dependent alkalinization-responsive genes	GO:0046394	carboxylic acid biosynthetic process	72/1208	209/5910	0.344498	1.68541	5.11329	1.10023e-06	3.64248e-05	3.35614e-05	C1_00170W_A/C1_02590C_A/C1_02620C_A/C1_02820W_A/C1_02970W_A/C1_03390W_A/C1_05020C_A/C1_05110C_A/C1_06900C_A/C1_08410C_A/C1_09290C_A/C1_09380W_A/C1_10450W_A/C1_11080W_A/C1_12210W_A/C1_12790C_A/C1_13860C_A/C2_02030W_A/C2_02370C_A/C2_02510W_A/C2_04230W_A/C2_04340C_A/C2_04460W_A/C2_04810W_A/C2_05890C_A/C2_06190W_A/C2_07090C_A/C2_08530C_A/C2_09060C_A/C3_02320W_A/C3_04660C_A/C3_05590C_A/C3_06870W_A/C3_…	72
Stp2-dependent alkalinization-responsive genes	GO:1903825	organic acid transmembrane transport	33/1208	73/5910	0.452055	2.21163	5.2794	1.42107e-06	4.42236e-05	4.07472e-05	C1_02530C_A/C1_06000W_A/C1_07120W_A/C1_10800C_A/C1_12100C_A/C2_06680W_A/C3_00920W_A/C3_02620C_A/C3_03690W_A/C3_04270C_A/C3_04660C_A/C3_05460W_A/C3_05580C_A/C3_05600W_A/C3_06580W_A/C4_01750C_A/C4_04030W_A/C4_05430C_A/C5_02790C_A/C5_03060C_A/C5_03500W_A/C6_00590W_A/C6_00830C_A/C6_00960W_A/C6_01060C_A/C6_01430C_A/C6_01440C_A/C6_02650C_A/CR_00930W_A/CR_03270W_A/CR_05480W_A/CR_09910W_A/CR_09920W_A	33
Stp2-dependent alkalinization-responsive genes	GO:1905039	carboxylic acid transmembrane transport	33/1208	73/5910	0.452055	2.21163	5.2794	1.42107e-06	4.42236e-05	4.07472e-05	C1_02530C_A/C1_06000W_A/C1_07120W_A/C1_10800C_A/C1_12100C_A/C2_06680W_A/C3_00920W_A/C3_02620C_A/C3_03690W_A/C3_04270C_A/C3_04660C_A/C3_05460W_A/C3_05580C_A/C3_05600W_A/C3_06580W_A/C4_01750C_A/C4_04030W_A/C4_05430C_A/C5_02790C_A/C5_03060C_A/C5_03500W_A/C6_00590W_A/C6_00830C_A/C6_00960W_A/C6_01060C_A/C6_01430C_A/C6_01440C_A/C6_02650C_A/CR_00930W_A/CR_03270W_A/CR_05480W_A/CR_09910W_A/CR_09920W_A	33
Stp2-dependent alkalinization-responsive genes	GO:0098656	monoatomic anion transmembrane transport	40/1208	96/5910	0.416667	2.03849	5.19937	1.51208e-06	4.61331e-05	4.25066e-05	C1_02530C_A/C1_05940W_A/C1_06000W_A/C1_07120W_A/C1_10800C_A/C1_11480W_A/C1_12100C_A/C2_06520C_A/C2_06590C_A/C2_06680W_A/C3_00920W_A/C3_02620C_A/C3_03070W_A/C3_03690W_A/C3_04270C_A/C3_04660C_A/C3_05460W_A/C3_05580C_A/C3_05600W_A/C3_06580W_A/C3_06710W_A/C4_01750C_A/C4_04030W_A/C4_05430C_A/C5_02790C_A/C5_03060C_A/C5_03500W_A/C6_00440C_A/C6_00590W_A/C6_00830C_A/C6_00960W_A/C6_01060C_A/C6_01430C_A/C6_…	40
Stp2-dependent alkalinization-responsive genes	GO:0006520	amino acid metabolic process	72/1208	213/5910	0.338028	1.65376	4.92534	2.45038e-06	7.19394e-05	6.62843e-05	C1_00170W_A/C1_02590C_A/C1_02620C_A/C1_02820W_A/C1_02970W_A/C1_05020C_A/C1_05110C_A/C1_06900C_A/C1_08330C_A/C1_08400C_A/C1_08410C_A/C1_09290C_A/C1_10450W_A/C1_10700C_A/C1_12210W_A/C2_02030W_A/C2_02370C_A/C2_02510W_A/C2_04230W_A/C2_04460W_A/C2_04810W_A/C2_05250C_A/C2_05890C_A/C2_06190W_A/C2_07900W_A/C2_08530C_A/C2_09060C_A/C2_09310C_A/C3_00260C_A/C3_02240C_A/C3_02320W_A/C3_03470W_A/C3_04660C_A/C3_…	72
Stp2-dependent alkalinization-responsive genes	GO:0015849	organic acid transport	37/1208	91/5910	0.406593	1.98921	4.81986	7.39707e-06	0.000201927	0.000186054	C1_02530C_A/C1_05080W_A/C1_06000W_A/C1_07120W_A/C1_10800C_A/C1_12100C_A/C1_13350W_A/C2_06680W_A/C3_00920W_A/C3_02620C_A/C3_03690W_A/C3_04270C_A/C3_04660C_A/C3_05460W_A/C3_05580C_A/C3_05600W_A/C3_06580W_A/C4_01750C_A/C4_04030W_A/C4_05430C_A/C5_02790C_A/C5_03060C_A/C5_03500W_A/C5_04440C_A/C6_00590W_A/C6_00830C_A/C6_00960W_A/C6_01060C_A/C6_01430C_A/C6_01440C_A/C6_02650C_A/CR_00330C_A/CR_00930W_A/CR_…	37
Stp2-dependent alkalinization-responsive genes	GO:0046942	carboxylic acid transport	37/1208	91/5910	0.406593	1.98921	4.81986	7.39707e-06	0.000201927	0.000186054	C1_02530C_A/C1_05080W_A/C1_06000W_A/C1_07120W_A/C1_10800C_A/C1_12100C_A/C1_13350W_A/C2_06680W_A/C3_00920W_A/C3_02620C_A/C3_03690W_A/C3_04270C_A/C3_04660C_A/C3_05460W_A/C3_05580C_A/C3_05600W_A/C3_06580W_A/C4_01750C_A/C4_04030W_A/C4_05430C_A/C5_02790C_A/C5_03060C_A/C5_03500W_A/C5_04440C_A/C6_00590W_A/C6_00830C_A/C6_00960W_A/C6_01060C_A/C6_01430C_A/C6_01440C_A/C6_02650C_A/CR_00330C_A/CR_00930W_A/CR_…	37
Stp2-dependent alkalinization-responsive genes	GO:0043414	macromolecule methylation	39/1208	98/5910	0.397959	1.94697	4.7911	7.78953e-06	0.000208974	0.000192547	C1_01030W_A/C1_01150C_A/C1_02190W_A/C1_07800W_A/C1_09040C_A/C1_11380W_A/C1_13730C_A/C1_14160W_A/C2_00620C_A/C2_03130W_A/C2_06480W_A/C2_08480W_A/C2_08840W_A/C3_01310W_A/C3_05140C_A/C3_05860C_A/C4_03730C_A/C4_03830W_A/C4_04810C_A/C4_06720W_A/C5_00210C_A/C5_00680W_A/C5_00950C_A/C5_01060C_A/C5_03250W_A/C6_04160C_A/C7_00490C_A/C7_02340C_A/CR_00670C_A/CR_00900W_A/CR_01620C_A/CR_01780W_A/CR_02030C_A/CR_…	39
Stp2-dependent alkalinization-responsive genes	GO:0019752	carboxylic acid metabolic process	119/1208	408/5910	0.291667	1.42695	4.52993	8.65042e-06	0.000224334	0.000206699	C1_00170W_A/C1_01690C_A/C1_01740W_A/C1_02590C_A/C1_02620C_A/C1_02820W_A/C1_02970W_A/C1_02980W_A/C1_03320C_A/C1_03390W_A/C1_04500W_A/C1_05020C_A/C1_05110C_A/C1_06900C_A/C1_08190C_A/C1_08330C_A/C1_08400C_A/C1_08410C_A/C1_09290C_A/C1_09380W_A/C1_09690W_A/C1_10450W_A/C1_10700C_A/C1_11080W_A/C1_12210W_A/C1_12790C_A/C1_13630W_A/C1_13860C_A/C2_02030W_A/C2_02370C_A/C2_02510W_A/C2_04230W_A/C2_04340C_A/C2_…	119
Stp2-dependent alkalinization-responsive genes	GO:0032259	methylation	39/1208	99/5910	0.393939	1.9273	4.71588	1.03664e-05	0.000256034	0.000235908	C1_01030W_A/C1_01150C_A/C1_02190W_A/C1_07800W_A/C1_09040C_A/C1_11380W_A/C1_13730C_A/C1_14160W_A/C2_00620C_A/C2_03130W_A/C2_06480W_A/C2_08480W_A/C2_08840W_A/C3_01310W_A/C3_05140C_A/C3_05860C_A/C4_03730C_A/C4_03830W_A/C4_04810C_A/C4_06720W_A/C5_00210C_A/C5_00680W_A/C5_00950C_A/C5_01060C_A/C5_03250W_A/C6_04160C_A/C7_00490C_A/C7_02340C_A/CR_00670C_A/CR_00900W_A/CR_01620C_A/CR_01780W_A/CR_02030C_A/CR_…	39
Stp2-dependent alkalinization-responsive genes	GO:0043436	oxoacid metabolic process	121/1208	420/5910	0.288095	1.40947	4.41278	1.38357e-05	0.000331206	0.00030517	C1_00170W_A/C1_01690C_A/C1_01740W_A/C1_02590C_A/C1_02620C_A/C1_02820W_A/C1_02970W_A/C1_02980W_A/C1_03320C_A/C1_03390W_A/C1_04500W_A/C1_05020C_A/C1_05110C_A/C1_05940W_A/C1_06900C_A/C1_08190C_A/C1_08330C_A/C1_08400C_A/C1_08410C_A/C1_09290C_A/C1_09380W_A/C1_09690W_A/C1_10450W_A/C1_10700C_A/C1_11080W_A/C1_11480W_A/C1_12210W_A/C1_12790C_A/C1_13630W_A/C1_13860C_A/C2_02030W_A/C2_02370C_A/C2_02510W_A/C2_…	121
Stp2-dependent alkalinization-responsive genes	GO:0006082	organic acid metabolic process	121/1208	421/5910	0.287411	1.40612	4.38231	1.56509e-05	0.000368981	0.000339976	C1_00170W_A/C1_01690C_A/C1_01740W_A/C1_02590C_A/C1_02620C_A/C1_02820W_A/C1_02970W_A/C1_02980W_A/C1_03320C_A/C1_03390W_A/C1_04500W_A/C1_05020C_A/C1_05110C_A/C1_05940W_A/C1_06900C_A/C1_08190C_A/C1_08330C_A/C1_08400C_A/C1_08410C_A/C1_09290C_A/C1_09380W_A/C1_09690W_A/C1_10450W_A/C1_10700C_A/C1_11080W_A/C1_11480W_A/C1_12210W_A/C1_12790C_A/C1_13630W_A/C1_13860C_A/C2_02030W_A/C2_02370C_A/C2_02510W_A/C2_…	121
Stp2-dependent alkalinization-responsive genes	GO:0009073	aromatic amino acid family biosynthetic process	15/1208	25/5910	0.6	2.93543	4.915	1.70407e-05	0.000395751	0.000364641	C1_05110C_A/C1_12210W_A/C2_02030W_A/C2_02510W_A/C2_04810W_A/C4_00140C_A/C4_00650W_A/C4_00890W_A/C4_06110C_A/C4_07090C_A/C5_05080W_A/C5_05320C_A/C7_03720C_A/CR_01590C_A/CR_07710W_A	15
Stp2-dependent alkalinization-responsive genes	GO:0044283	small molecule biosynthetic process	98/1208	335/5910	0.292537	1.4312	4.11844	4.93193e-05	0.00106585	0.00098206	C1_00170W_A/C1_01330C_A/C1_01650W_A/C1_02590C_A/C1_02620C_A/C1_02820W_A/C1_02970W_A/C1_03390W_A/C1_05020C_A/C1_05110C_A/C1_06900C_A/C1_08330C_A/C1_08410C_A/C1_09290C_A/C1_09380W_A/C1_09490C_A/C1_10450W_A/C1_11080W_A/C1_12210W_A/C1_12790C_A/C1_13860C_A/C2_00480C_A/C2_02020W_A/C2_02030W_A/C2_02370C_A/C2_02510W_A/C2_02740C_A/C2_04230W_A/C2_04340C_A/C2_04460W_A/C2_04580W_A/C2_04810W_A/C2_05550W_A/C2_…	98
Stp2-dependent alkalinization-responsive genes	GO:0009082	branched-chain amino acid biosynthetic process	10/1208	14/5910	0.714286	3.49456	4.73618	5.48104e-05	0.00116829	0.00107645	C1_00170W_A/C1_06900C_A/C2_02370C_A/C2_04230W_A/C2_06190W_A/C3_02320W_A/C3_05590C_A/C5_02180C_A/C5_05410C_A/C6_00870C_A	10
Stp2-dependent alkalinization-responsive genes	GO:1900247	regulation of cytoplasmic translational elongation	9/1208	12/5910	0.75	3.66929	4.69119	7.3099e-05	0.00153706	0.00141623	C1_12570C_A/C2_01060C_A/C2_05620W_A/C2_05840W_A/C3_06060W_A/C4_00490W_A/C4_00690C_A/C5_03640W_A/C5_03700C_A	9
Stp2-dependent alkalinization-responsive genes	GO:0009081	branched-chain amino acid metabolic process	13/1208	22/5910	0.590909	2.89095	4.50358	7.93895e-05	0.00164707	0.00151759	C1_00170W_A/C1_06900C_A/C2_02370C_A/C2_04230W_A/C2_06190W_A/C3_02320W_A/C3_05590C_A/C4_05130C_A/C5_02180C_A/C5_05410C_A/C6_00870C_A/C6_02890C_A/CR_06860C_A	13
Stp2-dependent alkalinization-responsive genes	GO:0016054	organic acid catabolic process	39/1208	108/5910	0.361111	1.76669	4.07563	0.000103556	0.00205928	0.00189741	C1_01740W_A/C1_02980W_A/C1_03320C_A/C1_03390W_A/C1_04500W_A/C1_08190C_A/C1_08330C_A/C1_08400C_A/C1_09690W_A/C1_10450W_A/C1_13860C_A/C2_04230W_A/C2_04340C_A/C2_05250C_A/C2_05950C_A/C2_05960C_A/C2_05990C_A/C2_06190W_A/C2_07260C_A/C2_07900W_A/C3_00810C_A/C3_01930W_A/C3_01960C_A/C3_03470W_A/C4_00160C_A/C4_01550C_A/C4_02020W_A/C4_02500C_A/C4_05130C_A/C5_02600W_A/C5_04440C_A/C5_04490C_A/C6_02890C_A/CR_…	39
Stp2-dependent alkalinization-responsive genes	GO:0046395	carboxylic acid catabolic process	39/1208	108/5910	0.361111	1.76669	4.07563	0.000103556	0.00205928	0.00189741	C1_01740W_A/C1_02980W_A/C1_03320C_A/C1_03390W_A/C1_04500W_A/C1_08190C_A/C1_08330C_A/C1_08400C_A/C1_09690W_A/C1_10450W_A/C1_13860C_A/C2_04230W_A/C2_04340C_A/C2_05250C_A/C2_05950C_A/C2_05960C_A/C2_05990C_A/C2_06190W_A/C2_07260C_A/C2_07900W_A/C3_00810C_A/C3_01930W_A/C3_01960C_A/C3_03470W_A/C4_00160C_A/C4_01550C_A/C4_02020W_A/C4_02500C_A/C4_05130C_A/C5_02600W_A/C5_04440C_A/C5_04490C_A/C6_02890C_A/CR_…	39
Stp2-dependent alkalinization-responsive genes	GO:0009064	glutamine family amino acid metabolic process	17/1208	34/5910	0.5	2.44619	4.28621	0.000112867	0.00219527	0.0020227	C1_05020C_A/C1_09290C_A/C1_10700C_A/C2_05890C_A/C2_07900W_A/C3_03470W_A/C3_04660C_A/C4_00160C_A/C4_00240C_A/C4_01550C_A/C4_05070C_A/C4_06120W_A/C5_02600W_A/C5_04490C_A/C7_02150C_A/CR_01030W_A/CR_07050C_A	17
Stp2-dependent alkalinization-responsive genes	GO:0009072	aromatic amino acid metabolic process	18/1208	38/5910	0.473684	2.31745	4.12934	0.000172833	0.0033201	0.00305911	C1_05110C_A/C1_12210W_A/C2_02030W_A/C2_02510W_A/C2_04810W_A/C3_00260C_A/C4_00140C_A/C4_00650W_A/C4_00890W_A/C4_06110C_A/C4_07090C_A/C5_05080W_A/C5_05320C_A/C7_03720C_A/CR_01590C_A/CR_05440W_A/CR_06860C_A/CR_07710W_A	18
Stp2-dependent alkalinization-responsive genes	GO:0001522	pseudouridine synthesis	9/1208	13/5910	0.692308	3.38704	4.36681	0.000194413	0.0036891	0.0033991	C1_10620W_A/C1_11550W_A/C2_10270W_A/C5_01180W_A/C5_01610W_A/C6_02350C_A/CR_04110W_A/CR_04360C_A/CR_08020C_A	9
Stp2-dependent alkalinization-responsive genes	GO:2000765	regulation of cytoplasmic translation	12/1208	21/5910	0.571429	2.79565	4.17791	0.000234265	0.00439175	0.00404652	C1_12570C_A/C2_01060C_A/C2_05620W_A/C2_05840W_A/C2_07210C_A/C3_06060W_A/C4_00490W_A/C4_00690C_A/C5_01910W_A/C5_03250W_A/C5_03640W_A/C5_03700C_A	12
Stp2-dependent alkalinization-responsive genes	GO:0018202	peptidyl-histidine modification	8/1208	11/5910	0.727273	3.5581	4.30401	0.000271851	0.00491861	0.00453196	C1_09040C_A/C2_01060C_A/C2_05620W_A/C2_05840W_A/C4_00490W_A/C4_00690C_A/C5_03640W_A/C5_03700C_A	8
Stp2-dependent alkalinization-responsive genes	GO:0071034	CUT catabolic process	8/1208	11/5910	0.727273	3.5581	4.30401	0.000271851	0.00491861	0.00453196	C1_01160C_A/C1_05050C_A/C1_05360C_A/C1_07960W_A/C1_12350W_A/C4_02090C_A/C4_03740W_A/CR_02550C_A	8
Stp2-dependent alkalinization-responsive genes	GO:0071043	CUT metabolic process	8/1208	11/5910	0.727273	3.5581	4.30401	0.000271851	0.00491861	0.00453196	C1_01160C_A/C1_05050C_A/C1_05360C_A/C1_07960W_A/C1_12350W_A/C4_02090C_A/C4_03740W_A/CR_02550C_A	8
Stp2-dependent alkalinization-responsive genes	GO:0044282	small molecule catabolic process	47/1208	146/5910	0.321918	1.57495	3.56525	0.000493592	0.00862954	0.00795118	C1_01740W_A/C1_02980W_A/C1_03320C_A/C1_03390W_A/C1_04500W_A/C1_08190C_A/C1_08330C_A/C1_08400C_A/C1_09690W_A/C1_10450W_A/C1_13860C_A/C2_04230W_A/C2_04340C_A/C2_05250C_A/C2_05950C_A/C2_05960C_A/C2_05990C_A/C2_06190W_A/C2_06830C_A/C2_07260C_A/C2_07900W_A/C3_00810C_A/C3_01930W_A/C3_01960C_A/C3_03470W_A/C3_06340W_A/C3_07340W_A/C3_07440W_A/C4_00160C_A/C4_01550C_A/C4_02020W_A/C4_02500C_A/C4_05130C_A/C4_…	47
Stp2-dependent alkalinization-responsive genes	GO:0015718	monocarboxylic acid transport	15/1208	32/5910	0.46875	2.29331	3.71801	0.00068965	0.0116641	0.0107472	C1_05080W_A/C1_12100C_A/C2_06680W_A/C3_00920W_A/C3_02620C_A/C3_05600W_A/C3_06580W_A/C4_04030W_A/C6_00590W_A/C6_01430C_A/C6_01440C_A/C6_02650C_A/CR_00330C_A/CR_00930W_A/CR_03270W_A	15
Stp2-dependent alkalinization-responsive genes	GO:0006820	monoatomic anion transport	56/1208	185/5910	0.302703	1.48094	3.3685	0.000841561	0.0139305	0.0128355	C1_02530C_A/C1_03820W_A/C1_05080W_A/C1_05470W_A/C1_05940W_A/C1_06000W_A/C1_07120W_A/C1_10800C_A/C1_11480W_A/C1_12100C_A/C1_13350W_A/C2_06520C_A/C2_06590C_A/C2_06680W_A/C3_00920W_A/C3_02620C_A/C3_03070W_A/C3_03690W_A/C3_04270C_A/C3_04660C_A/C3_04910C_A/C3_05220W_A/C3_05460W_A/C3_05580C_A/C3_05600W_A/C3_06580W_A/C3_06710W_A/C4_01560C_A/C4_01750C_A/C4_04030W_A/C4_05430C_A/C4_06370C_A/C4_06530C_A/C5_…	56
Stp2-dependent alkalinization-responsive genes	GO:0002182	cytoplasmic translational elongation	9/1208	15/5910	0.6	2.93543	3.80391	0.000912791	0.0149506	0.0137753	C1_12570C_A/C2_01060C_A/C2_05620W_A/C2_05840W_A/C3_06060W_A/C4_00490W_A/C4_00690C_A/C5_03640W_A/C5_03700C_A	9
Stp2-dependent alkalinization-responsive genes	GO:0006566	threonine metabolic process	7/1208	10/5910	0.7	3.42467	3.88934	0.000981828	0.0154316	0.0142185	C1_08330C_A/C1_10450W_A/C2_02370C_A/C2_06190W_A/C4_05540W_A/C5_00650C_A/C5_02270W_A	7
Stp2-dependent alkalinization-responsive genes	GO:0043648	dicarboxylic acid metabolic process	17/1208	40/5910	0.425	2.07926	3.47126	0.00122966	0.0191336	0.0176295	C1_01690C_A/C1_10700C_A/C2_02370C_A/C2_05250C_A/C2_05890C_A/C2_07900W_A/C3_03470W_A/C3_07640C_A/C4_00160C_A/C4_00890W_A/C4_05540W_A/C4_06120W_A/C5_02600W_A/CR_00540C_A/CR_07010W_A/CR_07420W_A/CR_07710W_A	17
Stp2-dependent alkalinization-responsive genes	GO:0015711	organic anion transport	48/1208	156/5910	0.307692	1.50535	3.24204	0.00131541	0.0202651	0.018672	C1_02530C_A/C1_03820W_A/C1_05080W_A/C1_05470W_A/C1_06000W_A/C1_07120W_A/C1_10800C_A/C1_12100C_A/C1_13350W_A/C2_06520C_A/C2_06590C_A/C2_06680W_A/C3_00920W_A/C3_02620C_A/C3_03690W_A/C3_04270C_A/C3_04660C_A/C3_04910C_A/C3_05220W_A/C3_05460W_A/C3_05580C_A/C3_05600W_A/C3_06580W_A/C4_01560C_A/C4_01750C_A/C4_04030W_A/C4_05430C_A/C4_06530C_A/C5_00480C_A/C5_02790C_A/C5_03060C_A/C5_03500W_A/C5_04440C_A/C6_…	48
Stp2-dependent alkalinization-responsive genes	GO:0055085	transmembrane transport	114/1208	436/5910	0.261468	1.2792	3.07014	0.00166538	0.0254052	0.0234081	C1_01320W_A/C1_02110C_A/C1_02530C_A/C1_04650W_A/C1_05080W_A/C1_05470W_A/C1_05940W_A/C1_06000W_A/C1_06610C_A/C1_06780W_A/C1_06980C_A/C1_07120W_A/C1_08070W_A/C1_08210C_A/C1_08680C_A/C1_09400C_A/C1_10610W_A/C1_10800C_A/C1_11480W_A/C1_12100C_A/C1_13480W_A/C1_14220C_A/C2_01010W_A/C2_02610C_A/C2_02850W_A/C2_04510W_A/C2_04940C_A/C2_06020W_A/C2_06520C_A/C2_06590C_A/C2_06680W_A/C2_07380W_A/C2_07730W_A/C2_…	114
Stp2-dependent alkalinization-responsive genes	GO:0006525	arginine metabolic process	9/1208	16/5910	0.5625	2.75197	3.55656	0.00171013	0.0255861	0.0235748	C1_05020C_A/C1_09290C_A/C3_04660C_A/C4_00160C_A/C4_01550C_A/C4_05070C_A/C5_04490C_A/C7_02150C_A/CR_01030W_A	9
Stp2-dependent alkalinization-responsive genes	GO:0015976	carbon utilization	9/1208	16/5910	0.5625	2.75197	3.55656	0.00171013	0.0255861	0.0235748	C1_04500W_A/C1_08190C_A/C1_09690W_A/C2_10540W_A/C4_02020W_A/C4_03940C_A/C5_04440C_A/C6_00090W_A/CR_00200W_A	9
Stp2-dependent alkalinization-responsive genes	GO:0006855	xenobiotic transmembrane transport	21/1208	55/5910	0.381818	1.868	3.27784	0.00180364	0.0267282	0.0246271	C1_02530C_A/C2_06680W_A/C3_00920W_A/C3_03070W_A/C3_04270C_A/C3_04660C_A/C3_05220W_A/C3_05580C_A/C3_05600W_A/C5_02790C_A/C5_03060C_A/C6_01430C_A/C6_01440C_A/C6_03170C_A/C6_04620C_A/C7_03590C_A/CR_00930W_A/CR_03270W_A/CR_03920C_A/CR_04210C_A/CR_05480W_A	21
Stp2-dependent alkalinization-responsive genes	GO:0009084	glutamine family amino acid biosynthetic process	11/1208	22/5910	0.5	2.44619	3.44431	0.0018771	0.0275545	0.0253884	C1_05020C_A/C1_09290C_A/C2_05890C_A/C3_04660C_A/C4_00240C_A/C4_01550C_A/C4_05070C_A/C4_06120W_A/C5_02600W_A/C7_02150C_A/CR_01030W_A	11
Stp2-dependent alkalinization-responsive genes	GO:0072329	monocarboxylic acid catabolic process	23/1208	63/5910	0.365079	1.78611	3.17933	0.00223248	0.0318691	0.0293639	C1_01740W_A/C1_02980W_A/C1_03320C_A/C1_03390W_A/C1_04500W_A/C1_08190C_A/C1_09690W_A/C1_13860C_A/C2_04340C_A/C2_05950C_A/C2_05960C_A/C2_05990C_A/C2_07260C_A/C3_00810C_A/C3_01930W_A/C3_01960C_A/C3_03470W_A/C4_02020W_A/C4_02500C_A/C5_04440C_A/CR_00150C_A/CR_01030W_A/CR_07730W_A	23
Stp2-dependent alkalinization-responsive genes	GO:0009066	aspartate family amino acid metabolic process	19/1208	50/5910	0.38	1.85911	3.09195	0.00312498	0.0434149	0.0400021	C1_02820W_A/C1_08330C_A/C1_08410C_A/C1_10450W_A/C1_10700C_A/C2_02370C_A/C2_04460W_A/C2_05250C_A/C2_06190W_A/C2_08530C_A/C2_09060C_A/C4_04410C_A/C4_05320W_A/C4_05540W_A/C5_00650C_A/C5_02270W_A/CR_01400W_A/CR_01620C_A/CR_06860C_A	19
Dal81 and Stp2 co-dependent alkalinization-responsive genes	GO:0008652	amino acid biosynthetic process	51/1054	114/5910	0.447368	2.50849	7.57649	1.77528e-11	9.14577e-10	8.48012e-10	C1_00170W_A/C1_02620C_A/C1_02820W_A/C1_02970W_A/C1_05020C_A/C1_05110C_A/C1_08410C_A/C1_09290C_A/C1_12210W_A/C2_02030W_A/C2_02370C_A/C2_02510W_A/C2_04230W_A/C2_04460W_A/C2_04810W_A/C2_05890C_A/C2_06190W_A/C2_08530C_A/C2_09060C_A/C3_02320W_A/C3_04660C_A/C3_05590C_A/C4_00140C_A/C4_00200C_A/C4_00240C_A/C4_00650W_A/C4_00890W_A/C4_01550C_A/C4_04410C_A/C4_05070C_A/C4_05320W_A/C4_05540W_A/C4_06110C_A/C4_…	51
Dal81 and Stp2 co-dependent alkalinization-responsive genes	GO:1901605	alpha-amino acid metabolic process	58/1054	150/5910	0.386667	2.16812	6.75088	8.73778e-10	4.07945e-08	3.78254e-08	C1_00170W_A/C1_02620C_A/C1_02820W_A/C1_05020C_A/C1_08330C_A/C1_08400C_A/C1_08410C_A/C1_09290C_A/C1_10700C_A/C1_12210W_A/C2_02370C_A/C2_02510W_A/C2_04230W_A/C2_04460W_A/C2_04810W_A/C2_05250C_A/C2_05890C_A/C2_06190W_A/C2_07900W_A/C2_08530C_A/C2_09060C_A/C3_00260C_A/C3_03470W_A/C3_04660C_A/C3_05590C_A/C4_00140C_A/C4_00160C_A/C4_00200C_A/C4_00240C_A/C4_00650W_A/C4_01550C_A/C4_04410C_A/C4_05070C_A/C4_…	58
Dal81 and Stp2 co-dependent alkalinization-responsive genes	GO:1901607	alpha-amino acid biosynthetic process	44/1054	104/5910	0.423077	2.37228	6.57748	3.86344e-09	1.60333e-07	1.48663e-07	C1_00170W_A/C1_02620C_A/C1_02820W_A/C1_05020C_A/C1_08410C_A/C1_09290C_A/C1_12210W_A/C2_02370C_A/C2_02510W_A/C2_04230W_A/C2_04460W_A/C2_04810W_A/C2_05890C_A/C2_06190W_A/C2_08530C_A/C2_09060C_A/C3_04660C_A/C3_05590C_A/C4_00140C_A/C4_00200C_A/C4_00240C_A/C4_00650W_A/C4_01550C_A/C4_04410C_A/C4_05070C_A/C4_05320W_A/C4_05540W_A/C4_06110C_A/C4_06120W_A/C4_07090C_A/C5_00650C_A/C5_02180C_A/C5_02270W_A/C5_…	44
Dal81 and Stp2 co-dependent alkalinization-responsive genes	GO:0006520	amino acid metabolic process	69/1054	213/5910	0.323944	1.81642	5.65351	1.19683e-07	3.88708e-06	3.60417e-06	C1_00170W_A/C1_02620C_A/C1_02820W_A/C1_02970W_A/C1_05020C_A/C1_05110C_A/C1_08330C_A/C1_08400C_A/C1_08410C_A/C1_09290C_A/C1_10700C_A/C1_12210W_A/C2_02030W_A/C2_02370C_A/C2_02510W_A/C2_04230W_A/C2_04460W_A/C2_04810W_A/C2_05250C_A/C2_05890C_A/C2_06190W_A/C2_07900W_A/C2_08530C_A/C2_09060C_A/C2_09310C_A/C3_00260C_A/C3_02240C_A/C3_02320W_A/C3_03470W_A/C3_04660C_A/C3_05590C_A/C4_00140C_A/C4_00160C_A/C4_…	69
Dal81 and Stp2 co-dependent alkalinization-responsive genes	GO:0043414	macromolecule methylation	39/1054	98/5910	0.397959	2.23144	5.72667	2.16675e-07	6.81182e-06	6.31604e-06	C1_01030W_A/C1_01150C_A/C1_02190W_A/C1_07800W_A/C1_09040C_A/C1_11380W_A/C1_13730C_A/C1_14160W_A/C2_00620C_A/C2_03130W_A/C2_06480W_A/C2_08480W_A/C2_08840W_A/C3_01310W_A/C3_05140C_A/C3_05860C_A/C4_03730C_A/C4_03830W_A/C4_04810C_A/C4_06720W_A/C5_00210C_A/C5_00680W_A/C5_00950C_A/C5_01060C_A/C5_03250W_A/C6_04160C_A/C7_00490C_A/C7_02340C_A/CR_00670C_A/CR_00900W_A/CR_01620C_A/CR_01780W_A/CR_02030C_A/CR_…	39
Dal81 and Stp2 co-dependent alkalinization-responsive genes	GO:0016053	organic acid biosynthetic process	67/1054	209/5910	0.320574	1.79753	5.46866	2.854e-07	8.19977e-06	7.60297e-06	C1_00170W_A/C1_02620C_A/C1_02820W_A/C1_02970W_A/C1_03390W_A/C1_05020C_A/C1_05110C_A/C1_08410C_A/C1_09290C_A/C1_09380W_A/C1_11080W_A/C1_12210W_A/C1_12790C_A/C1_13860C_A/C2_02030W_A/C2_02370C_A/C2_02510W_A/C2_04230W_A/C2_04460W_A/C2_04810W_A/C2_05890C_A/C2_06190W_A/C2_07090C_A/C2_08530C_A/C2_09060C_A/C3_02320W_A/C3_04660C_A/C3_05590C_A/C3_06870W_A/C3_07440W_A/C4_00140C_A/C4_00200C_A/C4_00240C_A/C4_…	67
Dal81 and Stp2 co-dependent alkalinization-responsive genes	GO:0046394	carboxylic acid biosynthetic process	67/1054	209/5910	0.320574	1.79753	5.46866	2.854e-07	8.19977e-06	7.60297e-06	C1_00170W_A/C1_02620C_A/C1_02820W_A/C1_02970W_A/C1_03390W_A/C1_05020C_A/C1_05110C_A/C1_08410C_A/C1_09290C_A/C1_09380W_A/C1_11080W_A/C1_12210W_A/C1_12790C_A/C1_13860C_A/C2_02030W_A/C2_02370C_A/C2_02510W_A/C2_04230W_A/C2_04460W_A/C2_04810W_A/C2_05890C_A/C2_06190W_A/C2_07090C_A/C2_08530C_A/C2_09060C_A/C3_02320W_A/C3_04660C_A/C3_05590C_A/C3_06870W_A/C3_07440W_A/C4_00140C_A/C4_00200C_A/C4_00240C_A/C4_…	67
Dal81 and Stp2 co-dependent alkalinization-responsive genes	GO:0032259	methylation	39/1054	99/5910	0.393939	2.2089	5.65094	2.97292e-07	8.38027e-06	7.77033e-06	C1_01030W_A/C1_01150C_A/C1_02190W_A/C1_07800W_A/C1_09040C_A/C1_11380W_A/C1_13730C_A/C1_14160W_A/C2_00620C_A/C2_03130W_A/C2_06480W_A/C2_08480W_A/C2_08840W_A/C3_01310W_A/C3_05140C_A/C3_05860C_A/C4_03730C_A/C4_03830W_A/C4_04810C_A/C4_06720W_A/C5_00210C_A/C5_00680W_A/C5_00950C_A/C5_01060C_A/C5_03250W_A/C6_04160C_A/C7_00490C_A/C7_02340C_A/CR_00670C_A/CR_00900W_A/CR_01620C_A/CR_01780W_A/CR_02030C_A/CR_…	39
Dal81 and Stp2 co-dependent alkalinization-responsive genes	GO:0019752	carboxylic acid metabolic process	110/1054	408/5910	0.269608	1.51175	4.99073	1.35736e-06	3.49636e-05	3.24189e-05	C1_00170W_A/C1_01690C_A/C1_02620C_A/C1_02820W_A/C1_02970W_A/C1_03320C_A/C1_03390W_A/C1_04500W_A/C1_05020C_A/C1_05110C_A/C1_08190C_A/C1_08330C_A/C1_08400C_A/C1_08410C_A/C1_09290C_A/C1_09380W_A/C1_09690W_A/C1_10700C_A/C1_11080W_A/C1_12210W_A/C1_12790C_A/C1_13860C_A/C2_02030W_A/C2_02370C_A/C2_02510W_A/C2_04230W_A/C2_04460W_A/C2_04810W_A/C2_05250C_A/C2_05890C_A/C2_05950C_A/C2_05960C_A/C2_05990C_A/C2_…	110
Dal81 and Stp2 co-dependent alkalinization-responsive genes	GO:0043436	oxoacid metabolic process	112/1054	420/5910	0.266667	1.49526	4.90576	1.93551e-06	4.74042e-05	4.3954e-05	C1_00170W_A/C1_01690C_A/C1_02620C_A/C1_02820W_A/C1_02970W_A/C1_03320C_A/C1_03390W_A/C1_04500W_A/C1_05020C_A/C1_05110C_A/C1_05940W_A/C1_08190C_A/C1_08330C_A/C1_08400C_A/C1_08410C_A/C1_09290C_A/C1_09380W_A/C1_09690W_A/C1_10700C_A/C1_11080W_A/C1_11480W_A/C1_12210W_A/C1_12790C_A/C1_13860C_A/C2_02030W_A/C2_02370C_A/C2_02510W_A/C2_04230W_A/C2_04460W_A/C2_04810W_A/C2_05250C_A/C2_05890C_A/C2_05950C_A/C2_…	112
Dal81 and Stp2 co-dependent alkalinization-responsive genes	GO:0006082	organic acid metabolic process	112/1054	421/5910	0.266033	1.4917	4.87682	2.19381e-06	5.28637e-05	4.90162e-05	C1_00170W_A/C1_01690C_A/C1_02620C_A/C1_02820W_A/C1_02970W_A/C1_03320C_A/C1_03390W_A/C1_04500W_A/C1_05020C_A/C1_05110C_A/C1_05940W_A/C1_08190C_A/C1_08330C_A/C1_08400C_A/C1_08410C_A/C1_09290C_A/C1_09380W_A/C1_09690W_A/C1_10700C_A/C1_11080W_A/C1_11480W_A/C1_12210W_A/C1_12790C_A/C1_13860C_A/C2_02030W_A/C2_02370C_A/C2_02510W_A/C2_04230W_A/C2_04460W_A/C2_04810W_A/C2_05250C_A/C2_05890C_A/C2_05950C_A/C2_…	112
Dal81 and Stp2 co-dependent alkalinization-responsive genes	GO:0009073	aromatic amino acid family biosynthetic process	15/1054	25/5910	0.6	3.36433	5.51877	2.92178e-06	6.9288e-05	6.42451e-05	C1_05110C_A/C1_12210W_A/C2_02030W_A/C2_02510W_A/C2_04810W_A/C4_00140C_A/C4_00650W_A/C4_00890W_A/C4_06110C_A/C4_07090C_A/C5_05080W_A/C5_05320C_A/C7_03720C_A/CR_01590C_A/CR_07710W_A	15
Dal81 and Stp2 co-dependent alkalinization-responsive genes	GO:0009064	glutamine family amino acid metabolic process	17/1054	34/5910	0.5	2.80361	4.91335	1.80825e-05	0.000397283	0.000368368	C1_05020C_A/C1_09290C_A/C1_10700C_A/C2_05890C_A/C2_07900W_A/C3_03470W_A/C3_04660C_A/C4_00160C_A/C4_00240C_A/C4_01550C_A/C4_05070C_A/C4_06120W_A/C5_02600W_A/C5_04490C_A/C7_02150C_A/CR_01030W_A/CR_07050C_A	17
Dal81 and Stp2 co-dependent alkalinization-responsive genes	GO:1900247	regulation of cytoplasmic translational elongation	9/1054	12/5910	0.75	4.20541	5.17797	2.32121e-05	0.000488434	0.000452885	C1_12570C_A/C2_01060C_A/C2_05620W_A/C2_05840W_A/C3_06060W_A/C4_00490W_A/C4_00690C_A/C5_03640W_A/C5_03700C_A	9
Dal81 and Stp2 co-dependent alkalinization-responsive genes	GO:0009072	aromatic amino acid metabolic process	18/1054	38/5910	0.473684	2.65605	4.771	2.63901e-05	0.000547595	0.00050774	C1_05110C_A/C1_12210W_A/C2_02030W_A/C2_02510W_A/C2_04810W_A/C3_00260C_A/C4_00140C_A/C4_00650W_A/C4_00890W_A/C4_06110C_A/C4_07090C_A/C5_05080W_A/C5_05320C_A/C7_03720C_A/CR_01590C_A/CR_05440W_A/CR_06860C_A/CR_07710W_A	18
Dal81 and Stp2 co-dependent alkalinization-responsive genes	GO:0044283	small molecule biosynthetic process	89/1054	335/5910	0.265672	1.48968	4.2988	2.74542e-05	0.00056187	0.000520976	C1_00170W_A/C1_01650W_A/C1_02620C_A/C1_02820W_A/C1_02970W_A/C1_03390W_A/C1_05020C_A/C1_05110C_A/C1_08330C_A/C1_08410C_A/C1_09290C_A/C1_09380W_A/C1_09490C_A/C1_11080W_A/C1_12210W_A/C1_12790C_A/C1_13860C_A/C2_02020W_A/C2_02030W_A/C2_02370C_A/C2_02510W_A/C2_02740C_A/C2_04230W_A/C2_04460W_A/C2_04810W_A/C2_05550W_A/C2_05890C_A/C2_06190W_A/C2_07090C_A/C2_07210C_A/C2_08530C_A/C2_09060C_A/C3_02320W_A/C3_…	89
Dal81 and Stp2 co-dependent alkalinization-responsive genes	GO:2000765	regulation of cytoplasmic translation	12/1054	21/5910	0.571429	3.20412	4.7137	5.86495e-05	0.00115293	0.00106901	C1_12570C_A/C2_01060C_A/C2_05620W_A/C2_05840W_A/C2_07210C_A/C3_06060W_A/C4_00490W_A/C4_00690C_A/C5_01910W_A/C5_03250W_A/C5_03640W_A/C5_03700C_A	12
Dal81 and Stp2 co-dependent alkalinization-responsive genes	GO:0001522	pseudouridine synthesis	9/1054	13/5910	0.692308	3.88192	4.84591	6.34813e-05	0.0012317	0.00114206	C1_10620W_A/C1_11550W_A/C2_10270W_A/C5_01180W_A/C5_01610W_A/C6_02350C_A/CR_04110W_A/CR_04360C_A/CR_08020C_A	9
Dal81 and Stp2 co-dependent alkalinization-responsive genes	GO:0018202	peptidyl-histidine modification	8/1054	11/5910	0.727273	4.07797	4.76003	9.88998e-05	0.00184695	0.00171253	C1_09040C_A/C2_01060C_A/C2_05620W_A/C2_05840W_A/C4_00490W_A/C4_00690C_A/C5_03640W_A/C5_03700C_A	8
Dal81 and Stp2 co-dependent alkalinization-responsive genes	GO:0071034	CUT catabolic process	8/1054	11/5910	0.727273	4.07797	4.76003	9.88998e-05	0.00184695	0.00171253	C1_01160C_A/C1_05050C_A/C1_05360C_A/C1_07960W_A/C1_12350W_A/C4_02090C_A/C4_03740W_A/CR_02550C_A	8
Dal81 and Stp2 co-dependent alkalinization-responsive genes	GO:0071043	CUT metabolic process	8/1054	11/5910	0.727273	4.07797	4.76003	9.88998e-05	0.00184695	0.00171253	C1_01160C_A/C1_05050C_A/C1_05360C_A/C1_07960W_A/C1_12350W_A/C4_02090C_A/C4_03740W_A/CR_02550C_A	8
Dal81 and Stp2 co-dependent alkalinization-responsive genes	GO:0009081	branched-chain amino acid metabolic process	12/1054	22/5910	0.545455	3.05848	4.50621	0.0001082	0.00197135	0.00182787	C1_00170W_A/C2_02370C_A/C2_04230W_A/C2_06190W_A/C3_02320W_A/C3_05590C_A/C4_05130C_A/C5_02180C_A/C5_05410C_A/C6_00870C_A/C6_02890C_A/CR_06860C_A	12
Dal81 and Stp2 co-dependent alkalinization-responsive genes	GO:0009082	branched-chain amino acid biosynthetic process	9/1054	14/5910	0.642857	3.60464	4.54538	0.000149628	0.00256947	0.00238246	C1_00170W_A/C2_02370C_A/C2_04230W_A/C2_06190W_A/C3_02320W_A/C3_05590C_A/C5_02180C_A/C5_05410C_A/C6_00870C_A	9
Dal81 and Stp2 co-dependent alkalinization-responsive genes	GO:0043648	dicarboxylic acid metabolic process	17/1054	40/5910	0.425	2.38306	4.08876	0.000234237	0.00388834	0.00360534	C1_01690C_A/C1_10700C_A/C2_02370C_A/C2_05250C_A/C2_05890C_A/C2_07900W_A/C3_03470W_A/C3_07640C_A/C4_00160C_A/C4_00890W_A/C4_05540W_A/C4_06120W_A/C5_02600W_A/CR_00540C_A/CR_07010W_A/CR_07420W_A/CR_07710W_A	17
Dal81 and Stp2 co-dependent alkalinization-responsive genes	GO:0002182	cytoplasmic translational elongation	9/1054	15/5910	0.6	3.36433	4.27119	0.000315009	0.00511548	0.00474316	C1_12570C_A/C2_01060C_A/C2_05620W_A/C2_05840W_A/C3_06060W_A/C4_00490W_A/C4_00690C_A/C5_03640W_A/C5_03700C_A	9
Dal81 and Stp2 co-dependent alkalinization-responsive genes	GO:0016054	organic acid catabolic process	34/1054	108/5910	0.314815	1.76523	3.73899	0.000365296	0.00580587	0.00538331	C1_03320C_A/C1_03390W_A/C1_04500W_A/C1_08190C_A/C1_08330C_A/C1_08400C_A/C1_09690W_A/C1_13860C_A/C2_04230W_A/C2_05250C_A/C2_05950C_A/C2_05960C_A/C2_05990C_A/C2_06190W_A/C2_07260C_A/C2_07900W_A/C3_00810C_A/C3_01930W_A/C3_01960C_A/C3_03470W_A/C4_00160C_A/C4_01550C_A/C4_02020W_A/C4_05130C_A/C5_02600W_A/C5_04440C_A/C5_04490C_A/C6_02890C_A/CR_00150C_A/CR_01030W_A/CR_06860C_A/CR_07050C_A/CR_07730W_A/CR_…	34
Dal81 and Stp2 co-dependent alkalinization-responsive genes	GO:0046395	carboxylic acid catabolic process	34/1054	108/5910	0.314815	1.76523	3.73899	0.000365296	0.00580587	0.00538331	C1_03320C_A/C1_03390W_A/C1_04500W_A/C1_08190C_A/C1_08330C_A/C1_08400C_A/C1_09690W_A/C1_13860C_A/C2_04230W_A/C2_05250C_A/C2_05950C_A/C2_05960C_A/C2_05990C_A/C2_06190W_A/C2_07260C_A/C2_07900W_A/C3_00810C_A/C3_01930W_A/C3_01960C_A/C3_03470W_A/C4_00160C_A/C4_01550C_A/C4_02020W_A/C4_05130C_A/C5_02600W_A/C5_04440C_A/C5_04490C_A/C6_02890C_A/CR_00150C_A/CR_01030W_A/CR_06860C_A/CR_07050C_A/CR_07730W_A/CR_…	34
Dal81 and Stp2 co-dependent alkalinization-responsive genes	GO:0009084	glutamine family amino acid biosynthetic process	11/1054	22/5910	0.5	2.80361	3.94827	0.000568645	0.00875831	0.00812086	C1_05020C_A/C1_09290C_A/C2_05890C_A/C3_04660C_A/C4_00240C_A/C4_01550C_A/C4_05070C_A/C4_06120W_A/C5_02600W_A/C7_02150C_A/CR_01030W_A	11
Dal81 and Stp2 co-dependent alkalinization-responsive genes	GO:0006525	arginine metabolic process	9/1054	16/5910	0.5625	3.15406	4.01929	0.000606576	0.00924719	0.00857416	C1_05020C_A/C1_09290C_A/C3_04660C_A/C4_00160C_A/C4_01550C_A/C4_05070C_A/C5_04490C_A/C7_02150C_A/CR_01030W_A	9
Dal81 and Stp2 co-dependent alkalinization-responsive genes	GO:0044282	small molecule catabolic process	42/1054	146/5910	0.287671	1.61303	3.49411	0.000680593	0.0102708	0.00952324	C1_03320C_A/C1_03390W_A/C1_04500W_A/C1_08190C_A/C1_08330C_A/C1_08400C_A/C1_09690W_A/C1_13860C_A/C2_04230W_A/C2_05250C_A/C2_05950C_A/C2_05960C_A/C2_05990C_A/C2_06190W_A/C2_06830C_A/C2_07260C_A/C2_07900W_A/C3_00810C_A/C3_01930W_A/C3_01960C_A/C3_03470W_A/C3_06340W_A/C3_07340W_A/C3_07440W_A/C4_00160C_A/C4_01550C_A/C4_02020W_A/C4_05130C_A/C4_05300W_A/C5_02600W_A/C5_03900W_A/C5_04120C_A/C5_04440C_A/C5_…	42
Dal81 and Stp2 co-dependent alkalinization-responsive genes	GO:0098656	monoatomic anion transmembrane transport	30/1054	96/5910	0.3125	1.75225	3.46179	0.000909768	0.0135919	0.0126027	C1_02530C_A/C1_05940W_A/C1_06000W_A/C1_07120W_A/C1_10800C_A/C1_11480W_A/C1_12100C_A/C2_06520C_A/C2_06590C_A/C3_02620C_A/C3_03070W_A/C3_03690W_A/C3_04270C_A/C3_04660C_A/C3_05460W_A/C3_05600W_A/C3_06580W_A/C3_06710W_A/C4_01750C_A/C4_05430C_A/C5_03060C_A/C5_03500W_A/C6_00440C_A/C6_00960W_A/C6_01060C_A/C6_01440C_A/CR_00930W_A/CR_03270W_A/CR_09910W_A/CR_09920W_A	30
Dal81 and Stp2 co-dependent alkalinization-responsive genes	GO:0009066	aspartate family amino acid metabolic process	18/1054	50/5910	0.36	2.0186	3.36958	0.00164841	0.0239099	0.0221697	C1_02820W_A/C1_08330C_A/C1_08410C_A/C1_10700C_A/C2_02370C_A/C2_04460W_A/C2_05250C_A/C2_06190W_A/C2_08530C_A/C2_09060C_A/C4_04410C_A/C4_05320W_A/C4_05540W_A/C5_00650C_A/C5_02270W_A/CR_01400W_A/CR_01620C_A/CR_06860C_A	18
Dal81 and Stp2 co-dependent alkalinization-responsive genes	GO:0006526	L-arginine biosynthetic process	7/1054	12/5910	0.583333	3.27087	3.66834	0.00193388	0.0272568	0.025273	C1_05020C_A/C1_09290C_A/C3_04660C_A/C4_01550C_A/C4_05070C_A/C7_02150C_A/CR_01030W_A	7
Dal81 and Stp2 co-dependent alkalinization-responsive genes	GO:0009065	glutamine family amino acid catabolic process	7/1054	12/5910	0.583333	3.27087	3.66834	0.00193388	0.0272568	0.025273	C2_07900W_A/C3_03470W_A/C4_00160C_A/C4_01550C_A/C5_02600W_A/C5_04490C_A/CR_07050C_A	7
Dal81 and Stp2 co-dependent alkalinization-responsive genes	GO:0072350	tricarboxylic acid metabolic process	11/1054	25/5910	0.44	2.46717	3.42465	0.00213472	0.0298062	0.0276369	C1_01690C_A/C2_05890C_A/C3_00880W_A/C3_07640C_A/C4_06610C_A/C5_05280C_A/CR_00540C_A/CR_02360W_A/CR_05180C_A/CR_05790C_A/CR_07420W_A	11
Dal81 and Stp2 co-dependent alkalinization-responsive genes	GO:0006448	regulation of translational elongation	9/1054	19/5910	0.473684	2.65605	3.36816	0.0029357	0.040238	0.0373094	C1_12570C_A/C2_01060C_A/C2_05620W_A/C2_05840W_A/C3_06060W_A/C4_00490W_A/C4_00690C_A/C5_03640W_A/C5_03700C_A	9
Dal81 and Stp2 co-dependent alkalinization-responsive genes	GO:1903825	organic acid transmembrane transport	23/1054	73/5910	0.315068	1.76666	3.07047	0.00309211	0.040658	0.0376988	C1_02530C_A/C1_06000W_A/C1_07120W_A/C1_10800C_A/C1_12100C_A/C3_02620C_A/C3_03690W_A/C3_04270C_A/C3_04660C_A/C3_05460W_A/C3_05600W_A/C3_06580W_A/C4_01750C_A/C4_05430C_A/C5_03060C_A/C5_03500W_A/C6_00960W_A/C6_01060C_A/C6_01440C_A/CR_00930W_A/CR_03270W_A/CR_09910W_A/CR_09920W_A	23
Dal81 and Stp2 co-dependent alkalinization-responsive genes	GO:1905039	carboxylic acid transmembrane transport	23/1054	73/5910	0.315068	1.76666	3.07047	0.00309211	0.040658	0.0376988	C1_02530C_A/C1_06000W_A/C1_07120W_A/C1_10800C_A/C1_12100C_A/C3_02620C_A/C3_03690W_A/C3_04270C_A/C3_04660C_A/C3_05460W_A/C3_05600W_A/C3_06580W_A/C4_01750C_A/C4_05430C_A/C5_03060C_A/C5_03500W_A/C6_00960W_A/C6_01060C_A/C6_01440C_A/CR_00930W_A/CR_03270W_A/CR_09910W_A/CR_09920W_A	23
Dal81 and Stp2 co-dependent alkalinization-responsive genes	GO:1901657	glycosyl compound metabolic process	14/1054	37/5910	0.378378	2.12165	3.18834	0.00312351	0.040658	0.0376988	C1_01150C_A/C1_01650W_A/C1_08410C_A/C1_09490C_A/C2_02510W_A/C2_02740C_A/C2_06830C_A/C3_06340W_A/C5_00680W_A/C5_03790W_A/C5_04570C_A/C6_02290C_A/C7_01570C_A/CR_07050C_A	14
Dal81 and Stp2 co-dependent alkalinization-responsive genes	GO:0006568	L-tryptophan metabolic process	8/1054	16/5910	0.5	2.80361	3.36538	0.00330984	0.040867	0.0378926	C1_12210W_A/C2_02510W_A/C3_00260C_A/C4_06110C_A/C4_07090C_A/CR_01590C_A/CR_05440W_A/CR_06860C_A	8
Dal81 and Stp2 co-dependent alkalinization-responsive genes	GO:0006586	indolalkylamine metabolic process	8/1054	16/5910	0.5	2.80361	3.36538	0.00330984	0.040867	0.0378926	C1_12210W_A/C2_02510W_A/C3_00260C_A/C4_06110C_A/C4_07090C_A/CR_01590C_A/CR_05440W_A/CR_06860C_A	8
Dal81 and Stp2 co-dependent alkalinization-responsive genes	GO:0015976	carbon utilization	8/1054	16/5910	0.5	2.80361	3.36538	0.00330984	0.040867	0.0378926	C1_04500W_A/C1_08190C_A/C1_09690W_A/C2_10540W_A/C4_02020W_A/C4_03940C_A/C5_04440C_A/CR_00200W_A	8
Dal81 and Stp2 co-dependent alkalinization-responsive genes	GO:0042430	indole-containing compound metabolic process	8/1054	16/5910	0.5	2.80361	3.36538	0.00330984	0.040867	0.0378926	C1_12210W_A/C2_02510W_A/C3_00260C_A/C4_06110C_A/C4_07090C_A/CR_01590C_A/CR_05440W_A/CR_06860C_A	8
Dal81 and Stp2 co-dependent alkalinization-responsive genes	GO:1901659	glycosyl compound biosynthetic process	8/1054	16/5910	0.5	2.80361	3.36538	0.00330984	0.040867	0.0378926	C1_01150C_A/C1_01650W_A/C1_09490C_A/C2_02740C_A/C5_03790W_A/C5_04570C_A/C6_02290C_A/CR_07050C_A	8
Dal81 and Stp2 co-dependent alkalinization-responsive genes	GO:0009308	amine metabolic process	16/1054	45/5910	0.355556	1.99367	3.11713	0.00339826	0.0416148	0.0385859	C1_09380W_A/C1_12210W_A/C2_02510W_A/C2_03120W_A/C3_00260C_A/C3_01280W_A/C3_02240C_A/C4_06110C_A/C4_07090C_A/C5_00700C_A/C5_02180C_A/C5_04490C_A/CR_01030W_A/CR_01590C_A/CR_05440W_A/CR_06860C_A	16
Dal81 and Stp2 co-dependent alkalinization-responsive genes	GO:0006566	threonine metabolic process	6/1054	10/5910	0.6	3.36433	3.48594	0.00346454	0.0419301	0.0388783	C1_08330C_A/C2_02370C_A/C2_06190W_A/C4_05540W_A/C5_00650C_A/C5_02270W_A	6
Dal81 and Stp2 co-dependent alkalinization-responsive genes	GO:0006553	lysine metabolic process	7/1054	13/5910	0.538462	3.01927	3.39538	0.00354941	0.0420859	0.0390227	C1_02820W_A/C2_02370C_A/C2_04460W_A/C4_04410C_A/C4_05320W_A/C4_05540W_A/CR_01400W_A	7
Dal81 and Stp2 co-dependent alkalinization-responsive genes	GO:0009085	lysine biosynthetic process	7/1054	13/5910	0.538462	3.01927	3.39538	0.00354941	0.0420859	0.0390227	C1_02820W_A/C2_02370C_A/C2_04460W_A/C4_04410C_A/C4_05320W_A/C4_05540W_A/CR_01400W_A	7
