# Supplementary material for: Coordinated regulation of pH alkalinization by two transcription factors promotes fungal commensalism and pathogenicity
Source: Nat Commun. 2025 Aug 22;16:7855. doi: 10.1038/s41467-025-62953-x (PMC12373999; doi:10.1038/s41467-025-62953-x)
Supplement: Supplementary file 5 — Supplementary Data 3 [file 41467_2025_62953_MOESM5_ESM.xlsx]

## Sheet: Dal81-Myc ChIP sequencing data
Chromosome (start-end)	score	signal Value	p-value (-log10)	q-value (-log10)	gene_ID
chr4:19574-20918	7174	4.88426	722.087	717.49	C4_00130W_A
chr5:856464-857043	6504	4.65312	654.813	650.439	C5_03900W_A
chr3:1721659-1722045	5164	4.1675	520.56	516.461	C3_07550C_A
chr1:2484567-2485514	4634	3.96437	467.461	463.482	C1_11320C_A
chr1:2868434-2869716	3586	3.53712	362.212	358.642	C1_13140C_A
chr2:1608031-1611947	3151	3.348	318.625	315.168	C2_07900W_A
chr7:449473-450987	3094	3.32232	312.857	309.41	C7_02040C_A
chr1:1549698-1551542	2603	3.09585	263.619	260.305	C1_07220W_A
chr1:532140-534225	2376	2.98612	240.855	237.605	C1_02530C_A
chrR:1095366-1096636	2263	2.93009	229.518	226.307	CR_05050W_A
chrR:2122549-2124777	2106	2.85071	213.799	210.655	CR_09920W_A
chr4:223608-225537	1963	2.776	199.38	196.311	C4_01100C_A
chr7:789401-790805	1806	2.69195	183.605	180.61	C7_03560W_A
chrR:1043242-1044127	1763	2.6686	179.309	176.338	CR_04820W_A
chr3:1055712-1057235	1742	2.65692	177.175	174.217	C3_04910C_A
chrR:667330-668672	1498	2.51918	152.727	149.885	CR_02920C_A
chr3:1574865-1575904	1180	2.32539	120.72	118.032	C3_06870W_A
chr2:168066-169314	1151	2.30671	117.789	115.114	C2_01010W_A
chrR:1525895-1526188	1111	2.28103	113.806	111.149	CR_07060C_A
chr2:167235-167479	1061	2.24835	108.814	106.179	C2_01010W_A
chr4:17782-18859	997	2.16573	102.346	99.7428	C4_00120W_A
chr1:2132240-2133961	911	2.14562	93.7034	91.1396	C1_09690W_A
chr1:50459-51713	891	2.13161	91.7126	89.157	C1_00350C_A
chr4:571657-573637	891	2.13161	91.7126	89.157	C4_02740W_A
chr3:808523-810332	817	2.07791	84.2404	81.7197	C3_03870C_A
chr1:1758016-1762722	798	2.0639	82.3332	79.823	C1_08070W_A
chr5:857274-857496	624	1.92849	64.8234	62.409	C5_03910C_A
chr3:708530-709142	568	1.88179	59.1878	56.8128	C3_03370C_A
chr5:992273-992533	559	1.87479	58.3609	55.9921	C5_04560C_A
chr6:206099-207666	543	1.86078	56.7215	54.3654	C6_01060C_A
chr5:1107851-1108951	485	1.80942	50.8786	48.5658	C5_05050W_A
chr1:929106-930760	457	1.78373	48.0578	45.7653	C1_04500W_A
chr1:2383119-2384540	445	1.77206	46.7982	44.5143	C1_10740C_A
chr7:257923-259067	363	1.69268	38.6146	36.3884	C7_01260W_A
chr1:1092308-1093826	330	1.65766	35.2209	33.0236	C1_05160C_A
chr4:1362453-1363862	302	1.62731	32.39	30.217	C4_06120W_A
chr1:898002-899598	295	1.6203	31.7515	29.5838	C1_04330W_A
chr1:1864153-1865428	293	1.61797	31.5399	29.3741	C1_08500C_A
chr4:345952-346992	275	1.59696	29.6636	27.5162	C4_01750C_A
chr7:195097-197733	271	1.59229	29.2535	27.1104	C7_00930W_A
chr3:1387866-1389815	265	1.58528	28.6432	26.507	C3_06100C_A
chr3:707977-708190	263	1.58295	28.441	26.3071	C3_03370C_A
chrR:5784-8733	372	1.56022	39.5094	37.2771	CR_00010C_A
chr5:45838-46251	243	1.5596	26.4541	24.3452	C5_00270W_A
chr6:132058-133140	235	1.55026	25.6774	23.5793	C6_00750C_A
chr6:411478-412597	235	1.55026	25.6774	23.5793	C6_02010C_A
chr1:3074044-3075117	233	1.54793	25.4848	23.3895	C1_13940W_A
chr6:765132-765352	233	1.54793	25.4848	23.3895	C6_03600C_A
chr5:348288-350954	228	1.54092	24.911	22.8243	C5_01580C_A
chr7:364040-364386	220	1.53158	24.155	22.0795	C7_01680C_A
chrR:1576972-1577706	220	1.53158	24.155	22.0795	CR_07240C_A
chr6:903878-904757	218	1.52925	23.9676	21.895	C6_04130C_A
chr1:895132-895916	215	1.52458	23.5948	21.528	C1_04320W_A
chr4:962312-963245	215	1.52458	23.5948	21.528	C4_04490C_A
chr3:1250630-1251683	206	1.51291	22.6744	20.6235	C3_05590C_A
chr4:486139-486562	204	1.51057	22.4923	20.4445	C4_02410C_A
chr3:1795337-1795852	313	1.50741	33.5328	31.3503	C3_07980C_A
chr5:785569-787162	200	1.5059	22.1301	20.0886	C5_03500W_A
chr2:19480-21082	195	1.4989	21.5918	19.5594	C2_00140W_A
chr1:1195184-1196694	193	1.49656	21.4137	19.3846	C1_05730W_A
chr2:2031248-2032089	178	1.47555	19.841	17.8416	C2_09940W_A
chrR:1467841-1469397	161	1.4522	18.158	16.1932	CR_06860C_A
chrR:1274170-1275063	157	1.4452	17.6665	15.7121	CR_06000W_A
chrR:182065-184155	157	1.4452	17.6665	15.7121	CR_00780C_A
chr2:675934-676437	155	1.44286	17.504	15.5531	C2_03270W_A
chr1:1526925-1527789	150	1.43586	17.0208	15.0802	C1_07120W_A
chr2:2198951-2202103	150	1.43586	17.0208	15.0802	C2_10690W_A
chrR:4562-5407	221	1.42827	24.1939	22.1184	CR_00010C_A
chr4:25947-27130	144	1.42652	16.3862	14.4598	C4_00160C_A
chr5:1170299-1171191	143	1.42419	16.2294	14.3064	C5_05410C_A
chr4:1457723-1458651	138	1.41718	15.7629	13.8509	C4_06540W_A
chr5:917168-918123	137	1.41485	15.6088	13.7004	C5_04110W_A
chr3:292227-293193	138	1.41441	15.7499	13.8412	C3_01360C_A
chr3:571506-572723	132	1.40784	15.1508	13.253	C3_02640C_A
chr3:1702030-1703005	131	1.40551	14.9995	13.1055	C3_07440W_A
chr5:429668-430234	129	1.40317	14.8489	12.9585	C5_01910W_A
chr6:39935-40397	129	1.40317	14.8489	12.9585	C6_00290W_A
chrR:1947538-1949061	126	1.3985	14.55	12.6667	CR_09120C_A
chrR:1878170-1878632	125	1.39617	14.4015	12.522	CR_08720W_A
chr7:295853-296811	122	1.3915	14.1068	12.2348	C7_01430C_A
chr3:951316-951924	118	1.3845	13.6701	11.8097	C3_04530C_A
chr3:568820-569628	113	1.37749	13.2399	11.3914	C3_02630C_A
chr7:377221-377642	113	1.37749	13.2399	11.3914	C7_01760C_A
chr3:1741825-1742864	112	1.37516	13.098	11.2534	C3_07640C_A
chr4:716850-717193	112	1.37516	13.098	11.2534	C4_03430W_A
chr2:1158307-1159958	111	1.37282	12.9567	11.1162	C2_05670C_A
chr2:2020342-2021346	111	1.37282	12.9567	11.1162	C2_09880C_A
chr3:1030787-1036249	111	1.37282	12.9567	11.1162	C3_04830C_A
chr6:41013-41907	111	1.37282	12.9567	11.1162	C6_00290W_A
chr3:1776114-1776626	105	1.36348	12.399	10.5752	C3_07830W_A
chr7:691376-691832	104	1.36115	12.2614	10.4416	C7_03180C_A
chr3:28245-29998	103	1.35881	12.1245	10.3087	C3_00220W_A
chrR:369100-370686	101	1.35648	11.9883	10.1767	CR_01620C_A
chr1:28477-29417	100	1.35414	11.8529	10.0456	C1_00160C_A
chr2:706132-706407	100	1.35414	11.8529	10.0456	C2_03390C_A
chr6:8875-9441	100	1.35414	11.8529	10.0456	C6_00070C_A
chr3:949889-950413	99	1.35181	11.7182	9.91513	C3_04530C_A
chr4:970593-971358	97	1.34947	11.5843	9.78547	C4_04530C_A
chr4:1008589-1009036	92	1.34014	11.0558	9.27408	C4_04710W_A
chr5:35173-35886	92	1.34014	11.0558	9.27408	C5_00210C_A
chrR:1805691-1806678	88	1.33313	10.6672	8.89836	CR_08340W_A
chrR:1922036-1922605	87	1.3308	10.5392	8.77474	CR_08990C_A
chr1:3045912-3047115	86	1.32846	10.4119	8.65212	C1_13860C_A
chr4:1468118-1469537	85	1.32613	10.2853	8.53009	C4_06570C_A
chr4:23994-24750	85	1.32613	10.2853	8.53009	C4_00140C_A
chr5:245194-245559	85	1.32613	10.2853	8.53009	C5_01100C_A
chr1:1534872-1535369	84	1.32379	10.1595	8.40881	C1_07160C_A
chr1:1826688-1828839	84	1.32379	10.1595	8.40881	C1_08320W_A
chr2:1332996-1333234	84	1.32379	10.1595	8.40881	C2_06570C_A
chr1:1459738-1460340	82	1.32146	10.0344	8.28848	C1_06850W_A
chr1:710019-712019	82	1.32146	10.0344	8.28848	C1_03380W_A
chr3:1707849-1708128	81	1.31912	9.91013	8.16885	C3_07470W_A
chr6:425017-425573	81	1.31912	9.91013	8.16885	C6_02080W_A
chr4:717724-718498	80	1.31679	9.78656	8.04988	C4_03430W_A
chr6:182768-183015	80	1.31679	9.78656	8.04988	C6_00920W_A
chr7:53260-53669	80	1.31679	9.78656	8.04988	C7_00330C_A
chr1:1829356-1829975	79	1.31445	9.66374	7.93157	C1_08330C_A
chr1:2955779-2956129	79	1.31445	9.66374	7.93157	C1_13480W_A
chr2:1506911-1508766	79	1.31445	9.66374	7.93157	C2_07380W_A
chr7:317738-318668	79	1.31445	9.66374	7.93157	C7_01510W_A
chr1:1847718-1849351	78	1.31212	9.54167	7.81408	C1_08400C_A
chr4:1497834-1498577	76	1.30978	9.42036	7.69746	C4_06720W_A
chr3:911242-911473	75	1.30745	9.2998	7.58158	C3_04380C_A
chr1:1528064-1528649	73	1.30278	9.06094	7.35206	C1_07120W_A
chr1:564183-564379	73	1.30278	9.06094	7.35206	C1_02700C_A
chr2:1165407-1166870	73	1.30278	9.06094	7.35206	C2_05700W_A
chr4:867701-868135	73	1.30278	9.06094	7.35206	C4_04050C_A
chr6:77666-78607	73	1.30278	9.06094	7.35206	C6_00440C_A
chr7:19975-20282	71	1.29811	8.82511	7.12575	C7_00160C_A
chrR:49828-51192	70	1.29578	8.70833	7.01395	CR_00200W_A
chr6:670130-670752	69	1.29344	8.59231	6.90297	C6_03180C_A
chr1:737072-737340	67	1.29111	8.47706	6.79276	C1_03490W_A
chr3:431033-431495	67	1.29111	8.47706	6.79276	C3_01960C_A
chrR:1004540-1005466	67	1.29111	8.47706	6.79276	CR_04590C_A
chr5:34455-34754	66	1.28877	8.36256	6.68331	C5_00210C_A
chr3:832494-834283	65	1.28644	8.24883	6.57487	C3_04000C_A
chr6:1026334-1026783	65	1.28644	8.24883	6.57487	C6_04620C_A
chr1:2957273-2957490	64	1.2841	8.13586	6.46718	C1_13480W_A
chrR:686015-686434	64	1.2841	8.13586	6.46718	CR_02980C_A
chr2:707321-708838	63	1.28177	8.02366	6.36031	C2_03390C_A
chr3:159546-160164	63	1.28177	8.02366	6.36031	C3_00810C_A
chr5:244309-244650	63	1.28177	8.02366	6.36031	C5_01100C_A
chr5:982000-982558	62	1.27943	7.91223	6.25436	C5_04490C_A
chrR:1922815-1923010	62	1.27943	7.91223	6.25436	CR_08990C_A
chr1:411445-412362	61	1.2771	7.80156	6.14925	C1_01990W_A
chr5:87592-87973	61	1.2771	7.80156	6.14925	C5_00480C_A
chr6:839186-839483	61	1.2771	7.80156	6.14925	C6_03850C_A
chrR:39303-39607	61	1.2771	7.80156	6.14925	CR_00150C_A
chr2:1890004-1890401	59	1.27243	7.58253	5.94147	C2_09220W_A
chr6:170364-171252	59	1.27243	7.58253	5.94147	C6_00870C_A
chrR:937337-937589	59	1.27243	7.58253	5.94147	CR_04190W_A
chr1:3108177-3108717	58	1.27009	7.47418	5.83896	C1_14120C_A
chrR:1753696-1754446	58	1.27009	7.47418	5.83896	CR_08020C_A
chr1:1232208-1232681	57	1.26776	7.36659	5.7372	C1_05910W_A
chr7:430977-431222	56	1.26542	7.25978	5.63621	C7_01990C_A
chr1:1454084-1454765	55	1.26309	7.15374	5.53607	C1_06810W_A
chr4:1007855-1008247	55	1.26309	7.15374	5.53607	C4_04700W_A
chrR:1317839-1318236	55	1.26309	7.15374	5.53607	CR_06140W_A
chr1:909604-909853	54	1.26075	7.04847	5.43672	C1_04390C_A
chr1:2050134-2050749	53	1.25842	6.94399	5.33821	C1_09320C_A
chr3:778476-779080	52	1.25609	6.84028	5.24051	C3_03690W_A
chr5:15683-16047	52	1.25609	6.84028	5.24051	C5_00140C_A
chr5:994990-995193	52	1.25609	6.84028	5.24051	C5_04570C_A
chr1:2522800-2523372	49	1.24908	6.53382	4.95263	C1_11480W_A
chr1:343427-343772	49	1.24908	6.53382	4.95263	C1_01690C_A
chr3:158202-158559	49	1.24908	6.53382	4.95263	C3_00810C_A
chr5:994090-994373	49	1.24908	6.53382	4.95263	C5_04570C_A
chr7:713980-714212	49	1.24908	6.53382	4.95263	C7_03280C_A
chrR:1839703-1840079	49	1.24908	6.53382	4.95263	CR_08510W_A
chrR:1911731-1912722	49	1.24908	6.53382	4.95263	CR_08920W_A
chr6:810763-811903	48	1.24675	6.43323	4.85836	C6_03760C_A
chrR:1906306-1906573	48	1.24675	6.43323	4.85836	CR_08880C_A
chr3:570646-570857	46	1.24208	6.2344	4.67186	C3_02630C_A
chr4:399066-399456	45	1.23974	6.13615	4.57989	C4_02020W_A
chr1:2557144-2557398	44	1.23741	6.0387	4.48869	C1_11670W_A
chr1:911720-912317	44	1.23741	6.0387	4.48869	C1_04390C_A
chr2:165773-166050	44	1.23741	6.0387	4.48869	C2_01010W_A
chr1:233359-234190	43	1.23507	5.94203	4.3984	C1_01150C_A
chrR:1838835-1839259	43	1.23507	5.94203	4.3984	CR_08510W_A
chr2:1232715-1233074	43	1.23274	5.84615	4.30887	C2_06020W_A
chr3:31290-31484	43	1.23274	5.84615	4.30887	C3_00240C_A
chr5:43645-44381	43	1.23274	5.84615	4.30887	C5_00260W_A
chr5:794992-795237	43	1.23274	5.84615	4.30887	C5_03550W_A
chr5:780851-781107	42	1.2304	5.75106	4.22006	C5_03470C_A
chr3:1245342-1245536	41	1.22807	5.65676	4.13218	C3_05570W_A
chr5:53531-53726	41	1.22807	5.65676	4.13218	C5_00310C_A
chr2:308376-308567	40	1.22573	5.56324	4.04507	C2_01700C_A
chr5:189537-190631	40	1.22573	5.56324	4.04507	C5_00800C_A
chr5:581189-581540	40	1.22573	5.56324	4.04507	C5_02600W_A
chrR:968768-968997	40	1.22573	5.56324	4.04507	CR_04360C_A
chr3:159008-159354	39	1.2234	5.47052	3.95879	C3_00810C_A
chr4:1588569-1589093	39	1.2234	5.47052	3.95879	C4_07200C_A
chr4:159352-159609	39	1.2234	5.47052	3.95879	C4_00890W_A
chrR:2265803-2266112	39	1.2234	5.47052	3.95879	CR_10690W_A
chr2:2171277-2171694	38	1.22106	5.3786	3.87343	C2_10540W_A
chr3:1042154-1042541	38	1.22106	5.3786	3.87343	C3_04860W_A
chr1:30349-31106	37	1.21873	5.28746	3.78911	C1_00170W_A
chr2:2172199-2172450	37	1.2164	5.19712	3.70543	C2_10540W_A
chr5:891621-891877	36	1.21406	5.10757	3.62259	C5_04030W_A
chr6:191310-191577	36	1.21406	5.10757	3.62259	C6_00960W_A
chr7:411117-411390	36	1.21406	5.10757	3.62259	C7_01920W_A
chr4:21336-22640	35	1.21173	5.01882	3.54061	C4_00140C_A
chr5:977326-977810	35	1.21173	5.01882	3.54061	C5_04440C_A
chrR:982160-982352	35	1.21173	5.01882	3.54061	CR_04440C_A
chrR:403920-404120	33	1.20706	4.84372	3.37922	CR_01780W_A
chr3:1765986-1766534	32	1.20472	4.75736	3.29969	C3_07750W_A
chr5:1152656-1153017	32	1.20472	4.75736	3.29969	C5_05310W_A
chrR:425964-426242	32	1.20472	4.75736	3.29969	CR_01930C_A
chr1:3039011-3039271	32	1.20239	4.67181	3.22131	C1_13820C_A
chr1:598194-598649	32	1.20239	4.67181	3.22131	C1_02840W_A
chr7:924855-925248	32	1.20239	4.67181	3.22131	C7_04240C_A
chrR:1750655-1751128	32	1.20239	4.67181	3.22131	CR_08000C_A
chrR:2199639-2199830	32	1.20239	4.67181	3.22131	CR_10320W_A
chr1:1120426-1120643	31	1.20005	4.58705	3.14352	C1_05330C_A
chr5:1156126-1156308	31	1.20005	4.58705	3.14352	C5_05340W_A
chr5:783880-784081	31	1.20005	4.58705	3.14352	C5_03490C_A
chr6:124599-125110	31	1.20005	4.58705	3.14352	C6_00720C_A
chrR:2264432-2264683	31	1.20005	4.58705	3.14352	CR_10690W_A
chr1:1105780-1105974	30	1.19772	4.5031	3.06681	C1_05240C_A
chr3:943651-943841	30	1.19772	4.5031	3.06681	C3_04510W_A
chr2:1983823-1984122	29	1.19538	4.41995	2.9908	C2_09710C_A
chr4:606575-606977	29	1.19538	4.41995	2.9908	C4_02940W_A
chr5:920177-920380	29	1.19538	4.41995	2.9908	C5_04120C_A
chr7:925901-926271	29	1.19538	4.41995	2.9908	C7_04240C_A
chrR:2254817-2255043	29	1.19538	4.41995	2.9908	CR_10650W_A
chr1:530353-530937	29	1.19305	4.33759	2.9158	C1_02520W_A
chr1:598909-599108	29	1.19305	4.33759	2.9158	C1_02840W_A
chrR:1833120-1833379	29	1.19305	4.33759	2.9158	CR_08490W_A
chr1:2600242-2600687	28	1.19071	4.25605	2.84162	C1_11870W_A
chr4:30855-31162	27	1.18838	4.17531	2.76821	C4_00200C_A
chr5:281617-282325	27	1.18838	4.17531	2.76821	C5_01250W_A
chr2:827240-827536	26	1.18604	4.09538	2.6957	C2_03940C_A
chr4:1546249-1546433	26	1.18371	4.01625	2.6242	C4_06970C_A
chr7:52112-52324	26	1.18371	4.01625	2.6242	C7_00330C_A
chrR:336172-336481	26	1.18371	4.01625	2.6242	CR_01430W_A
chrR:562055-562706	26	1.18371	4.01625	2.6242	CR_02530W_A
chr6:192183-192365	25	1.18137	3.93793	2.5536	C6_00960W_A
chr7:857402-857650	25	1.18137	3.93793	2.5536	C7_03880C_A
chr2:1049235-1049486	24	1.17904	3.86042	2.484	C2_05070W_A
chr2:34378-34566	24	1.17904	3.86042	2.484	C2_00260C_A
chr5:1169694-1170060	24	1.17904	3.86042	2.484	C5_05410C_A
chrR:1194442-1194702	24	1.17904	3.86042	2.484	CR_05610C_A
chrR:2263288-2263858	24	1.17904	3.86042	2.484	CR_10690W_A
chrR:1444080-1444340	24	1.1767	3.78371	2.41521	CR_06720W_A
chrR:1879203-1879405	24	1.1767	3.78371	2.41521	CR_08720W_A
chr7:390421-390608	23	1.17437	3.70782	2.34736	C7_01810W_A
chr1:2091210-2091573	22	1.17204	3.63273	2.28037	C1_09490C_A
chr3:32140-32419	22	1.1697	3.55845	2.21417	C3_00240C_A
chr5:475210-475427	22	1.1697	3.55845	2.21417	C5_02130W_A
chrR:1609789-1610083	22	1.1697	3.55845	2.21417	CR_07420W_A
chr1:699049-699347	21	1.16737	3.48499	2.14887	C1_03350C_A
chrR:332580-332877	21	1.16737	3.48499	2.14887	CR_01400W_A
chr1:2044867-2045280	20	1.16503	3.41234	2.08445	C1_09300C_A
chr1:2051351-2051621	20	1.16503	3.41234	2.08445	C1_09320C_A
chr1:911348-911535	20	1.16503	3.41234	2.08445	C1_04390C_A
chr2:2207808-2207988	20	1.16503	3.41234	2.08445	C2_10740C_A
chr4:82332-82542	20	1.16503	3.41234	2.08445	C4_00480W_A
chr6:671535-671728	20	1.16503	3.41234	2.08445	C6_03180C_A
chr2:1470066-1470336	20	1.1627	3.3405	2.02103	C2_07210C_A
chr4:113876-114186	20	1.1627	3.3405	2.02103	C4_00670W_A
chrR:53003-53373	20	1.1627	3.3405	2.02103	CR_00210W_A
chr2:2208875-2209400	19	1.16036	3.26947	1.95837	C2_10740C_A
chr5:949492-949672	19	1.16036	3.26947	1.95837	C5_04280C_A
chr1:1179688-1180050	18	1.15803	3.19926	1.89645	C1_05630C_A
chr6:838560-838739	18	1.15803	3.19926	1.89645	C6_03850C_A
chr2:881148-881385	18	1.15569	3.12986	1.83532	C2_04200W_A
chrR:1946378-1946559	17	1.15336	3.06127	1.77506	CR_09120C_A
chr1:1900522-1900800	17	1.15102	2.9935	1.71561	C1_08710W_A
chr3:1773249-1773611	17	1.15102	2.9935	1.71561	C3_07800C_A
chr1:3088257-3088437	16	1.14869	2.92654	1.65698	C1_14020W_A
chr2:1302680-1302865	16	1.14869	2.92654	1.65698	C2_06400C_A
chr2:2174031-2174229	16	1.14869	2.92654	1.65698	C2_10540W_A
chr2:1487511-1487860	15	1.14402	2.79508	1.54225	C2_07320W_A
chrR:1677908-1678129	14	1.14168	2.73057	1.48594	CR_07730W_A
chr4:1459120-1459322	13	1.13701	2.604	1.37634	C4_06540W_A
chr5:910892-911222	13	1.13701	2.604	1.37634	C5_04080C_A
chr4:681025-681358	13	1.13468	2.54194	1.32292	C4_03270W_A
chrR:1316732-1316977	13	1.13468	2.54194	1.32292	CR_06140W_A
chrR:1735959-1736172	13	1.13468	2.54194	1.32292	CR_07950W_A

## Sheet: Stp2-HA ChIP sequencing data
Chromosome (start-end)	score	signal Value	p-value (-log10)	q-value (-log10)	gene_ID
chr5:856483-857513	2742	3.05936	277.368	274.228	C5_03900W_A
chr1:2315005-2316429	2610	3.05136	264.138	261.011	C1_10450W_A
chr2:1608042-1611920	2371	2.93902	240.253	237.152	C2_07900W_A
chrR:49588-51773	2051	2.78173	208.215	205.185	CR_00200W_A
chr3:1574918-1576011	1941	2.72555	197.183	194.187	C3_06870W_A
chr5:580911-582424	1716	2.60647	174.541	171.6	C5_02600W_A
chr1:1846272-1849401	1637	2.56377	166.678	163.766	C1_08400C_A
chr4:217034-219157	1488	2.48064	151.76	148.896	C4_01070W_A
chr4:480515-481291	1591	2.3914	162.045	159.153	C4_02390W_A
chr5:981504-982790	1234	2.33009	126.127	123.412	C5_04490C_A
chrR:368240-371013	1230	2.32784	125.759	123.046	CR_01620C_A
chr1:1195226-1197230	1154	2.28066	118.114	115.45	C1_05730W_A
chr1:541419-542652	1119	2.25819	114.54	111.901	C1_02590C_A
chr4:864690-866495	1104	2.2492	113.122	110.494	C4_04030W_A
chr1:536233-536623	1018	2.19303	104.419	101.857	C1_02540C_A
chr6:205663-207678	1008	2.18629	103.393	100.84	C6_01060C_A
chrR:1019876-1020464	766	2.01776	79.0821	76.666	CR_04690C_A
chrR:2122656-2124722	689	1.95934	71.276	68.9096	CR_09920W_A
chr5:347739-350866	620	1.90542	64.3678	62.0481	C5_01580C_A
chr3:1096241-1097371	557	1.85374	58.0229	55.7475	C3_05090C_A
chr2:2030922-2032118	499	1.8043	52.2131	49.986	C2_09940W_A
chr1:1549784-1551403	487	1.79307	50.9288	48.7134	C1_07220W_A
chr5:1107868-1109000	477	1.78408	49.911	47.7052	C5_05050W_A
chrR:1467701-1469375	462	1.7706	48.4007	46.2087	CR_06860C_A
chr2:1365256-1365871	473	1.74507	49.5241	47.3228	C2_06680W_A
chr3:1056153-1057058	438	1.73227	45.9879	43.8193	C3_04910C_A
chr7:258028-259498	381	1.6942	40.2194	38.1069	C7_01260W_A
chr4:345732-347000	376	1.68971	39.7585	37.6501	C4_01750C_A
chrR:525495-526841	334	1.64702	35.4948	33.4276	CR_02360W_A
chr1:532375-534090	327	1.64028	34.8408	32.7804	C1_02530C_A
chr1:1527026-1528993	323	1.63578	34.4078	32.3521	C1_07120W_A
chrR:127126-128169	319	1.63129	33.9772	31.9261	CR_00540C_A
chr4:962380-963382	308	1.62005	32.9109	30.8715	C4_04490C_A
chr1:1952281-1953143	304	1.61556	32.4886	30.4538	C1_08960W_A
chr3:991380-992419	292	1.60208	31.2361	29.2146	C3_04660C_A
chr1:3074067-3075225	290	1.59983	31.0294	29.0102	C1_13940W_A
chrR:1507233-1509903	277	1.58635	29.8023	27.7971	CR_07010W_A
chr1:2406631-2407577	271	1.57961	29.1969	27.1985	C1_10880W_A
chr1:3045903-3047262	270	1.57736	28.9963	27.0003	C1_13860C_A
chr6:170040-171271	256	1.56163	27.6095	25.6299	C6_00870C_A
chr5:627390-627856	252	1.55714	27.2189	25.244	C5_02790C_A
chr1:2848511-2849698	248	1.55264	26.8307	24.8607	C1_13080W_A
chr1:3108098-3108784	246	1.5504	26.6376	24.6701	C1_14120C_A
chr1:530221-531674	233	1.53467	25.3029	23.3529	C1_02520W_A
chrR:4589-5415	324	1.53117	34.4824	32.4265	CR_00010C_A
chrR:1609257-1610874	222	1.52119	24.1835	22.2477	CR_07420W_A
chr6:87384-88035	209	1.50546	22.9064	20.9877	C6_00480C_A
chr4:20128-23107	208	1.50321	22.7265	20.8104	C4_00130W_A
chrR:1316701-1318405	205	1.49241	22.452	20.5406	CR_06140W_A
chr3:292253-292609	207	1.4919	22.6956	20.7815	C3_01360C_A
chr2:2171339-2178896	195	1.48748	21.4853	19.5865	C2_10540W_A
chrR:2283546-2284313	185	1.474	20.4466	18.5629	CR_10840C_A
chr4:923096-925168	182	1.46951	20.1056	18.2274	C4_04320W_A
chr6:424894-425679	182	1.46951	20.1056	18.2274	C6_02080W_A
chr1:1477141-1479132	169	1.45153	18.7679	16.9125	C1_06930W_A
chr2:740835-742315	164	1.43524	18.3392	16.4927	C2_03520C_A
chrR:510555-511219	156	1.43356	17.4726	15.6419	CR_02280W_A
chr3:175453-178299	153	1.42906	17.1555	15.3312	C3_00880W_A
chr6:13940-14994	153	1.42906	17.1555	15.3312	C6_00120W_A
chr2:2205868-2208162	151	1.42682	16.9979	15.177	C2_10740C_A
chr4:30691-31913	151	1.42682	16.9979	15.177	C4_00200C_A
chr4:1478155-1479977	150	1.42457	16.841	15.0234	C4_06610C_A
chr6:1025410-1026845	148	1.42232	16.6848	14.8705	C6_04620C_A
chr2:2209045-2210327	144	1.41558	16.2202	14.4161	C2_10740C_A
chr6:8512-9855	144	1.41558	16.2202	14.4161	C6_00070C_A
chrR:2106214-2107211	144	1.41558	16.2202	14.4161	CR_09880W_A
chr5:244232-244618	132	1.39761	15.0112	13.2368	C5_01100C_A
chr1:1829413-1829927	130	1.39536	14.8632	13.0925	C1_08330C_A
chr3:28371-30017	130	1.39536	14.8632	13.0925	C3_00220W_A
chrR:982064-982404	129	1.39311	14.7158	12.9489	CR_04440C_A
chr4:1007736-1009095	121	1.37963	13.8461	12.1022	C4_04700W_A
chr1:2132404-2133881	119	1.37738	13.7036	11.9637	C1_09690W_A
chrR:1119539-1120289	120	1.37698	13.7428	12.0027	CR_05180C_A
chr2:1497574-1498131	118	1.37514	13.5618	11.8257	C2_07340W_A
chr4:1586973-1589479	116	1.37289	13.4207	11.6886	C4_07200C_A
chr2:1302315-1303276	112	1.36615	13.0015	11.2815	C2_06400C_A
chr3:1795459-1795851	206	1.36325	22.5912	20.6774	C3_07980C_A
chr1:697413-699211	110	1.36165	12.7255	11.0138	C1_03350C_A
chr2:1507179-1508827	108	1.35941	12.5886	10.881	C2_07380W_A
chr3:1387872-1389659	108	1.35941	12.5886	10.881	C3_06100C_A
chr1:30031-31230	103	1.35042	12.0479	10.3567	C1_00170W_A
chr3:1774049-1775107	102	1.34817	11.9145	10.2275	C3_07800C_A
chr5:34658-35865	102	1.34817	11.9145	10.2275	C5_00210C_A
chrR:1796942-1799606	98	1.34143	11.5185	9.84432	CR_08300C_A
chr5:1169004-1171093	95	1.33694	11.2581	9.59265	C5_05410C_A
chrR:1877250-1878703	95	1.33694	11.2581	9.59265	CR_08720W_A
chr2:1053775-1054112	94	1.33469	11.1289	9.46788	C2_05090W_A
chr5:45919-46274	94	1.33469	11.1289	9.46788	C5_00270W_A
chr1:199846-201714	93	1.33244	11.0005	9.34399	C1_00990C_A
chr3:1246779-1248448	93	1.33244	11.0005	9.34399	C3_05580C_A
chr1:2393601-2394750	92	1.3302	10.8728	9.22074	C1_10800C_A
chr3:1686131-1687033	92	1.3302	10.8728	9.22074	C3_07330W_A
chr1:342988-343743	88	1.32346	10.494	8.85518	C1_01690C_A
chr3:1250645-1251230	88	1.32346	10.494	8.85518	C3_05590C_A
chrR:1257057-1257305	87	1.32121	10.3691	8.73492	CR_05990C_A
chrR:2241727-2242438	87	1.32121	10.3691	8.73492	CR_10550W_A
chr1:1096525-1096829	85	1.31767	10.1985	8.57296	C1_05170C_A
chr1:1826807-1828542	82	1.31222	9.877	8.26118	C1_08320W_A
chr6:960069-960393	86	1.31021	10.2277	8.60205	C6_04350C_A
chrR:5789-6765	136	1.3097	15.4356	13.6532	CR_00010C_A
chr3:187742-188239	80	1.30773	9.63527	8.02891	C3_00920W_A
chr5:803433-803934	80	1.30773	9.63527	8.02891	C5_03600W_A
chrR:1256351-1256733	80	1.30773	9.63527	8.02891	CR_05990C_A
chr1:2534089-2534366	77	1.30323	9.39645	7.79949	C1_11530C_A
chrR:1226095-1227581	77	1.30323	9.39645	7.79949	CR_05790C_A
chr1:710167-711828	76	1.30099	9.27813	7.6858	C1_03380W_A
chrR:959436-959819	76	1.30099	9.27813	7.6858	CR_04300W_A
chr2:1030086-1031371	75	1.29874	9.16054	7.57291	C2_04940C_A
chr4:326401-326900	75	1.29874	9.16054	7.57291	C4_01600C_A
chr5:785669-787144	75	1.29874	9.16054	7.57291	C5_03500W_A
chrR:1343430-1344154	73	1.29425	8.92756	7.34961	CR_06330C_A
chrR:562445-563627	73	1.29425	8.92756	7.34961	CR_02530W_A
chr6:960859-961633	75	1.29232	9.17706	7.58935	C6_04350C_A
chr6:10730-11278	72	1.292	8.81217	7.23907	C6_00080C_A
chr2:1307307-1307969	69	1.28526	8.4704	6.912	C2_06420C_A
chr3:943557-943913	69	1.28526	8.4704	6.912	C3_04510W_A
chr5:486290-487035	69	1.28526	8.4704	6.912	C5_02180C_A
chr2:1246953-1247316	66	1.28076	8.24623	6.69785	C2_06100W_A
chr6:1009837-1010821	66	1.28076	8.24623	6.69785	C6_04530C_A
chr6:160981-161228	66	1.28076	8.24623	6.69785	C6_00830C_A
chr3:1042126-1042553	75	1.2765	9.09138	7.50838	C3_04860W_A
chr3:1702057-1702999	63	1.27402	7.91553	6.38265	C3_07440W_A
chr5:994998-995360	63	1.27402	7.91553	6.38265	C5_04570C_A
chr7:900847-901982	63	1.27402	7.91553	6.38265	C7_04180W_A
chrR:1519259-1520213	62	1.27178	7.80678	6.27927	CR_07050C_A
chrR:211114-212642	75	1.27118	9.18349	7.59573	CR_00930W_A
chr1:1470687-1470977	61	1.26953	7.69877	6.17668	C1_06900C_A
chr4:160455-161443	61	1.26953	7.69877	6.17668	C4_00890W_A
chr5:7036-8491	61	1.26953	7.69877	6.17668	C5_00060C_A
chr6:857556-859151	61	1.26953	7.69877	6.17668	C6_03960W_A
chrR:832238-832662	61	1.26953	7.69877	6.17668	CR_03720W_A
chrR:1749672-1750838	60	1.26728	7.59151	6.07477	CR_08000C_A
chr4:212871-213534	59	1.26503	7.48499	5.97384	C4_01070W_A
chr1:1453761-1454688	58	1.26279	7.37921	5.87368	C1_06810W_A
chr2:1239731-1240567	58	1.26279	7.37921	5.87368	C2_06070W_A
chr6:496340-497600	57	1.26054	7.27419	5.77429	C6_02390W_A
chr6:834088-834835	57	1.26054	7.27419	5.77429	C6_03840C_A
chr7:42570-42864	57	1.26054	7.27419	5.77429	C7_00280W_A
chr4:867721-867993	56	1.25829	7.16991	5.67568	C4_04050C_A
chrR:2107564-2108657	64	1.25072	7.97505	6.44185	CR_09880W_A
chr2:1233427-1233703	51	1.24706	6.65977	5.1936	C2_06020W_A
chrR:168171-168937	51	1.24706	6.65977	5.1936	CR_00680W_A
chr1:1515679-1515975	50	1.24481	6.56	5.09935	C1_07090C_A
chr1:28350-29397	50	1.24481	6.56	5.09935	C1_00160C_A
chrR:1521501-1521764	50	1.24481	6.56	5.09935	CR_07050C_A
chrR:39144-40032	50	1.24481	6.56	5.09935	CR_00150C_A
chr1:50955-51407	50	1.24257	6.46098	5.00618	C1_00350C_A
chr4:17881-18300	50	1.24257	6.46098	5.00618	C4_00120W_A
chr6:284914-285507	50	1.24257	6.46098	5.00618	C6_01430C_A
chr7:195841-196291	50	1.24257	6.46098	5.00618	C7_00930W_A
chrR:1801316-1801976	50	1.24257	6.46098	5.00618	CR_08310C_A
chr1:1177916-1180122	49	1.24032	6.36272	4.91367	C1_05630C_A
chr1:929723-930519	49	1.24032	6.36272	4.91367	C1_04500W_A
chr3:850396-850670	49	1.24032	6.36272	4.91367	C3_04070C_A
chrR:7076-7560	99	1.23811	11.5817	9.90721	CR_00010C_A
chr3:778593-779040	48	1.23807	6.26522	4.82198	C3_03690W_A
chrR:933550-934100	47	1.23582	6.16847	4.73133	CR_04170W_A
chr2:1054456-1055011	46	1.23358	6.07249	4.64139	C2_05090W_A
chr3:1766002-1766559	46	1.23358	6.07249	4.64139	C3_07750W_A
chr4:548569-548836	46	1.23358	6.07249	4.64139	C4_02640C_A
chrR:425943-426275	46	1.23358	6.07249	4.64139	CR_01930C_A
chr4:398895-399159	44	1.22908	5.88279	4.4638	C4_02020W_A
chr7:41932-42218	44	1.22908	5.88279	4.4638	C7_00280W_A
chrR:332543-333009	44	1.22908	5.88279	4.4638	CR_01400W_A
chr3:159097-160033	43	1.22684	5.78909	4.37627	C3_00810C_A
chr6:88527-89103	43	1.22684	5.78909	4.37627	C6_00480C_A
chrR:1834272-1834581	42	1.22459	5.69614	4.28956	CR_08500W_A
chrR:889837-890123	42	1.22459	5.69614	4.28956	CR_03920C_A
chr4:1009872-1010602	42	1.22234	5.60396	4.20376	C4_04710W_A
chr3:1041394-1041863	41	1.22091	5.58499	4.19063	C3_04860W_A
chr1:577290-577563	41	1.2201	5.51254	4.11862	C1_02740C_A
chr3:448610-448895	41	1.2201	5.51254	4.11862	C3_02060W_A
chrR:879379-879826	41	1.2201	5.51254	4.11862	CR_03890W_A
chr1:1476176-1476839	40	1.21785	5.42189	4.03421	C1_06930W_A
chr3:1746422-1747130	40	1.21785	5.42189	4.03421	C3_07660W_A
chr6:838319-838749	40	1.21785	5.42189	4.03421	C6_03850C_A
chr7:436367-436945	40	1.21785	5.42189	4.03421	C7_02010C_A
chr6:337603-338274	39	1.2156	5.33201	3.95064	C6_01630W_A
chr1:2569253-2569504	38	1.21335	5.24289	3.86777	C1_11730W_A
chrR:1677749-1678048	38	1.21335	5.24289	3.86777	CR_07730W_A
chr1:1582729-1584099	37	1.21111	5.15454	3.78575	C1_07350C_A
chr3:782827-783491	37	1.21111	5.15454	3.78575	C3_03710W_A
chr4:639797-640453	37	1.21111	5.15454	3.78575	C4_03070W_A
chr4:968350-969032	37	1.21111	5.15454	3.78575	C4_04520W_A
chrR:1580061-1580973	37	1.21111	5.15454	3.78575	CR_07250C_A
chr4:966790-967871	37	1.20886	5.06696	3.70462	C4_04520W_A
chr4:1567210-1567542	36	1.20661	4.98014	3.62428	C4_07090C_A
chr1:2301366-2301688	34	1.20212	4.80883	3.46607	C1_10400C_A
chr4:435560-435841	34	1.20212	4.80883	3.46607	C4_02190C_A
chr6:903894-904671	34	1.20212	4.80883	3.46607	C6_04130C_A
chr7:450157-450572	40	1.20031	5.44759	4.05973	C7_02040C_A
chr1:1120285-1120602	33	1.19987	4.72433	3.38809	C1_05330C_A
chr3:540438-540708	33	1.19987	4.72433	3.38809	C3_02480C_A
chr7:902377-903070	33	1.19987	4.72433	3.38809	C7_04190C_A
chr7:699322-699608	32	1.19538	4.55765	3.23493	C7_03220C_A
chr1:2534857-2535425	31	1.19313	4.47547	3.15947	C1_11530C_A
chr4:1003076-1003498	31	1.19313	4.47547	3.15947	C4_04660C_A
chrR:38423-38672	31	1.19313	4.47547	3.15947	CR_00150C_A
chrR:1201543-1202180	30	1.19089	4.39406	3.08503	CR_05630W_A
chr4:1497875-1498596	33	1.19017	4.64612	3.31661	C4_06720W_A
chr1:911676-913002	30	1.18864	4.31343	3.01123	C1_04390C_A
chr5:475114-475687	28	1.18414	4.1545	2.86611	C5_02130W_A
chr7:217773-218136	28	1.18414	4.1545	2.86611	C7_01030C_A
chr5:485554-485913	26	1.1774	3.92195	2.6546	C5_02180C_A
chrR:1672912-1673264	26	1.1774	3.92195	2.6546	CR_07710W_A
chr5:43861-44454	25	1.17516	3.84599	2.5857	C5_00260W_A
chrR:359659-360212	25	1.17516	3.84599	2.5857	CR_01580C_A
chr3:571596-572427	25	1.17291	3.77081	2.51776	C3_02640C_A
chrR:66753-67155	25	1.17291	3.77081	2.51776	CR_00270C_A
chr4:399610-399877	24	1.17066	3.69641	2.45046	C4_02020W_A
chr1:2570222-2570820	23	1.16842	3.62279	2.38399	C1_11730W_A
chrR:1175667-1176465	23	1.16842	3.62279	2.38399	CR_05520W_A
chr1:678218-678645	23	1.16617	3.54996	2.3183	C1_03230C_A
chr2:881405-881698	22	1.16392	3.47791	2.25347	C2_04200W_A
chr5:216089-216875	22	1.16392	3.47791	2.25347	C5_00950C_A
chrR:1761355-1761692	22	1.16392	3.47791	2.25347	CR_08080W_A
chrR:1165975-1166718	21	1.16167	3.40664	2.18944	CR_05480W_A
chrR:1518400-1518842	21	1.15943	3.33616	2.12626	CR_07050C_A
chrR:2241048-2241352	21	1.15943	3.33616	2.12626	CR_10550W_A
chr2:1851827-1852730	20	1.15493	3.19754	2.00245	C2_09060C_A
chr3:852244-852748	19	1.15269	3.12941	1.94179	C3_04070C_A
chrR:183461-183918	18	1.15044	3.06207	1.8819	CR_00780C_A
chr4:1218003-1218423	18	1.14819	2.99551	1.82286	C4_05580C_A
chr5:410531-410834	18	1.14819	2.99551	1.82286	C5_01820W_A
chr1:1459930-1460257	18	1.14719	2.99359	1.82286	C1_06850W_A
chr7:924919-925584	17	1.1437	2.86476	1.70697	C7_04240C_A
chr4:159506-160141	16	1.14145	2.80056	1.6502	C4_00890W_A
chrR:1914500-1914920	15	1.13696	2.67453	1.53924	CR_08940W_A
chr1:2912227-2912952	15	1.13611	2.7122	1.57658	C1_13350W_A
chr1:1824652-1825073	14	1.13471	2.6127	1.48492	C1_08310W_A
chr5:1154396-1154724	14	1.13471	2.6127	1.48492	C5_05320C_A
chrR:1517258-1517885	14	1.13471	2.6127	1.48492	CR_07050C_A
chr6:835534-835829	14	1.13246	2.55165	1.43145	C6_03840C_A
chrR:1173260-1173576	14	1.13246	2.55165	1.43145	CR_05520W_A
chrR:1517258-1517885	14	1.13246	2.55165	1.43145	CR_07050C_A
chr4:442245-442572	13	1.13022	2.49139	1.37878	C4_02230C_A
chr1:1978269-1978538	13	1.12797	2.43192	1.32678	C1_09080C_A
chr1:266260-266540	13	1.12797	2.43192	1.32678	C1_01360C_A
chr4:1570454-1570969	13	1.12797	2.43192	1.32678	C4_07090C_A
