# Supplementary material for: Coordinated regulation of pH alkalinization by two transcription factors promotes fungal commensalism and pathogenicity
Source: Nat Commun. 2025 Aug 22;16:7855. doi: 10.1038/s41467-025-62953-x (PMC12373999; doi:10.1038/s41467-025-62953-x)
Supplement: Supplementary file 6 — Supplementary Data 4 [file 41467_2025_62953_MOESM6_ESM.xlsx]

## Sheet: Target genes
gene_ID	Symbol	description	log2FoldChange_dal81ko	padj_dal81ko	log2FoldChange_stp2ko	padj_stp2ko	peaksEnrichedInDal81	peaksEnrichedInStp2	geneType
CR_01780W_A	CAWG_01529	Putative S-adenosylmethionine-dependent methyltransferase; Hap43p-induced gene	2.53132	4.63047e-49	2.59502	1.76628e-51	TRUE	FALSE	dal81-specific Repression Gene
C3_04830C_A	FAS2	Alpha subunit of fatty-acid synthase; required for virulence in mouse systemic infection and rat oropharyngeal infection models; regulated by Efg1; fluconazole-induced; amphotericin B repressed; flow model and Spider biofilm repressed	-1.57588	2.56412e-52	-0.690428	4.01505e-11	TRUE	TRUE	dal81-specific Activation Gene
C1_07350C_A	GPX3	Putative glutathione peroxidase involved in Cap1p-dependent oxidative stress response, required for Cap1p oxidation in response to H2O2; planktonic growth-induced	-1.61858	1.57245e-11	-1.46436	1.09617e-09	FALSE	TRUE	stp2-specific Activation Gene
C5_05310W_A	PRE1	Putative beta 4 subunit of the 20S proteasome; Rim101-induced at acid pH; flucytosine induced; amphotericin B repressed	-1.003	1.93571e-10	-0.717401	6.04642e-06	TRUE	FALSE	dal81-specific Activation Gene
CR_05790C_A	ACO2	Putative aconitate hydratase 2; induced in high iron; regulated by Gcn4; repressed by amino acid starvation (3-AT); protein levels decrease in stationary phase yeast; flow model and Spider biofilm repressed	1.91113	2.88599e-45	1.55247	2.5172e-30	FALSE	TRUE	stp2-specific Repression Gene
CR_00780C_A	GSY1	UDP glucose/starch glucosyltransferase; transcript repressed by yeast-hyphal switch, Efg1-regulated; strong oxidative stress induced; colony morphology-related regulation by Ssn6; stationary phase enriched; flow model biofilm induced	-2.74567	1.53835e-47	-2.68758	1.33027e-45	TRUE	TRUE	Synergistic Activation Gene
C3_03870C_A	SAP9	Secreted aspartyl protease; roles in adhesion, cell surface integrity; induced by antifungal drugs, stationary phase, or in white-phase cells; farnesol-downregulated in biofilm; autocatalytic processing; GPI-anchor; Spider biofilm induced	-1.85531	5.49127e-34	-1.69086	1.74111e-28	TRUE	FALSE	dal81-specific Activation Gene
C5_00060C_A	CAWG_04402	Ortholog(s) have ubiquitin protein ligase activity, role in anaphase-promoting complex-dependent catabolic process, protein ubiquitination and anaphase-promoting complex, nuclear periphery localization	1.17013	2.56219e-18	1.09177	4.04704e-16	FALSE	TRUE	stp2-specific Repression Gene
C1_13940W_A	SIM1	Adhesin-like protein; involved in cell wall maintenance, redundant with Sun41; possibly secreted; macrophage-repressed; repressed by Rim101, Cyr1, Ras1; Spider biofilm induced	2.64592	3.11608e-30	2.63982	4.1279e-30	TRUE	TRUE	Coordinated Repression Gene
C4_04320W_A	FRE10	Major cell-surface ferric reductase under low-iron conditions; 7 transmembrane regions and a secretion signal predicted; Tup1, Rim101, Ssn6, Hog1, caspofungin repressed; ciclopirox olamine induced; rat catheter biofilm induced	1.95738	2.22253e-12	1.64101	4.39275e-09	FALSE	TRUE	stp2-specific Repression Gene
C3_04860W_A	SFP1	C2H2 transcription factor involved in regulation of biofilm formation; regulates carbon source-dependent stress response; rat catheter biofilm induced	1.08658	2.18967e-20	1.05683	2.31648e-19	TRUE	TRUE	Coordinated Repression Gene
C1_13140C_A	TYE7	bHLH transcription factor; control of glycolysis; required for biofilm formation; hyphally regulated by Cph1, Cyr1; flucytosine, Hog1 induced; amphotericin B, caspofungin repressed; induced in flow model biofilm and planktonic cultures	2.35932	1.86663e-43	2.3154	6.69286e-42	TRUE	FALSE	dal81-specific Repression Gene
C2_06570C_A	orf19.33	Predicted ORF from Assembly 19; removed from Assembly 20; restored based on transcription data; similar to orf19.7550	-1.91439	3.45273e-78	-0.907845	1.0369e-18	TRUE	FALSE	dal81-specific Activation Gene
C4_06570C_A	PDC11	Pyruvate decarboxylase; antigenic; on hyphal not yeast cell surface; Hap43, Gcn4, Efg1, Efh1, Hsf1 regulated; fluconazole, farnesol induced; amino acid starvation repressed; flow model biofilm induced; Spider biofilm repressed	-1.20552	2.69206e-08	-0.0615053	0.802019	TRUE	FALSE	dal81-specific Activation Gene
C3_05570W_A	QDR2	Predicted MFS membrane transporter, member of the drug:proton antiporter (12 spanner) (DHA1) family; Spider biofilm induced	2.26488	5.77281e-29	1.94577	1.02695e-21	TRUE	FALSE	dal81-specific Repression Gene
C3_03690W_A	CAWG_02686	Putative vacuolar membrane transporter for cationic amino acids; Spider biofilm induced	4.34584	1.45107e-141	4.36667	6.73138e-143	TRUE	TRUE	Coordinated Repression Gene
C5_02790C_A	GAP1	Amino acid permease; antigenic in human/mouse; 10-12 transmembrane regions; regulated by nitrogen source; alkaline, GlcNAc, phagocytosis induced; WT virulence in mice; Spider and flow model biofilm induced	0.909077	0.0038331	-1.79341	6.76199e-09	TRUE	TRUE	stp2-specific Activation Gene
C1_08500C_A	ENO1	Enolase, involved in glycolysis and gluconeogenesis; also has transglutaminase activity involved in assembly of cell wall polysaccharides; major cell-surface antigen; binds host plasmin/plasminogen; immunoprotective; may be essential	-1.67824	1.0613e-24	-0.919725	2.49268e-08	TRUE	TRUE	dal81-specific Activation Gene
C5_04030W_A	CAWG_04775	Protein of unknown function; flow model biofilm induced; Spider biofilm induced	3.94362	5.03416e-125	3.9238	9.03509e-124	TRUE	FALSE	dal81-specific Repression Gene
C5_04440C_A	SFC1	Putative succinate-fumarate transporter; involved in repression of growth on sorbose; alkaline induced; rat catheter biofilm induced; Spider biofilm induced	-2.22516	8.6507e-39	-1.9647	1.47848e-30	TRUE	FALSE	dal81-specific Activation Gene
C4_01070W_A	HGT17	Putative MFS family glucose transporter; 20 members in C. albicans; 12 probable membrane-spanning segments; induced at low (0.2%, compared to 2%) glucose in rich media; Spider biofilm induced	-1.62295	8.76892e-13	-3.12788	7.75042e-44	FALSE	TRUE	stp2-specific Activation Gene
C2_09220W_A	DDR48	Immunogenic stress-associated protein; filamentation regulated; induced by benomyl/caspofungin/ketoconazole or in azole-resistant strain; Hog1, farnesol, alkaline repressed; stationary phase enriched; Spider, flow model biofilm induced	-2.11128	6.37415e-16	-1.20166	5.24983e-06	TRUE	FALSE	dal81-specific Activation Gene
CR_03720W_A	TAL1	Transaldolase; protein present in exponential and stationary growth phase yeast cultures; oxidative stress-induced via Cap1; induced by nitric oxide independent of Yhb1p; sumoylation target; rat catheter biofilm repressed	-0.896028	3.39654e-08	-1.19341	1.49401e-13	TRUE	TRUE	stp2-specific Activation Gene
C1_09490C_A	GUA1	Putative GMP synthase, involved in the final step of guanine biosynthesis; soluble protein in hyphae; flucytosine induced; macrophage-downregulated protein abundance; protein level decreases in stationary phase cultures	1.63615	9.55273e-22	1.58	2.25192e-20	TRUE	FALSE	dal81-specific Repression Gene
C3_04530C_A	TEC1	TEA/ATTS transcription factor; white cell pheromone response, hyphal gene regulation; required for Spider and RPMI biofilm formation; regulates BCR1; Cph2 regulated transcript; alkaline, rat catheter, Spider, flow model biofilm induced	1.21239	0.00778429	0.860334	0.0629223	TRUE	FALSE	dal81-specific Repression Gene
C2_05070W_A	FRE9	Ferric reductase; alkaline induced; ciclopirox olamine; Hap43-induced	4.01062	2.45216e-52	3.32389	3.49289e-36	TRUE	FALSE	dal81-specific Repression Gene
CR_04360C_A	NHP2	Putative H/ACA snoRNP protein; macrophage/pseudohyphal-induced	1.85	4.14477e-32	1.88073	3.80394e-33	TRUE	FALSE	dal81-specific Repression Gene
C4_02230C_A	CAWG_03571	Catechol 1,2-dioxygenase (1,2-CTD), involved in degradation of aromatic compounds; Spider biofilm induced	2.91769	2.62946e-56	3.22662	6.202e-69	FALSE	TRUE	stp2-specific Repression Gene
C4_02940W_A	ABP1	Ortholog of S. cerevisiae Abp1; actin-binding protein of the cortical actin cytoskeleton; caspofungin induced; protein only detected in stationary phase yeast-form cultures; Spider biofilm repressed	-1.522	3.51402e-17	-1.45835	6.84262e-16	TRUE	FALSE	dal81-specific Activation Gene
C1_13820C_A	CAWG_00070	Protein of unknown function; Hap43-induced; Spider biofilm induced	2.87952	1.3031e-44	2.89763	3.70761e-45	TRUE	FALSE	dal81-specific Repression Gene
CR_08880C_A	CAWG_02166	Protein of unknown function; rat catheter and Spider biofilm induced	2.29335	8.44698e-11	2.50366	1.16168e-12	TRUE	FALSE	dal81-specific Repression Gene
CR_04300W_A	CAWG_01767	Ortholog(s) have tRNA (cytosine-5-)-methyltransferase activity, tRNA binding activity, role in cellular response to hydrogen peroxide, tRNA wobble base cytosine methylation and nucleus localization	1.42599	9.82055e-32	1.47438	7.75905e-34	FALSE	TRUE	stp2-specific Repression Gene
CR_06720W_A	NMD3	Putative nonsense-mediated mRNA decay protein; repressed in core stress response; repressed by prostaglandins	1.93111	1.879e-39	2.1596	5.37833e-49	TRUE	FALSE	dal81-specific Repression Gene
C4_00130W_A	RBT5	GPI-linked cell wall protein; hemoglobin utilization; Rfg1, Rim101, Tbf1, Fe regulated; Sfu1, Hog1, Tup1, serum, alkaline pH, antifungal drugs, geldamycin repressed; Hap43 induced; required for RPMI biofilms; Spider biofilm induced	-1.29238	5.46276e-09	-2.60775	1.69768e-32	TRUE	TRUE	Synergistic Activation Gene
C1_08710W_A	CAWG_00554	Ortholog of S. cerevisiae : YNL050C, C. glabrata CBS138 : CAGL0G01276g, C. dubliniensis CD36 : Cd36_08220, C. parapsilosis CDC317 : CPAR2_804440 and Candida tenuis NRRL Y-1498 : CANTEDRAFT_94168	1.55163	6.11075e-34	1.50211	7.11136e-32	TRUE	FALSE	dal81-specific Repression Gene
C3_00240C_A	GLO3	Putative ARF GTPase activator; role in COPI coating of Golgi vesicle, ER to Golgi vesicle-mediated transport, retrograde Golgi to ER vesicle-mediated transport; Spider biofilm repressed	-1.2095	4.29522e-23	-1.17176	9.21035e-22	TRUE	FALSE	dal81-specific Activation Gene
C4_02410C_A	AHP1	Alkyl hydroperoxide reductase; immunogenic; fluconazole-induced; amphotericin B, caspofungin, alkaline repressed; core stress response induced; Ssk1/Nrg1/Tup1/Ssn6/Hog1 regulated; flow model biofilm induced; rat catheter biofilm repressed	3.5974	4.84915e-93	3.55046	1.2016e-90	TRUE	FALSE	dal81-specific Repression Gene
C4_01600C_A	snR75	C/D box small nucleolar RNA (snoRNA)	3.71222	7.35247e-11	3.10832	5.7909e-08	FALSE	TRUE	stp2-specific Repression Gene
C4_04710W_A	GYP1	Putative Cis-golgi GTPase-activating protein; required for hyphen growth and virulence; transcript regulated by Nrg1, Mig1, and Tup1	-1.69916	1.45826e-34	-1.5637	1.61711e-29	TRUE	TRUE	Synergistic Activation Gene
C2_07900W_A	GDH2	Putative NAD-specific glutamate dehydrogenase; fungal-specific; transcript regulated by Nrg1, Mig1, Tup1, and Gcn4; stationary phase enriched protein; flow model biofilm induced; Spider biofilm induced	-2.9592	2.47768e-146	-3.10236	8.83865e-161	TRUE	TRUE	Synergistic Activation Gene
C4_00200C_A	MET15	O-acetylhomoserine O-acetylserine sulfhydrylase; sulfur amino acid synthesis; immunogenic; Hog1, adherence-induced; brown color of mutant in Pb(2+) medium a visual selection; chlamydospore formation induced, F-12/CO2 biofilm induced	-1.00094	1.11112e-13	-1.6481	8.63081e-35	TRUE	TRUE	Synergistic Activation Gene
C4_06120W_A	GDH3	NADP-glutamate dehydrogenase; Nrg1, Plc1 regulated; hypha, hypoxia, Efg1-repressed; Rim101-induced at pH 8; GlcNAc, ciclopirox, ketoconazole induced; exp and stationary phase protein; Spider biofilm repressed; rat catheter biofilm induced	5.61348	6.46659e-18	4.02781	7.27434e-10	TRUE	FALSE	dal81-specific Repression Gene
C2_10690W_A	TPS3	Predicted trehalose-phosphate synthase regulatory subunit; regulated by Efg1; regulated by Tsa1, Tsa1B under H2O2 stress conditions; flow model biofilm induced (reports differ)	-1.14328	3.33561e-10	-0.918173	4.98574e-07	TRUE	TRUE	dal81-specific Activation Gene
C1_01150C_A	CAWG_01260	Ortholog(s) have tRNA methyltransferase activity and role in tRNA methylation, wybutosine biosynthetic process	1.91622	2.28765e-46	1.83064	2.03801e-42	TRUE	FALSE	dal81-specific Repression Gene
C7_01260W_A	snR24	C/D box small nucleolar RNA (snoRNA); snR24 is encoded within the intron of orf19.6906/ASC1	3.13973	4.22529e-16	2.24187	1.06584e-08	TRUE	TRUE	Coordinated Repression Gene
C3_07640C_A	FUM12	Putative fumarate hydratase; enzyme of citric acid cycle; fluconazole, Efg1 repressed; induced in high iron; protein present in exponential and stationary growth phase	-1.43955	7.15267e-33	-1.6583	3.68578e-43	TRUE	FALSE	dal81-specific Activation Gene
C2_07380W_A	SSC1	Heat shock protein; at yeast-form cell surface, not hyphae; antigenic; Gcn4-regulated; induced by amino acid starvation (3-AT) or by adherence to polystyrene; macrophage-repressed; sumoylation target; possibly essential	-1.09953	1.65389e-24	-1.40652	2.97537e-39	TRUE	TRUE	Synergistic Activation Gene
CR_00210W_A	ALK2	N-Alkane inducible cytochrome P450	2.03828	4.75769e-36	2.52803	6.14355e-55	TRUE	FALSE	dal81-specific Repression Gene
C5_00950C_A	CAWG_04488	Ortholog(s) have S-adenosylmethionine-dependent methyltransferase activity, role in histone lysine methylation and nuclear chromatin localization	1.21233	4.23337e-26	1.34098	1.17598e-31	FALSE	TRUE	stp2-specific Repression Gene
C3_07550C_A	CAWG_03061	Protein required for mitochondrial ribosome small subunit biogenesis; role in maturation of SSU-rRNA; Spider biofilm induced	1.08941	2.05161e-11	0.929283	1.19149e-08	TRUE	FALSE	dal81-specific Repression Gene
C1_03350C_A	RLI1	Member of RNase L inhibitor (RLI) subfamily of ABC family; predicted not to be a transporter; regulated by Sef1p, Sfu1p, and Hap43p	1.23061	9.68699e-13	1.1729	1.07478e-11	TRUE	TRUE	Coordinated Repression Gene
C6_02080W_A	CAWG_05160	Ortholog of Candida albicans WO-1 : CAWG_05160	3.06026	1.76596e-26	3.10201	3.44544e-27	TRUE	TRUE	Coordinated Repression Gene
C6_02390W_A	snR58	C/D box small nucleolar RNA (snoRNA)	3.4723	4.40732e-27	3.85784	2.80434e-33	FALSE	TRUE	stp2-specific Repression Gene
C1_05730W_A	snR39b	C/D box small nucleolar RNA (snoRNA); encoded within the 2nd intron of orf19.2478.1	2.50283	5.3566e-11	1.97335	3.19432e-07	TRUE	TRUE	Coordinated Repression Gene
C7_01760C_A	ISU1	Protein with similarity to NifU; possible role in iron-sulfur cluster biogenesis; induced in low iron; rat catheter biofilm induced; rat catheter and Spider biofilm induced	1.19908	2.07572e-26	0.962678	1.71943e-17	TRUE	FALSE	dal81-specific Repression Gene
C5_01820W_A	STI1	Protein that interacts with Cdc37 and Crk1 in two-hybrid; may be involved in Cdc37 chaperone activity; soluble protein in hyphae; protein in exponential and stationary phase yeast cultures; YNB biofilm induced; Spider biofilm induced	-1.83297	1.29953e-24	-2.20442	5.34412e-35	FALSE	TRUE	stp2-specific Activation Gene
C2_10540W_A	CAWG_06116	Putative transcription factor with zinc finger DNA-binding motif; possible ortholog of S. cerevisiae Mig2p	1.04293	6.62872e-15	1.17132	1.82551e-18	TRUE	TRUE	Coordinated Repression Gene
C7_00330C_A	CAWG_05390	Ortholog(s) have N(6)-L-threonylcarbamoyladenine synthase activity, single-stranded telomeric DNA binding activity and role in regulation of translational fidelity, tRNA threonylcarbamoyladenosine modification, telomere maintenance	3.32812	2.07914e-59	2.73825	1.22113e-40	TRUE	FALSE	dal81-specific Repression Gene
C3_05590C_A	BAT22	Putative branched chain amino acid aminotransferase; regulated by Gcn4p; induced by farnesol treatment, GlcNAc, amino acid starvation (3-aminotriazole treatment); present in exponential and stationary growth phase yeast cultures	1.82102	1.31764e-35	1.08895	1.40238e-13	TRUE	TRUE	Coordinated Repression Gene
C7_00930W_A	GPH1	Putative glycogen phosphorylase; role in glycogen metabolism; regulated by Ssk1, Mig1, Tup1, Hap43; fluconazole-induced; localizes to cell surface of hyphae, not yeast; stationary phase enriched protein; Spider biofilm induced	-2.0029	3.80926e-26	-1.99923	4.61122e-26	TRUE	TRUE	Synergistic Activation Gene
C6_01430C_A	FRP6	Putative ammonia transport protein; regulated by Nrg1 and Tup1; regulated by Ssn6; induced by human neutrophils	0.655994	5.79251e-05	2.49105	4.78084e-55	TRUE	TRUE	stp2-specific Repression Gene
CR_02530W_A	DBP2	Putative DEAD-box family ATP-dependent RNA helicase; flucytosine induced; repressed in core stress response	1.5341	5.64868e-12	1.92235	4.63607e-18	TRUE	TRUE	Coordinated Repression Gene
C5_02130W_A	CAWG_04597	Ortholog of Candida tropicalis MYA-3404 : CTRG_03197, Candida lusitaniae ATCC 42720 : CLUG_02837 and Candida albicans WO-1 : CAWG_04597	4.66569	0.00987357	3.9085	0.0359223	TRUE	TRUE	Coordinated Repression Gene
C1_02540C_A	tR(UCU)4	tRNA-Arg, predicted by tRNAscan-SE; UCU anticodon	-6.78588	2.03452e-06	-3.54756	0.000470462	FALSE	TRUE	stp2-specific Activation Gene
C3_00810C_A	FOX2	3-hydroxyacyl-CoA epimerase; fatty acid beta-oxidation; induced by phagocytosis; regulated by Mig1, by white-opaque switch, by DNA methylation; transcriptional activation by oleate requires Ctf1; rat catheter and Spider biofilm induced	-1.85569	1.31833e-21	-1.40974	4.8988e-13	TRUE	TRUE	Synergistic Activation Gene
C6_04530C_A	CAWG_04928	Ortholog(s) have role in endocytic recycling and endosome localization	1.99276	1.02435e-39	2.47546	1.54087e-60	FALSE	TRUE	stp2-specific Repression Gene
CR_01620C_A	MET6	Essential 5-methyltetrahydropteroyltriglutamate-homocysteine methyltransferase (cobalamin-independent methionine synthase); antigenic in murine/human systemic infection; heat shock, estrogen, GCN-induced; Spider biofilm repressed	-2.14618	3.72957e-60	-2.75278	4.28359e-98	TRUE	TRUE	Synergistic Activation Gene
CR_03920C_A	TPO4	Putative sperimidine transporter; fungal-specific (no human or murine homolog); Spider biofilm induced; promoter bound by Tec1 and Ndt80; Bcr1-repressed in RPMI a/a biofilms	1.66559	3.594e-46	1.63726	1.223e-44	FALSE	TRUE	stp2-specific Repression Gene
CR_02280W_A	PGA23	Putative GPI-anchored protein of unknown function; Rim101-repressed; Cyr1-regulated; colony morphology-related gene regulation by Ssn6	-2.49973	2.25543e-21	-1.99848	3.01995e-14	FALSE	TRUE	stp2-specific Activation Gene
C6_00960W_A	CAN1	Basic amino acid permease; complements lysine transport mutation; 10 predicted transmembrane regions, 3 predicted N-glycosylation sites; phagocytosis by macrophages induces transcript; rat catheter, Spider and flow model biofilm induced	3.71112	6.1735e-75	3.18999	1.02922e-55	TRUE	FALSE	dal81-specific Repression Gene
C5_05050W_A	ADH1	Alcohol dehydrogenase; oxidizes ethanol to acetaldehyde; at yeast cell surface; immunogenic in humans/mice; complements S. cerevisiae adh1 adh2 adh3 mutant; fluconazole, farnesol-induced; flow model biofilm induced; Spider biofilm repressed	-2.53766	8.28376e-33	-1.74281	3.5247e-16	TRUE	TRUE	Synergistic Activation Gene
C2_09880C_A	CAWG_06060	Putative protein of unknown function; Plc1-regulated; transcript induced by Mnl1 under weak acid stress; flow model, rat catheter, Spider biofilm induced	5.91046	1.71162e-121	5.45618	1.32743e-103	TRUE	FALSE	dal81-specific Repression Gene
C6_00830C_A	CAN3	Predicted amino acid transmembrane transporter; transcript regulated by white-opaque switch; Hap43-repressed gene	0.0780413	0.729409	1.41761	1.21308e-12	FALSE	TRUE	stp2-specific Repression Gene
CR_02980C_A	SRP40	Putative chaperone of small nucleolar ribonucleoprotein particles; macrophage/pseudohyphal-induced; rat catheter biofilm induced	2.97815	1.03495e-52	2.83711	6.05744e-48	TRUE	FALSE	dal81-specific Repression Gene
CR_08080W_A	CAWG_02100	Has domain(s) with predicted RNA binding activity	2.60971	9.08573e-19	2.41415	3.12195e-16	FALSE	TRUE	stp2-specific Repression Gene
CR_10840C_A	XYL2	D-xylulose reductase; immunogenic in mice; soluble protein in hyphae; induced by caspofungin, fluconazole, Hog1 and during cell wall regeneration; Mnl1-induced in weak acid stress; stationary phase enriched; flow model biofilm induced	-1.83616	2.17053e-20	-1.3999	2.04579e-12	FALSE	TRUE	stp2-specific Activation Gene
C2_06400C_A	snR54	C/D box small nucleolar RNA (snoRNA); snR54 is encoded within the intron of orf19.18/IMH3	2.58894	2.24558e-09	1.97452	8.29127e-06	TRUE	TRUE	Coordinated Repression Gene
C3_04510W_A	CAWG_02764	Protein of unknown function; Hap43-induced; F-12/CO2 early biofilm induced	3.70107	1.46858e-59	3.4772	1.00402e-52	TRUE	TRUE	Coordinated Repression Gene
C3_04910C_A	NCE102	Non classical protein export protein; localized to plasma membrane; Hap43-induced gene; flow model biofilm induced; Spider biofilm induced	-1.26255	4.69013e-23	-1.08311	2.48794e-17	TRUE	TRUE	Synergistic Activation Gene
C1_14020W_A	CAWG_00051	Putative Rho GDP dissociation inhibitor; induced by nitric oxide independent of Yhb1p	3.14084	4.35526e-26	3.66257	2.83747e-35	TRUE	FALSE	dal81-specific Repression Gene
C2_03940C_A	SCH9	Protein kinase; involved in growth control, cell size, resistance to rapamycin, cations, chlamydospore formation, filamentous growth under some conditions, and virulence; prevents hyphal growth in hypoxia at high CO2; Spider biofilm induced	2.34017	3.20496e-38	2.07194	3.08258e-30	TRUE	FALSE	dal81-specific Repression Gene
C4_02020W_A	CAT2	Major carnitine acetyl transferase; intracellular acetyl-CoA transport; localized in peroxisomes and mitochondria; induced in macrophages; Hog1-repressed; stationary phase enriched; farnesol-upregulated in biofilm; Spider biofilm induced	-1.71601	7.37047e-40	-1.4464	9.93317e-29	TRUE	TRUE	Synergistic Activation Gene
C6_00440C_A	FET34	Multicopper ferroxidase; induced by low iron, ciclopirox olamine, ketoconazole, hypoxia; alkaline induced by Rim101; repressed in fluconazole-resistant isolate; Sfu1, Hog1 repressed; complements S. cerevisiae fet3; Spider biofilm induced	2.14455	2.34012e-18	2.45749	1.06095e-23	TRUE	FALSE	dal81-specific Repression Gene
C5_00310C_A	CAWG_04426	Protein with a fungal RNA polymerase I subunit RPA14 domain; proposed to play a role in the recruitment of pol I to the promoter; Hap43-induced gene	3.31959	5.42582e-92	3.19398	3.12846e-85	TRUE	FALSE	dal81-specific Repression Gene
CR_06860C_A	ARO10	Aromatic decarboxylase; Ehrlich fusel oil pathway of aromatic alcohol biosynthesis; alkaline repressed; protein abundance affected by URA3 expression in CAI-4 strain; Spider biofilm induced	-2.87149	5.72506e-27	-3.18707	6.36891e-33	TRUE	TRUE	Synergistic Activation Gene
C3_01960C_A	POX1-3	Predicted acyl-CoA oxidase; farnesol regulated; stationary phase enriched protein; Spider biofilm induced	-2.03596	1.53174e-42	-1.55777	1.77347e-25	TRUE	FALSE	dal81-specific Activation Gene
CR_07730W_A	HGT14	Putative MFS glucose transporter; 20 member C. albicans glucose transporter family; 12 probable membrane-spanning segments; expressed in rich medium with 2% glucose; rat catheter and flow model biofilm induced	1.31798	1.15272e-31	1.73583	5.34624e-54	TRUE	TRUE	Coordinated Repression Gene
C1_09690W_A	MLS1	Malate synthase; glyoxylate cycle enzyme; no mammalian homolog; regulated upon white-opaque switch; phagocytosis, strong oxidative stress induced; stationary phase enriched; flow model biofilm repressed; rat catheter, Spider biofilm induced	-2.85813	7.77502e-44	-1.99567	4.59061e-22	TRUE	TRUE	Synergistic Activation Gene
C6_04350C_A	FLO8	Transcription factor; required for hyphal formation and CO2 induced white-opaque switching; regulates hyphal gene expression; required for virulence in mouse systemic infection; binds Efg1p; binds Mss11p via LisH motif; has LUFS domain	0.364333	0.0074517	1.13023	1.4491e-17	TRUE	TRUE	stp2-specific Repression Gene
C3_07800C_A	CAWG_03086	Putative 35S rRNA processing protein; Hap43-induced; repressed by prostaglandins; Spider biofilm induced	2.36992	1.79595e-43	2.25371	1.98035e-39	TRUE	TRUE	Coordinated Repression Gene
C7_03180C_A	HHO1	Putative histone H1; farnesol regulated; Hap43-induced; contains 5 UTR intron; Spider biofilm repressed	1.27067	1.30793e-20	0.72522	1.41941e-07	TRUE	TRUE	dal81-specific Repression Gene
CR_06140W_A	CAWG_01929	Protein of unknown function; regulated by Tsa1, Tsa1B in minimal media at 37 degrees C; shows colony morphology-related gene regulation by Ssn6; Spider biofilm induced	1.99306	9.14055e-36	1.95065	2.55134e-34	TRUE	TRUE	Coordinated Repression Gene
C6_04620C_A	NAG4	Putative transporter; fungal-specific; similar to Nag3p and to S. cerevisiae Ypr156Cp and Ygr138Cp; required for wild-type mouse virulence and wild-type cycloheximide resistance; gene cluster encodes enzymes of GlcNAc catabolism	3.20451	1.12256e-53	3.82913	3.95551e-76	TRUE	TRUE	Coordinated Repression Gene
CR_07420W_A	KGD2	Putative dihydrolipoamide S-succinyltransferase; induced in high iron; Hap43-repressed; Spider biofilm repressed	-1.70575	1.25367e-52	-1.71198	5.53345e-53	TRUE	TRUE	Synergistic Activation Gene
C4_06970C_A	ZRT1	Putative zinc transporter; acts with Pra1 in sequestration of zinc from host tissues during infection; hyphal, macrophage-induced; alkaline induced upon adherence to polystyrene; induced in oralpharyngeal candidasis; Spider biofilm induced	3.4749	1.45872e-54	2.91029	8.01384e-38	TRUE	FALSE	dal81-specific Repression Gene
CR_09120C_A	TUB1	Alpha-tubulin; gene has intron; complements cold-sensitivity of S. cerevisiae tub1 mutant; C. albicans has single alpha-tubulin gene, whereas S. cerevisiae has two (TUB1, TUB3); farnesol-upregulated in biofilm; sumoylation target	-1.19247	2.47917e-26	-0.959874	1.52766e-17	TRUE	TRUE	dal81-specific Activation Gene
C6_02010C_A	GPD2	Surface protein similar to glycerol 3-P dehydrogenase; binds host Factor H, FHL-1, plasminogen; regulated by Ssn6, Nrg1, Efg1; induced by cell wall regeneration, macrophage/pseudohyphal growth, core stress response; Spider biofilm induced	2.87169	3.5218e-35	3.70665	1.08148e-57	TRUE	FALSE	dal81-specific Repression Gene
CR_03890W_A	WOR3	Transcription factor; modulator of white-opaque switch; induced in opaque cells; promoter bound by Wor1; overexpression at 25 degr shifts cells to opaque state; deletion stabilizes opaque cells at higher temperatures; Spider biofilm induced	-3.46885	1.29486e-107	-2.62827	6.44445e-63	FALSE	TRUE	stp2-specific Activation Gene
C1_10880W_A	CAWG_00345	Putative U3 snoRNA-associated protein; Hap43-induced; transposon mutation affects filamentous growth; repressed by prostaglandins	2.67565	3.07209e-54	2.52376	2.19793e-48	FALSE	TRUE	stp2-specific Repression Gene
C2_06070W_A	FAA2-1	Predicted long chain fatty acid CoA ligase; upregulated upon phagocytosis; induced by nitric oxide independent of Yhb1	-1.79591	1.86563e-26	-1.78775	3.10615e-26	FALSE	TRUE	stp2-specific Activation Gene
C1_10740C_A	ASR1	Heat shock protein; transcript regulated by cAMP, osmotic stress, ciclopirox olamine, ketoconazole; repressed by Cyr1, Ras1; colony morphology-related regulated by Ssn6; stationary phase enriched; Hap43-induced; Spider biofilm induced	-1.36446	1.79766e-05	-0.998674	0.0018561	TRUE	TRUE	dal81-specific Activation Gene
C3_00920W_A	ATO1	Putative fungal-specific transmembrane protein; induced by Rgt1; Spider biofilm induced	0.95131	1.6248e-07	2.98693	2.89901e-63	TRUE	TRUE	stp2-specific Repression Gene
CR_08000C_A	CAWG_02093	Protein with an aspartate aminotransferase domain; Gcn4-regulated	1.41062	6.18137e-34	1.39504	3.16072e-33	TRUE	TRUE	Coordinated Repression Gene
C2_03390C_A	HSP78	Heat-shock protein; regulated by macrophage response, Nrg1, Mig1, Gcn2, Gcn4, Mnl1p; heavy metal (cadmium) stress-induced; stationary phase enriched protein; rat catheter and Spider biofilm induced	-3.99641	3.3297e-45	-4.72417	1.56832e-62	TRUE	FALSE	dal81-specific Activation Gene
C4_00160C_A	CAR2	Ornithine aminotransferase; arginine metabolism; alkaline induced; mutant sensitivite to toxic ergosterol analog, to amphotericin B; exponential and stationary phase yeast; flow model biofilm induced; rat catheter, Spider biofilm repressed	-3.85322	3.71252e-103	-3.12198	3.23972e-68	TRUE	FALSE	dal81-specific Activation Gene
C1_07090C_A	CAWG_00707	Ortholog(s) have 3-5-exoribonuclease activity	1.10222	9.04117e-18	1.03991	5.73512e-16	FALSE	TRUE	stp2-specific Repression Gene
C4_04700W_A	SSZ1	Putative HSP70 chaperone; protein level decreases in stationary phase cultures; Spider biofilm repressed	1.30579	5.40601e-16	1.31792	2.85329e-16	TRUE	TRUE	Coordinated Repression Gene
C1_06900C_A	MMD1	Mitochondrial protein; possibly required for transamination of isoleucine; macrophage-downregulated protein abundance; rat catheter and Spider biofilm repressed	-0.954646	1.2207e-15	-1.37451	5.79668e-31	TRUE	TRUE	stp2-specific Activation Gene
C3_04380C_A	CAWG_02750	Putative U3 snoRNP protein; flucytosine induced	1.99854	1.23945e-34	2.15805	3.63025e-40	TRUE	FALSE	dal81-specific Repression Gene
C4_06540W_A	MNN4	Regulator of mannosylphosphorylation of N-linked mannans to cell wall proteins; no role in virulence or normal interaction with macrophages; mutant induces inflammatory cytokines in dendritic cells; rat catheter and Spider biofilm induced	2.09493	4.268e-23	1.69687	1.33551e-15	TRUE	FALSE	dal81-specific Repression Gene
C1_06930W_A	PGA63	Component COPII vesicle coat; required for vesicle formation in ER to Golgi transport; predicted GPI-anchor; flow model and Spider biofilm repressed	-0.905979	4.9463e-20	-1.07575	1.09791e-27	FALSE	TRUE	stp2-specific Activation Gene
C6_03600C_A	orf19.5728	Putative cytochrome P450; Spider biofilm induced	-1.65423	4.61272e-13	1.11624	7.74682e-07	TRUE	FALSE	dal81-specific Activation Gene
CR_08990C_A	SLP3	Plasma membrane protein implicated in stress response; similar to stomatin mechanoreception proteins; overexpression induces apoptotic-like cell death; absent from hyphal cells; induced by Rgt1; rat catheter and Spider biofilm induced	-1.58879	2.01439e-06	-1.29443	0.000115533	TRUE	FALSE	dal81-specific Activation Gene
CR_00680W_A	BUD22	Protein with a predicted role in 18S rRNA maturation and small ribosomal subunit biogenesis; repressed in core stress response; repressed by prostaglandins	2.26809	5.01117e-63	2.27222	3.09589e-63	FALSE	TRUE	stp2-specific Repression Gene
C7_01990C_A	CAWG_05549	Putative allantoate permease; Gcn4-regulated; Spider biofilm induced	1.36115	1.28658e-50	0.727591	3.11181e-15	TRUE	TRUE	dal81-specific Repression Gene
C6_00480C_A	FET31	Putative multicopper oxidase; ketoconazole/caspofungin/amphotericin B repressed; Sef1/Sfu1/Hap43 regulated; reports differ if functional homolog of ScFet3; rat catheter and Spider biofilm induced	1.80854	1.43179e-28	2.3334	9.94448e-47	FALSE	TRUE	stp2-specific Repression Gene
CR_07010W_A	MIS11	Predicted mitochondrial C1-tetrahydrofolate synthase precursor; putative protein of glycine catabolism; repressed by Efg1; fluconazole-induced; stationary phase enriched protein; rat catheter and Spider biofilm repressed	-1.52886	7.71197e-33	-2.0621	1.51817e-58	FALSE	TRUE	stp2-specific Activation Gene
C5_04570C_A	URA7	CTP synthase 1; flucytosine induced; protein present in exponential and stationary growth phase yeast cultures	2.22797	1.46548e-34	2.23569	8.44136e-35	TRUE	TRUE	Coordinated Repression Gene
C1_11870W_A	MUP1	Putative high affinity methionine permease; alkaline upregulated by Rim101; Spider biofilm induced	1.16195	1.01837e-06	0.531	0.0294412	TRUE	TRUE	dal81-specific Repression Gene
C6_01630W_A	TIF3	Putative translation initiation factor; genes encoding ribosomal subunits, translation factors, and tRNA synthetases are downregulated upon phagocytosis by murine macrophage	0.989601	4.35473e-09	1.39878	7.11721e-17	FALSE	TRUE	stp2-specific Repression Gene
C3_07830W_A	FBP1	Fructose-1,6-bisphosphatase; key gluconeogenesis enzyme; regulated by Efg1, Ssn6; induced by phagocytosis; effects switch from glycolysis to gluconeogenesis in macrophage; rat flow model biofilm induced; overlaps orf19.6179	-2.22302	8.5507e-26	-2.45523	3.52235e-31	TRUE	FALSE	dal81-specific Activation Gene
CR_04190W_A	SRV2	Adenylate cyclase-associated protein; regulates adenylate cyclase activity; required for wild-type germ tube formation and for virulence in mice; mutant defects in filamentous growth are rescued by cAMP or dbcAMP; Spider biofilm repressed	-1.08072	1.90893e-13	-1.16369	2.2266e-15	TRUE	FALSE	dal81-specific Activation Gene
C7_04190C_A	UTP18	Putative U3 snoRNA-associated protein; Hap43-induced; repressed in core stress response; physically interacts with TAP-tagged Nop1	3.13349	7.88078e-70	2.64244	4.71741e-50	FALSE	TRUE	stp2-specific Repression Gene
C4_02190C_A	CAWG_03575	CoA-transferase family protein; rat catheter biofilm repressed	2.34363	7.4965e-23	3.67112	1.00246e-55	FALSE	TRUE	stp2-specific Repression Gene
C5_05340W_A	CAWG_04900	Ortholog(s) have unfolded protein binding activity, role in ribosomal large subunit assembly and cytosol, cytosolic ribosome localization	2.6625	7.3574e-54	2.73788	7.4117e-57	TRUE	FALSE	dal81-specific Repression Gene
C2_07320W_A	ARP3	Protein with Myo5p-dependent localization to cortical actin patches at hyphal tip; mutation confers hypersensitivity to cytochalasin D; Spider biofilm repressed	-1.11599	3.81168e-20	-1.0225	3.88171e-17	TRUE	FALSE	dal81-specific Activation Gene
C5_03550W_A	CAWG_04728	Ortholog(s) have Ran GTPase binding, structural constituent of nuclear pore activity	1.20373	4.14248e-32	0.996565	2.03604e-22	TRUE	TRUE	dal81-specific Repression Gene
C5_02180C_A	LEU3	Zn(II)2Cys6 transcription factor; predicted regulator branched-c ofhain amino acid biosynthesis genes; alkaline induced; induced by Mnl1 under weak acid stress; required for yeast cell adherence to silicone substrate; Spider biofilm induced	1.82563	3.41567e-62	1.90396	1.62259e-67	FALSE	TRUE	stp2-specific Repression Gene
C4_03430W_A	MOH1	Ortholog of S. cerevisiae Moh1, essential for staionary phase growth; induced by alpha pheromone in SpiderM medium and by Mnl1 under weak acid stress; possibly essential (UAU1 method); flow model biofilm induced; Spider biofilm induced	2.15912	6.47112e-30	2.03262	1.16676e-26	TRUE	FALSE	dal81-specific Repression Gene
C4_00480W_A	DUR4	Putative urea permease; fungal-specific (no human or murine homolog); possibly an essential gene, disruptants not obtained by UAU1 method	2.25373	8.76063e-53	2.23394	7.50908e-52	TRUE	FALSE	dal81-specific Repression Gene
CR_10650W_A	LTV1	Putative GSE complex component; repressed by prostaglandins	2.48569	1.1546e-52	2.55844	1.06007e-55	TRUE	FALSE	dal81-specific Repression Gene
C1_13860C_A	GND1	6-phosphogluconate dehydrogenase; soluble in hyphae; farnesol, macrophage-induced protein; antigenic in mice; dual localization to cytosol and peroxisomes depends on alternative splicing; rat catheter and Spider biofilm repressed	-1.03288	7.16119e-11	-1.09856	3.91944e-12	TRUE	TRUE	Synergistic Activation Gene
CR_01580C_A	DOT6	Protein with a predicted role in telomeric gene silencing and filamentation; repressed by high-level peroxide stress; Spider biofilm induced	1.98123	9.51406e-56	2.11431	2.74651e-63	FALSE	TRUE	stp2-specific Repression Gene
C4_00890W_A	ARO1	Putative pentafunctional arom enzyme; required for aromatic amino acid biosynthesis; involved in cell wall integrity and formation of biofilm; fungal-specific (no human or murine homolog); Gcn2p-, Gcn4p-regulated	1.45582	2.86159e-41	1.43562	3.63025e-40	TRUE	TRUE	Coordinated Repression Gene
C5_00270W_A	PGA14	Putative GPI-anchored protein; induced during cell wall regeneration; regulated by Ssn6p	1.50157	4.89586e-34	1.66682	1.22943e-41	TRUE	TRUE	Coordinated Repression Gene
C6_00920W_A	CAWG_05267	Putative mitochondrial intermembrane space protein; colony morphology-related gene regulation by Ssn6; regulated by Sef1, Sfu1, and Hap43; Spider biofilm repressed; rat catheter biofilm induced	-1.45817	3.77482e-20	-1.32131	8.56203e-17	TRUE	FALSE	dal81-specific Activation Gene
C2_07210C_A	TPK2	cAMP-dependent protein kinase catalytic subunit; isoform of Tpk1; involved in regulation of filamentation, phenotypic switching and mating; needed for epithelial cell damage, engulfment and oral virulence in mice	-1.45569	1.56097e-21	-1.32895	3.51683e-18	TRUE	FALSE	dal81-specific Activation Gene
C3_04070C_A	CDR11	Putative transporter of PDR subfamily of ABC family; Gcn4-regulated; induced by Rim101 at pH 8; Spider biofilm induced	-1.08715	2.57513e-08	-1.43566	1.52914e-13	FALSE	TRUE	stp2-specific Activation Gene
C1_00350C_A	HMX1	Heme oxygenase; utilization of hemin iron; transcript induced by heat, low iron, or hemin; repressed by Efg1; induced by low iron; upregulated by Rim101 at pH 8; Hap43-induced; Spider and flow model biofilm induced	-2.73701	2.17355e-79	-2.78292	5.79338e-82	TRUE	TRUE	Synergistic Activation Gene
CR_06000W_A	SOK1	Protein kinase required for degradation of Nrg1p; mutants are sensitive to growth on hydrogen peroxide medium; induced by alpha pheromone in SpiderM medium; rat catheter and Spider biofilm induced	1.10394	1.94168e-14	0.87471	1.51868e-09	TRUE	FALSE	dal81-specific Repression Gene
C1_10800C_A	ALP1	Cystine transporter; present in pathogenic yeasts (no human or murine homolog); Spider biofilm induced	-1.3035	1.59403e-39	-1.74625	1.75968e-69	FALSE	TRUE	stp2-specific Activation Gene
CR_07710W_A	ARO2	Putative chorismate synthase; fungal-specific (no human or murine homolog); protein level decreased in stationary phase yeast cultures; GlcNAc-induced protein	1.65198	3.90939e-58	1.73143	1.04306e-63	FALSE	TRUE	stp2-specific Repression Gene
C2_04200W_A	TBF1	Essential transcription factor; induces ribosomal protein genes and the rDNA locus; acts with Cbf1 at subset of promoters; recruits Fhl1 and Ifh1 to promoters; role is analogous to that of S. cerevisiae Rap1; Spider biofilm induced	1.45447	1.31248e-21	1.53364	6.98671e-24	TRUE	TRUE	Coordinated Repression Gene
C5_01910W_A	GIS2	Translational activator for mRNAs with internal ribosome entry sites; induced in high iron; repressed by yeast-hypha switch; null exhibits sensitivity to sorbitol, 5-fluorocytosine, and cold temperatures; Spider biofilm repressed	1.45403	1.29251e-23	1.31995	1.0696e-19	TRUE	FALSE	dal81-specific Repression Gene
CR_08500W_A	CAWG_02137	Ortholog(s) have unfolded protein binding activity and role in protein import into nucleus, ribosomal large subunit biogenesis	2.51213	1.68809e-50	2.50216	4.33276e-50	FALSE	TRUE	stp2-specific Repression Gene
C3_02630C_A	CAWG_02586	Protein of unknown function; Hog1p-repressed; Spider biofilm induced	1.43209	3.26741e-59	1.64792	4.27129e-78	TRUE	FALSE	dal81-specific Repression Gene
C3_03370C_A	CAWG_02659	Protein of unknown function; flow model biofilm induced; Spider biofilm induced; regulated by Sef1, Sfu1, and Hap43	1.97786	4.67233e-136	2.15343	2.6761e-161	TRUE	FALSE	dal81-specific Repression Gene
C1_09080C_A	PGA6	GPI-anchored cell wall adhesin-like protein; induced by high iron; upregulated upon Als2 depletion; mRNA binds She3 and is localized to hyphal tips; Spider biofilm repressed	1.41866	6.97702e-22	1.47478	1.50587e-23	FALSE	TRUE	stp2-specific Repression Gene
C4_00670W_A	TOK1	Outwardly rectifying, noisily gated potassium channel; modulates sensitivity to human salivary histatin (Hst5); very similar to S. cerevisiae Tok1p; Bcr1-repressed in RPMI a/a biofilms	1.52874	3.12628e-28	1.37218	5.48269e-23	TRUE	FALSE	dal81-specific Repression Gene
C7_03560W_A	CAWG_05687	Protein of unknown function; expression decreases by benomyl treatment or in an azole-resistant strain overexpressing MDR1; Spider biofilm induced	5.81696	2.48669e-170	5.27374	4.97109e-140	TRUE	FALSE	dal81-specific Repression Gene
C7_00160C_A	CAWG_05373	Ortholog(s) have role in ribosomal large subunit biogenesis and cytoplasm, nucleus localization	3.30392	3.66883e-75	2.87877	2.27668e-57	TRUE	FALSE	dal81-specific Repression Gene
CR_08490W_A	TSR1	Component of 20S pre-rRNA processing unit; repressed by prostaglandins	2.22243	3.72989e-38	2.03378	3.5463e-32	TRUE	FALSE	dal81-specific Repression Gene
C1_00990C_A	NMA111	Putative serine protease and general molecular chaperone; macrophage-induced gene; repressed in core stress response; merged with orf19.3288.1 in Assembly 21	1.79664	1.89605e-26	1.85308	4.60728e-28	FALSE	TRUE	stp2-specific Repression Gene
CR_00200W_A	PCK1	Phosphoenolpyruvate carboxykinase; glucose, C-source, yeast-hypha, Hap43 regulated; fluconazole, phagocytosis, H2O2, oral candidasis, Spider/rat catheter/flow model biofilm induced; repressed in biofilm by Bcr1, Tec1, Ndt80, Rob1, Brg1	-3.27642	2.73339e-89	-3.52577	3.22896e-103	TRUE	TRUE	Synergistic Activation Gene
C2_06680W_A	FRP3	Putative ammonium transporter; upregulated in the presence of human neutrophils; fluconazole-downregulated; repressed by nitric oxide; Spider biofilm induced; rat catheter biofilm repressed	-0.0959251	0.690801	1.05682	9.70443e-07	TRUE	TRUE	stp2-specific Repression Gene
C2_01010W_A	HGT8	High-affinity glucose transporter of the major facilitator superfamily; 20 members in the C. albicans glucose transporter family; 12 probable membrane-spanning segments; gene has intron; expressed in rich medium; flow model biofilm induced	2.25754	8.41134e-67	2.63716	1.00769e-90	TRUE	FALSE	dal81-specific Repression Gene
CR_04440C_A	RBR1	Glycosylphosphatidylinositol (GPI)-anchored cell wall protein; required for filamentous growth at acidic pH; expression repressed by Rim101 and activated by Nrg1; Hap43-induced	1.44698	2.37561e-15	3.26756	4.85447e-73	TRUE	TRUE	Coordinated Repression Gene
C2_00260C_A	MUQ1	Putative choline phosphate cytidylyltransferase/phosphoethanolamine cytidylyltransferase; repressed in hyphae compared vs yeast; Hap43-repressed; flow model biofilm induced; Spider biofilm repressed	-1.23798	1.10458e-29	-1.32768	7.20307e-34	TRUE	FALSE	dal81-specific Activation Gene
C1_13480W_A	HSP70	Putative hsp70 chaperone; role in entry into host cells; heat-shock, amphotericin B, cadmium, ketoconazole-induced; surface localized in yeast and hyphae; antigenic in host; farnesol-downregulated in biofilm; Spider biofilm induced	-2.51385	2.00741e-08	-3.25667	2.84919e-13	TRUE	FALSE	dal81-specific Activation Gene
C2_06420C_A	RTS1	Putative serine/threonine-protein phosphatase B-type regulatory subunit; transcription is regulated upon yeast-hyphal switch	-1.39128	4.83015e-21	-1.57152	1.84189e-26	FALSE	TRUE	stp2-specific Activation Gene
C2_03270W_A	GPM1	Phosphoglycerate mutase; surface protein that binds host complement Factor H and FHL-1; antigenic; fluconazole, or amino acid starvation (3-AT) induced, farnesol-repressed; Hap43, flow model biofilm induced; Spider biofilm repressed	-1.6747	2.76334e-29	-0.913817	1.1925e-09	TRUE	TRUE	dal81-specific Activation Gene
CR_06330C_A	CAWG_01942	Ortholog of S. cerevisiae : YML108W, C. glabrata CBS138 : CAGL0J06666g, C. dubliniensis CD36 : Cd36_31830, C. parapsilosis CDC317 : CPAR2_204870 and Candida tenuis NRRL Y-1498 : CANTEDRAFT_115607	2.04646	1.04622e-44	2.07551	6.16734e-46	FALSE	TRUE	stp2-specific Repression Gene
C7_00280W_A	HGT12	Glucose, fructose, mannose transporter; major facilitator superfamily; role in macrophage-induced hyphal growth; detected at germ tube plasma membrane by mass spectrometry; Snf3p-induced; 12 probable transmembrane segments	1.40054	1.82505e-19	2.61513	1.03189e-64	FALSE	TRUE	stp2-specific Repression Gene
C1_01990W_A	HSP30	Putative heat shock protein; fluconazole repressed; amphotericin B induced; Spider biofilm induced; rat catheter biofilm induced	2.35008	8.41926e-26	-0.541271	0.0238024	TRUE	FALSE	dal81-specific Repression Gene
C2_01700C_A	HAP42	Predicted transcription factor; possibly an essential gene, disruptants not obtained by UAU1 method	-1.56951	7.54614e-29	-1.40543	1.93781e-23	TRUE	FALSE	dal81-specific Activation Gene
C1_10450W_A	GLY1	L-threonine aldolase; complements glycine auxotrophy of S. cerevisiae shm1 shm2 gly1-1 triple mutant; macrophage/pseudohyphal-induced; the GLY1 locus has an RFLP and is triploid in strain SGY269; flow model biofilm induced	-0.92998	2.13441e-13	-1.53982	1.99724e-34	TRUE	TRUE	stp2-specific Activation Gene
CR_04690C_A	tS(GCU)2	tRNA-Ser, predicted by tRNAscan-SE; GCU anticodon	7.24465	1.40505e-05	7.72948	3.35623e-06	FALSE	TRUE	stp2-specific Repression Gene
C1_10400C_A	FGR41	Putative GPI-anchored adhesin-like protein; transposon mutation affects filamentous growth; Spider biofilm repressed	1.35891	5.41115e-38	1.37122	1.1979e-38	FALSE	TRUE	stp2-specific Repression Gene
C1_05630C_A	CAWG_00842	Putative karyopherin beta; repressed by nitric oxide	1.12702	3.84769e-13	1.36895	9.10942e-19	TRUE	TRUE	Coordinated Repression Gene
C2_09060C_A	ASN1	Putative asparagine synthetase; soluble protein in hyphae; regulated by Rim101; decreased expression at pH 4 vs pH 8; protein detected during exponential and stationary phases of yeast-form growth	2.09026	3.57239e-47	1.72661	1.27258e-32	FALSE	TRUE	stp2-specific Repression Gene
C1_03230C_A	ARX1	Putative ribosomal large subunit biogenesis protein; repressed in core stress response; repressed by prostaglandins	2.50725	2.79401e-51	2.67925	2.47987e-58	FALSE	TRUE	stp2-specific Repression Gene
C1_04330W_A	RPN4	C2H2 transcription factor; putative regulator of proteasome genes; DNA recognition sequence (GAAGGCAAAA) enriched in regions upstream of proteasome genes; induced in core stress response; Hap43-induced; Spider biofilm induced	1.82762	9.3635e-27	1.79268	8.38466e-26	TRUE	FALSE	dal81-specific Repression Gene
C7_01030C_A	CAWG_05461	Ortholog(s) have nucleus localization	2.70127	2.79489e-63	2.16787	3.06274e-41	FALSE	TRUE	stp2-specific Repression Gene
C5_04490C_A	CAR1	Arginase; arginine catabolism; transcript regulated by Nrg1, Mig1, Tup1; colony morphology-related regulation by Ssn6; alkaline induced; protein decreased in stationary phase; sumoylation target; flow model biofilm induced	-5.2371	0	-3.47505	1.13328e-284	TRUE	TRUE	Synergistic Activation Gene
C1_05170C_A	CUE5	Predicted ubiquitin-binding protein; rat catheter biofilm repressed	-1.28719	8.98452e-18	-1.41901	2.6457e-21	FALSE	TRUE	stp2-specific Activation Gene
C5_01100C_A	CLN3	G1 cyclin; depletion abolishes budding and causes hyphal growth defects; farnesol regulated, functional in S. cerevisiae; possibly essential (UAU1 method); other biofilm induced; Spider biofilm induced	1.64261	2.67636e-26	2.17753	2.98798e-45	TRUE	TRUE	Coordinated Repression Gene
C3_07330W_A	CAWG_03042	Predcted glucose 1-dehydrogenase (NADP+); rat catheter biofilm repressed	-2.18542	2.46993e-44	-2.262	4.38949e-47	FALSE	TRUE	stp2-specific Activation Gene
C4_02740W_A	CAWG_03524	Protein of unknown function; flow model, rat catheter and Spider biofilm induced; Hap43-repressed	1.04859	7.67019e-07	1.77328	3.21479e-17	TRUE	FALSE	dal81-specific Repression Gene
C5_04560C_A	CUP1	Metallothionein; involved in copper resistance; copper induced; Spider biofilm induced; flow model biofilm repressed	-1.58414	4.55724e-08	-1.68887	5.29445e-09	TRUE	FALSE	dal81-specific Activation Gene
C1_13080W_A	OP4	Ala- Leu- and Ser-rich protein; secreted; N-terminal hydrophobic region; possible glycosylation; opaque-specific transcript; repressed by alpha pheromone in opaque MTLa homozygotes; fluconazole-induced; Spider biofilm induced	2.02825	5.11459e-29	1.46567	8.70119e-16	FALSE	TRUE	stp2-specific Repression Gene
CR_10320W_A	CAWG_02291	Protein of unknown function; fluconazole-repressed; Spider biofilm induced	3.73181	7.49013e-62	2.98482	5.94345e-40	TRUE	FALSE	dal81-specific Repression Gene
CR_00930W_A	ATO10	Putative fungal-specific transmembrane protein; rat catheter and Spider biofilm induced	4.35063	1.48338e-84	5.43174	1.22643e-131	FALSE	TRUE	stp2-specific Repression Gene
CR_01930C_A	BIO2	Putative biotin synthase; induced by high iron; repressed by ciclopirox olamine; upregulated in clinical isolates from HIV+ patients with oral candidiasis; Hap43-repressed; Spider biofilm induced	2.46922	8.82279e-41	2.45367	2.8556e-40	TRUE	TRUE	Coordinated Repression Gene
C3_07660W_A	CAWG_03072	Protein similar to S. cerevisiae Rad4p; down-regulation associated with azole resistance	1.5353	8.40953e-55	1.64141	1.88307e-62	FALSE	TRUE	stp2-specific Repression Gene
C4_04050C_A	RHD3	GPI-anchored yeast-associated cell wall protein; induced in high iron; clade-associated gene expression; not essential for cell wall integrity; fluconazole-repressed; flow model and Spider biofilm repressed	-2.54627	2.92825e-24	-2.92341	1.58717e-31	TRUE	TRUE	Synergistic Activation Gene
C7_01810W_A	RVB2	Putative trancription modulator; RuvB-like protein family member; heterozygous null mutant displays sensitivity to virgineone	1.00429	3.88529e-23	0.590409	7.656e-09	TRUE	TRUE	dal81-specific Repression Gene
C1_07120W_A	GAP4	High-affinity S-adenosylmethionine permease; required for SAM-induced morphogenesis; hyphal induced; regulated by Hap43, Gcn2 and Gcn4; colony morphology-related gene regulation by Ssnp	2.29404	1.72829e-32	1.95376	6.27578e-24	TRUE	TRUE	Coordinated Repression Gene
C2_09710C_A	CAWG_06044	Ortholog of S. cerevisiae/S. pombe Lsb5; predicted role in actin cortical patch localization, actin filament organization, endocytosis; flow model biofilm induced; Spider biofilm repressed	-1.87347	1.09502e-27	-2.17865	7.18669e-37	TRUE	FALSE	dal81-specific Activation Gene
C3_02640C_A	ZCF1	Zn(II)2Cys6 transcription factor; transcript regulated during hypha formation; 5-UTR intron; mutants show decreased colonization of mouse kidneys; flow model biofilm induced; Spider biofilm induced	1.46688	4.02247e-42	1.45795	1.3022e-41	TRUE	TRUE	Coordinated Repression Gene
C6_03960W_A	CAWG_04978	Putative dipeptidyl-peptidase III; protein detected by mass spec in exponential and stationary phase cultures; Hog1p-induced; clade-associated gene expression	-2.58612	5.31428e-57	-2.11742	1.01432e-38	FALSE	TRUE	stp2-specific Activation Gene
CR_05480W_A	CAWG_01871	Ortholog(s) have dicarboxylic acid transmembrane transporter activity, role in mitochondrial transport and mitochondrial inner membrane localization	-0.673765	3.29497e-15	-1.30373	4.70308e-53	FALSE	TRUE	stp2-specific Activation Gene
C6_03850C_A	IHD1	GPI-anchored protein; alkaline, hypha-induced; regulated by Nrg1, Rfg1, Tup1 and Tsa1, Tsa1B in minimal media at 37; oralpharyngeal candidasis induced ; Spider biofilm induced; regulated in Spider biofilms by Tec1, Efg1, Ndt80, Rob1, Brg1	-4.48877	3.2894e-85	-3.24763	2.4182e-45	TRUE	TRUE	Synergistic Activation Gene
C5_04110W_A	SCW11	Cell wall protein; repressed in ace2 mutant; repressed in core caspofungin response; induced in high iron; possibly an essential gene, disruptants not obtained by UAU1 method; rat catheter and Spider biofilm repressed	2.09848	2.46882e-72	2.19016	1.16695e-78	TRUE	FALSE	dal81-specific Repression Gene
CR_02920C_A	AQY1	Aquaporin water channel; osmotic shock resistance, WT freeze tolerance; virulent in mice; flucytosine repressed; flow model/RPMI/Spider/rat catheter biofilm induced; required for RPMI biofilm formation; Bcr1-induced in a/a RPMI biofilms	4.59234	1.29533e-64	5.23344	1.61857e-83	TRUE	FALSE	dal81-specific Repression Gene
C2_06100W_A	PMT4	Protein mannosyltransferase; required for WT cell wall composition and virulence in mice; roles in hyphal growth and drug sensitivity; one of 5 family members; Axl2 a substrate; Spider biofilm repressed; Bcr1-repressed in RPMI a/a biofilm	-0.840407	5.29511e-17	-1.0523	7.11734e-26	FALSE	TRUE	stp2-specific Activation Gene
CR_10550W_A	DRS1	Putative nucleolar DEAD-box protein; Hap43-induced; mutation confers hypersensitivity to 5-fluorouracil (5-FU), tubercidin (7-deazaadenosine); Tbf1-induced; repressed in core stress response	2.30603	1.24758e-42	2.3448	4.90075e-44	FALSE	TRUE	stp2-specific Repression Gene
CR_07050C_A	URA2	Putative bifunctional carbamoylphosphate synthetase-aspartate transcarbamylase; flucytosine induced; macrophage/pseudohyphal-induced; 5-UTR intron; flow model biofilm repressed	2.00635	5.27393e-44	2.15519	1.47597e-50	FALSE	TRUE	stp2-specific Repression Gene
C5_03910C_A	CAWG_04763	Ortholog of C. parapsilosis CDC317 : CPAR2_302980, C. dubliniensis CD36 : Cd36_53630, Pichia stipitis Pignal : PICST_32155 and Candida orthopsilosis Co 90-125 : CORT_0E05120	1.52487	0.0105767	1.15331	0.0571293	TRUE	FALSE	dal81-specific Repression Gene
C1_14120C_A	RBE1	Pry family cell wall protein; Rim101, Efg1, Ssn6, alkaline repressed; O-glycosylation; no GPI anchor predicted; ketoconazol induced; regulated by Sef1, Sfu1, Hap4; flow model biofilm induced; rat catheter and Spider biofilm repressed	3.84973	3.66724e-180	4.00189	1.14987e-194	TRUE	TRUE	Coordinated Repression Gene
C2_09940W_A	GCN4	bZIP transcription factor; amino acid control response; required for Efg1-dependent pseudohyphal induction by amino acid starvation, not by serum; human whole blood and PMN induced; required for biofilm formation; Spider biofilm induced	3.4678	8.81409e-239	3.07108	2.6407e-187	TRUE	TRUE	Coordinated Repression Gene
C5_01580C_A	CEF3	Translation elongation factor 3; antigenic in humans; predicted C-term nucleotide-binding active site; protein on surface of yeast, not hyphae; polystyrene adherence induced; higher protein amount in stationary phase; possibly essential	1.41383	1.31688e-19	1.45911	8.31517e-21	TRUE	TRUE	Coordinated Repression Gene
C3_07980C_A	orf19.6192	Protein of unknown function; Plc1-regulated; transcript detected in high-resolution tiling arrays	1.71864	1.8932e-09	1.82852	1.55453e-10	TRUE	TRUE	Coordinated Repression Gene
C1_02520W_A	SCW4	Putative cell wall protein; substrate for Kex2p processing in vitro; expression regulated by white-opaque switch; alkaline repressed; possibly essential (UAU1 method); flow model biofilm induced; Spider biofilm induced	2.35866	1.10666e-22	2.0494	1.88083e-17	TRUE	TRUE	Coordinated Repression Gene
C1_11670W_A	CAWG_00270	Protein of unknown function; induced in core stress response; Gcn2 and Gcn4 regulated; flow model biofilm induced; Spider biofilm induced	-1.41517	1.76121e-15	-1.72955	1.81733e-22	TRUE	FALSE	dal81-specific Activation Gene
C1_02590C_A	SNZ1	Stationary phase protein; vitamin B synthesis; induced byyeast-hypha switch, 3-AT or in azole-resistant strain overexpressing MDR1; soluble in hyphae; regulated by Gcn4, macrophage; Spider biofilm induced; rat catheter biofilm repressed	-0.633191	2.10384e-06	-1.16597	1.07853e-18	TRUE	TRUE	stp2-specific Activation Gene
C6_00120W_A	CAWG_05345	Ortholog of S. cerevisiae : MRX7, C. glabrata CBS138 : CAGL0K04785g, C. dubliniensis CD36 : Cd36_19820, C. parapsilosis CDC317 : CPAR2_603375 and Candida tenuis NRRL Y-1498 : CANTEDRAFT_116290	-0.384539	0.154163	1.18191	2.84648e-06	TRUE	TRUE	stp2-specific Repression Gene
CR_05520W_A	NOC2	Putative nucleolar complex protein; Hap43-induced; transposon mutation affects filamentous growth; mutation confers hypersensitivity to 5-fluorouracil (5-FU), tubercidin (7-deazaadenosine); repressed in core stress response	2.47681	2.15549e-49	2.51098	1.03038e-50	FALSE	TRUE	stp2-specific Repression Gene
C6_00070C_A	PGA25	Putative GPI-anchored adhesin-like protein; fluconazole-downregulated; induced in oralpharyngeal candidasis; Spider biofilm induced	1.1661	8.82646e-10	1.49876	2.54303e-15	TRUE	TRUE	Coordinated Repression Gene
CR_01430W_A	CAWG_01495	Ortholog of S. cerevisiae Gpa15; involved in the synthesis of glycosylphosphatidylinositol (GPI) anchors; shuman Pig-H, which is also involved in GPI assembly; Spider biofilm induced	-1.12258	5.76175e-12	-1.16404	9.26681e-13	TRUE	FALSE	dal81-specific Activation Gene
C4_04530C_A	PHR1	Cell surface glycosidase; may act on cell-wall beta-1,3-glucan prior to beta-1,6-glucan linkage; role in systemic, not vaginal virulence (neutral, not low pH); high pH or filamentation induced; Bcr1-repressed in RPMI a/a biofilm	-3.44619	1.19473e-224	-2.53323	2.25704e-124	TRUE	FALSE	dal81-specific Activation Gene
C6_01060C_A	CAN2	Basic amino acid permease; arginine metabolism; regulated by Nrg1/Tup1; caspofungin, flucytosine induced; colony morphology-related regulation by Ssn6; Hap43-repressed; rat catheter and Spider biofilm induced; promoter bound by Efg1	-4.0257	3.25341e-206	-4.22359	1.01766e-225	TRUE	TRUE	Synergistic Activation Gene
CR_10690W_A	POP3	Putative RNase MRP and nuclear RNase P component; decreased repressed by prostaglandins; Spider biofilm induced	3.09561	1.98422e-59	3.33836	6.82505e-69	TRUE	FALSE	dal81-specific Repression Gene
C5_05410C_A	ILV3	Dihydroxyacid dehydratase; repressed by nitric oxide; macrophage-induced protein; protein in exponential and stationary growth phase; Sef1, Sfu1p, Hap43-regulated; farnesol-repressed; flow model biofilm induced; Spider biofilm repressed	2.64824	2.03635e-72	2.3827	7.24095e-59	TRUE	TRUE	Coordinated Repression Gene
C4_00140C_A	HIS4	Multifunctional enzyme that catalyzes three steps of histidine biosynthesis, with phosphoribosyl-AMP cyclohydrolase, phosphoribosyl-ATP diphosphatase, and histidinol dehydrogenase activities; required for wild-type adhesion to human calls	2.13415	1.02197e-80	1.99935	5.45444e-71	TRUE	FALSE	dal81-specific Repression Gene
C3_00220W_A	HGT19	Putative MFS glucose/myo-inositol transporter; 20 member family; 12 transmembrane segments, extended N terminus; expressed in rich medium; Hap43, phagocytosis, rat catheter, Spider and flow model biofilm induced	-1.3437	8.79647e-17	-1.39497	5.44982e-18	TRUE	TRUE	Synergistic Activation Gene
C1_08320W_A	TKL1	Putative transketolase; localizes to surface of yeast cells, not hyphae; soluble protein in hyphae; transcript regulated by Nrg1, Mig1, and Tup1; antigenic in human or murine infection; possibly essential (by UAU1 method)	-1.26404	6.05721e-17	-1.32821	1.4119e-18	TRUE	TRUE	Synergistic Activation Gene
CR_08300C_A	CAWG_02118	Putative patatin-like phospholipase; similar to S. cerevisiae Nte1p, which is predicted to be a membrane protein; antigenic during human oral infection; Hap43p-repressed gene	-1.62984	1.77979e-41	-1.70052	5.5125e-45	FALSE	TRUE	stp2-specific Activation Gene
C1_06850W_A	PCL7	Putative cyclin-like protein; possible Pho85 cyclin; hyphal repressed; induced by Mnl1 under weak acid stress	-1.29541	4.55778e-16	-1.42443	4.01889e-19	TRUE	TRUE	Synergistic Activation Gene
CR_08720W_A	orf19.6449	Ortholog of C. dubliniensis CD36 : Cd36_34310	1.77228	1.06498e-42	1.54209	2.36074e-32	TRUE	TRUE	Coordinated Repression Gene
C1_05330C_A	CAWG_00868	Predicted SCF ubiquitin ligase complex protein; Spider biofilm induced; rat catheter biofilm induced	1.25678	5.62387e-20	1.40917	8.40769e-25	TRUE	TRUE	Coordinated Repression Gene
C5_00210C_A	BRE1	Putative transcription factor with C3HC4 zinc finger DNA-binding motif; similar to S. cerevisiae Bre1p; transposon mutation affects filamentous growth	1.38729	3.33493e-40	1.25217	5.43619e-33	TRUE	TRUE	Coordinated Repression Gene
CR_05990C_A	SFL1	Transcription factor involved in negative regulation of morphogenesis, flocculation and virulence; induced in core caspofungin response; Spider biofilm induced	1.45069	1.59542e-15	1.43928	2.62725e-15	FALSE	TRUE	stp2-specific Repression Gene
CR_09880W_A	DEF1	RNA polymerase II regulator; role in filamentation, epithelial cell escape, dissemination in RHE model; induced by fluconazole, high cell density; Efg1/hyphal regulated; role in adhesion, hyphal growth on solid media; Spider biofilm induced	0.933119	0.000196719	1.15829	3.35387e-06	TRUE	TRUE	stp2-specific Repression Gene
C6_00750C_A	PGK1	Phosphoglycerate kinase; localizes to cell wall and cytoplasm; antigenic in murine/human infection; flow model biofilm, Hog1-, Hap43-, GCN-induced; repressed upon phagocytosis; repressed in Spider biofilms by Bcr1, Ndt80, Rob1, Brg1	-1.81263	6.67805e-17	-0.861258	9.09597e-05	TRUE	TRUE	dal81-specific Activation Gene
CR_05050W_A	GLN1	Putative glutamate synthase; regulated by Tsa1, Tsa1B under H2O2 stress conditions; Spider biofilm induced	1.07262	6.72637e-14	0.894443	4.60157e-10	TRUE	TRUE	dal81-specific Repression Gene
C4_02640C_A	SEN2	Putative tRNA splicing endonuclease subunit; mutation confers hypersensitivity to toxic ergosterol analog and to amphotericin B; 5-UTR intron; Hap43-induced; Spider biofilm induced	2.24815	2.67605e-32	2.37636	6.10275e-36	FALSE	TRUE	stp2-specific Repression Gene
C5_00480C_A	SEC14	Essential protein; functional homolog of S. cerevisiae Sec14p, a Golgi phosphatidylinositol/phosphatidylcholine transfer protein that regulates choline-phosphate cytidyltransferase and thereby affects secretion; biofilm-regulated	1.19828	1.69531e-11	1.01199	1.44075e-08	TRUE	FALSE	dal81-specific Repression Gene
C1_01690C_A	LSC1	Putative succinate-CoA ligase subunit; induced by high iron; fluconazole-induced; protein present in exponential and stationary growth phase yeast cultures; Spider biofilm repressed	-1.08047	5.76347e-29	-1.17877	3.18449e-34	TRUE	TRUE	Synergistic Activation Gene
C5_03600W_A	MDJ1	Putative member of the HSP40 (DnaJ) family of chaperones; rat catheter and Spider biofilm induced	-1.2394	2.09776e-26	-1.47211	1.18503e-36	FALSE	TRUE	stp2-specific Activation Gene
CR_04170W_A	CAWG_01754	Ortholog(s) have rRNA (cytosine-C5-)-methyltransferase activity and role in assembly of large subunit precursor of preribosome, maturation of LSU-rRNA from tricistronic rRNA transcript (SSU-rRNA, 5.8S rRNA, LSU-rRNA), rRNA base methylation	2.24344	8.22625e-45	2.41745	8.21692e-52	FALSE	TRUE	stp2-specific Repression Gene
C3_07470W_A	CAWG_03056	Putative plasma membrane protein; predicted role in cell wall integrity; regulated by Nrg1, Tup1; induced during chlamydospore formation in both C. albicans and C. dubliniensis	-1.47899	4.56518e-23	-0.755528	4.25256e-07	TRUE	TRUE	dal81-specific Activation Gene
C4_07090C_A	TRP4	Predicted enzyme of amino acid biosynthesis; upregulated in biofilm; regulated by Gcn2p and Gcn4p; S. cerevisiae ortholog is Gcn4p regulated	2.4088	1.24134e-74	2.39916	5.02896e-74	FALSE	TRUE	stp2-specific Repression Gene
C7_04180W_A	FAA2-3	Predicted acyl CoA synthetase	-2.43418	6.7193e-66	-2.55068	3.9813e-72	FALSE	TRUE	stp2-specific Activation Gene
C3_07750W_A	UTP9	Small-subunit processome protein; Ssr1-induced; repressed by prostaglandins; physically interacts with TAP-tagged Nop1	2.52482	7.70747e-43	2.52357	8.39902e-43	TRUE	TRUE	Coordinated Repression Gene
C4_06610C_A	SDH12	Succinate dehydrogenase; soluble protein in hyphae; macrophage-downregulated protein level; downregulated by Efg1p; repressed by nitric oxide; protein present in exponential and stationary growth phase yeast cultures; Hap43p-repressed gene	-1.26229	1.68694e-28	-1.17226	9.04092e-25	FALSE	TRUE	stp2-specific Activation Gene
C1_05910W_A	SIP5	Protein of unknown function; flow model, rat catheter and Spider biofilm induced	-1.65635	9.84779e-77	-1.43479	2.90978e-58	TRUE	FALSE	dal81-specific Activation Gene
C4_07200C_A	CAWG_03110	Putative lipid phosphatase of the endoplasmic reticulum; role in DNA repair, actin cytoskeleton organization, cellular manganese ion homeostasis; Spider biofilm repressed	-1.72634	8.49291e-26	-1.59382	3.26428e-22	TRUE	TRUE	Synergistic Activation Gene
C1_09300C_A	CAWG_00499	Has domain(s) with predicted metal ion binding activity	9.85334	1.23146e-101	9.62668	4.95264e-97	TRUE	FALSE	dal81-specific Repression Gene
CR_07060C_A	CRZ2	C2H2 transcription factor, involved in regulation of early adaptation to murine GI tract; Rim101-repressed at pH 8; required for yeast cell adherence to silicone substrate; Spider biofilm induced	2.94446	1.79362e-42	2.54604	4.28456e-32	TRUE	FALSE	dal81-specific Repression Gene
C2_10740C_A	CAWG_06135	Protein with a predicted role in cell wall integrity; repressed in core stress response	2.01676	3.86263e-37	2.05093	2.29943e-38	TRUE	TRUE	Coordinated Repression Gene
C1_01360C_A	CAWG_01240	Putative glycogen synthesis initiator; regulated by Efg1 and Efh1; Hog1-repressed; colony morphology-related gene regulation by Ssn6; induced by prostaglandins; flow model biofilm induced	0.769365	2.56207e-11	1.43798	2.40468e-36	FALSE	TRUE	stp2-specific Repression Gene
C4_02390W_A	PGA62	Adhesin-like cell wall protein; putative GPI-anchor; fluconazole-induced; induced in high iron; induced during cell wall regeneration; Cyr1 or Ras1 repressed; Tbf1 induced	0.997054	6.59725e-13	1.99533	1.05758e-47	TRUE	TRUE	stp2-specific Repression Gene
C1_08960W_A	snR190	C/D box small nucleolar RNA (snoRNA)	1.87235	1.3909e-17	2.36229	2.40766e-27	FALSE	TRUE	stp2-specific Repression Gene
C1_11730W_A	CAWG_00264	Protein with SEL-1 like protein domain; early-stage flow model biofilm induced	-1.23126	4.12115e-17	-1.30665	4.34332e-19	FALSE	TRUE	stp2-specific Activation Gene
CR_07240C_A	CLG1	Putative cyclin-like protein; transcription is regulated upon yeast-hyphal switch	1.07742	1.15713e-06	1.46948	2.48793e-11	TRUE	FALSE	dal81-specific Repression Gene
C7_01430C_A	orf19.6586	Protein of unknown function; transcript induced by benomyl or in azole-resistant strain overexpressing MDR1; Ssn6 colony morphology-related regulation; induced by NO; Hap43-repressed; rat catheter and flow model biofilm induced	3.44107	6.07267e-185	2.36927	1.06297e-87	TRUE	FALSE	dal81-specific Repression Gene
C1_05160C_A	CAWG_00882	Putative phosphatidyl synthase; stationary phase enriched protein; transcript repressed by yeast-hypha switch; Hap43-repressed; rat catheter, Spider and flow model biofilm induced	-4.43533	6.1601e-72	-4.24324	5.41241e-66	TRUE	FALSE	dal81-specific Activation Gene
C4_01100C_A	AGP2	Amino acid permease; hyphal repressed; white-opaque switch regulated; induced in core caspofungin response, during cell wall regeneration, by flucytosine; regulated by Sef1, Sfu1, and Hap43; rat catheter and Spider biofilm induced	-1.30134	2.83512e-06	-0.390155	0.180521	TRUE	TRUE	dal81-specific Activation Gene
C1_07160C_A	CAWG_00700	Protein conserved among the CTG-clade; 2 adjacent upstream SRE-1 elements; highly up-regulated in cecum-grown cells in a Cph2-dependent manner; Hap43-repressed; rat catheter, Spider and flow model biofilm induced	-4.84837	3.29125e-85	-5.00895	1.08028e-90	TRUE	FALSE	dal81-specific Activation Gene
C6_00290W_A	CAWG_05329	Protein of unknown function; regulated by yeast-hypha switch; induced by Mnl1 in weak acid stress; 5 UTR intron; repressed by chlamydospore formation in C. albicans and C. dubliniensis; rat catheter, Spider and flow model biofilm induced	1.25387	1.29983e-07	0.990148	3.38754e-05	TRUE	FALSE	dal81-specific Repression Gene
C7_03880C_A	CAWG_05718	Protein required for virulence in reconstituted human epithelium (RHE) model of ex vivo infection; decreased transcription is observed upon fluphenazine treatment; induced upon adherence to polystyrene	1.50263	5.49019e-13	0.569899	0.00771325	TRUE	FALSE	dal81-specific Repression Gene
CR_00540C_A	MDH1	Mitochondrial malate dehydrogenase; regulated by Mig1, Tup1, white-opaque switch, phagocytosis; induced in high iron; antigenic during murine and human infection; repressed in Spider biofilms by Bcr1, Tec1, Ndt80, Rob1, Brg1	-2.95652	4.88736e-32	-3.18684	5.3537e-37	FALSE	TRUE	stp2-specific Activation Gene
CR_07950W_A	IMP4	Putative SSU processome component; Hap43-induced; repressed by prostaglandins; Spider biofilm induced	2.20789	1.414e-44	2.41241	5.9744e-53	TRUE	FALSE	dal81-specific Repression Gene
C1_00160C_A	CAWG_01349	Putative nucleolar protein with a predicted role in pre-rRNA processing and ribosome biogenesis; repressed by nitric oxide; required for flow model biofilm formation; Spider biofilm repressed	2.36369	2.58047e-37	2.48374	4.59321e-41	TRUE	TRUE	Coordinated Repression Gene
C3_05580C_A	GAP2	General broad specificity amino acid permease; ketoconazole, flucytosine repressed; Ssy1-dependent histidine induction; regulated by Nrg1, Tup1; colony morphology-related gene regulation by Ssn6; Spider and flow model biofilm induced	-0.551062	3.83244e-06	-7.14278	3.326e-223	TRUE	TRUE	stp2-specific Activation Gene
C1_13350W_A	STP2	Amino-acid-regulated transcription factor; activates transcription of amino acid permease genes; activated by amino-acid-induced proteolytic processing (Ssy1, Csh3 dependent); required for alkalinization of medium; Spider biofilm induced	-0.708473	9.63035e-10	-13.0663	1.77272e-103	TRUE	TRUE	stp2-specific Activation Gene
C7_02040C_A	CUP9	Transcription factor; represses SOK1 expression in response to farnesol inhibition; yeast-hypha switch repressed; ketoconazole-induced; Plc1-regulated; colony morphology-related Ssn6 regulation; Spider, flow model biofilm induced	3.36383	6.30331e-54	3.15184	1.70695e-47	TRUE	TRUE	Coordinated Repression Gene
C5_04080C_A	CAWG_04781	Putative splicing factor required for the first step of pre-mRNA splicing; Spider biofilm induced	1.31084	9.45565e-26	1.4086	1.50415e-29	TRUE	FALSE	dal81-specific Repression Gene
C5_04120C_A	CAWG_04785	Putative inositol oxygenase; mutation confers hypersensitivity to toxic ergosterol analog; Spider biofilm induced	1.95571	4.70331e-58	2.04796	1.59713e-63	TRUE	FALSE	dal81-specific Repression Gene
C3_02060W_A	CAWG_02533	Ortholog(s) have extracellular region localization	4.45342	1.56389e-83	4.32179	1.59717e-78	FALSE	TRUE	stp2-specific Repression Gene
C7_01920W_A	CDC34	Putative ubiquitin-protein ligase; transcript regulated by Nrg1 and Tup1, and by Gcn2 and Gcn4; rat catheter biofilm induced	1.46908	1.86275e-15	0.791393	2.32034e-05	TRUE	FALSE	dal81-specific Repression Gene
C1_02740C_A	CAWG_01109	Has domain(s) with predicted NAD+ binding activity	-0.945803	3.1244e-10	-1.11035	1.81766e-13	FALSE	TRUE	stp2-specific Activation Gene
C6_03180C_A	CAWG_05052	Ortholog(s) have protein binding, bridging, ubiquitin protein ligase binding activity, role in positive regulation of ubiquitin-dependent endocytosis, regulation of intracellular transport and early endosome, late endosome localization	1.33147	1.07802e-15	1.69907	9.5866e-25	TRUE	FALSE	dal81-specific Repression Gene
C2_00140W_A	NDT80	Ortholog of Ndt80; meiosis-specific transcription factor; activator of CDR1 induction by antifungal drugs; required for wild-type drug resistance and for Spider biofilm formation; transcript induced by antifungal drug treatment	2.17365	1.39063e-33	2.10499	1.37626e-31	TRUE	FALSE	dal81-specific Repression Gene
C2_05090W_A	MAK5	Putative nucleolar DEAD-box RNA helicase; oxidative stress-repressed via Cap1; repressed by prostaglandins	2.40393	1.17853e-60	2.43194	4.8867e-62	FALSE	TRUE	stp2-specific Repression Gene
C1_00170W_A	LEU4	Putative 2-isopropylmalate synthase; regulated by Nrg1, Mig1, Tup1, Gcn4; induced by human whole blood or PMNs; macrophage/pseudohyphal-repressed after 16h; Spider biofilm repressed	2.58504	2.44136e-50	1.8365	5.00607e-26	TRUE	TRUE	Coordinated Repression Gene
C1_07220W_A	CAWG_00694	Protein of unknown function; Plc1p-regulated; expression induced early upon infection of reconstituted human epithelium (RHE), while expression of the C. dubliniensis ortholog is not; mutant is viable; Spider biofilm induced	-2.01561	1.05138e-56	-1.48016	3.08703e-31	TRUE	TRUE	Synergistic Activation Gene
C4_03070W_A	PGA54	GPI-anchored protein; Hog1-repressed; induced in cyr1 or efg1 mutant or in hyphae; colony morphology-related gene regulation by Ssn6; induced in RHE model; mRNA binds She3; regulated in Spider biofilms by Tec1, Egf1, Ntd80, Rob1, Brg1	-1.87004	4.34464e-30	-1.34753	2.3699e-16	FALSE	TRUE	stp2-specific Activation Gene
C6_04130C_A	ALS4	GPI-anchored adhesin; role in adhesion, germ tube induction; growth, temperature regulated; expressed during infection of human buccal epithelial cells; repressed by vaginal contact; biofilm induced; repressed during chlamydospore formation	3.30905	3.61687e-126	3.26216	1.22545e-122	TRUE	TRUE	Coordinated Repression Gene
C5_04280C_A	GLN3	GATA transcription factor, involved in regulation of nitrogen starvation-induced filamentous growth; regulates transcription of Mep2 ammonium permease; regulated by Gcn2 and Gcn4; mRNA binds She3; Spider biofilm induced	1.04875	5.0117e-22	0.930911	1.24218e-17	TRUE	TRUE	dal81-specific Repression Gene
C1_02700C_A	CAWG_01113	Gene induced by hypoxia and ketoconazole; oral infection upregulated; mutants have reduced capacity to damage oral epithelial cells; Spider biofilm induced	-1.23807	4.35276e-18	-1.25477	1.51993e-18	TRUE	FALSE	dal81-specific Activation Gene
C2_06020W_A	CNT	CNT family H(+)/nucleoside symporter; transports adenosine, uridine, inosine, guanosine, tubercidin; variant alleles for high/low-affinity isoforms; S or G at residue 328 affects specificity; Spider, flow model biofilm induced	1.72366	3.25486e-22	1.13272	2.41561e-10	TRUE	TRUE	Coordinated Repression Gene
C1_05240C_A	RPT1	Putative 26S proteasome regulatory subunit 7; Hap43p-repressed gene; regulated by Gcn2p and Gcn4p; overlaps orf19.442	-1.01272	6.89397e-18	-1.04246	7.083e-19	TRUE	FALSE	dal81-specific Activation Gene
C3_05090C_A	CAWG_02821	Protein of unknown function; Hap43-repressed gene	-1.56656	4.50746e-32	-1.50532	1.00393e-29	FALSE	TRUE	stp2-specific Activation Gene
C1_09320C_A	CAWG_00497	Protein with a regulator of G-protein signaling domain; Plc1-regulated; Spider biofilm induced; rat catheter biofilm repressed	1.79709	1.24354e-11	1.8895	9.95306e-13	TRUE	FALSE	dal81-specific Repression Gene
C6_00720C_A	COX15	Cytochrome oxidase assembly protein; transcript regulated by Nrg1 and Tup1; alkaline repressed; Hap43-repressed; early-stage flow model biofilm induced; Spider biofilm repressed	-1.42538	3.83578e-79	-0.488036	1.39632e-10	TRUE	TRUE	dal81-specific Activation Gene
C1_02530C_A	DIP5	Dicarboxylic amino acid permease; mutation confers hypersensitivity to toxic ergosterol analog; induced upon phagocytosis by macrophage; Gcn4-regulated; upregulated by Rim101 at pH 8; rat catheter and Spider biofilm induced	-1.00399	6.30009e-19	-1.21452	4.29448e-27	TRUE	TRUE	Synergistic Activation Gene
C5_05320C_A	HIS1	ATP phosphoribosyl transferase; enzyme of histidine biosynthesis; acid upregulated/alkaline repressed by Rim101; regulated by Gcn2, Gcn4; strain CA9 is a his1 mutant; flow model biofilm induced; Spider biofilm repressed	2.10109	5.18152e-08	2.07561	7.72626e-08	FALSE	TRUE	stp2-specific Repression Gene
C4_00120W_A	PGA7	GPI-linked hyphal surface antigen; induced by ciclopirox olamine, ketoconazole, Rim101 at pH 8; Hap43, fluconazole; flow model biofilm induced; Spider biofilm induced; required for RPMI biofilm; Bcr1-induced in a/a biofilm	-1.45747	1.9205e-14	-1.02882	7.13689e-08	TRUE	TRUE	Synergistic Activation Gene
CR_08940W_A	orf19.7291	Ortholog(s) have tRNA (adenine-N1-)-methyltransferase activity, role in tRNA methylation and nucleus, tRNA (m1A) methyltransferase complex localization	1.63547	1.63969e-24	1.73489	1.95555e-27	FALSE	TRUE	stp2-specific Repression Gene
C2_05700W_A	OSM1	Putative flavoprotein subunit of fumarate reductase; soluble protein in hyphae; caspofungin repressed; stationary phase enriched protein; flow model biofilm induced; Spider biofilm repressed	-2.02534	3.30525e-25	-1.91113	1.32996e-22	TRUE	FALSE	dal81-specific Activation Gene
C1_04320W_A	GPM2	Putative phosphoglycerate mutase; repressed in hyphae; macrophage/pseudohyphal-repressed; induced by high levels of peroxide stress, farnesol; flow model biofilm induced; rat catheter and Spider biofilm repressed	-1.22743	6.10046e-12	-0.960242	8.02327e-08	TRUE	FALSE	dal81-specific Activation Gene
C1_03380W_A	TPS2	Trehalose-6-phosphate (Tre6P) phosphatase; mutant heat sensitive, accumulates Tre6P, decreased mouse virulence; possible drug target; 2 conserved phospohydrolase motifs; no mammalian homolog; Hap43-repressed; flow model biofilm induced	-1.75515	2.6913e-22	-1.65489	5.62265e-20	TRUE	TRUE	Synergistic Activation Gene
C2_04940C_A	ITR1	MFS inositol transporter; uptake of exogenous inositol; 12 transmembrane motifs; expressed in rich medium; fluconazole, caspofungin repressed; possibly essential (UAU1 method); flow model, rat catheter and Spider biofilm induced	-5.70207	7.60638e-77	-5.6159	1.39634e-74	FALSE	TRUE	stp2-specific Activation Gene
C7_02010C_A	CAWG_05551	Predicted aldehyde dehydrogenase [NAD(P)+]; Spider biofilm induced	1.19691	1.03586e-20	1.33669	1.45596e-25	FALSE	TRUE	stp2-specific Repression Gene
C3_04000C_A	CTN3	Peroxisomal carnitine acetyl transferase; no obvious metabolic, hyphal, virulence defects in Ura+ strain; induced by macrophage engulfment, hyphal growth, starvation, nonfermentable carbon sources; rat catheter, Spider biofilm induced	-1.07602	4.56293e-09	-0.398102	0.0351825	TRUE	FALSE	dal81-specific Activation Gene
C2_07340W_A	NOC4	Putative nucleolar protein; Hap43-induced; mutation confers resistance to 5-fluorocytosine (5-FC), 5-fluorouracil (5-FU), and tubercidin (7-deazaadenosine); Spider biofilm induced	3.11102	5.58826e-80	3.08719	9.31028e-79	FALSE	TRUE	stp2-specific Repression Gene
CR_00010C_A	CAWG_02345	Protein similarity to mutator-like element (MULE) transposase	3.29612	1.59879e-76	2.6192	1.08186e-48	TRUE	TRUE	Coordinated Repression Gene
C5_00140C_A	CAWG_04409	Putative integral membrane protein of unknown function; clade-associated gene expression; Spider biofilm induced	1.53085	4.3023e-21	2.15244	1.55453e-40	TRUE	FALSE	dal81-specific Repression Gene
C1_04390C_A	NOP4	Putative nucleolar protein; Hap43-induced; mutation confers hypersensitivity to 5-fluorocytosine (5-FC), 5-fluorouracil (5-FU), and tubercidin (7-deazaadenosine); represses in core stress response	2.56691	5.24494e-69	2.61138	2.30153e-71	TRUE	TRUE	Coordinated Repression Gene
C3_03710W_A	CCC1	Manganese transporter; required for normal filamentous growth; mRNA binds She3, localized to hyphal tips; repressed by NO, alkaline pH; colony morphology-related regulation by Ssn6; regulated by Sef1, Sfu1, Hap43; Spider biofilm induced	1.15725	1.86345e-36	1.33235	6.67156e-48	FALSE	TRUE	stp2-specific Repression Gene
C4_04520W_A	CAWG_03359	Ortholog(s) have enzyme activator activity, telomerase inhibitor activity, role in box C/D snoRNA 3-end processing, negative regulation of telomere maintenance via telomerase and nucleolus, nucleoplasm localization	2.00193	2.15384e-28	1.92756	1.99804e-26	FALSE	TRUE	stp2-specific Repression Gene
CR_08340W_A	CYS3	Cystathionine gamma-lyase; induced by alkaline, amphotericin B, cadmium stress, oxidative stress via Cap1; possibly adherence-induced; Hog1 regulated; reduced levels in stationary phase yeast cells; Spider and flow model biofilm induced	1.01552	5.76039e-06	0.990188	9.94333e-06	TRUE	TRUE	dal81-specific Repression Gene
C4_04660C_A	CAWG_03347	Ortholog(s) have thiol-dependent ubiquitin-specific protease activity and role in protein deubiquitination	-1.27913	3.15109e-26	-1.44753	4.54662e-33	FALSE	TRUE	stp2-specific Activation Gene
C5_01250W_A	GPR1	Plasma membrane G-protein-coupled receptor of the cAMP-PKA pathway; detects lactate and triggers signaling pathway that regulates beta-glucan masking and immune evasion; binds Gpa2; regulates HWP1 and ECE1; required for WT hyphal growth	-1.31915	7.47011e-14	-0.784462	1.04859e-05	TRUE	FALSE	dal81-specific Activation Gene
C5_03470C_A	CAWG_04720	Predicted membrane transporter, member of the L-amino acid transporter-3 (LAT3) family, major facilitator superfamily (MFS)	3.61204	1.18546e-74	3.34052	5.21238e-64	TRUE	FALSE	dal81-specific Repression Gene
C1_08330C_A	ADH2	Alcohol dehydrogenase; soluble in hyphae; expression regulated by white-opaque switching; regulated by Ssn6; indued by Mnl1 in weak acid stress; protein enriched in stationary phase yeast cultures; Spider biofilm induced	3.16887	3.66919e-32	3.774	4.61304e-45	TRUE	TRUE	Coordinated Repression Gene
C5_03900W_A	PGA56	Regulator of sorbose utilization; putative GPI-anchor; hypha and cell wall regeneration induced; colony morphology-related gene regulation by Ssn6; induced by Tbf1, Hap43; Spider biofilm induced	1.22824	3.11421e-17	1.56702	3.05674e-27	TRUE	TRUE	Coordinated Repression Gene
CR_08510W_A	PGA13	GPI-anchored cell wall protein involved in cell wall synthesis; required for normal cell surface properties; induced in oralpharyngeal candidasis; Spider biofilm induced; Bcr1-repressed in RPMI a/a biofilms	-1.43238	8.20002e-12	0.608482	0.00371128	TRUE	TRUE	dal81-specific Activation Gene
C4_04490C_A	snR18	C/D box small nucleolar RNA (snoRNA); snR18 is encoded within the intron of orf19.3838/EFB1	2.86381	5.537e-17	2.29101	3.40697e-11	TRUE	TRUE	Coordinated Repression Gene
C1_11480W_A	PHO84	High-affinity phosphate transporter; transcript regulated by white-opaque switch; Hog1, ciclopirox olamine or alkaline induced; caspofungin, stress repressed; required for normal TORC1 function	3.90568	2.31955e-16	1.17737	0.0164818	TRUE	FALSE	dal81-specific Repression Gene
C6_03760C_A	SHM2	Cytoplasmic serine hydroxymethyltransferase; complements glycine auxotrophy of S. cerevisiae shm1 shm2 gly1-1 mutant; antigenic; farnesol-upregulated in biofilm; stationary-phase enriched protein; rat catheter and Spider biofilm repressed	-1.0699	4.95074e-16	-0.690943	1.97167e-07	TRUE	TRUE	dal81-specific Activation Gene
C7_01510W_A	CAWG_05502	Predicted membrane transporter; vesicular neurotransmitter (VNT) family, major facilitator superfamily (MFS); repressed in core caspofungin response; induced in oralpharyngeal candidasis; Spider biofilm induced	-1.76768	4.27746e-55	-2.38668	1.99811e-98	TRUE	FALSE	dal81-specific Activation Gene
C6_00870C_A	ILV5	Ketol-acid reductoisomerase; antigenic; regulated by Gcn4; GlcNAc, amino acid starvation (3-AT)-induced; macrophage-repressed protein; protein present in exponential and stationary phase; flow model and Spider biofilm repressed	1.25368	7.8172e-13	1.07901	7.55931e-10	TRUE	TRUE	Coordinated Repression Gene
C2_05670C_A	CAWG_04313	Ortholog(s) have tRNA-intron endonuclease activity, role in tRNA-type intron splice site recognition and cleavage and tRNA-intron endonuclease complex localization	1.16424	7.17257e-18	1.13932	3.66972e-17	TRUE	FALSE	dal81-specific Repression Gene
C6_03840C_A	SNQ2	Protein similar to S. cerevisiae Snq2p transporter; member of PDR subfamily of ABC family; transposon mutation affects filamentation; benomyl-induced transcription; detected at yeast-form cell plasma membrane by mass spec	0.563588	5.36964e-07	1.15088	3.57074e-25	FALSE	TRUE	stp2-specific Repression Gene
C3_06870W_A	TDH3	NAD-linked glyceraldehyde-3-phosphate dehydrogenase; binds fibronectin, laminin; at cell surface; antigenic in infection; farnesol-repressed; stationary phase-enriched; GlcNAc-induced; flow model biofilm induced; Spider biofilm repressed	-1.78712	7.87083e-23	-1.24264	1.00613e-11	TRUE	TRUE	Synergistic Activation Gene
C1_03490W_A	CAWG_01036	Protein of unknown function; S. pombe ortholog SPAC17A2.02c plays a role in resistance to cadmium; colony morphology-related gene regulation by Ssn6; Spider biofilm repressed	-1.91789	8.53383e-50	-1.25062	4.44405e-22	TRUE	FALSE	dal81-specific Activation Gene
C1_06810W_A	CAT1	Catalase; resistance to oxidative stress, neutrophils, peroxide; role in virulence; regulated by iron, ciclopirox, fluconazole, carbon source, pH, Rim101, Ssn6, Hog1, Hap43, Sfu1, Sef1, farnesol, core stress response; Spider biofilm induced	-1.74106	1.47748e-11	-1.74638	1.26212e-11	TRUE	TRUE	Synergistic Activation Gene
C3_00880W_A	KGD1	Putative 2-oxoglutarate dehydrogenase; regulated by Efg1 under yeast but not hyphal growth conditions; transcript induced in an RHE model of oral candidiasis; stationary phase enriched protein; Hap43-repressed; rat catheter biofilm induced	-1.50953	2.77206e-84	-1.84863	9.76074e-126	FALSE	TRUE	stp2-specific Activation Gene
CR_07250C_A	CAWG_02023	Predicted long-chain-alcohol oxidase; Spider biofilm induced	-1.65765	1.78066e-25	-1.40816	8.80361e-19	FALSE	TRUE	stp2-specific Activation Gene
C3_06100C_A	DED1	Predicted ATP-dependent RNA helicase; RNA strand annealing activity; Spider biofilm induced	1.50683	6.32622e-10	1.25873	2.6348e-07	TRUE	TRUE	Coordinated Repression Gene
C1_08400C_A	GCV2	Glycine decarboxylase P subunit; protein of glycine catabolism; repressed by Efg1; Hog1-induced; induced by Rim101 at acid pH; transcript induced in elevated CO2; stationary phase enriched protein	-2.50244	2.99147e-39	-2.71101	8.16267e-46	TRUE	TRUE	Synergistic Activation Gene
C1_08310W_A	OPY2	Predicted transmembrane protein; role in cell wall biogenesis; required for Cek1 phosphorylation; Spider biofilm induced	1.2316	3.55549e-22	1.48277	1.37015e-31	FALSE	TRUE	stp2-specific Repression Gene
C4_06720W_A	NOP1	Nucleolar protein; flucytosine induced; Hap43-induced; Spider biofilm repressed	2.14184	1.08873e-31	2.15188	5.55291e-32	TRUE	TRUE	Coordinated Repression Gene
CR_05180C_A	SDH2	Succinate dehydrogenase, Fe-S subunit; localizes to surface of yeast cells, but not hyphae; induced in high iron and during log phase aerobic growth; repressed by nitric oxide, Hap43	-1.55518	3.78579e-46	-1.72073	4.07893e-56	FALSE	TRUE	stp2-specific Activation Gene
CR_08920W_A	CAWG_02170	Protein with predicted oxidoreductase and dehydrogenase domains; Hap43-repressed; Spider biofilm induced	-1.00503	9.31892e-07	-0.56755	0.00641053	TRUE	TRUE	dal81-specific Activation Gene
C2_03520C_A	ADAEC	Protein of unknown function; transcription is specific to white cell type	0.104836	0.557275	1.05363	8.30651e-11	TRUE	TRUE	stp2-specific Repression Gene
C6_00080C_A	CAWG_05349	Protein of unknown function; opaque-specific transcript; fluconazole-repressed; induced in cyr1 mutant and in oralpharyngeal candidasis; Spider biofilm induced	0.67452	0.00248865	1.34209	8.9859e-10	TRUE	TRUE	stp2-specific Repression Gene
CR_09920W_A	CAWG_02256	Predicted amino acid transport domain; transcript upregulated in clinical strains from HIV+ patients with oral candidiasis; alkaline upregulated by Rim101; rat catheter, Spider and flow model biofilm induced	-1.96303	1.01061e-54	-2.17389	9.57051e-67	TRUE	TRUE	Synergistic Activation Gene
CR_00150C_A	POT1	Putative peroxisomal 3-oxoacyl CoA thiolase; transcript regulated by Nrg1 and Mig1; farnesol regulated; Hap43-repressed	-1.73329	2.26187e-67	-1.57399	8.05476e-56	TRUE	TRUE	Synergistic Activation Gene
C3_04660C_A	ARG11	Putative ornithine transporter of the mitochondrial inner membrane; induced during the mating process	4.82951	6.11194e-195	4.77513	1.75283e-190	FALSE	TRUE	stp2-specific Repression Gene
C7_03220C_A	ZCF29	Zn(II)2Cys6 transcription factor; mutants sensitive to caffeine, menadione, beauvericin;resistant to fenpropimorph; Hap43-repressed; mutants have decreased CFU in mouse kidneys and defects in filamentous growth; Spider biofilm induced	1.9895	6.90679e-71	1.02666	8.06283e-20	FALSE	TRUE	stp2-specific Repression Gene
CR_05630W_A	DBP8	Protein similar to S. cerevisiae Dbp8p, an ATP-dependent helicase involved in rRNA processing; oxidative stress-repressed via Cap1p; flucytosine repressed; likely to be essential for growth, based on insertional mutagenesis	2.95535	1.70777e-77	2.97314	2.0739e-78	FALSE	TRUE	stp2-specific Repression Gene
C1_08070W_A	CDR4	Putative ABC transporter superfamily; fluconazole, Sfu1, Hog1, core stress response induced; caspofungin repressed; fluconazole resistance not affected by mutation or correlated with expression; rat catheter and flow model biofilm induced	-2.33725	5.89627e-15	-2.31254	1.12963e-14	TRUE	FALSE	dal81-specific Activation Gene
C5_03490C_A	CAWG_04722	Stationary phase enriched protein; predicted ORF from Assembly 19; removed from Assembly 20; subsequently reinstated in Assembly 21 based on comparative genome analysis	-1.23292	8.91038e-14	-1.37492	8.58782e-17	TRUE	FALSE	dal81-specific Activation Gene
CR_08310C_A	CAWG_02119	S. pombe ortholog SPBC460.04c is a predicted sulfonate/alpha-ketoglutare dioxygenase; induced by nitric oxide; Spider biofilm induced	-0.218036	0.590237	1.29739	0.000255601	TRUE	TRUE	stp2-specific Repression Gene
CR_04590C_A	PDX3	Pyridoxamine-phosphate oxidase; transcript regulated by yeast-hypha switch and by Nrg1, Mig1, Tup1; Hap43, caspofungin repressed; present in exponential and stationary phase yeast cultures	-1.90847	2.58378e-83	-1.5068	1.41445e-52	TRUE	FALSE	dal81-specific Activation Gene
C5_02600W_A	PUT1	Putative proline oxidase; alkaline upregulated by Rim101; flow model biofilm induced; Spider biofilm induced	-1.7559	3.01359e-25	-1.42326	4.69952e-17	TRUE	TRUE	Synergistic Activation Gene
CR_02360W_A	IDP2	Isocitrate dehydrogenase; white-opaque switch regulated; morphology-regulation by Ssn6; protein in exponential and stationary phase yeast; Hap43-repressed; Spider biofilm repressed by Bcr1, Tec1, Ndt80, Rob1, Brg1; Spider biofilm induced	-1.73905	1.18803e-16	-2.06688	5.59698e-23	FALSE	TRUE	stp2-specific Activation Gene
C3_01360C_A	IRO1	Protein with a role in iron utilization, pathogenesis; both IRO1 and adjacent URA3 are mutated in strain CAI4; suppresses S. cerevisiae aft1 mutant low-iron growth defect; hyphal-induced; reports differ about iron regulation	-2.77513	6.93292e-178	-2.6661	2.06731e-164	TRUE	TRUE	Synergistic Activation Gene
C4_03270W_A	RPF1	Putative nucleolar protein with a predicted role in the assembly and export of the large ribosomal subunit; essential for growth; rat catheter and Spider biofilm induced	2.21401	3.33243e-66	2.23582	1.78662e-67	TRUE	FALSE	dal81-specific Repression Gene
C1_02840W_A	PDE2	High affinity cyclic nucleotide phosphodiesterase; moderates signaling by cAMP; required for virulence, switching, cell wall, hyphal, not pseudohyphal growth; expressed shortly after hyphal induction; rat catheter and Spider biofilm induced	2.09625	1.49101e-19	1.77834	1.90364e-14	TRUE	FALSE	dal81-specific Repression Gene
C7_01680C_A	CAWG_05519	Protein of unknown function; rat catheter, flow model and Spider biofilm induced	2.51784	9.29342e-37	1.69723	2.07412e-17	TRUE	FALSE	dal81-specific Repression Gene
C7_04240C_A	CAWG_05753	Putative GTPase inhibitor; predicted role in endocytosis, protein targeting to vacuole; rat catheter biofilm repressed	-1.08409	4.51465e-13	-1.29873	3.60447e-18	TRUE	TRUE	Synergistic Activation Gene
C5_03500W_A	GAP6	Broad-specificity amino acid permease; Plc1, Gcn4 regulated; rat catheter biofilm induced	1.40643	0.00194636	-1.22307	0.00738978	TRUE	TRUE	Antagonistically Regulated Gene
C3_02480C_A	CCP1	Cytochrome-c peroxidase N terminus; Rim101, alkaline pH repressed; induced in low iron or by macrophage interaction; oxygen-induced activity; regulated by Sef1, Sfu1, and Hap43; Spider biofilm induced; rat catheter biofilm repressed	-1.25151	7.13533e-11	-1.63285	1.36035e-17	FALSE	TRUE	stp2-specific Activation Gene
C5_00800C_A	CAWG_04473	Indoleamine 2,3-dioxygenase (IDO); rate-limiting enzyme of tryptophan catabolism via kynurenine; enzyme inhibition by 1-methyl-D,L-tryptophan increases hyphal growth; expressed in yeast and hyphae; rat catheter and Spider biofilm induced	1.04496	4.3491e-07	0.67411	0.00126377	TRUE	FALSE	dal81-specific Repression Gene
CR_04820W_A	CAWG_01815	Protein of unknown function; Hap43-induced; rat catheter and Spider biofilm induced	1.42479	2.92891e-12	0.913688	9.16846e-06	TRUE	FALSE	dal81-specific Repression Gene
C4_05580C_A	CAWG_03264	Secreted protein; exogenously expressed protein is a substrate for Kex2 processing in vitro; fluconazole-regulated; Spider biofilm induced	2.35214	8.09791e-37	1.70152	7.10529e-20	FALSE	TRUE	stp2-specific Repression Gene
C1_11530C_A	CAWG_00284	Ortholog(s) have sulfonate dioxygenase activity and role in sulfur compound catabolic process	-2.24494	1.25317e-20	-2.07974	4.64361e-18	FALSE	TRUE	stp2-specific Activation Gene
C4_04030W_A	JEN2	Dicarboxylic acid transporter; regulated by glucose repression; induced by Rgt1; disruptants not obtained by UAU1 method; rat catheter and Spider biofilm induced	-0.675339	3.89992e-09	-2.02685	1.23062e-71	FALSE	TRUE	stp2-specific Activation Gene
CR_05610C_A	SRR1	Two-component system response regulator; involved in stress response; Plc1-regulated; upregulated in cyr1 null mutant; flow model biofilm induced; Spider biofilm induced	1.14593	9.10519e-06	2.07802	3.67464e-16	TRUE	FALSE	dal81-specific Repression Gene
CR_00270C_A	CAWG_01388	Ortholog of C. dubliniensis CD36 : Cd36_25310, Pichia stipitis Pignal : PICST_30877, Candida tropicalis MYA-3404 : CTRG_01053 and Candida lusitaniae ATCC 42720 : CLUG_02644	1.42597	4.20374e-25	1.46918	1.4048e-26	FALSE	TRUE	stp2-specific Repression Gene
C3_07440W_A	TPI1	Triose-phosphate isomerase; antigenic in mouse/human; mutation affects filamentation; macrophage-repressed; protein in exponential and stationary growth phase yeast; possibly essential; flow model biofilm induced; Spider biofilm repressed	-1.95297	8.13994e-41	-1.41874	3.51401e-22	TRUE	TRUE	Synergistic Activation Gene
C7_03280C_A	CAWG_05661	Protein of unknown function; induced by ketoconazole; Spider, F-12/CO2 and flow model biofilm induced	-1.37173	7.485e-10	-1.49612	1.78196e-11	TRUE	FALSE	dal81-specific Activation Gene
C4_01750C_A	FBA1	Fructose-bisphosphate aldolase; glycolytic enzyme; antigenic in murine/human infection; regulated by yeast-hypha switch; induced by Efg1, Gcn4, Hog1, fluconazole; phagocytosis-repressed; flow model biofilm induced; Spider biofilm repressed	-1.70665	8.06761e-15	-1.25498	1.31496e-08	TRUE	TRUE	Synergistic Activation Gene
C1_04500W_A	ICL1	Isocitrate lyase; glyoxylate cycle enzyme; required for virulence in mice; induced upon phagocytosis by macrophage; farnesol regulated; Pex5-dependent peroxisomal localization; stationary phase enriched; rat catheter, Spider biofilm induced	-2.07841	9.27313e-58	-1.54338	1.73269e-32	TRUE	TRUE	Synergistic Activation Gene
CR_08020C_A	NOP10	Small nucleolar ribonucleoprotein; flucytosine induced	1.64496	1.74467e-13	1.99013	3.93735e-19	TRUE	FALSE	dal81-specific Repression Gene
CR_01400W_A	LYS12	Homoisocitrate dehydrogenase; catalyzes 4th step in the alpha-aminoadipate pathway of lysine biosynthesis; clade-associated gene expression; protein level decreases in stationary phase cultures; Spider biofilm repressed	1.9865	1.76553e-52	1.55187	1.5091e-32	TRUE	TRUE	Coordinated Repression Gene
C5_00260W_A	CAWG_04421	Ortholog(s) have ribose phosphate diphosphokinase activity and role in 5-phosphoribose 1-diphosphate biosynthetic process, cytokinesis, fungal-type cell wall organization	2.00305	2.44146e-43	2.04649	3.53959e-45	TRUE	TRUE	Coordinated Repression Gene
C1_11320C_A	CAWG_00304	Protein of unknown function; hypoxia, Hap43-repressed; ketoconazole induced; induced in oralpharyngeal candidasis; 16h flow model biofilm repressed, late-stage flow model biofilm induced; rat catheter and Spider biofilm induced	-2.57456	6.06148e-43	-2.79478	2.5247e-50	TRUE	FALSE	dal81-specific Activation Gene
