# Supplementary material for: Coordinated regulation of pH alkalinization by two transcription factors promotes fungal commensalism and pathogenicity
Source: Nat Commun. 2025 Aug 22;16:7855. doi: 10.1038/s41467-025-62953-x (PMC12373999; doi:10.1038/s41467-025-62953-x)
Supplement: Supplementary file 7 — Supplementary Data 5 [file 41467_2025_62953_MOESM7_ESM.xlsx]

## Sheet: Data S4
ID	Description	GeneRatio	BgRatio	pvalue	p.adjust	qvalue	Count	geneID	Symbol
GO:0006082	organic acid metabolic process	27/88	421/5910	2.71e-11	6.59e-09	5.5e-09	27	C1_00170W_A/C1_01690C_A/C1_04500W_A/C1_08330C_A/C1_08400C_A/C1_09690W_A/C1_13860C_A/C2_07900W_A/C3_00810C_A/C3_05590C_A/C3_06870W_A/C3_07440W_A/C4_00200C_A/C4_00890W_A/C4_01750C_A/C4_02020W_A/C5_02600W_A/C5_04490C_A/C5_05410C_A/C6_00870C_A/CR_00150C_A/CR_01400W_A/CR_01620C_A/CR_01930C_A/CR_06860C_A/CR_07420W_A/CR_07730W_A	LEU4/LSC1/ICL1/ADH2/GCV2/MLS1/GND1/GDH2/FOX2/BAT22/TDH3/TPI1/MET15/ARO1/FBA1/CAT2/PUT1/CAR1/ILV3/ILV5/POT1/LYS12/MET6/BIO2/ARO10/KGD2/HGT14
GO:0019752	carboxylic acid metabolic process	27/88	408/5910	1.3e-11	6.59e-09	5.5e-09	27	C1_00170W_A/C1_01690C_A/C1_04500W_A/C1_08330C_A/C1_08400C_A/C1_09690W_A/C1_13860C_A/C2_07900W_A/C3_00810C_A/C3_05590C_A/C3_06870W_A/C3_07440W_A/C4_00200C_A/C4_00890W_A/C4_01750C_A/C4_02020W_A/C5_02600W_A/C5_04490C_A/C5_05410C_A/C6_00870C_A/CR_00150C_A/CR_01400W_A/CR_01620C_A/CR_01930C_A/CR_06860C_A/CR_07420W_A/CR_07730W_A	LEU4/LSC1/ICL1/ADH2/GCV2/MLS1/GND1/GDH2/FOX2/BAT22/TDH3/TPI1/MET15/ARO1/FBA1/CAT2/PUT1/CAR1/ILV3/ILV5/POT1/LYS12/MET6/BIO2/ARO10/KGD2/HGT14
GO:0043436	oxoacid metabolic process	27/88	420/5910	2.56e-11	6.59e-09	5.5e-09	27	C1_00170W_A/C1_01690C_A/C1_04500W_A/C1_08330C_A/C1_08400C_A/C1_09690W_A/C1_13860C_A/C2_07900W_A/C3_00810C_A/C3_05590C_A/C3_06870W_A/C3_07440W_A/C4_00200C_A/C4_00890W_A/C4_01750C_A/C4_02020W_A/C5_02600W_A/C5_04490C_A/C5_05410C_A/C6_00870C_A/CR_00150C_A/CR_01400W_A/CR_01620C_A/CR_01930C_A/CR_06860C_A/CR_07420W_A/CR_07730W_A	LEU4/LSC1/ICL1/ADH2/GCV2/MLS1/GND1/GDH2/FOX2/BAT22/TDH3/TPI1/MET15/ARO1/FBA1/CAT2/PUT1/CAR1/ILV3/ILV5/POT1/LYS12/MET6/BIO2/ARO10/KGD2/HGT14
GO:0044283	small molecule biosynthetic process	19/88	335/5910	3.05e-07	2.69e-05	2.24e-05	19	C1_00170W_A/C1_08330C_A/C1_13860C_A/C3_05590C_A/C3_06870W_A/C3_07440W_A/C4_00200C_A/C4_00890W_A/C4_01750C_A/C5_02600W_A/C5_04570C_A/C5_05410C_A/C6_00870C_A/CR_00150C_A/CR_00200W_A/CR_01400W_A/CR_01620C_A/CR_01930C_A/CR_06860C_A	LEU4/ADH2/GND1/BAT22/TDH3/TPI1/MET15/ARO1/FBA1/PUT1/URA7/ILV3/ILV5/POT1/PCK1/LYS12/MET6/BIO2/ARO10
GO:0016053	organic acid biosynthetic process	15/88	209/5910	3.31e-07	2.69e-05	2.24e-05	15	C1_00170W_A/C1_13860C_A/C3_05590C_A/C3_06870W_A/C3_07440W_A/C4_00200C_A/C4_00890W_A/C4_01750C_A/C5_02600W_A/C5_05410C_A/C6_00870C_A/CR_00150C_A/CR_01400W_A/CR_01620C_A/CR_01930C_A	LEU4/GND1/BAT22/TDH3/TPI1/MET15/ARO1/FBA1/PUT1/ILV3/ILV5/POT1/LYS12/MET6/BIO2
GO:0044282	small molecule catabolic process	15/88	146/5910	2.56e-09	4.68e-07	3.9e-07	15	C1_04500W_A/C1_08330C_A/C1_08400C_A/C1_09690W_A/C1_13860C_A/C2_07900W_A/C3_00810C_A/C3_07440W_A/C4_02020W_A/C5_02600W_A/C5_03900W_A/C5_04490C_A/CR_00150C_A/CR_06860C_A/CR_07730W_A	ICL1/ADH2/GCV2/MLS1/GND1/GDH2/FOX2/TPI1/CAT2/PUT1/PGA56/CAR1/POT1/ARO10/HGT14
GO:0046394	carboxylic acid biosynthetic process	15/88	209/5910	3.31e-07	2.69e-05	2.24e-05	15	C1_00170W_A/C1_13860C_A/C3_05590C_A/C3_06870W_A/C3_07440W_A/C4_00200C_A/C4_00890W_A/C4_01750C_A/C5_02600W_A/C5_05410C_A/C6_00870C_A/CR_00150C_A/CR_01400W_A/CR_01620C_A/CR_01930C_A	LEU4/GND1/BAT22/TDH3/TPI1/MET15/ARO1/FBA1/PUT1/ILV3/ILV5/POT1/LYS12/MET6/BIO2
GO:0006520	amino acid metabolic process	14/88	213/5910	2.47e-06	0.000131	0.000109	14	C1_00170W_A/C1_08330C_A/C1_08400C_A/C2_07900W_A/C3_05590C_A/C4_00200C_A/C4_00890W_A/C5_02600W_A/C5_04490C_A/C5_05410C_A/C6_00870C_A/CR_01400W_A/CR_01620C_A/CR_06860C_A	LEU4/ADH2/GCV2/GDH2/BAT22/MET15/ARO1/PUT1/CAR1/ILV3/ILV5/LYS12/MET6/ARO10
GO:0005975	carbohydrate metabolic process	13/88	226/5910	2.49e-05	0.000904	0.000754	13	C1_02520W_A/C1_03380W_A/C1_06850W_A/C1_08330C_A/C1_09690W_A/C1_13860C_A/C3_06870W_A/C3_07440W_A/C4_01750C_A/C5_03900W_A/C7_00930W_A/CR_00200W_A/CR_00780C_A	SCW4/TPS2/PCL7/ADH2/MLS1/GND1/TDH3/TPI1/FBA1/PGA56/GPH1/PCK1/GSY1
GO:0016054	organic acid catabolic process	13/88	108/5910	4.68e-09	5.7e-07	4.75e-07	13	C1_04500W_A/C1_08330C_A/C1_08400C_A/C1_09690W_A/C1_13860C_A/C2_07900W_A/C3_00810C_A/C4_02020W_A/C5_02600W_A/C5_04490C_A/CR_00150C_A/CR_06860C_A/CR_07730W_A	ICL1/ADH2/GCV2/MLS1/GND1/GDH2/FOX2/CAT2/PUT1/CAR1/POT1/ARO10/HGT14
GO:0032787	monocarboxylic acid metabolic process	13/88	177/5910	1.7e-06	0.000109	9.12e-05	13	C1_04500W_A/C1_08330C_A/C1_09690W_A/C1_13860C_A/C3_00810C_A/C3_06870W_A/C3_07440W_A/C4_01750C_A/C4_02020W_A/CR_00150C_A/CR_01930C_A/CR_06860C_A/CR_07730W_A	ICL1/ADH2/MLS1/GND1/FOX2/TDH3/TPI1/FBA1/CAT2/POT1/BIO2/ARO10/HGT14
GO:0046395	carboxylic acid catabolic process	13/88	108/5910	4.68e-09	5.7e-07	4.75e-07	13	C1_04500W_A/C1_08330C_A/C1_08400C_A/C1_09690W_A/C1_13860C_A/C2_07900W_A/C3_00810C_A/C4_02020W_A/C5_02600W_A/C5_04490C_A/CR_00150C_A/CR_06860C_A/CR_07730W_A	ICL1/ADH2/GCV2/MLS1/GND1/GDH2/FOX2/CAT2/PUT1/CAR1/POT1/ARO10/HGT14
GO:1901605	alpha-amino acid metabolic process	12/88	150/5910	1.8e-06	0.000109	9.12e-05	12	C1_00170W_A/C1_08330C_A/C1_08400C_A/C2_07900W_A/C3_05590C_A/C4_00200C_A/C5_02600W_A/C5_04490C_A/C6_00870C_A/CR_01400W_A/CR_01620C_A/CR_06860C_A	LEU4/ADH2/GCV2/GDH2/BAT22/MET15/PUT1/CAR1/ILV5/LYS12/MET6/ARO10
GO:0055086	nucleobase-containing small molecule metabolic process	11/88	251/5910	0.0011443	0.0132775	0.0110701	11	C1_01690C_A/C1_08320W_A/C1_08330C_A/C1_13860C_A/C3_06870W_A/C3_07440W_A/C4_01750C_A/C5_00260W_A/C5_04570C_A/C5_05050W_A/CR_01620C_A	LSC1/TKL1/ADH2/GND1/TDH3/TPI1/FBA1/CAWG_04421/URA7/ADH1/MET6
GO:0006091	generation of precursor metabolites and energy	10/88	165/5910	0.000151	0.00269519	0.00224712	10	C1_01690C_A/C1_06850W_A/C1_08330C_A/C1_13860C_A/C3_06870W_A/C3_07440W_A/C4_01750C_A/C7_00930W_A/CR_00780C_A/CR_07420W_A	LSC1/PCL7/ADH2/GND1/TDH3/TPI1/FBA1/GPH1/GSY1/KGD2
GO:0006753	nucleoside phosphate metabolic process	10/88	218/5910	0.0013776	0.0152579	0.0127214	10	C1_01690C_A/C1_08320W_A/C1_08330C_A/C1_13860C_A/C3_06870W_A/C3_07440W_A/C4_01750C_A/C5_00260W_A/C5_04570C_A/C5_05050W_A	LSC1/TKL1/ADH2/GND1/TDH3/TPI1/FBA1/CAWG_04421/URA7/ADH1
GO:0009117	nucleotide metabolic process	10/88	211/5910	0.00107468	0.0126709	0.0105644	10	C1_01690C_A/C1_08320W_A/C1_08330C_A/C1_13860C_A/C3_06870W_A/C3_07440W_A/C4_01750C_A/C5_00260W_A/C5_04570C_A/C5_05050W_A	LSC1/TKL1/ADH2/GND1/TDH3/TPI1/FBA1/CAWG_04421/URA7/ADH1
GO:1901361	organic cyclic compound catabolic process	10/88	214/5910	0.00119699	0.0135003	0.0112559	10	C1_00350C_A/C1_13860C_A/C3_06870W_A/C3_07440W_A/C4_01750C_A/C5_02600W_A/CR_00150C_A/CR_02530W_A/CR_06860C_A/CR_07730W_A	HMX1/GND1/TDH3/TPI1/FBA1/PUT1/POT1/DBP2/ARO10/HGT14
GO:0008652	amino acid biosynthetic process	9/88	114/5910	4.3e-05	0.001257	0.00104803	9	C1_00170W_A/C3_05590C_A/C4_00200C_A/C4_00890W_A/C5_02600W_A/C5_05410C_A/C6_00870C_A/CR_01400W_A/CR_01620C_A	LEU4/BAT22/MET15/ARO1/PUT1/ILV3/ILV5/LYS12/MET6
GO:0016999	antibiotic metabolic process	9/88	67/5910	5.02e-07	3.67e-05	3.06e-05	9	C1_01690C_A/C1_04500W_A/C1_06810W_A/C1_08330C_A/C1_09690W_A/C4_02020W_A/C5_05050W_A/CR_06860C_A/CR_07420W_A	LSC1/ICL1/CAT1/ADH2/MLS1/CAT2/ADH1/ARO10/KGD2
GO:0006820	monoatomic anion transport	8/88	185/5910	0.00600395	0.0498737	0.0415824	8	C1_02530C_A/C1_07120W_A/C3_03690W_A/C3_04910C_A/C4_01750C_A/C5_03500W_A/C6_01060C_A/CR_09920W_A	DIP5/GAP4/CAWG_02686/NCE102/FBA1/GAP6/CAN2/CAWG_02256
GO:0015711	organic anion transport	8/88	156/5910	0.00211464	0.0214695	0.0179002	8	C1_02530C_A/C1_07120W_A/C3_03690W_A/C3_04910C_A/C4_01750C_A/C5_03500W_A/C6_01060C_A/CR_09920W_A	DIP5/GAP4/CAWG_02686/NCE102/FBA1/GAP6/CAN2/CAWG_02256
GO:0072521	purine-containing compound metabolic process	8/88	163/5910	0.00278312	0.0271626	0.0226469	8	C1_01690C_A/C1_08330C_A/C1_13860C_A/C3_06870W_A/C3_07440W_A/C4_01750C_A/C5_00260W_A/CR_01620C_A	LSC1/ADH2/GND1/TDH3/TPI1/FBA1/CAWG_04421/MET6
GO:0003333	amino acid transmembrane transport	7/88	48/5910	5.72e-06	0.000279	0.000233	7	C1_02530C_A/C1_07120W_A/C3_03690W_A/C4_01750C_A/C5_03500W_A/C6_01060C_A/CR_09920W_A	DIP5/GAP4/CAWG_02686/FBA1/GAP6/CAN2/CAWG_02256
GO:0005996	monosaccharide metabolic process	7/88	67/5910	5.38e-05	0.00131038	0.00109254	7	C1_06850W_A/C1_08330C_A/C3_06870W_A/C3_07440W_A/C4_01750C_A/C5_03900W_A/CR_00200W_A	PCL7/ADH2/TDH3/TPI1/FBA1/PGA56/PCK1
GO:0006163	purine nucleotide metabolic process	7/88	142/5910	0.00499931	0.0448067	0.0373578	7	C1_01690C_A/C1_08330C_A/C1_13860C_A/C3_06870W_A/C3_07440W_A/C4_01750C_A/C5_00260W_A	LSC1/ADH2/GND1/TDH3/TPI1/FBA1/CAWG_04421
GO:0006865	amino acid transport	7/88	55/5910	1.45e-05	0.000589	0.000491	7	C1_02530C_A/C1_07120W_A/C3_03690W_A/C4_01750C_A/C5_03500W_A/C6_01060C_A/CR_09920W_A	DIP5/GAP4/CAWG_02686/FBA1/GAP6/CAN2/CAWG_02256
GO:0009141	nucleoside triphosphate metabolic process	7/88	98/5910	0.000589	0.00797803	0.00665171	7	C1_01690C_A/C1_08330C_A/C1_13860C_A/C3_06870W_A/C3_07440W_A/C4_01750C_A/C5_04570C_A	LSC1/ADH2/GND1/TDH3/TPI1/FBA1/URA7
GO:0015849	organic acid transport	7/88	91/5910	0.000375	0.00559504	0.00466488	7	C1_02530C_A/C1_07120W_A/C3_03690W_A/C4_01750C_A/C5_03500W_A/C6_01060C_A/CR_09920W_A	DIP5/GAP4/CAWG_02686/FBA1/GAP6/CAN2/CAWG_02256
GO:0016052	carbohydrate catabolic process	7/88	67/5910	5.38e-05	0.00131038	0.00109254	7	C1_06850W_A/C1_13860C_A/C3_06870W_A/C3_07440W_A/C4_01750C_A/C5_03900W_A/C7_00930W_A	PCL7/GND1/TDH3/TPI1/FBA1/PGA56/GPH1
GO:0019318	hexose metabolic process	7/88	60/5910	2.6e-05	0.000904	0.000754	7	C1_06850W_A/C1_08330C_A/C3_06870W_A/C3_07440W_A/C4_01750C_A/C5_03900W_A/CR_00200W_A	PCL7/ADH2/TDH3/TPI1/FBA1/PGA56/PCK1
GO:0019362	pyridine nucleotide metabolic process	7/88	67/5910	5.38e-05	0.00131038	0.00109254	7	C1_08320W_A/C1_08330C_A/C1_13860C_A/C3_06870W_A/C3_07440W_A/C4_01750C_A/C5_05050W_A	TKL1/ADH2/GND1/TDH3/TPI1/FBA1/ADH1
GO:0046496	nicotinamide nucleotide metabolic process	7/88	66/5910	4.87e-05	0.00131038	0.00109254	7	C1_08320W_A/C1_08330C_A/C1_13860C_A/C3_06870W_A/C3_07440W_A/C4_01750C_A/C5_05050W_A	TKL1/ADH2/GND1/TDH3/TPI1/FBA1/ADH1
GO:0046942	carboxylic acid transport	7/88	91/5910	0.000375	0.00559504	0.00466488	7	C1_02530C_A/C1_07120W_A/C3_03690W_A/C4_01750C_A/C5_03500W_A/C6_01060C_A/CR_09920W_A	DIP5/GAP4/CAWG_02686/FBA1/GAP6/CAN2/CAWG_02256
GO:0072329	monocarboxylic acid catabolic process	7/88	63/5910	3.59e-05	0.0011929	0.000995	7	C1_04500W_A/C1_09690W_A/C1_13860C_A/C3_00810C_A/C4_02020W_A/CR_00150C_A/CR_07730W_A	ICL1/MLS1/GND1/FOX2/CAT2/POT1/HGT14
GO:0072524	pyridine-containing compound metabolic process	7/88	74/5910	0.000102	0.0019678	0.00164066	7	C1_08320W_A/C1_08330C_A/C1_13860C_A/C3_06870W_A/C3_07440W_A/C4_01750C_A/C5_05050W_A	TKL1/ADH2/GND1/TDH3/TPI1/FBA1/ADH1
GO:0098656	monoatomic anion transmembrane transport	7/88	96/5910	0.00052	0.00745476	0.00621543	7	C1_02530C_A/C1_07120W_A/C3_03690W_A/C4_01750C_A/C5_03500W_A/C6_01060C_A/CR_09920W_A	DIP5/GAP4/CAWG_02686/FBA1/GAP6/CAN2/CAWG_02256
GO:1901293	nucleoside phosphate biosynthetic process	7/88	118/5910	0.00176701	0.0184526	0.015385	7	C1_01690C_A/C1_13860C_A/C3_06870W_A/C3_07440W_A/C4_01750C_A/C5_00260W_A/C5_04570C_A	LSC1/GND1/TDH3/TPI1/FBA1/CAWG_04421/URA7
GO:1901607	alpha-amino acid biosynthetic process	7/88	104/5910	0.000842	0.0104334	0.00869891	7	C1_00170W_A/C3_05590C_A/C4_00200C_A/C5_02600W_A/C6_00870C_A/CR_01400W_A/CR_01620C_A	LEU4/BAT22/MET15/PUT1/ILV5/LYS12/MET6
GO:1903825	organic acid transmembrane transport	7/88	73/5910	9.37e-05	0.0019034	0.00158696	7	C1_02530C_A/C1_07120W_A/C3_03690W_A/C4_01750C_A/C5_03500W_A/C6_01060C_A/CR_09920W_A	DIP5/GAP4/CAWG_02686/FBA1/GAP6/CAN2/CAWG_02256
GO:1905039	carboxylic acid transmembrane transport	7/88	73/5910	9.37e-05	0.0019034	0.00158696	7	C1_02530C_A/C1_07120W_A/C3_03690W_A/C4_01750C_A/C5_03500W_A/C6_01060C_A/CR_09920W_A	DIP5/GAP4/CAWG_02686/FBA1/GAP6/CAN2/CAWG_02256
GO:0006006	glucose metabolic process	6/88	49/5910	7.68e-05	0.00170124	0.00141842	6	C1_06850W_A/C1_08330C_A/C3_06870W_A/C3_07440W_A/C4_01750C_A/CR_00200W_A	PCL7/ADH2/TDH3/TPI1/FBA1/PCK1
GO:0006090	pyruvate metabolic process	6/88	35/5910	1.05e-05	0.000481	0.000401	6	C1_08330C_A/C1_13860C_A/C3_06870W_A/C3_07440W_A/C4_01750C_A/CR_06860C_A	ADH2/GND1/TDH3/TPI1/FBA1/ARO10
GO:0009063	amino acid catabolic process	6/88	51/5910	9.66e-05	0.00190812	0.0015909	6	C1_08330C_A/C1_08400C_A/C2_07900W_A/C5_02600W_A/C5_04490C_A/CR_06860C_A	ADH2/GCV2/GDH2/PUT1/CAR1/ARO10
GO:0009142	nucleoside triphosphate biosynthetic process	6/88	53/5910	0.00012	0.00225331	0.0018787	6	C1_01690C_A/C1_13860C_A/C3_06870W_A/C3_07440W_A/C4_01750C_A/C5_04570C_A	LSC1/GND1/TDH3/TPI1/FBA1/URA7
GO:0044419	biological process involved in interspecies interaction between organisms	6/88	60/5910	0.000241	0.00419808	0.00350016	6	C1_03380W_A/C1_06810W_A/C3_01360C_A/C3_06870W_A/C4_01750C_A/C5_05050W_A	TPS2/CAT1/IRO1/TDH3/FBA1/ADH1
GO:0072522	purine-containing compound biosynthetic process	6/88	88/5910	0.00187259	0.0192798	0.0160746	6	C1_13860C_A/C3_06870W_A/C3_07440W_A/C4_01750C_A/C5_00260W_A/CR_01620C_A	GND1/TDH3/TPI1/FBA1/CAWG_04421/MET6
GO:1901606	alpha-amino acid catabolic process	6/88	40/5910	2.35e-05	0.000903	0.000753	6	C1_08330C_A/C1_08400C_A/C2_07900W_A/C5_02600W_A/C5_04490C_A/CR_06860C_A	ADH2/GCV2/GDH2/PUT1/CAR1/ARO10
GO:0006164	purine nucleotide biosynthetic process	5/88	78/5910	0.00587391	0.0493543	0.0411493	5	C1_13860C_A/C3_06870W_A/C3_07440W_A/C4_01750C_A/C5_00260W_A	GND1/TDH3/TPI1/FBA1/CAWG_04421
GO:0009081	branched-chain amino acid metabolic process	5/88	22/5910	1.41e-05	0.000589	0.000491	5	C1_00170W_A/C3_05590C_A/C5_05410C_A/C6_00870C_A/CR_06860C_A	LEU4/BAT22/ILV3/ILV5/ARO10
GO:0009132	nucleoside diphosphate metabolic process	5/88	34/5910	0.000129	0.00236227	0.00196955	5	C1_08330C_A/C1_13860C_A/C3_06870W_A/C3_07440W_A/C4_01750C_A	ADH2/GND1/TDH3/TPI1/FBA1
GO:0009135	purine nucleoside diphosphate metabolic process	5/88	29/5910	5.85e-05	0.00133627	0.00111412	5	C1_08330C_A/C1_13860C_A/C3_06870W_A/C3_07440W_A/C4_01750C_A	ADH2/GND1/TDH3/TPI1/FBA1
GO:0015976	carbon utilization	5/88	16/5910	2.51e-06	0.000131	0.000109	5	C1_04500W_A/C1_09690W_A/C2_10540W_A/C4_02020W_A/CR_00200W_A	ICL1/MLS1/CAWG_06116/CAT2/PCK1
GO:0034404	nucleobase-containing small molecule biosynthetic process	5/88	46/5910	0.000553	0.00763264	0.00636374	5	C1_13860C_A/C3_06870W_A/C3_07440W_A/C4_01750C_A/C5_04570C_A	GND1/TDH3/TPI1/FBA1/URA7
GO:0043648	dicarboxylic acid metabolic process	5/88	40/5910	0.000285	0.00484405	0.00403875	5	C1_01690C_A/C2_07900W_A/C4_00890W_A/C5_02600W_A/CR_07420W_A	LSC1/GDH2/ARO1/PUT1/KGD2
GO:0046031	ADP metabolic process	5/88	28/5910	4.9e-05	0.00131038	0.00109254	5	C1_08330C_A/C1_13860C_A/C3_06870W_A/C3_07440W_A/C4_01750C_A	ADH2/GND1/TDH3/TPI1/FBA1
GO:0006096	glycolytic process	4/88	23/5910	0.000327	0.00531831	0.00443416	4	C1_13860C_A/C3_06870W_A/C3_07440W_A/C4_01750C_A	GND1/TDH3/TPI1/FBA1
GO:0006754	ATP biosynthetic process	4/88	46/5910	0.00465053	0.0430321	0.0358782	4	C1_13860C_A/C3_06870W_A/C3_07440W_A/C4_01750C_A	GND1/TDH3/TPI1/FBA1
GO:0009062	fatty acid catabolic process	4/88	31/5910	0.00106235	0.0126709	0.0105644	4	C1_04500W_A/C1_09690W_A/C3_00810C_A/CR_00150C_A	ICL1/MLS1/FOX2/POT1
GO:0009082	branched-chain amino acid biosynthetic process	4/88	14/5910	4.1e-05	0.00124891	0.00104128	4	C1_00170W_A/C3_05590C_A/C5_05410C_A/C6_00870C_A	LEU4/BAT22/ILV3/ILV5
GO:0009145	purine nucleoside triphosphate biosynthetic process	4/88	47/5910	0.0050262	0.0448067	0.0373578	4	C1_13860C_A/C3_06870W_A/C3_07440W_A/C4_01750C_A	GND1/TDH3/TPI1/FBA1
GO:0009166	nucleotide catabolic process	4/88	32/5910	0.00120044	0.0135003	0.0112559	4	C1_13860C_A/C3_06870W_A/C3_07440W_A/C4_01750C_A	GND1/TDH3/TPI1/FBA1
GO:0017001	antibiotic catabolic process	4/88	24/5910	0.000388	0.00567886	0.00473477	4	C1_04500W_A/C1_08330C_A/C1_09690W_A/C4_02020W_A	ICL1/ADH2/MLS1/CAT2
GO:0019359	nicotinamide nucleotide biosynthetic process	4/88	40/5910	0.00278686	0.0271626	0.0226469	4	C1_13860C_A/C3_06870W_A/C3_07440W_A/C4_01750C_A	GND1/TDH3/TPI1/FBA1
GO:0019363	pyridine nucleotide biosynthetic process	4/88	41/5910	0.00305347	0.0293696	0.024487	4	C1_13860C_A/C3_06870W_A/C3_07440W_A/C4_01750C_A	GND1/TDH3/TPI1/FBA1
GO:0042866	pyruvate biosynthetic process	4/88	23/5910	0.000327	0.00531831	0.00443416	4	C1_13860C_A/C3_06870W_A/C3_07440W_A/C4_01750C_A	GND1/TDH3/TPI1/FBA1
GO:0044403	biological process involved in symbiotic interaction	4/88	34/5910	0.00151348	0.0160341	0.0133685	4	C1_06810W_A/C3_06870W_A/C4_01750C_A/C5_05050W_A	CAT1/TDH3/FBA1/ADH1
GO:0051701	biological process involved in interaction with host	4/88	14/5910	4.1e-05	0.00124891	0.00104128	4	C1_06810W_A/C3_06870W_A/C4_01750C_A/C5_05050W_A	CAT1/TDH3/FBA1/ADH1
GO:0072525	pyridine-containing compound biosynthetic process	4/88	49/5910	0.00583759	0.0493543	0.0411493	4	C1_13860C_A/C3_06870W_A/C3_07440W_A/C4_01750C_A	GND1/TDH3/TPI1/FBA1
GO:1901292	nucleoside phosphate catabolic process	4/88	34/5910	0.00151348	0.0160341	0.0133685	4	C1_13860C_A/C3_06870W_A/C3_07440W_A/C4_01750C_A	GND1/TDH3/TPI1/FBA1
GO:0005977	glycogen metabolic process	3/88	23/5910	0.00455483	0.0426869	0.0355904	3	C1_06850W_A/C7_00930W_A/CR_00780C_A	PCL7/GPH1/GSY1
GO:0006067	ethanol metabolic process	3/88	10/5910	0.000355	0.00552117	0.00460329	3	C1_08330C_A/C5_05050W_A/CR_06860C_A	ADH2/ADH1/ARO10
GO:0006081	cellular aldehyde metabolic process	3/88	23/5910	0.00455483	0.0426869	0.0355904	3	C1_08320W_A/C1_09690W_A/C1_13860C_A	TKL1/MLS1/GND1
GO:0006083	acetate metabolic process	3/88	13/5910	0.000819	0.0103232	0.00860704	3	C1_04500W_A/C1_09690W_A/C4_02020W_A	ICL1/MLS1/CAT2
GO:0006112	energy reserve metabolic process	3/88	24/5910	0.00515003	0.0453575	0.037817	3	C1_06850W_A/C7_00930W_A/CR_00780C_A	PCL7/GPH1/GSY1
GO:0006551	leucine metabolic process	3/88	10/5910	0.000355	0.00552117	0.00460329	3	C1_00170W_A/C3_05590C_A/CR_06860C_A	LEU4/BAT22/ARO10
GO:0006734	NADH metabolic process	3/88	14/5910	0.00103128	0.0125645	0.0104757	3	C1_08330C_A/C3_07440W_A/C5_05050W_A	ADH2/TPI1/ADH1
GO:0009065	glutamine family amino acid catabolic process	3/88	12/5910	0.000637	0.00831381	0.00693166	3	C2_07900W_A/C5_02600W_A/C5_04490C_A	GDH2/PUT1/CAR1
GO:0034308	primary alcohol metabolic process	3/88	12/5910	0.000637	0.00831381	0.00693166	3	C1_08330C_A/C5_05050W_A/CR_06860C_A	ADH2/ADH1/ARO10
