# Supplementary material for: Coordinated regulation of pH alkalinization by two transcription factors promotes fungal commensalism and pathogenicity
Source: Nat Commun. 2025 Aug 22;16:7855. doi: 10.1038/s41467-025-62953-x (PMC12373999; doi:10.1038/s41467-025-62953-x)
Supplement: Supplementary file 8 — Supplementary Data 6 [file 41467_2025_62953_MOESM8_ESM.xlsx]

## Sheet: sheet
ID	Description	GeneRatio	BgRatio	pvalue	p.adjust	qvalue	Count	geneID	Symbol	source
GO:0005975	carbohydrate metabolic process	16/147	226/5910	0.000137858	0.0339137	0.0305054	16	C1_04320W_A/C1_08500C_A/C2_03270W_A/C2_03940C_A/C2_07210C_A/C2_08130W_A/C2_10690W_A/C3_06450W_A/C3_07830W_A/C4_04530C_A/C4_06570C_A/C5_04110W_A/C5_04120C_A/C6_00750C_A/C6_02010C_A/CR_02820W_A	GPM2/ENO1/GPM1/SCH9/TPK2/ARA1/TPS3/GLG2/FBP1/PHR1/PDC11/SCW11/CAWG_04785/PGK1/GPD2/PGM2/GPM2/ENO1/GPM1/SCH9/TPK2/ARA1/TPS3/GLG2/FBP1/PHR1/PDC11/SCW11/CAWG_04785/PGK1/GPD2/PGM2/GPM2/ENO1/GPM1/SCH9/TPK2/ARA1/TPS3/GLG2/FBP1/PHR1/PDC11/SCW11/CAWG_04785/PGK1/GPD2/PGM2/GPM2/ENO1/GPM1/SCH9/TPK2/ARA1/TPS3/GLG2/FBP1/PHR1/PDC11/SCW11/CAWG_04785/PGK1/GPD2/PGM2/GPM2/ENO1/GPM1/SCH9/TPK2/ARA1/TPS3/GLG2/FBP1/PH…	target_genes_regulated_specifically_by_Dal81
GO:0016052	carbohydrate catabolic process	8/147	67/5910	0.000228143	0.0341715	0.0307373	8	C1_04320W_A/C1_08500C_A/C2_03270W_A/C2_03940C_A/C2_07210C_A/C5_04120C_A/C6_00750C_A/CR_02820W_A	GPM2/ENO1/GPM1/SCH9/TPK2/CAWG_04785/PGK1/PGM2/GPM2/ENO1/GPM1/SCH9/TPK2/CAWG_04785/PGK1/PGM2/GPM2/ENO1/GPM1/SCH9/TPK2/CAWG_04785/PGK1/PGM2/GPM2/ENO1/GPM1/SCH9/TPK2/CAWG_04785/PGK1/PGM2/GPM2/ENO1/GPM1/SCH9/TPK2/CAWG_04785/PGK1/PGM2/GPM2/ENO1/GPM1/SCH9/TPK2/CAWG_04785/PGK1/PGM2/GPM2/ENO1/GPM1/SCH9/TPK2/CAWG_04785/PGK1/PGM2/GPM2/ENO1/GPM1/SCH9/TPK2/CAWG_04785/PGK1/PGM2	target_genes_regulated_specifically_by_Dal81
GO:0072524	pyridine-containing compound metabolic process	8/147	74/5910	0.000455251	0.0352061	0.0316679	8	C1_04320W_A/C1_08500C_A/C2_03270W_A/C4_06570C_A/C5_00800C_A/C6_00750C_A/C6_02010C_A/CR_04590C_A	GPM2/ENO1/GPM1/PDC11/CAWG_04473/PGK1/GPD2/PDX3/GPM2/ENO1/GPM1/PDC11/CAWG_04473/PGK1/GPD2/PDX3/GPM2/ENO1/GPM1/PDC11/CAWG_04473/PGK1/GPD2/PDX3/GPM2/ENO1/GPM1/PDC11/CAWG_04473/PGK1/GPD2/PDX3/GPM2/ENO1/GPM1/PDC11/CAWG_04473/PGK1/GPD2/PDX3/GPM2/ENO1/GPM1/PDC11/CAWG_04473/PGK1/GPD2/PDX3/GPM2/ENO1/GPM1/PDC11/CAWG_04473/PGK1/GPD2/PDX3/GPM2/ENO1/GPM1/PDC11/CAWG_04473/PGK1/GPD2/PDX3	target_genes_regulated_specifically_by_Dal81
GO:0006006	glucose metabolic process	7/147	49/5910	0.000182725	0.0339137	0.0305054	7	C1_08500C_A/C2_03270W_A/C2_07210C_A/C3_07830W_A/C4_06570C_A/C6_00750C_A/CR_02820W_A	ENO1/GPM1/TPK2/FBP1/PDC11/PGK1/PGM2/ENO1/GPM1/TPK2/FBP1/PDC11/PGK1/PGM2/ENO1/GPM1/TPK2/FBP1/PDC11/PGK1/PGM2/ENO1/GPM1/TPK2/FBP1/PDC11/PGK1/PGM2/ENO1/GPM1/TPK2/FBP1/PDC11/PGK1/PGM2/ENO1/GPM1/TPK2/FBP1/PDC11/PGK1/PGM2/ENO1/GPM1/TPK2/FBP1/PDC11/PGK1/PGM2	target_genes_regulated_specifically_by_Dal81
GO:0019318	hexose metabolic process	7/147	60/5910	0.000653879	0.037925	0.0341135	7	C1_08500C_A/C2_03270W_A/C2_07210C_A/C3_07830W_A/C4_06570C_A/C6_00750C_A/CR_02820W_A	ENO1/GPM1/TPK2/FBP1/PDC11/PGK1/PGM2/ENO1/GPM1/TPK2/FBP1/PDC11/PGK1/PGM2/ENO1/GPM1/TPK2/FBP1/PDC11/PGK1/PGM2/ENO1/GPM1/TPK2/FBP1/PDC11/PGK1/PGM2/ENO1/GPM1/TPK2/FBP1/PDC11/PGK1/PGM2/ENO1/GPM1/TPK2/FBP1/PDC11/PGK1/PGM2/ENO1/GPM1/TPK2/FBP1/PDC11/PGK1/PGM2	target_genes_regulated_specifically_by_Dal81
GO:0005984	disaccharide metabolic process	5/147	22/5910	0.000166397	0.0339137	0.0305054	5	C2_03940C_A/C2_07210C_A/C2_10690W_A/C3_07830W_A/CR_02820W_A	SCH9/TPK2/TPS3/FBP1/PGM2/SCH9/TPK2/TPS3/FBP1/PGM2/SCH9/TPK2/TPS3/FBP1/PGM2/SCH9/TPK2/TPS3/FBP1/PGM2/SCH9/TPK2/TPS3/FBP1/PGM2	target_genes_regulated_specifically_by_Dal81
GO:0006094	gluconeogenesis	5/147	25/5910	0.000316094	0.0341715	0.0307373	5	C1_08500C_A/C2_03270W_A/C2_07210C_A/C3_07830W_A/C6_00750C_A	ENO1/GPM1/TPK2/FBP1/PGK1/ENO1/GPM1/TPK2/FBP1/PGK1/ENO1/GPM1/TPK2/FBP1/PGK1/ENO1/GPM1/TPK2/FBP1/PGK1/ENO1/GPM1/TPK2/FBP1/PGK1	target_genes_regulated_specifically_by_Dal81
GO:0009135	purine nucleoside diphosphate metabolic process	5/147	29/5910	0.00065211	0.037925	0.0341135	5	C1_04320W_A/C1_08500C_A/C2_03270W_A/C4_06570C_A/C6_00750C_A	GPM2/ENO1/GPM1/PDC11/PGK1/GPM2/ENO1/GPM1/PDC11/PGK1/GPM2/ENO1/GPM1/PDC11/PGK1/GPM2/ENO1/GPM1/PDC11/PGK1/GPM2/ENO1/GPM1/PDC11/PGK1	target_genes_regulated_specifically_by_Dal81
GO:0009311	oligosaccharide metabolic process	5/147	25/5910	0.000316094	0.0341715	0.0307373	5	C2_03940C_A/C2_07210C_A/C2_10690W_A/C3_07830W_A/CR_02820W_A	SCH9/TPK2/TPS3/FBP1/PGM2/SCH9/TPK2/TPS3/FBP1/PGM2/SCH9/TPK2/TPS3/FBP1/PGM2/SCH9/TPK2/TPS3/FBP1/PGM2/SCH9/TPK2/TPS3/FBP1/PGM2	target_genes_regulated_specifically_by_Dal81
GO:0019319	hexose biosynthetic process	5/147	26/5910	0.000383585	0.0341715	0.0307373	5	C1_08500C_A/C2_03270W_A/C2_07210C_A/C3_07830W_A/C6_00750C_A	ENO1/GPM1/TPK2/FBP1/PGK1/ENO1/GPM1/TPK2/FBP1/PGK1/ENO1/GPM1/TPK2/FBP1/PGK1/ENO1/GPM1/TPK2/FBP1/PGK1/ENO1/GPM1/TPK2/FBP1/PGK1	target_genes_regulated_specifically_by_Dal81
GO:0019933	cAMP-mediated signaling	5/147	14/5910	1.486e-05	0.00689503	0.00620209	5	C1_02840W_A/C2_03940C_A/C2_07210C_A/CR_04190W_A/CR_06000W_A	PDE2/SCH9/TPK2/SRV2/SOK1/PDE2/SCH9/TPK2/SRV2/SOK1/PDE2/SCH9/TPK2/SRV2/SOK1/PDE2/SCH9/TPK2/SRV2/SOK1/PDE2/SCH9/TPK2/SRV2/SOK1	target_genes_regulated_specifically_by_Dal81
GO:0019935	cyclic-nucleotide-mediated signaling	5/147	14/5910	1.486e-05	0.00689503	0.00620209	5	C1_02840W_A/C2_03940C_A/C2_07210C_A/CR_04190W_A/CR_06000W_A	PDE2/SCH9/TPK2/SRV2/SOK1/PDE2/SCH9/TPK2/SRV2/SOK1/PDE2/SCH9/TPK2/SRV2/SOK1/PDE2/SCH9/TPK2/SRV2/SOK1/PDE2/SCH9/TPK2/SRV2/SOK1	target_genes_regulated_specifically_by_Dal81
GO:0046031	ADP metabolic process	5/147	28/5910	0.000550591	0.037925	0.0341135	5	C1_04320W_A/C1_08500C_A/C2_03270W_A/C4_06570C_A/C6_00750C_A	GPM2/ENO1/GPM1/PDC11/PGK1/GPM2/ENO1/GPM1/PDC11/PGK1/GPM2/ENO1/GPM1/PDC11/PGK1/GPM2/ENO1/GPM1/PDC11/PGK1/GPM2/ENO1/GPM1/PDC11/PGK1	target_genes_regulated_specifically_by_Dal81
GO:0046364	monosaccharide biosynthetic process	5/147	26/5910	0.000383585	0.0341715	0.0307373	5	C1_08500C_A/C2_03270W_A/C2_07210C_A/C3_07830W_A/C6_00750C_A	ENO1/GPM1/TPK2/FBP1/PGK1/ENO1/GPM1/TPK2/FBP1/PGK1/ENO1/GPM1/TPK2/FBP1/PGK1/ENO1/GPM1/TPK2/FBP1/PGK1/ENO1/GPM1/TPK2/FBP1/PGK1	target_genes_regulated_specifically_by_Dal81
GO:0005991	trehalose metabolic process	4/147	15/5910	0.00040505	0.0341715	0.0307373	4	C2_03940C_A/C2_07210C_A/C2_10690W_A/CR_02820W_A	SCH9/TPK2/TPS3/PGM2/SCH9/TPK2/TPS3/PGM2/SCH9/TPK2/TPS3/PGM2/SCH9/TPK2/TPS3/PGM2	target_genes_regulated_specifically_by_Dal81
GO:0006082	organic acid metabolic process	19/123	421/5910	0.00100953	0.0261827	0.0243042	19	C1_02590C_A/C1_06900C_A/C1_10450W_A/C2_09060C_A/C3_04660C_A/C4_04410C_A/C4_06110C_A/C4_07090C_A/C5_02180C_A/C5_02270W_A/C5_05320C_A/C6_00480C_A/CR_00540C_A/CR_02360W_A/CR_05180C_A/CR_05790C_A/CR_07010W_A/CR_07050C_A/CR_07710W_A	SNZ1/MMD1/GLY1/ASN1/ARG11/LYS4/TRP5/TRP4/LEU3/THR4/HIS1/FET31/MDH1/IDP2/SDH2/ACO2/MIS11/URA2/ARO2/SNZ1/MMD1/GLY1/ASN1/ARG11/LYS4/TRP5/TRP4/LEU3/THR4/HIS1/FET31/MDH1/IDP2/SDH2/ACO2/MIS11/URA2/ARO2/SNZ1/MMD1/GLY1/ASN1/ARG11/LYS4/TRP5/TRP4/LEU3/THR4/HIS1/FET31/MDH1/IDP2/SDH2/ACO2/MIS11/URA2/ARO2/SNZ1/MMD1/GLY1/ASN1/ARG11/LYS4/TRP5/TRP4/LEU3/THR4/HIS1/FET31/MDH1/IDP2/SDH2/ACO2/MIS11/URA2/ARO2/SNZ1/MM…	target_genes_regulated_specifically_by_Stp2
GO:0019752	carboxylic acid metabolic process	19/123	408/5910	0.000689911	0.020544	0.01907	19	C1_02590C_A/C1_06900C_A/C1_10450W_A/C2_09060C_A/C3_04660C_A/C4_04410C_A/C4_06110C_A/C4_07090C_A/C5_02180C_A/C5_02270W_A/C5_05320C_A/C6_00480C_A/CR_00540C_A/CR_02360W_A/CR_05180C_A/CR_05790C_A/CR_07010W_A/CR_07050C_A/CR_07710W_A	SNZ1/MMD1/GLY1/ASN1/ARG11/LYS4/TRP5/TRP4/LEU3/THR4/HIS1/FET31/MDH1/IDP2/SDH2/ACO2/MIS11/URA2/ARO2/SNZ1/MMD1/GLY1/ASN1/ARG11/LYS4/TRP5/TRP4/LEU3/THR4/HIS1/FET31/MDH1/IDP2/SDH2/ACO2/MIS11/URA2/ARO2/SNZ1/MMD1/GLY1/ASN1/ARG11/LYS4/TRP5/TRP4/LEU3/THR4/HIS1/FET31/MDH1/IDP2/SDH2/ACO2/MIS11/URA2/ARO2/SNZ1/MMD1/GLY1/ASN1/ARG11/LYS4/TRP5/TRP4/LEU3/THR4/HIS1/FET31/MDH1/IDP2/SDH2/ACO2/MIS11/URA2/ARO2/SNZ1/MM…	target_genes_regulated_specifically_by_Stp2
GO:0043436	oxoacid metabolic process	19/123	420/5910	0.000981081	0.0261827	0.0243042	19	C1_02590C_A/C1_06900C_A/C1_10450W_A/C2_09060C_A/C3_04660C_A/C4_04410C_A/C4_06110C_A/C4_07090C_A/C5_02180C_A/C5_02270W_A/C5_05320C_A/C6_00480C_A/CR_00540C_A/CR_02360W_A/CR_05180C_A/CR_05790C_A/CR_07010W_A/CR_07050C_A/CR_07710W_A	SNZ1/MMD1/GLY1/ASN1/ARG11/LYS4/TRP5/TRP4/LEU3/THR4/HIS1/FET31/MDH1/IDP2/SDH2/ACO2/MIS11/URA2/ARO2/SNZ1/MMD1/GLY1/ASN1/ARG11/LYS4/TRP5/TRP4/LEU3/THR4/HIS1/FET31/MDH1/IDP2/SDH2/ACO2/MIS11/URA2/ARO2/SNZ1/MMD1/GLY1/ASN1/ARG11/LYS4/TRP5/TRP4/LEU3/THR4/HIS1/FET31/MDH1/IDP2/SDH2/ACO2/MIS11/URA2/ARO2/SNZ1/MMD1/GLY1/ASN1/ARG11/LYS4/TRP5/TRP4/LEU3/THR4/HIS1/FET31/MDH1/IDP2/SDH2/ACO2/MIS11/URA2/ARO2/SNZ1/MM…	target_genes_regulated_specifically_by_Stp2
GO:0044283	small molecule biosynthetic process	16/123	335/5910	0.00145091	0.0299111	0.027765	16	C1_02590C_A/C1_06900C_A/C1_10450W_A/C2_09060C_A/C3_04660C_A/C4_04410C_A/C4_06110C_A/C4_07090C_A/C5_02180C_A/C5_02270W_A/C5_05320C_A/C6_00480C_A/CR_00540C_A/CR_07010W_A/CR_07050C_A/CR_07710W_A	SNZ1/MMD1/GLY1/ASN1/ARG11/LYS4/TRP5/TRP4/LEU3/THR4/HIS1/FET31/MDH1/MIS11/URA2/ARO2/SNZ1/MMD1/GLY1/ASN1/ARG11/LYS4/TRP5/TRP4/LEU3/THR4/HIS1/FET31/MDH1/MIS11/URA2/ARO2/SNZ1/MMD1/GLY1/ASN1/ARG11/LYS4/TRP5/TRP4/LEU3/THR4/HIS1/FET31/MDH1/MIS11/URA2/ARO2/SNZ1/MMD1/GLY1/ASN1/ARG11/LYS4/TRP5/TRP4/LEU3/THR4/HIS1/FET31/MDH1/MIS11/URA2/ARO2/SNZ1/MMD1/GLY1/ASN1/ARG11/LYS4/TRP5/TRP4/LEU3/THR4/HIS1/FET31/MDH1/…	target_genes_regulated_specifically_by_Stp2
GO:0006811	monoatomic ion transport	15/123	324/5910	0.00278094	0.0475718	0.0441587	15	C1_10800C_A/C1_13350W_A/C2_06680W_A/C3_00920W_A/C3_03710W_A/C3_04660C_A/C3_05580C_A/C4_04030W_A/C5_01360W_A/C5_02790C_A/C6_00830C_A/C6_01430C_A/CR_03920C_A/CR_05480W_A/CR_07960C_A	ALP1/STP2/FRP3/ATO1/CCC1/ARG11/GAP2/JEN2/CFL4/GAP1/CAN3/FRP6/TPO4/CAWG_01871/TRK1/ALP1/STP2/FRP3/ATO1/CCC1/ARG11/GAP2/JEN2/CFL4/GAP1/CAN3/FRP6/TPO4/CAWG_01871/TRK1/ALP1/STP2/FRP3/ATO1/CCC1/ARG11/GAP2/JEN2/CFL4/GAP1/CAN3/FRP6/TPO4/CAWG_01871/TRK1/ALP1/STP2/FRP3/ATO1/CCC1/ARG11/GAP2/JEN2/CFL4/GAP1/CAN3/FRP6/TPO4/CAWG_01871/TRK1/ALP1/STP2/FRP3/ATO1/CCC1/ARG11/GAP2/JEN2/CFL4/GAP1/CAN3/FRP6/TPO4/CAWG_…	target_genes_regulated_specifically_by_Stp2
GO:0016053	organic acid biosynthetic process	15/123	209/5910	2.44032e-05	0.00192153	0.00178367	15	C1_02590C_A/C1_06900C_A/C1_10450W_A/C2_09060C_A/C3_04660C_A/C4_04410C_A/C4_06110C_A/C4_07090C_A/C5_02180C_A/C5_02270W_A/C5_05320C_A/C6_00480C_A/CR_07010W_A/CR_07050C_A/CR_07710W_A	SNZ1/MMD1/GLY1/ASN1/ARG11/LYS4/TRP5/TRP4/LEU3/THR4/HIS1/FET31/MIS11/URA2/ARO2/SNZ1/MMD1/GLY1/ASN1/ARG11/LYS4/TRP5/TRP4/LEU3/THR4/HIS1/FET31/MIS11/URA2/ARO2/SNZ1/MMD1/GLY1/ASN1/ARG11/LYS4/TRP5/TRP4/LEU3/THR4/HIS1/FET31/MIS11/URA2/ARO2/SNZ1/MMD1/GLY1/ASN1/ARG11/LYS4/TRP5/TRP4/LEU3/THR4/HIS1/FET31/MIS11/URA2/ARO2/SNZ1/MMD1/GLY1/ASN1/ARG11/LYS4/TRP5/TRP4/LEU3/THR4/HIS1/FET31/MIS11/URA2/ARO2/SNZ1/MMD1…	target_genes_regulated_specifically_by_Stp2
GO:0046394	carboxylic acid biosynthetic process	15/123	209/5910	2.44032e-05	0.00192153	0.00178367	15	C1_02590C_A/C1_06900C_A/C1_10450W_A/C2_09060C_A/C3_04660C_A/C4_04410C_A/C4_06110C_A/C4_07090C_A/C5_02180C_A/C5_02270W_A/C5_05320C_A/C6_00480C_A/CR_07010W_A/CR_07050C_A/CR_07710W_A	SNZ1/MMD1/GLY1/ASN1/ARG11/LYS4/TRP5/TRP4/LEU3/THR4/HIS1/FET31/MIS11/URA2/ARO2/SNZ1/MMD1/GLY1/ASN1/ARG11/LYS4/TRP5/TRP4/LEU3/THR4/HIS1/FET31/MIS11/URA2/ARO2/SNZ1/MMD1/GLY1/ASN1/ARG11/LYS4/TRP5/TRP4/LEU3/THR4/HIS1/FET31/MIS11/URA2/ARO2/SNZ1/MMD1/GLY1/ASN1/ARG11/LYS4/TRP5/TRP4/LEU3/THR4/HIS1/FET31/MIS11/URA2/ARO2/SNZ1/MMD1/GLY1/ASN1/ARG11/LYS4/TRP5/TRP4/LEU3/THR4/HIS1/FET31/MIS11/URA2/ARO2/SNZ1/MMD1…	target_genes_regulated_specifically_by_Stp2
GO:0006520	amino acid metabolic process	13/123	213/5910	0.000442267	0.0148159	0.0137529	13	C1_02590C_A/C1_06900C_A/C1_10450W_A/C2_09060C_A/C3_04660C_A/C4_04410C_A/C4_06110C_A/C4_07090C_A/C5_02180C_A/C5_02270W_A/C5_05320C_A/CR_07050C_A/CR_07710W_A	SNZ1/MMD1/GLY1/ASN1/ARG11/LYS4/TRP5/TRP4/LEU3/THR4/HIS1/URA2/ARO2/SNZ1/MMD1/GLY1/ASN1/ARG11/LYS4/TRP5/TRP4/LEU3/THR4/HIS1/URA2/ARO2/SNZ1/MMD1/GLY1/ASN1/ARG11/LYS4/TRP5/TRP4/LEU3/THR4/HIS1/URA2/ARO2/SNZ1/MMD1/GLY1/ASN1/ARG11/LYS4/TRP5/TRP4/LEU3/THR4/HIS1/URA2/ARO2/SNZ1/MMD1/GLY1/ASN1/ARG11/LYS4/TRP5/TRP4/LEU3/THR4/HIS1/URA2/ARO2/SNZ1/MMD1/GLY1/ASN1/ARG11/LYS4/TRP5/TRP4/LEU3/THR4/HIS1/URA2/ARO2/SNZ…	target_genes_regulated_specifically_by_Stp2
GO:0008652	amino acid biosynthetic process	13/123	114/5910	5.3299e-07	0.000314203	0.00029166	13	C1_02590C_A/C1_06900C_A/C1_10450W_A/C2_09060C_A/C3_04660C_A/C4_04410C_A/C4_06110C_A/C4_07090C_A/C5_02180C_A/C5_02270W_A/C5_05320C_A/CR_07050C_A/CR_07710W_A	SNZ1/MMD1/GLY1/ASN1/ARG11/LYS4/TRP5/TRP4/LEU3/THR4/HIS1/URA2/ARO2/SNZ1/MMD1/GLY1/ASN1/ARG11/LYS4/TRP5/TRP4/LEU3/THR4/HIS1/URA2/ARO2/SNZ1/MMD1/GLY1/ASN1/ARG11/LYS4/TRP5/TRP4/LEU3/THR4/HIS1/URA2/ARO2/SNZ1/MMD1/GLY1/ASN1/ARG11/LYS4/TRP5/TRP4/LEU3/THR4/HIS1/URA2/ARO2/SNZ1/MMD1/GLY1/ASN1/ARG11/LYS4/TRP5/TRP4/LEU3/THR4/HIS1/URA2/ARO2/SNZ1/MMD1/GLY1/ASN1/ARG11/LYS4/TRP5/TRP4/LEU3/THR4/HIS1/URA2/ARO2/SNZ…	target_genes_regulated_specifically_by_Stp2
GO:0006820	monoatomic anion transport	12/123	185/5910	0.000427501	0.0148159	0.0137529	12	C1_10800C_A/C1_13350W_A/C2_06680W_A/C3_00920W_A/C3_04660C_A/C3_05580C_A/C4_04030W_A/C5_02790C_A/C6_00830C_A/C6_01430C_A/CR_05480W_A/CR_07960C_A	ALP1/STP2/FRP3/ATO1/ARG11/GAP2/JEN2/GAP1/CAN3/FRP6/CAWG_01871/TRK1/ALP1/STP2/FRP3/ATO1/ARG11/GAP2/JEN2/GAP1/CAN3/FRP6/CAWG_01871/TRK1/ALP1/STP2/FRP3/ATO1/ARG11/GAP2/JEN2/GAP1/CAN3/FRP6/CAWG_01871/TRK1/ALP1/STP2/FRP3/ATO1/ARG11/GAP2/JEN2/GAP1/CAN3/FRP6/CAWG_01871/TRK1/ALP1/STP2/FRP3/ATO1/ARG11/GAP2/JEN2/GAP1/CAN3/FRP6/CAWG_01871/TRK1/ALP1/STP2/FRP3/ATO1/ARG11/GAP2/JEN2/GAP1/CAN3/FRP6/CAWG_01871/TR…	target_genes_regulated_specifically_by_Stp2
GO:1901605	alpha-amino acid metabolic process	12/123	150/5910	5.85503e-05	0.00392287	0.00364142	12	C1_02590C_A/C1_06900C_A/C1_10450W_A/C2_09060C_A/C3_04660C_A/C4_04410C_A/C4_06110C_A/C4_07090C_A/C5_02180C_A/C5_02270W_A/C5_05320C_A/CR_07050C_A	SNZ1/MMD1/GLY1/ASN1/ARG11/LYS4/TRP5/TRP4/LEU3/THR4/HIS1/URA2/SNZ1/MMD1/GLY1/ASN1/ARG11/LYS4/TRP5/TRP4/LEU3/THR4/HIS1/URA2/SNZ1/MMD1/GLY1/ASN1/ARG11/LYS4/TRP5/TRP4/LEU3/THR4/HIS1/URA2/SNZ1/MMD1/GLY1/ASN1/ARG11/LYS4/TRP5/TRP4/LEU3/THR4/HIS1/URA2/SNZ1/MMD1/GLY1/ASN1/ARG11/LYS4/TRP5/TRP4/LEU3/THR4/HIS1/URA2/SNZ1/MMD1/GLY1/ASN1/ARG11/LYS4/TRP5/TRP4/LEU3/THR4/HIS1/URA2/SNZ1/MMD1/GLY1/ASN1/ARG11/LYS4/TR…	target_genes_regulated_specifically_by_Stp2
GO:1901607	alpha-amino acid biosynthetic process	12/123	104/5910	1.31858e-06	0.000314203	0.00029166	12	C1_02590C_A/C1_06900C_A/C1_10450W_A/C2_09060C_A/C3_04660C_A/C4_04410C_A/C4_06110C_A/C4_07090C_A/C5_02180C_A/C5_02270W_A/C5_05320C_A/CR_07050C_A	SNZ1/MMD1/GLY1/ASN1/ARG11/LYS4/TRP5/TRP4/LEU3/THR4/HIS1/URA2/SNZ1/MMD1/GLY1/ASN1/ARG11/LYS4/TRP5/TRP4/LEU3/THR4/HIS1/URA2/SNZ1/MMD1/GLY1/ASN1/ARG11/LYS4/TRP5/TRP4/LEU3/THR4/HIS1/URA2/SNZ1/MMD1/GLY1/ASN1/ARG11/LYS4/TRP5/TRP4/LEU3/THR4/HIS1/URA2/SNZ1/MMD1/GLY1/ASN1/ARG11/LYS4/TRP5/TRP4/LEU3/THR4/HIS1/URA2/SNZ1/MMD1/GLY1/ASN1/ARG11/LYS4/TRP5/TRP4/LEU3/THR4/HIS1/URA2/SNZ1/MMD1/GLY1/ASN1/ARG11/LYS4/TR…	target_genes_regulated_specifically_by_Stp2
GO:0015711	organic anion transport	11/123	156/5910	0.00036762	0.0147783	0.013718	11	C1_10800C_A/C1_13350W_A/C2_06680W_A/C3_00920W_A/C3_04660C_A/C3_05580C_A/C4_04030W_A/C5_02790C_A/C6_00830C_A/C6_01430C_A/CR_05480W_A	ALP1/STP2/FRP3/ATO1/ARG11/GAP2/JEN2/GAP1/CAN3/FRP6/CAWG_01871/ALP1/STP2/FRP3/ATO1/ARG11/GAP2/JEN2/GAP1/CAN3/FRP6/CAWG_01871/ALP1/STP2/FRP3/ATO1/ARG11/GAP2/JEN2/GAP1/CAN3/FRP6/CAWG_01871/ALP1/STP2/FRP3/ATO1/ARG11/GAP2/JEN2/GAP1/CAN3/FRP6/CAWG_01871/ALP1/STP2/FRP3/ATO1/ARG11/GAP2/JEN2/GAP1/CAN3/FRP6/CAWG_01871/ALP1/STP2/FRP3/ATO1/ARG11/GAP2/JEN2/GAP1/CAN3/FRP6/CAWG_01871/ALP1/STP2/FRP3/ATO1/ARG11/G…	target_genes_regulated_specifically_by_Stp2
GO:0015849	organic acid transport	11/123	91/5910	2.3448e-06	0.000314203	0.00029166	11	C1_10800C_A/C1_13350W_A/C2_06680W_A/C3_00920W_A/C3_04660C_A/C3_05580C_A/C4_04030W_A/C5_02790C_A/C6_00830C_A/C6_01430C_A/CR_05480W_A	ALP1/STP2/FRP3/ATO1/ARG11/GAP2/JEN2/GAP1/CAN3/FRP6/CAWG_01871/ALP1/STP2/FRP3/ATO1/ARG11/GAP2/JEN2/GAP1/CAN3/FRP6/CAWG_01871/ALP1/STP2/FRP3/ATO1/ARG11/GAP2/JEN2/GAP1/CAN3/FRP6/CAWG_01871/ALP1/STP2/FRP3/ATO1/ARG11/GAP2/JEN2/GAP1/CAN3/FRP6/CAWG_01871/ALP1/STP2/FRP3/ATO1/ARG11/GAP2/JEN2/GAP1/CAN3/FRP6/CAWG_01871/ALP1/STP2/FRP3/ATO1/ARG11/GAP2/JEN2/GAP1/CAN3/FRP6/CAWG_01871/ALP1/STP2/FRP3/ATO1/ARG11/G…	target_genes_regulated_specifically_by_Stp2
GO:0034220	monoatomic ion transmembrane transport	11/123	181/5910	0.00127929	0.0271826	0.0252324	11	C1_10800C_A/C2_06680W_A/C3_00920W_A/C3_04660C_A/C3_05580C_A/C4_04030W_A/C5_02790C_A/C6_00830C_A/C6_01430C_A/CR_05480W_A/CR_07960C_A	ALP1/FRP3/ATO1/ARG11/GAP2/JEN2/GAP1/CAN3/FRP6/CAWG_01871/TRK1/ALP1/FRP3/ATO1/ARG11/GAP2/JEN2/GAP1/CAN3/FRP6/CAWG_01871/TRK1/ALP1/FRP3/ATO1/ARG11/GAP2/JEN2/GAP1/CAN3/FRP6/CAWG_01871/TRK1/ALP1/FRP3/ATO1/ARG11/GAP2/JEN2/GAP1/CAN3/FRP6/CAWG_01871/TRK1/ALP1/FRP3/ATO1/ARG11/GAP2/JEN2/GAP1/CAN3/FRP6/CAWG_01871/TRK1/ALP1/FRP3/ATO1/ARG11/GAP2/JEN2/GAP1/CAN3/FRP6/CAWG_01871/TRK1/ALP1/FRP3/ATO1/ARG11/GAP2/J…	target_genes_regulated_specifically_by_Stp2
GO:0046942	carboxylic acid transport	11/123	91/5910	2.3448e-06	0.000314203	0.00029166	11	C1_10800C_A/C1_13350W_A/C2_06680W_A/C3_00920W_A/C3_04660C_A/C3_05580C_A/C4_04030W_A/C5_02790C_A/C6_00830C_A/C6_01430C_A/CR_05480W_A	ALP1/STP2/FRP3/ATO1/ARG11/GAP2/JEN2/GAP1/CAN3/FRP6/CAWG_01871/ALP1/STP2/FRP3/ATO1/ARG11/GAP2/JEN2/GAP1/CAN3/FRP6/CAWG_01871/ALP1/STP2/FRP3/ATO1/ARG11/GAP2/JEN2/GAP1/CAN3/FRP6/CAWG_01871/ALP1/STP2/FRP3/ATO1/ARG11/GAP2/JEN2/GAP1/CAN3/FRP6/CAWG_01871/ALP1/STP2/FRP3/ATO1/ARG11/GAP2/JEN2/GAP1/CAN3/FRP6/CAWG_01871/ALP1/STP2/FRP3/ATO1/ARG11/GAP2/JEN2/GAP1/CAN3/FRP6/CAWG_01871/ALP1/STP2/FRP3/ATO1/ARG11/G…	target_genes_regulated_specifically_by_Stp2
GO:0098656	monoatomic anion transmembrane transport	10/123	96/5910	2.62896e-05	0.00192153	0.00178367	10	C1_10800C_A/C2_06680W_A/C3_00920W_A/C3_04660C_A/C3_05580C_A/C4_04030W_A/C5_02790C_A/C6_00830C_A/C6_01430C_A/CR_05480W_A	ALP1/FRP3/ATO1/ARG11/GAP2/JEN2/GAP1/CAN3/FRP6/CAWG_01871/ALP1/FRP3/ATO1/ARG11/GAP2/JEN2/GAP1/CAN3/FRP6/CAWG_01871/ALP1/FRP3/ATO1/ARG11/GAP2/JEN2/GAP1/CAN3/FRP6/CAWG_01871/ALP1/FRP3/ATO1/ARG11/GAP2/JEN2/GAP1/CAN3/FRP6/CAWG_01871/ALP1/FRP3/ATO1/ARG11/GAP2/JEN2/GAP1/CAN3/FRP6/CAWG_01871/ALP1/FRP3/ATO1/ARG11/GAP2/JEN2/GAP1/CAN3/FRP6/CAWG_01871/ALP1/FRP3/ATO1/ARG11/GAP2/JEN2/GAP1/CAN3/FRP6/CAWG_01871/…	target_genes_regulated_specifically_by_Stp2
GO:1903825	organic acid transmembrane transport	10/123	73/5910	2.16825e-06	0.000314203	0.00029166	10	C1_10800C_A/C2_06680W_A/C3_00920W_A/C3_04660C_A/C3_05580C_A/C4_04030W_A/C5_02790C_A/C6_00830C_A/C6_01430C_A/CR_05480W_A	ALP1/FRP3/ATO1/ARG11/GAP2/JEN2/GAP1/CAN3/FRP6/CAWG_01871/ALP1/FRP3/ATO1/ARG11/GAP2/JEN2/GAP1/CAN3/FRP6/CAWG_01871/ALP1/FRP3/ATO1/ARG11/GAP2/JEN2/GAP1/CAN3/FRP6/CAWG_01871/ALP1/FRP3/ATO1/ARG11/GAP2/JEN2/GAP1/CAN3/FRP6/CAWG_01871/ALP1/FRP3/ATO1/ARG11/GAP2/JEN2/GAP1/CAN3/FRP6/CAWG_01871/ALP1/FRP3/ATO1/ARG11/GAP2/JEN2/GAP1/CAN3/FRP6/CAWG_01871/ALP1/FRP3/ATO1/ARG11/GAP2/JEN2/GAP1/CAN3/FRP6/CAWG_01871/…	target_genes_regulated_specifically_by_Stp2
GO:1905039	carboxylic acid transmembrane transport	10/123	73/5910	2.16825e-06	0.000314203	0.00029166	10	C1_10800C_A/C2_06680W_A/C3_00920W_A/C3_04660C_A/C3_05580C_A/C4_04030W_A/C5_02790C_A/C6_00830C_A/C6_01430C_A/CR_05480W_A	ALP1/FRP3/ATO1/ARG11/GAP2/JEN2/GAP1/CAN3/FRP6/CAWG_01871/ALP1/FRP3/ATO1/ARG11/GAP2/JEN2/GAP1/CAN3/FRP6/CAWG_01871/ALP1/FRP3/ATO1/ARG11/GAP2/JEN2/GAP1/CAN3/FRP6/CAWG_01871/ALP1/FRP3/ATO1/ARG11/GAP2/JEN2/GAP1/CAN3/FRP6/CAWG_01871/ALP1/FRP3/ATO1/ARG11/GAP2/JEN2/GAP1/CAN3/FRP6/CAWG_01871/ALP1/FRP3/ATO1/ARG11/GAP2/JEN2/GAP1/CAN3/FRP6/CAWG_01871/ALP1/FRP3/ATO1/ARG11/GAP2/JEN2/GAP1/CAN3/FRP6/CAWG_01871/…	target_genes_regulated_specifically_by_Stp2
GO:0006855	xenobiotic transmembrane transport	8/123	55/5910	1.50379e-05	0.00151131	0.00140288	8	C2_06680W_A/C3_00920W_A/C3_04660C_A/C3_05580C_A/C5_02790C_A/C6_01430C_A/CR_03920C_A/CR_05480W_A	FRP3/ATO1/ARG11/GAP2/GAP1/FRP6/TPO4/CAWG_01871/FRP3/ATO1/ARG11/GAP2/GAP1/FRP6/TPO4/CAWG_01871/FRP3/ATO1/ARG11/GAP2/GAP1/FRP6/TPO4/CAWG_01871/FRP3/ATO1/ARG11/GAP2/GAP1/FRP6/TPO4/CAWG_01871/FRP3/ATO1/ARG11/GAP2/GAP1/FRP6/TPO4/CAWG_01871/FRP3/ATO1/ARG11/GAP2/GAP1/FRP6/TPO4/CAWG_01871/FRP3/ATO1/ARG11/GAP2/GAP1/FRP6/TPO4/CAWG_01871/FRP3/ATO1/ARG11/GAP2/GAP1/FRP6/TPO4/CAWG_01871	target_genes_regulated_specifically_by_Stp2
GO:0006865	amino acid transport	7/123	55/5910	0.000126267	0.00597171	0.00554326	7	C1_10800C_A/C1_13350W_A/C3_04660C_A/C3_05580C_A/C5_02790C_A/C6_00830C_A/CR_05480W_A	ALP1/STP2/ARG11/GAP2/GAP1/CAN3/CAWG_01871/ALP1/STP2/ARG11/GAP2/GAP1/CAN3/CAWG_01871/ALP1/STP2/ARG11/GAP2/GAP1/CAN3/CAWG_01871/ALP1/STP2/ARG11/GAP2/GAP1/CAN3/CAWG_01871/ALP1/STP2/ARG11/GAP2/GAP1/CAN3/CAWG_01871/ALP1/STP2/ARG11/GAP2/GAP1/CAN3/CAWG_01871/ALP1/STP2/ARG11/GAP2/GAP1/CAN3/CAWG_01871	target_genes_regulated_specifically_by_Stp2
GO:0003333	amino acid transmembrane transport	6/123	48/5910	0.000431656	0.0148159	0.0137529	6	C1_10800C_A/C3_04660C_A/C3_05580C_A/C5_02790C_A/C6_00830C_A/CR_05480W_A	ALP1/ARG11/GAP2/GAP1/CAN3/CAWG_01871/ALP1/ARG11/GAP2/GAP1/CAN3/CAWG_01871/ALP1/ARG11/GAP2/GAP1/CAN3/CAWG_01871/ALP1/ARG11/GAP2/GAP1/CAN3/CAWG_01871/ALP1/ARG11/GAP2/GAP1/CAN3/CAWG_01871/ALP1/ARG11/GAP2/GAP1/CAN3/CAWG_01871	target_genes_regulated_specifically_by_Stp2
GO:0009073	aromatic amino acid family biosynthetic process	4/123	25/5910	0.0016108	0.0301183	0.0279574	4	C4_06110C_A/C4_07090C_A/C5_05320C_A/CR_07710W_A	TRP5/TRP4/HIS1/ARO2/TRP5/TRP4/HIS1/ARO2/TRP5/TRP4/HIS1/ARO2/TRP5/TRP4/HIS1/ARO2	target_genes_regulated_specifically_by_Stp2
GO:0015807	L-amino acid transport	4/123	13/5910	0.000110472	0.00555121	0.00515293	4	C3_04660C_A/C3_05580C_A/C5_02790C_A/CR_05480W_A	ARG11/GAP2/GAP1/CAWG_01871/ARG11/GAP2/GAP1/CAWG_01871/ARG11/GAP2/GAP1/CAWG_01871/ARG11/GAP2/GAP1/CAWG_01871	target_genes_regulated_specifically_by_Stp2
GO:0072350	tricarboxylic acid metabolic process	4/123	25/5910	0.0016108	0.0301183	0.0279574	4	CR_00540C_A/CR_02360W_A/CR_05180C_A/CR_05790C_A	MDH1/IDP2/SDH2/ACO2/MDH1/IDP2/SDH2/ACO2/MDH1/IDP2/SDH2/ACO2/MDH1/IDP2/SDH2/ACO2	target_genes_regulated_specifically_by_Stp2
GO:0098739	import across plasma membrane	4/123	26/5910	0.00187336	0.0334707	0.0310693	4	C2_04940C_A/C3_05580C_A/C5_02790C_A/CR_07960C_A	ITR1/GAP2/GAP1/TRK1/ITR1/GAP2/GAP1/TRK1/ITR1/GAP2/GAP1/TRK1/ITR1/GAP2/GAP1/TRK1	target_genes_regulated_specifically_by_Stp2
GO:1902475	L-alpha-amino acid transmembrane transport	4/123	13/5910	0.000110472	0.00555121	0.00515293	4	C3_04660C_A/C3_05580C_A/C5_02790C_A/CR_05480W_A	ARG11/GAP2/GAP1/CAWG_01871/ARG11/GAP2/GAP1/CAWG_01871/ARG11/GAP2/GAP1/CAWG_01871/ARG11/GAP2/GAP1/CAWG_01871	target_genes_regulated_specifically_by_Stp2
GO:0006846	acetate transport	3/123	11/5910	0.00128475	0.0271826	0.0252324	3	C2_06680W_A/C3_00920W_A/C6_01430C_A	FRP3/ATO1/FRP6/FRP3/ATO1/FRP6/FRP3/ATO1/FRP6	target_genes_regulated_specifically_by_Stp2
GO:0006847	plasma membrane acetate transport	3/123	11/5910	0.00128475	0.0271826	0.0252324	3	C2_06680W_A/C3_00920W_A/C6_01430C_A	FRP3/ATO1/FRP6/FRP3/ATO1/FRP6/FRP3/ATO1/FRP6	target_genes_regulated_specifically_by_Stp2
GO:0035433	acetate transmembrane transport	3/123	11/5910	0.00128475	0.0271826	0.0252324	3	C2_06680W_A/C3_00920W_A/C6_01430C_A	FRP3/ATO1/FRP6/FRP3/ATO1/FRP6/FRP3/ATO1/FRP6	target_genes_regulated_specifically_by_Stp2
GO:0043090	amino acid import	3/123	13/5910	0.00216008	0.0377544	0.0350457	3	C1_13350W_A/C3_05580C_A/C5_02790C_A	STP2/GAP2/GAP1/STP2/GAP2/GAP1/STP2/GAP2/GAP1	target_genes_regulated_specifically_by_Stp2
