# Supplementary material for: Coordinated regulation of pH alkalinization by two transcription factors promotes fungal commensalism and pathogenicity
Source: Nat Commun. 2025 Aug 22;16:7855. doi: 10.1038/s41467-025-62953-x (PMC12373999; doi:10.1038/s41467-025-62953-x)
Supplement: Supplementary file 9 — Supplementary Data 7 [file 41467_2025_62953_MOESM9_ESM.xlsx]

## Sheet: Sheet1
Supplementary Data 7. C. albicans strains used in this study
Strains	Relevant Genotype	Full Genotype	Reference
SC5314	WT	C.albicans wild-type strain	1
SN250	WT	leu2Δ::C.m.LEU2/leu2Δ::C.d.HIS1, his1Δ/his1Δ, arg4Δ/arg4Δ, leu2D/leu2Δ ura3Δ/URA3, iro1Δ/IRO1	1
ycb149	dal81Δ/Δ	dal81Δ::C.m.LEU2/dal81Δ::C.d.HIS1, his1Δ/his1Δ, arg4Δ/arg4Δ, leu2Δ/leu2Δ, ura3Δ/URA3, iro1Δ/IRO1	1
ycb150	DAL81 addback	arg4Δ/arg4Δ, leu2Δ/leu2Δ::DAL81::C.d.ARG4, his1Δ/his1Δ, ura3Δ/URA3, iro1Δ/IRO1, dal81Δ::C.d.HIS1/dal81Δ::C.m.LEU2	This study
ycb174	Dal81-Myc/DAL81	DAL81-13xMyc/DAL81, leu2Δ::C.m.LEU2/leu2Δ::C.d.HIS1, his1Δ/his1Δ, arg4Δ/arg4Δ, leu2D/leu2Δ ura3Δ/URA3, iro1Δ/IRO1	This study
ycb182	stp2Δ/Δ	stp2Δ::C.m.LEU2/ stp2Δ::C.d.HIS1, his1Δ/his1Δ, arg4Δ/arg4Δ, leu2Δ/leu2Δ, ura3Δ/URA3, iro1Δ/IRO1	Gift from Prof.Guanghua Huang ‘s lab at Fudan University
ycb183	Stp2-HA/STP2	STP2-3xHA-FLP-SAT1/STP2, leu2Δ::C.m.LEU2/leu2Δ::C.d.HIS1, his1Δ/his1Δ, arg4Δ/arg4Δ, leu2D/leu2Δ ura3Δ/URA3, iro1Δ/IRO1	This study
ycb184	Dal81-Myc/DAL81, stp2Δ/Δ	DAL81-13xMyc-FLP-SAT1/DAL81, his1Δ/his1Δ, stp2Δ::C.m.LEU2/stp2Δ::C.d.HIS1, arg4Δ/arg4Δ, leu2Δ/leu2Δ, ura3Δ/URA3, iro1Δ/IRO	This study
ycb185	Dal81-Myc/DAL81, Stp2-HA/STP2	DAL81-13xMyc/DAL81, Stp2-3xHA/STP2, leu2Δ::C.m.LEU2/leu2Δ::C.d.HIS1, his1Δ/his1Δ, arg4Δ/arg4Δ, leu2D/leu2Δ ura3Δ/URA3, iro1Δ/IRO1	This study
ycb598	Stp2-HA/STP2, dal81Δ/Δ	Stp2-3xHA-FLP-SAT1/STP2, his1Δ/his1Δ, dal81 Δ::C.m.LEU2/dal81Δ::C.d.HIS1, arg4Δ/arg4Δ, leu2Δ/leu2Δ, ura3Δ/URA3, iro1Δ/IRO	This study
ycb610	STP2OE	STP2::NAT1-TDH3p-STP2-3xHA/STP2, his1Δ/his1Δ, arg4Δ/arg4Δ, leu2Δ/leu2Δ, ura3Δ/URA3, iro1Δ/IRO1	This study
ycb611	dal81Δ/Δ(STP2OE)	STP2::NAT1-TDH3p-STP2-3xHA/STP2, his1Δ/his1Δ, dal81 Δ::C.m.LEU2/dal81Δ::C.d.HIS1, arg4Δ/arg4Δ, leu2Δ/leu2Δ, ura3Δ/URA3, iro1Δ/IRO1	This study
ycb612	STP2*OE	STP2*::NAT1-TDH3p-STP2*-3xHA/STP2, his1Δ/his1Δ, arg4Δ/arg4Δ, leu2Δ/leu2Δ, ura3Δ/URA3, iro1Δ/IRO1	This study
ycb613	dal81Δ/Δ(STP2*OE)	STP2*::NAT1-TDH3p-STP2*-3xHA/STP2, his1Δ/his1Δ, dal81 Δ::C.m.LEU2/dal81Δ::C.d.HIS1, arg4Δ/arg4Δ, leu2Δ/leu2Δ, ura3Δ/URA3, iro1Δ/IRO1	This study
ycb788	DAL81OE	DAL81::NAT1-TDH3p-DAL81-13xMyc/DAL81, his1Δ/his1Δ, arg4Δ/arg4Δ, leu2Δ/leu2Δ, ura3Δ/URA3, iro1Δ/IRO1	This study
ycb789	stp2Δ/Δ(DAL81OE)	DAL81::NAT1-TDH3p-DAL81-13xMyc/DAL81, his1Δ/his1Δ, stp2 Δ::C.m.LEU2/stp2Δ::C.d.HIS1,arg4Δ/arg4Δ, leu2Δ/leu2Δ, ura3Δ/URA3, iro1Δ/IRO1	This study
ycb861	dal81Δ/Δstp2Δ/Δ	dal81Δ::C.m.LEU2/dal81Δ::C.d.HIS1, stp2Δ::FLP-SAT1/stp2Δ,his1Δ/his1Δ, arg4Δ/arg4Δ, leu2Δ/leu2Δ, ura3Δ/URA3, iro1Δ/IRO1	This study
ycb506	grr1Δ/Δ M1	grr1Δ::C.m.LEU2/grr1Δ::C.d.HIS1, his1Δ/his1Δ, arg4Δ/arg4Δ, leu2Δ/leu2Δ, ura3Δ/URA3, iro1Δ/IRO1	Noble et al., 2010
ycb704	grr1Δ/Δ M2	grr1Δ::C.m.LEU2/grr1Δ::C.d.HIS1, his1Δ/his1Δ, arg4Δ/arg4Δ, leu2Δ/leu2Δ, ura3Δ/URA3, iro1Δ/IRO1	1
ycb971	Y187	MATa, ura3-52, his3-200, ade2-101, trp1-901, leu2-3, 112, gal4∆, gal80∆, met–, URA3: : GAL1UAS –Gal1TATA –LacZ, MEL1	2
ycb286	pGADT7 AD in Y187	MATa, ura3-52, his3-200, ade2-101, trp1-901, leu2-3, 112, gal4∆, gal80∆, met–, URA3: : GAL1UAS –Gal1TATA –LacZ, MEL1	This study
ycb238	pGADT7-T in Y187	MATa, ura3-52, his3-200, ade2-101, trp1-901, leu2-3, 112, gal4∆, gal80∆, met–, URA3:: GAL1UAS –Gal1TATA –LacZ, MEL1	This study
ycb973	pGADT7-Dal81 in Y187	MATa, ura3-52, his3-200, ade2-101, trp1-901, leu2-3, 112, gal4∆, gal80∆, met–, URA3:: GAL1UAS –Gal1TATA –LacZ, MEL1	This study
ycb972	Y2HGold	MATa, trp1-901, leu2-3, 112, ura3-52, his3-200, gal4∆, gal80∆, LYS2:: GAL1UAS –Gal1TATA –His3, GAL2UAS –Gal2TATA –Ade2 URA3 : : MEL1UAS –Mel1TATA AUR1-C MEL1	Clontech
ycb291	pGBKT7 BD in Y2HGold	MATa, trp1-901, leu2-3, 112, ura3-52, his3-200, gal4∆, gal80∆, LYS2:: GAL1UAS –Gal1TATA –His3, GAL2UAS –Gal2TATA –Ade2 URA3 : : MEL1UAS –Mel1TATA AUR1-C MEL1	This study
ycb237	pGBKT7-p53 in Y2HGold	MATa, trp1-901, leu2-3, 112, ura3-52, his3-200, gal4∆, gal80∆, LYS2: : GAL1UAS –Gal1TATA –His3, GAL2UAS –Gal2TATA –Ade2 URA3 : : MEL1UAS –Mel1TATA AUR1-C MEL1	This study
ycb974	pGBKT7-Stp2 in Y2HGold	MATa, trp1-901, leu2-3, 112, ura3-52, his3-200, gal4∆, gal80∆, LYS2:: GAL1UAS –Gal1TATA –His3, GAL2UAS –Gal2TATA –Ade2 URA3 : : MEL1UAS –Mel1TATA AUR1-C MEL1	This study
ycb1340	DAL81/dal81Δ	arg4Δ/arg4Δ, leu2Δ/leu2Δ::DAL81-13xMyc::C.d.ARG4, his1Δ/his1Δ, ura3Δ/URA3, iro1Δ/IRO1, dal81Δ::C.d.HIS1/dal81Δ::C.m.LEU2, Stp2-3xHA/STP2	This study
ycb1341	DAL81m21/dal81Δ	arg4Δ/arg4Δ, leu2Δ/leu2Δ::DAL81m21-13xMyc::C.d.ARG4, his1Δ/his1Δ, ura3Δ/URA3, iro1Δ/IRO1, dal81Δ::C.d.HIS1/dal81Δ::C.m.LEU2, Stp2-3xHA/STP2	This study
ycb1342	DAL81m2/dal81Δ	arg4Δ/arg4Δ, leu2Δ/leu2Δ::DAL81m2-13xMyc::C.d.ARG4, his1Δ/his1Δ, ura3Δ/URA3, iro1Δ/IRO1, dal81Δ::C.d.HIS1/dal81Δ::C.m.LEU2, Stp2-3xHA/STP2	This study
ycb1391	dal81Δ/Δ M1	dal81Δ::FRT/dal81Δ::FRT	This study
References
1	M. Noble, S. French, L. A. Kohn, V. Chen, A. D. Johnson, Systematic screens of a Candida albicans homozygous deletion library decouple morphogenetic switching and pathogenicity. Nature genetics 42, 590-598 (2010).
2	J. W. Harper, G. R. Adami, N. Wei, K. Keyomarsi, S. J. Elledge, The p21 Cdk-interacting protein Cip1 is a potent inhibitor of G1 cyclin-dependent kinases. Cell 75, 805-816 (1993).
