# Supplementary material for: Coordinated regulation of pH alkalinization by two transcription factors promotes fungal commensalism and pathogenicity
Source: Nat Commun. 2025 Aug 22;16:7855. doi: 10.1038/s41467-025-62953-x (PMC12373999; doi:10.1038/s41467-025-62953-x)
Supplement: Supplementary file 10 — Supplementary Data 8 [file 41467_2025_62953_MOESM10_ESM.xlsx]

## Sheet: Sheet1
Supplementary Data 8. Primers used in this study
Primers	5'-3' sequences	Purpose
5' flank-F	ggcgaattggagctccaccgcggtggcggccgctctagaactagtgGATCgtttaaacCTTCATCCACAAAGGAAGAAACTG	Construction of Dal81-13xMyc plasmid
5' flank-R	GTTCACCGTTAATTAACCCGGGGATCCGTTTGGTTAGTTCGGGTGATTTTACTGG
13xMyc-FLP-SAT1- F	CCAGTAAAATCACCCGAACTAACCAAAcggatccccgggttaattaacggtgaac
13xMyc-FLP-SAT1-R	CAAGAGCTAGAATTGTTGCTGAATCGGCGGCCGCTCTAGAACTAGTGGATC
3' flank--F	gatccactagttctagagcggccgccGATTCAGCAACAATTCTAGCTCTTG
3' flank-R	GTCGACGGTATCGATAAGCTTGATATCGAATTCCTGCAGCCCGGGGGATCGTTTAAACAGCATCACTTACCGCTGCTATATG
5' flank-F	ggcgaattggagctccaccgcggtggcggccgctctagaactagtgGATCgtttaaacACAACAACACCAACACCAACAC	Construction of Stp2-3xHA plasmid
5' flank-R	gaacatcgtatgggtaaaagatgttGAAATACATTGATGGTTGTTGTTG
3xHA -FLP-SAT1- F	CAACAACAACCATCAATGTATTTCaacatcttttacccatacgatgttc
3xHA -FLP-SAT1-R	GGTAACGATGATGGTGGGAAATATggcggccgctctagaactagtggatc
3' flank--F	gatccactagttctagagcggccgccATATTTCCCACCATCATCGTTACC
3' flank-R	gtcgacggtatcgataagcttgatatcgaattcctgcagcccgggggatcgtttaaacGAGGAAACTTATTGACACTGACACA
C.a Leu2 upstream-F	ggcgaattggagctccaccgcggtggcggccgctctagaactagtgGATCgtttaaacTTGGTAGATTTACAACTGAAGCCG	Construction of DAL81 addback plasmid
C.a Leu2 upstream-R	CATATAGCAGCGGTAAGTGATGCTGAAAAGGGGAGTATTTCTGGAGTGAA
DAL81 promoter-ORF-F	CGATACATTTGCGGTACAGAAATGTTAACCGCCACCTCTACTCATATTG
DAL81 promoter-ORF-R	AGGAGATACCTCACGAATAGCAAC
DAL81 ORF-3’UTR -F	GCTGAAACAACTACTCCTGCCAAT
DAL81 ORF-3’UTR-R	TTCACTCCAGAAATACTCCCCTTTTCAGCATCACTTACCGCTGCTATATG
C.d. ARG4 -F	CAATATGAGTAGAGGTGGCGGTTAacatttctgtaccgcaaatgtatcg
C.d. ARG4 -R	TAAATGCTAACTACTGTATATACTGagtaatgaaagcagtcaaagggctc
DAL81 ORF check-F	CCTAAATGGGAACGAGGATTACG
DAL81 ORF check-R	TAATTCTGGTGATGGTGGATTGC
1st round PCR AgNAT-TDH3-STP2(STP2*)-F	GACGTATTTATTTTACTGAATCCATCAAGAGTGTTTCAACAACCatcaagcttgcctcg	Construction of STP2 (STP2*) overexpressionstrains
1st round PCR AgNAT-TDH3- STP2-R	GGTTGTGGTTGTTTATTGTTATTGGATGTTATTGCTACTGACATatttgaattcaattg
1st round PCR AgNAT-TDH3-STP2*-R	TCTGTAGTATAATAAGTTGTGAAATTGCTCTTTTGTAAATCAGGCATatttgaattcaa
2nd round PCR AgNAT-TDH3-STP2(STP2*)-F	TCTTCCTTTACCCCAACTTGATCATACTTTATCTGACTTGATCAGACGTATTTATTTTA
2nd round PCR AgNAT-TDH3-STP2-R	AAGTTGAATTATTATTCACCACTTTTAGATGTGGTTGTGGTTGTGGTTGTGGTTGTTTA
2nd round PCR AgNAT-TDH3-STP2*-R	TTGAACAAATCACTGGTTTTAAAACATCTTGATGTAATGGTTTTTCTGTAGTATAATAA
1st round PCR AgNAT-TDH3-DAL81-F	TTATTCTTCATTTCGTTTATTTGAAAGGGTATTCTGCTACACTAatcaagcttgcctcg	Construction of DAL81 overexpression strains
1st round PCR AgNAT-TDH3-DAL81-R	GGGGTCCAATTTTGATCCATAAAATTTGGTGATTGATTATCCATatttgaattcaattg
2nd round PCR AgNAT-TDH3-DAL81-R	TACACTTTACTTCGTATATATACAATATATTATATTGGGGGTTATTATTCTTCATTTCG
2nd round PCR AgNAT-TDH3-DAL8-R	AATCCAAATTGGCCAAATAAGAAGCTGTTTGTGGTAACATATGTGGGGTCCAATTTTGA
ACT1-qPCR-F	GTGGTACTACCATGTTCCCAGG	qPCR
ACT1-qPCR-R	GATAGAACCACCAATCCAGACAGAG
ACS1-qPCR-F	CTGGTATCACACCAACTAAACCAG
ACS1-qPCR-R	CTCTAGTAATTGATGGCCAAGCTG
CAN2-qPCR-F	CCAAAGCTTACTCAAGATGGTGGT
CAN2-qPCR-R	CTTGGGCTAACCCGTAAAGAATAC
HGT2-qPCR-F	TGTGTTACTGCCCCAGCTTTATAC
HGT2-qPCR-R	GACTGAGTCGTTACCACTATCTGG
STP2-qPCR-F	CTAGTTGTGATGCCGAGTTTAGAG
STP2-qPCR-R	TATCTCTTCTGGAAAACCCTCCAC
DAL81-qPCR-F	AATGTCACATTCACCGGCAG
DAL81-qPCR-R	TGGTGATTCTCTAATTGGCGC
GDH2-qPCR-F	CCTGAGACCAAAGCCAAACC
GDH2-qPCR-R	TGGCCAACTCATCTCCCAAT
PCK1-qPCR-F	AGACACAATGCTCCACCTCC
PCK1-qPCR-R	GTTTATTCACTGGACCCCACC
PUT1-qPCR-F	GCTCTTGTTTATCGTATTTATTGTGG
PUT1-qPCR-R	TCAACATTATCATTACCATCACAAGC
PUT1-ChIP qPCR-F	AGTTCCTCATACTGTAGCCATGA	ChIP- qPCR
PUT1-ChIP qPCR-R	GCATCTTTAGCAAATCCTGTTGG
GDH2-ChIP qPCR-F	CAGAACCACATCAAACACTTCA
GDH2-ChIP qPCR-R	GCTTCAGATTCAATGAGCGATTC
PCK1-ChIP qPCR-F	CCATAACATTTGGTGGGGTCC
PCK1-ChIP qPCR-R	GCATAAGCGTCAACAACAAACA
pGADT7-Dal81-F	GAGGCCAGTGAATTCCACCCGGGATGGATAATCAATCACCAAATTTTATG	Construction of pGADT7-Dal81plasmid
pGADT7-Dal81-R	GCAGCTCGAGCTCGATGGATCCTCATTTGGTTAGTTCGGGT
pGBKT7-Stp2-F	TGGAGGCCGAATTCCCGGGGATCATGTCAGTAGCAATAACATCC	Construction of pGBKT7-Stp2 plasmid
pGBKT7-Stp2-R	GGTTATGCTAGTTATGCGGCCGCTGCAGTCAGAAATACATTGATGGTTG
Promoter-DAL81 ORF-13x Myc-F	tgcggtacagaaatgtgtttaaacGAAGGAGAAGGAGAAGAAGCAGA	Construction of DAL81-13xMyc or DAL81m21-13xMyc addback plasmid
Promoter-DAL81 ORF-13x Myc-R	TCCAGAAATACTCCCCTTTTCgtttaaaccgcgaattcactagtgattga
Promoter-DAL81 mutant 2 ORF-R	TGAACAGCggcggcTTTTGGTCGTTTTAATATTTCCAACA	Construction of DAL81m2-13xMyc addback plasmid
DAL81 mutant 2 ORF-13x Myc-F	AAAAgccgccGCTGTTCAAGCAGGATTATTATTGTT
Specific qPCR for SN250 strain-F	TGAGCACCATAAGGACGTTC	Specific qPCR for C. albicans strains
Specific qPCR for SN250 strain-R	CGAGCATGAGGTTGTGATTTTG
Specific qPCR for stp2D/D strain-R	CCTTCAAGAACAAAAGAAACGG
Specific qPCR for dal81D/D strain-R	AATGATGGGGGAGATAAAATAGT
Specific qPCR for Dal81 comp. strain-F	gttcatatgcaacttatttcactgaag
Specific qPCR for Dal81 comp. strain-R	cacgatcaataccgtagggatg	Construction of dal81Δ/Δ M1 mutant strain
1st round PCR 5'DAL81-SAT1–FLP-3'DAL81-F	atcataatgaacaatctttaaataataataataataataacaccggtaccgggcccccc
1st round PCR 5'DAL81-SAT1–FLP-3'DAL81-R	attatacatagttatacatttaaaaaaattgaaatattacacatagaactagtggatct
2nd round PCR 5'DAL81-SAT1–FLP-3'DAL81-F	gaatagtaatattaataaaaactcccctaatgtctcctcccctcatcataatgaacaat
2nd round PCR 5'DAL81-SAT1–FLP-3'DAL81-R	tgattccctttgattaaaaaatgatgggggagataaaatagtttattatacatagttat
F, forward; R, reverse; *, a truncated processed form of STP2.
