# Supplementary material for: Coordinated regulation of pH alkalinization by two transcription factors promotes fungal commensalism and pathogenicity
Source: Nat Commun. 2025 Aug 22;16:7855. doi: 10.1038/s41467-025-62953-x (PMC12373999; doi:10.1038/s41467-025-62953-x)
Supplement: Supplementary file 13 — Source data [file 41467_2025_62953_MOESM13_ESM.xlsx]

## Sheet: Fig.1
Fig.1C				Fig.1D
				SC5314	dal81Δ/Δ M1
				1.0456	6.6134e-05
				1.20388	6.6134e-05
				0.794423	9.04133e-05
Fig.1F														Fig.1H
Time	WT			dal81Δ/Δ			stp2Δ/Δ			Da181 comp.				WT	dal8Δ/Δ	stp2Δ/Δ	dal81Δ/Δstp2Δ/Δ	DAL81 comp.
0	4	4.06	4.03	4	4.03	4.02	4.04	4.03	4.02	4	4.02	4.05		1694.98	803.242	1044.57	668.217	1980.81
2	4.17	4.3	4.42	3.74	3.79	3.82	3.71	3.86	3.7	3.96	3.97	3.99		1345.67	956.72	919.011	784.799	1415.29
4	3.81	3.86	3.92	3.86	3.83	3.95	3.96	3.85	3.99	3.88	3.94	3.84		1377.65	739.882	1056.09	701.135	837.649
6	3.58	3.63	3.71	3.72	3.73	3.4	3.95	4	4.05	3.67	3.69	3.77
8	4.66	4.8	4.74	3.5	3.55	3.52	3.53	3.61	3.65	3.7	3.64	3.67
10	5.1	5.35	5.19	3.8	3.89	3.84	3.96	3.88	4.09	4.28	4.22	4.26
12	5.47	5.61	5.5	3.85	3.88	3.97	3.83	3.81	3.95	4.88	4.6	4.82
23	6.4	6.49	6.52	4.71	4.79	4.73	4.34	4.5	4.56	5.95	5.66	5.93
24	6.5	6.73	6.8	4.77	4.88	4.76	4.42	4.52	4.58	5.9	6.01	6.3
Fig.1I				Fig.1J					Fig.1K					Fig.1L
WT	dal81Δ/Δ	stp2Δ/Δ		WT	dal81Δ/Δ	stp2Δ/Δ	DAL81 comp.		WT	dal81Δ/Δ	stp2Δ/Δ	DAL81 comp.		WT	dal81Δ/Δ	stp2Δ/Δ
29.1667	57.6271	57.1429		62.5281	3.13979	41.5547	64.9755		60.6061	36.3158	35.2941	61.8182		66.9474	30.1741	31.2849
21.6216	37.931	46.9697		57.9075	5.53649	40.4027	60.4814		51.087	30.0546	48.913	72.4138		56.8421	37.1373	20.1117
26.3889	43.5484	65.9091		60.196	4.02836	35.8387	62.2648		63.5294	43.6364	41.3462	94.8148		59.3684	34.8162	14.5251
Fig.1M
WT	dal81Δ/Δ	stp2Δ/Δ
54.1936	30.0752	34.8668
48.3871	24.812	29.0557
58.0645	29.3233	30.5085

## Sheet: Fig.2
Fig.2A
	SD			YNB+1%CAA
STP2	1.14411	0.874646	0.981247	290.005	271.445	400.731
DAL81	1.51622	1.10118	0.382601	472.611	497.029	553.94
Fig.2B
Time	WT			dal81Δ/Δ			stp2Δ/Δ			dal81Δ/Δstp2Δ/Δ			Da181 comp.
0	4.3	4.3	4.32	4.3	4.31	4.29	4.3	4.29	4.3	4.3	4.3	4.31	4.3	4.31	4.31
2	4.58	4.49	4.62	4.5	4.41	4.63	4.48	4.41	4.37	4.48	4.4	4.39	4.46	4.39	4.48
4	4.91	4.8	5.03	4.54	4.47	4.58	4.49	4.46	4.41	4.5	4.48	4.49	4.72	4.8	4.83
6	6.13	5.91	6.25	4.52	4.48	4.69	4.57	4.5	4.55	4.54	4.5	4.51	5.57	5.4	5.64
24	7.83	7.7	7.92	6.32	6.17	6.4	5.84	5.73	5.91	4.8	4.55	4.7	7.89	7.94	7.76
Fig.2C
Time	WT			dal81Δ/Δ			stp2Δ/Δ			dal81Δ/Δstp2Δ/Δ			Da181 comp.
0	4.2	4.2	4.2	4.2	4.2	4.2	4.2	4.21	4.2	4.2	4.2	4.2	4.2	4.2	4.2
2	4.53	4.21	4.4	4.33	4.37	4.41	4.35	4.29	4.31	4.28	4.3	4.22	4.42	4.5	4.4
24	7.41	7.3	7.5	7.15	6.91	6.8	5.96	5.88	5.94	5.64	5.41	5.31	7.55	7.43	7.5
32	7.65	7.51	7.71	7.28	7	7.2	6	5.9	6.14	5.73	5.6	5.75	7.72	7.64	7.39
48	7.83	7.7	7.92	7.49	7.42	7.44	6.34	6.2	6.38	5.84	5.7	5.57	7.58	7.28	7.66
56	7.84	7.7	7.95	7.47	7.35	7.3	6.37	6.1	6.41	5.83	5.66	5.72	7.5	7.65	7.59
Fig.2D
time	WT			dal81Δ/Δ			stp2Δ/Δ			dal81Δ/Δstp2Δ/Δ			Da181 comp.
0	4.5	4.5	4.51	4.5	4.49	4.5	4.5	4.5	4.5	4.5	4.5	4.5	4.5	4.5	4.5
24	4.82	4.73	4.64	4.55	4.5	4.59	4.94	4.8	5.23	4.58	4.52	4.59	6.61	6.43	6.49
32	5.1	5	5.4	4.57	4.53	4.6	5.29	5.14	5.38	4.61	4.56	4.7	7.02	6.94	7.3
48	6.57	6.49	6.68	4.85	4.7	4.95	6.36	6.2	6.44	5.01	4.98	5.32	7.63	7.45	7.76
56	7.31	7.22	7.57	5.09	4.92	5.12	7.33	7.15	7.5	5.18	5.11	5.42	7.98	7.74	8.2

## Sheet: Fig.3
Fig.3A				Fig.3C
WT	dal81Δ/Δ	DAL81 comp.		WT	stp2Δ/Δ	DAL81 comp.
1.00699	0.953533	0.795749		0.395388	0.699572	0.157771
1.0172	0.923248	0.751161		0.357382	0.618848	0.201599
0.799853	0.940293	0.623329		0.307614	0.668368	0.136991
Fig.3B
WT	dal81Δ/Δ	dal81Δ/Δ(STP2OE)	dal81Δ/Δ(STP2*OE)
1.14909	0.222718	1.133	1.133
0.870397	0.263136	0.772751	0.698956
0.980515	0.336723	1.08637	1.69875
Fig.3D
	WT	stp2Δ/Δ
	0.935469	0.771392
	0.994731	1.01446
	1.06346	2.64327

## Sheet: Fig.4
Fig.4A
	C			C+N			N
WT	2	3	1	98	96	98	0	1	1
dal81Δ/Δ	0	1	2	68	77	72	26	22	26
STP2*OE	0	0	1	100	100	98	0	0	1
dal81Δ/Δ(STP2*OE)	0	0	0	64	75	52	36	25	26
Fig.4C					Fig.4D

## Sheet: Fig.5
Fig.5C										Fig.5H
										time (hh:mm:ss)	WT			DAL81/dal81Δ			DAL81m21/dal81Δ
										0:14:10	0.177	0.175	0.173	0.173	0.17	0.167	0.166	0.167	0.171
										0:29:10	0.196	0.187	0.188	0.188	0.186	0.176	0.178	0.179	0.185
										0:44:10	0.212	0.204	0.203	0.205	0.204	0.189	0.193	0.194	0.205
										0:59:10	0.227	0.216	0.218	0.221	0.221	0.205	0.207	0.21	0.221
										1:14:10	0.247	0.24	0.238	0.238	0.236	0.225	0.219	0.225	0.235
										1:29:10	0.277	0.265	0.271	0.257	0.254	0.244	0.235	0.241	0.254
										1:44:10	0.321	0.302	0.313	0.286	0.287	0.269	0.257	0.263	0.279
										1:59:10	0.367	0.344	0.355	0.328	0.327	0.305	0.286	0.295	0.314
										2:14:10	0.41	0.385	0.398	0.371	0.369	0.344	0.321	0.332	0.352
										2:29:10	0.45	0.423	0.435	0.41	0.407	0.382	0.354	0.367	0.388
										2:44:10	0.484	0.451	0.469	0.442	0.441	0.413	0.383	0.399	0.418
										2:59:10	0.513	0.473	0.497	0.473	0.47	0.443	0.409	0.427	0.445
										3:14:10	0.536	0.489	0.518	0.498	0.494	0.468	0.431	0.451	0.467
Fig.5D					Fig. 5E					3:29:10	0.553	0.506	0.535	0.514	0.513	0.488	0.449	0.471	0.486
WT	dal81Δ/Δ	DAL81/dal81Δ	DAL81m2/dal81Δ		WT	dal81Δ/Δ	DAL81/dal81Δ	DAL81m2/dal81Δ		3:44:10	0.567	0.516	0.547	0.53	0.529	0.504	0.462	0.484	0.5
1	0.0143901	0.568409	0.570616		1	0.209679	0.438127	0.339597		3:59:10	0.577	0.525	0.556	0.541	0.54	0.517	0.473	0.496	0.512
1	0.00735489	0.412135	0.498577		1	0.166472	0.369107	0.329651		4:14:10	0.585	0.534	0.564	0.548	0.548	0.526	0.483	0.504	0.522
1	0.0162277	1.15015	1.22728		1	0.59704	1.70689	1.18566		4:29:10	0.591	0.541	0.57	0.553	0.554	0.535	0.49	0.511	0.528
										4:44:10	0.594	0.545	0.574	0.556	0.558	0.54	0.495	0.515	0.534
Fig.5G										4:59:10	0.598	0.551	0.578	0.561	0.561	0.544	0.5	0.519	0.538
										5:14:10	0.602	0.554	0.581	0.566	0.563	0.546	0.505	0.522	0.544
										5:29:10	0.606	0.559	0.584	0.569	0.566	0.55	0.508	0.524	0.548
										5:44:10	0.608	0.561	0.586	0.57	0.569	0.552	0.513	0.527	0.553
										5:59:10	0.611	0.563	0.589	0.573	0.572	0.555	0.515	0.529	0.556
										6:14:10	0.613	0.567	0.592	0.575	0.574	0.556	0.519	0.532	0.561
										6:29:10	0.616	0.569	0.594	0.577	0.575	0.557	0.522	0.535	0.564
										6:44:10	0.618	0.572	0.596	0.579	0.577	0.559	0.524	0.538	0.568
										6:59:10	0.621	0.575	0.598	0.582	0.578	0.561	0.527	0.538	0.572
										7:14:10	0.623	0.578	0.6	0.584	0.58	0.563	0.531	0.541	0.575
										7:29:10	0.626	0.58	0.602	0.587	0.582	0.564	0.531	0.542	0.576
										7:44:10	0.628	0.582	0.603	0.588	0.583	0.566	0.535	0.544	0.58
										7:59:10	0.631	0.585	0.606	0.59	0.584	0.567	0.538	0.545	0.582
										8:14:10	0.634	0.587	0.608	0.593	0.586	0.569	0.539	0.547	0.584
										8:29:10	0.636	0.589	0.609	0.595	0.587	0.57	0.541	0.549	0.587
										8:44:10	0.638	0.591	0.612	0.597	0.589	0.572	0.543	0.55	0.588
										8:59:10	0.64	0.593	0.613	0.599	0.59	0.572	0.545	0.552	0.591
										9:14:10	0.643	0.596	0.616	0.602	0.592	0.574	0.547	0.554	0.592
										9:29:10	0.646	0.598	0.617	0.604	0.593	0.575	0.549	0.555	0.594
										9:44:10	0.647	0.599	0.62	0.606	0.593	0.575	0.549	0.556	0.597
										9:59:10	0.65	0.601	0.622	0.607	0.594	0.578	0.551	0.558	0.598
										10:14:10	0.652	0.604	0.623	0.609	0.596	0.578	0.553	0.56	0.6
										10:29:10	0.654	0.606	0.625	0.611	0.597	0.579	0.554	0.561	0.602
										10:44:10	0.655	0.609	0.626	0.613	0.598	0.581	0.555	0.561	0.603
										10:59:10	0.657	0.609	0.628	0.614	0.599	0.581	0.557	0.562	0.605
										11:14:10	0.659	0.612	0.629	0.616	0.6	0.583	0.559	0.564	0.606
										11:29:10	0.661	0.614	0.631	0.619	0.601	0.583	0.56	0.565	0.608
										11:44:10	0.663	0.616	0.632	0.619	0.602	0.584	0.562	0.566	0.61
										11:59:10	0.665	0.618	0.634	0.621	0.603	0.585	0.563	0.568	0.612
										12:14:10	0.666	0.62	0.635	0.622	0.604	0.586	0.565	0.569	0.613
										12:29:10	0.668	0.622	0.637	0.624	0.605	0.587	0.566	0.57	0.614
										12:44:10	0.67	0.624	0.639	0.625	0.606	0.588	0.567	0.57	0.615
										12:59:10	0.671	0.626	0.64	0.627	0.608	0.589	0.567	0.571	0.616
										13:14:10	0.674	0.629	0.642	0.629	0.608	0.591	0.569	0.573	0.618
										13:29:10	0.675	0.63	0.644	0.629	0.61	0.592	0.571	0.573	0.619
										13:44:10	0.676	0.633	0.646	0.63	0.611	0.593	0.571	0.574	0.62
										13:59:10	0.678	0.634	0.647	0.632	0.612	0.594	0.573	0.576	0.621
										14:14:10	0.68	0.637	0.649	0.633	0.613	0.594	0.575	0.577	0.621
										14:29:10	0.681	0.64	0.651	0.636	0.614	0.596	0.576	0.578	0.623
										14:44:10	0.683	0.641	0.652	0.637	0.615	0.596	0.577	0.579	0.624
										14:59:10	0.685	0.643	0.654	0.638	0.616	0.598	0.578	0.579	0.625
										15:14:10	0.687	0.646	0.655	0.641	0.618	0.598	0.579	0.58	0.625
										15:29:10	0.689	0.647	0.657	0.642	0.618	0.599	0.58	0.581	0.626
										15:44:10	0.69	0.649	0.659	0.644	0.62	0.601	0.581	0.582	0.628
										15:59:10	0.692	0.651	0.661	0.644	0.62	0.602	0.582	0.583	0.628
										16:14:10	0.693	0.654	0.663	0.645	0.621	0.603	0.583	0.584	0.63
										16:29:10	0.695	0.656	0.664	0.646	0.624	0.604	0.584	0.585	0.63
										16:44:10	0.698	0.659	0.667	0.648	0.624	0.605	0.584	0.585	0.631
										16:59:10	0.7	0.661	0.669	0.65	0.624	0.606	0.584	0.586	0.632
										17:14:10	0.702	0.664	0.67	0.652	0.627	0.605	0.585	0.587	0.633
										17:29:10	0.703	0.664	0.672	0.652	0.627	0.607	0.586	0.588	0.633
										17:44:10	0.705	0.666	0.674	0.653	0.628	0.609	0.588	0.588	0.634
										17:59:10	0.706	0.669	0.675	0.655	0.629	0.61	0.588	0.588	0.635
										18:14:10	0.708	0.671	0.677	0.656	0.63	0.611	0.589	0.589	0.636
										18:29:10	0.71	0.672	0.679	0.658	0.631	0.611	0.591	0.589	0.637
										18:44:10	0.712	0.676	0.682	0.659	0.632	0.612	0.59	0.591	0.638
										18:59:10	0.713	0.675	0.683	0.66	0.634	0.614	0.591	0.591	0.638
										19:14:10	0.715	0.677	0.684	0.661	0.635	0.614	0.593	0.593	0.639
										19:29:10	0.716	0.68	0.686	0.661	0.635	0.615	0.594	0.593	0.641
										19:44:10	0.718	0.682	0.687	0.662	0.637	0.616	0.594	0.594	0.642
										19:59:10	0.719	0.684	0.689	0.663	0.639	0.617	0.595	0.594	0.643
										20:14:10	0.72	0.685	0.691	0.664	0.639	0.618	0.597	0.595	0.644
										20:29:10	0.721	0.685	0.693	0.665	0.641	0.62	0.597	0.596	0.644
										20:44:10	0.722	0.688	0.694	0.666	0.642	0.621	0.597	0.596	0.645
										20:59:10	0.723	0.689	0.696	0.667	0.642	0.622	0.598	0.597	0.646
										21:14:10	0.724	0.691	0.697	0.669	0.644	0.623	0.599	0.598	0.647
										21:29:10	0.726	0.692	0.698	0.67	0.646	0.624	0.6	0.599	0.647
										21:44:10	0.728	0.694	0.7	0.671	0.646	0.625	0.601	0.6	0.649
										21:59:10	0.728	0.695	0.701	0.673	0.648	0.626	0.602	0.601	0.65
										22:14:10	0.729	0.697	0.703	0.675	0.648	0.627	0.603	0.602	0.651
										22:29:10	0.731	0.698	0.705	0.675	0.649	0.628	0.603	0.603	0.652
										22:44:10	0.732	0.7	0.706	0.676	0.651	0.629	0.603	0.604	0.652
										22:59:10	0.733	0.701	0.708	0.677	0.651	0.63	0.604	0.605	0.653
										23:14:10	0.733	0.702	0.707	0.678	0.653	0.631	0.604	0.605	0.655
										23:29:10	0.735	0.703	0.709	0.679	0.653	0.633	0.607	0.607	0.656
										23:44:10	0.735	0.704	0.71	0.681	0.655	0.634	0.607	0.607	0.656
										23:59:10	0.737	0.707	0.713	0.683	0.656	0.635	0.607	0.608	0.657
										24:14:10	0.738	0.708	0.714	0.683	0.657	0.636	0.609	0.608	0.659
										24:29:10	0.739	0.708	0.715	0.684	0.659	0.637	0.609	0.61	0.659
										24:44:10	0.741	0.709	0.716	0.685	0.66	0.638	0.61	0.611	0.66
										24:59:10	0.741	0.711	0.716	0.687	0.661	0.64	0.611	0.612	0.661
										25:14:10	0.741	0.713	0.719	0.688	0.662	0.641	0.611	0.612	0.662
										25:29:10	0.742	0.713	0.718	0.688	0.663	0.641	0.612	0.613	0.663
										25:44:10	0.742	0.715	0.721	0.69	0.664	0.643	0.613	0.613	0.663
										25:59:10	0.743	0.718	0.722	0.692	0.665	0.644	0.614	0.613	0.664
										26:14:10	0.744	0.717	0.723	0.692	0.667	0.645	0.614	0.614	0.665
										26:29:10	0.745	0.717	0.723	0.693	0.668	0.645	0.615	0.615	0.667
										26:44:10	0.746	0.72	0.723	0.695	0.669	0.646	0.615	0.615	0.667
										26:59:10	0.746	0.719	0.725	0.696	0.669	0.647	0.616	0.616	0.668
										27:14:10	0.748	0.72	0.727	0.697	0.671	0.649	0.616	0.617	0.669
										27:29:10	0.747	0.721	0.727	0.697	0.671	0.649	0.617	0.618	0.67
										27:44:10	0.748	0.723	0.728	0.699	0.673	0.65	0.618	0.619	0.669
										27:59:10	0.748	0.723	0.729	0.701	0.674	0.651	0.618	0.619	0.67
										28:14:10	0.749	0.725	0.73	0.702	0.676	0.652	0.618	0.62	0.672
										28:29:10	0.749	0.725	0.73	0.702	0.676	0.653	0.62	0.62	0.672
										28:44:10	0.75	0.726	0.731	0.705	0.677	0.654	0.621	0.621	0.674
										28:59:10	0.75	0.727	0.731	0.705	0.678	0.656	0.622	0.622	0.675
										29:14:10	0.75	0.727	0.733	0.704	0.68	0.656	0.622	0.624	0.675
										29:29:10	0.75	0.729	0.733	0.706	0.681	0.658	0.623	0.624	0.676
										29:44:10	0.751	0.729	0.735	0.707	0.682	0.659	0.624	0.625	0.676
										29:59:10	0.751	0.729	0.735	0.709	0.684	0.659	0.625	0.625	0.677
										30:14:10	0.752	0.73	0.735	0.71	0.684	0.66	0.625	0.626	0.678
										30:29:10	0.753	0.732	0.736	0.71	0.685	0.661	0.626	0.627	0.679
										30:44:10	0.753	0.732	0.736	0.712	0.687	0.663	0.627	0.628	0.679
										30:59:10	0.753	0.732	0.737	0.711	0.688	0.664	0.627	0.628	0.68
										31:14:10	0.754	0.733	0.738	0.713	0.689	0.665	0.628	0.63	0.68
										31:29:10	0.755	0.734	0.738	0.715	0.69	0.666	0.63	0.631	0.682
										31:44:10	0.754	0.733	0.738	0.715	0.691	0.667	0.631	0.631	0.682
										31:59:10	0.755	0.735	0.739	0.716	0.692	0.668	0.631	0.632	0.683
										32:14:10	0.755	0.735	0.739	0.718	0.693	0.669	0.632	0.633	0.683
										32:29:10	0.756	0.735	0.739	0.718	0.695	0.67	0.634	0.634	0.683
										32:44:10	0.757	0.736	0.741	0.719	0.696	0.67	0.634	0.634	0.684
										32:59:10	0.757	0.737	0.74	0.721	0.696	0.672	0.635	0.635	0.684
										33:14:10	0.757	0.738	0.741	0.721	0.697	0.673	0.636	0.636	0.685
										33:29:10	0.757	0.738	0.742	0.722	0.698	0.674	0.636	0.637	0.685
										33:44:10	0.757	0.739	0.743	0.723	0.699	0.675	0.638	0.638	0.686
										33:59:10	0.757	0.739	0.742	0.725	0.7	0.677	0.638	0.638	0.687
										34:14:10	0.757	0.741	0.742	0.724	0.702	0.676	0.639	0.639	0.687
										34:29:10	0.759	0.741	0.743	0.725	0.702	0.677	0.64	0.64	0.688
										34:44:10	0.758	0.741	0.744	0.726	0.703	0.679	0.641	0.641	0.687
										34:59:10	0.757	0.741	0.743	0.726	0.705	0.68	0.642	0.641	0.688
										35:14:10	0.757	0.741	0.744	0.728	0.706	0.68	0.643	0.643	0.688
										35:29:10	0.757	0.743	0.744	0.728	0.706	0.682	0.643	0.643	0.69
										35:44:10	0.755	0.742	0.744	0.729	0.708	0.683	0.644	0.644	0.69
										35:59:10	0.754	0.743	0.744	0.728	0.709	0.684	0.645	0.645	0.691
										36:14:10	0.753	0.744	0.745	0.73	0.709	0.684	0.647	0.646	0.691
										36:29:10	0.752	0.744	0.745	0.731	0.71	0.685	0.647	0.647	0.691
										36:44:10	0.752	0.745	0.745	0.731	0.71	0.686	0.648	0.647	0.692
										36:59:10	0.752	0.743	0.746	0.732	0.711	0.686	0.649	0.648	0.693
										37:14:10	0.751	0.746	0.745	0.733	0.713	0.688	0.65	0.648	0.693
										37:29:10	0.75	0.745	0.746	0.733	0.713	0.689	0.651	0.649	0.692
										37:44:10	0.75	0.746	0.746	0.733	0.713	0.69	0.652	0.649	0.694
										37:59:10	0.751	0.745	0.746	0.734	0.714	0.69	0.653	0.65	0.694
										38:14:10	0.75	0.746	0.746	0.735	0.715	0.691	0.653	0.651	0.694
										38:29:10	0.749	0.747	0.747	0.735	0.715	0.692	0.655	0.651	0.695
										38:44:10	0.748	0.746	0.747	0.736	0.717	0.692	0.655	0.651	0.695
										38:59:10	0.748	0.746	0.747	0.736	0.718	0.694	0.656	0.652	0.696
										39:14:10	0.748	0.747	0.747	0.736	0.718	0.693	0.656	0.652	0.696
										39:29:10	0.747	0.745	0.747	0.737	0.719	0.694	0.659	0.652	0.697
										39:44:10	0.747	0.745	0.748	0.739	0.72	0.695	0.659	0.653	0.697
										39:59:10	0.746	0.743	0.748	0.738	0.721	0.695	0.66	0.653	0.698
										40:14:10	0.746	0.743	0.748	0.737	0.721	0.696	0.661	0.653	0.698
										40:29:10	0.747	0.743	0.749	0.739	0.722	0.698	0.662	0.653	0.699
										40:44:10	0.746	0.741	0.748	0.739	0.723	0.697	0.662	0.653	0.699
										40:59:10	0.745	0.741	0.748	0.738	0.723	0.699	0.664	0.654	0.7
										41:14:10	0.745	0.739	0.748	0.738	0.724	0.699	0.664	0.654	0.701
										41:29:10	0.743	0.737	0.749	0.74	0.723	0.7	0.666	0.655	0.701
										41:44:10	0.743	0.737	0.748	0.739	0.726	0.701	0.665	0.656	0.703
										41:59:10	0.742	0.736	0.748	0.737	0.726	0.701	0.666	0.656	0.703
										42:14:10	0.742	0.736	0.749	0.738	0.726	0.703	0.667	0.657	0.704
										42:29:10	0.742	0.735	0.749	0.738	0.727	0.702	0.668	0.657	0.704
										42:44:10	0.741	0.735	0.749	0.739	0.727	0.704	0.668	0.658	0.705
										42:59:10	0.741	0.735	0.748	0.738	0.728	0.704	0.669	0.658	0.706
										43:14:10	0.74	0.735	0.75	0.738	0.728	0.706	0.67	0.659	0.707
										43:29:10	0.74	0.733	0.749	0.738	0.73	0.705	0.67	0.659	0.707
										43:44:10	0.74	0.733	0.75	0.739	0.73	0.707	0.671	0.66	0.708
										43:59:10	0.74	0.733	0.75	0.738	0.73	0.707	0.671	0.66	0.709
										44:14:10	0.738	0.733	0.75	0.738	0.731	0.707	0.672	0.66	0.709
										44:29:10	0.738	0.733	0.751	0.738	0.732	0.71	0.673	0.661	0.709
										44:44:10	0.737	0.732	0.75	0.737	0.732	0.71	0.673	0.661	0.71
										44:59:10	0.737	0.732	0.75	0.737	0.734	0.71	0.674	0.662	0.71
										45:14:10	0.737	0.731	0.751	0.737	0.734	0.711	0.674	0.661	0.711
										45:29:10	0.736	0.732	0.751	0.736	0.735	0.711	0.675	0.662	0.711
										45:44:10	0.735	0.731	0.75	0.736	0.735	0.712	0.675	0.662	0.711
										45:59:10	0.734	0.729	0.75	0.736	0.736	0.712	0.676	0.663	0.711
										46:14:10	0.734	0.73	0.748	0.735	0.736	0.713	0.676	0.663	0.712
										46:29:10	0.734	0.729	0.746	0.736	0.737	0.713	0.676	0.663	0.712
										46:44:10	0.732	0.729	0.747	0.735	0.737	0.713	0.677	0.664	0.713
										46:59:10	0.732	0.728	0.745	0.734	0.738	0.714	0.677	0.664	0.713
										47:14:10	0.732	0.728	0.744	0.735	0.737	0.715	0.678	0.664	0.714
										47:29:10	0.731	0.727	0.744	0.735	0.738	0.716	0.679	0.664	0.714
										47:44:10	0.731	0.727	0.743	0.735	0.74	0.716	0.679	0.665	0.714
										47:59:10	0.73	0.727	0.742	0.734	0.739	0.717	0.679	0.665	0.714
										48:14:10	0.73	0.725	0.742	0.734	0.739	0.718	0.681	0.666	0.715

## Sheet: Fig.7
Fig.7E
	WT			Dal81-Myc			Dal81-Myc (stp2Δ/Δ)
PUT1	0.679174	1.22426	1.20267	38.3631	33.6287	33.9935	4.21173	5.723	5.11205
GDH2	0.707787	1.20628	1.17125	121.77	102.724	106.121	12.628	16.8192	15.4884
PCK1	0.70551	1.12903	1.25542	74.9281	73.1774	68.4324	5.64367	6.82951	7.02038
Fig.7F
	WT			Stp2-HA			Stp2-HA (dal81Δ/Δ)
PUT1	0.788864	0.993383	1.27609	147.526	130.391	128.725	2.61165	4.50612	3.65853
GDH2	1.10996	0.933626	0.96498	157.479	146.676	153.609	7.0736	17.0238	10.0547
PCK1	1.10078	0.935325	0.971265	94.9032	90.5283	92.4557	3.76998	5.88257	6.35203
Fig.7G
	WT			DAL81/dal81Δ			DAL81m21/dal81Δ
PUT1	0.940358	1.20896	0.879618	2.55825	1.6931	2.01946	0.851659	0.971787	0.78721
GDH2	0.947835	1.06569	0.990006	3.03927	1.77102	2.19586	0.818664	0.848416	0.722347
PCK1	0.952574	1.10849	0.947039	3.46009	1.9352	2.36747	0.909679	0.950558	0.725639
Fig.7H					Fig.7I
WT	dal81Δ/Δ	stp2Δ/Δ	dal81Δ/Δstp2Δ/Δ		WT	dal81Δ/Δ	stp2Δ/Δ	dal81Δ/Δstp2Δ/Δ
1.15826	0.272807	0.084806	0.054374		1.26376	0.160377	0.128255	0.086955
0.863367	0.355957	0.12956	0.062894		0.891288	0.139583	0.288001	0.098045
1.00484	0.295241	0.105217	0.05894		1.17193	0.119119	0.194193	0.091538
Fig.7J					Fig.7K
WT	dal81Δ/Δ	stp2Δ/Δ	dal81Δ/Δstp2Δ/Δ		WT	DAL81/dal81Δ	DAL81m5/dal81Δ
1.28513	0.552624	0.406123	0.097274		1.11	0.5061	0.3428
0.878129	0.504168	0.471929	0.155483		0.98	0.5389	0.391
1.05374	0.529632	0.440246	0.128812		0.92	0.5053	0.3573
Fig.7L					Fig.7M
WT	DAL81/dal81Δ	DAL81m21/dal81Δ			WT	DAL81/dal81Δ	DAL81m21/dal81Δ
1.1	0.5245	0.3192			1.18	0.9501	1.6965
0.98	0.5575	0.361			0.9	0.9179	0.5928
0.93	0.4961	0.2859			0.94	0.9978	0.938

## Sheet: Fig.8
Fig.8A
Day	WT								stp2Δ/Δ								dal81Δ/Δ								DAL81 comp.
3	6.26405	6.12387	6.50382	6.65244	5.66532	6.7931	6.26038	6.71321	4.11563	3.88606	3.76465	3.72816	3.47108	3.77728	4.17392	3.55752	3.82774	3.52713	3.92263	3.6073	3.63639	3.71067	3.71897	3.7133	6.30103	5.61828	5.91557	6.4347	6.2514	6.16471	6.68674	6.30872
5	6.14181	4.82681	6.49167	6.54975	6.29764	5.77568	5.97652	6.12925	2.50071	2.23444	2.25319	2.31575	2.12205	2.53511	2.05716	2.4223	3.76615	4.0422	2.60907	2.58503	2.58467	2.58028	2.68074	3.70439	6.89492	6.21602	6.4385	6.43339	6.81217	7.28073	6.66731	6.88492
8	6.2769	6.96379	6.27115	6.81858	6.34071	6.49392	6.40354	6.74329	2.25794	2.29243	2.14267	2.85387	2.13549	2.4318	1.64975	2.35099	2.75779	2.87091	2.92372	2.92837	2.8288	2.82691	2.77169	2.77294	6.43032	6.68419	6.0229	6.17825	6.22997	5.96373	6.39249	6.22169
Fig.8B					Fig.8C
WT	dal81Δ/Δ	stp2Δ/Δ	dal81Δ/Δstp2Δ/Δ		WT_Day3	dal81Δ/Δ_Day3	WT_Day5	dal81Δ/Δ_Day5	WT_Day8	dal81Δ/Δ_Day8	WT_Day3	DAL81 comp._Day3	WT_Day5	DAL81 comp._Day5	WT_Day8	DAL81 comp._Day8	WT_Day3	stp2Δ/Δ_Day3	WT_Day5	stp2Δ/Δ_Day5	WT_Day8	stp2Δ/Δ_Day8
12.0047	0.708955	0.070093	0		0.23747	-17.702	0.84272	-10.895	0.84276	-11.069	-0.7431	0.32801	-0.0728273	0.0916647	0.331824	-0.609574	6.62553	-9.7875	2.44235	-14.2855	2.4424	-17.0277
8.24324	2.08451	0.115385	0		0.23746	-14.885	0.83913	-7.3444	0.83603	-6.5095	-1.0118	0.40017	-0.342584	0.358025	0.720695	-2.8728	1.94068	-0.0425	2.44233	-13.7243	2.44235	-14.2185
16.4928	2.55965	0.747331	0		0.23738	-11.183	0.36377	-0.6467	0.82155	-4.9025	-0.1092	0.0652	0.404878	-0.815339	0.568809	-1.49019	5.7165	-9.7026	2.44236	-14.4809	2.44234	-13.9005
15.4651	0.452532	2.01053	0		0.23732	-10.527	0.84205	-9.3101	0.84288	-11.768	-1.7583	0.53277	0.493304	-1.13051	0.773002	-4.17299	5.64243	-1.0008	2.44235	-14.1143	2.44237	-14.6737
20.766	0.860606	0.006309	0		0.23747	-17.676	0.84298	-13.075	0.84211	-9.3882	-6.6071	0.70279	0.0271646	-0.0370126	0.560446	-1.44461	6.62597	-10.253	2.4423	-13.3562	2.44238	-15.1222
15	6.3522	2.35407	0		0.23747	-16.655	0.84196	-9.1784	0.83974	-7.5879	-1.4916	0.4943	0.384496	-0.753836	0.657124	-2.11287	6.62705	-13.812	2.44234	-14.0592	2.44235	-14.3274
6.70732	0.496644	0.97048	0		0.23745	-13.794	0.83016	-9.1172	0.83755	-7.5479	0.37375	-0.2996	0.546962	-1.37455	0.715623	-2.79358	6.62707	-14.13	2.44238	-14.2855	2.44237	-14.6535
1.63044	2.06025	2.81739	0		0.21835	-3.5269	0.83272	-7.3114	0.83296	-7.5492	-8.1825	0.70662	0.520022	-1.24574	0.558868	-1.4362	6.62677	-11.893	2.44238	-14.1893	2.44232	-14.6825
Fig.8D							Fig.8E					Fig.8F
Mice	Day	WT	dal81Δ/Δ	DAL81 comp.	stp2Δ/Δ		Mice	Day	WT	dal81Δ/Δstp2Δ/Δ		Mice	Day	DAL81/dal81Δ	DAL81m21/dal81Δ
#1	9	1					#1	6	1			#1	6	1
#2	5	1					#2	4	1			#2	6	1
#3	3	1					#3	6	1			#3	10	1
#4	7	1					#4	6	1			#4	18	1
#5	4	1					#5	6	1			#5	22	1
#6	6	1					#6	4	1			#6	12	1
#7	3	1					#7	6	1			#7	26	0
#8	2	1					#8	6	1			#8	26	1
#9	4	1					#1	30		0		#1	26		0
#10	3	1					#2	30		0		#2	26		0
#11	3	1					#3	30		0		#3	26		0
#12	4	1					#4	30		0		#4	6		1
#1	21				0		#5	30		0		#5	26		0
#2	21				0		#6	30		0		#6	26		0
#3	21				0		#7	30		0		#7	2		1
#4	21				0		#8	30		0		#8	26		0
#5	21				0
#6	21				0
#7	21				0
#8	21				0
#9	6				1
#10	21				0
#11	21				0
#12	21				0
#1	21		0
#2	11		1
#3	21		0
#4	11		1
#5	21		0
#6	21		0
#7	5		1
#8	21		0
#9	21		0
#10	21		0
#11	21		0
#12	14		1
#1	8			1
#2	21			1
#3	4			1
#4	6			1
#5	9			1
#6	6			1
#7	4			1
#8	2			1
#9	6			1
#10	4			1
#11	3			1
#12	5			1

## Sheet: Fig.S3
Fig.S3A														Fig.S3C
Time(hh:mm:ss)	WT			dal81Δ/Δ			stp2Δ/Δ			DAL81 comp.				Time(hh:mm:ss)	WT			dal81Δ/Δ			stp2Δ/Δ			DAL81 comp.
0:00:19	0.215	0.228	0.2	0.198	0.197	0.198	0.234	0.222	0.196	0.21	0.219	0.205		0:14:10	0.119	0.118	0.117	0.125	0.12	0.117	0.113	0.115	0.122	0.119	0.119	0.121
0:15:19	0.212	0.211	0.212	0.203	0.202	0.203	0.214	0.204	0.204	0.209	0.208	0.219		0:29:10	0.122	0.123	0.121	0.129	0.123	0.119	0.114	0.118	0.126	0.121	0.122	0.123
0:30:19	0.236	0.225	0.237	0.215	0.214	0.214	0.222	0.216	0.217	0.228	0.218	0.242		0:44:10	0.129	0.129	0.127	0.133	0.126	0.121	0.118	0.121	0.131	0.125	0.127	0.127
0:45:19	0.26	0.244	0.27	0.233	0.232	0.232	0.231	0.23	0.238	0.246	0.231	0.278		0:59:10	0.135	0.135	0.133	0.137	0.128	0.124	0.122	0.125	0.136	0.13	0.133	0.133
1:00:19	0.296	0.267	0.318	0.26	0.258	0.258	0.242	0.249	0.273	0.266	0.247	0.323		1:14:10	0.142	0.142	0.139	0.141	0.131	0.126	0.124	0.127	0.14	0.136	0.139	0.138
1:15:19	0.333	0.294	0.37	0.297	0.294	0.299	0.256	0.272	0.315	0.285	0.266	0.377		1:29:10	0.149	0.149	0.145	0.144	0.133	0.128	0.127	0.131	0.143	0.144	0.145	0.144
1:30:19	0.382	0.328	0.436	0.344	0.342	0.343	0.274	0.301	0.365	0.306	0.29	0.437		1:44:10	0.156	0.157	0.151	0.149	0.135	0.13	0.13	0.134	0.147	0.149	0.152	0.15
1:45:19	0.424	0.363	0.511	0.401	0.398	0.394	0.292	0.333	0.415	0.332	0.318	0.511		1:59:10	0.163	0.164	0.158	0.152	0.136	0.131	0.133	0.137	0.151	0.156	0.16	0.157
2:00:19	0.471	0.407	0.594	0.461	0.459	0.459	0.316	0.37	0.455	0.361	0.351	0.594		2:14:10	0.168	0.172	0.164	0.152	0.139	0.133	0.135	0.14	0.155	0.162	0.167	0.165
2:15:19	0.521	0.453	0.668	0.518	0.517	0.514	0.337	0.401	0.485	0.394	0.386	0.683		2:29:10	0.18	0.18	0.171	0.155	0.141	0.135	0.138	0.142	0.159	0.17	0.176	0.172
2:30:19	0.566	0.5	0.726	0.569	0.566	0.568	0.362	0.428	0.504	0.428	0.421	0.777		2:44:10	0.185	0.188	0.177	0.159	0.143	0.137	0.14	0.145	0.162	0.178	0.184	0.181
2:45:19	0.614	0.549	0.775	0.603	0.601	0.603	0.39	0.459	0.516	0.472	0.457	0.862		2:59:10	0.192	0.197	0.189	0.162	0.145	0.139	0.144	0.148	0.165	0.186	0.194	0.191
3:00:19	0.659	0.599	0.833	0.645	0.643	0.644	0.416	0.48	0.521	0.511	0.491	0.931		3:14:10	0.201	0.205	0.192	0.163	0.147	0.141	0.148	0.15	0.169	0.194	0.203	0.201
3:15:19	0.708	0.649	0.878	0.677	0.676	0.676	0.447	0.502	0.533	0.55	0.531	0.988		3:29:10	0.21	0.213	0.203	0.165	0.149	0.142	0.146	0.152	0.173	0.204	0.213	0.21
3:30:19	0.756	0.697	0.943	0.702	0.7	0.691	0.481	0.526	0.532	0.593	0.574	1.053		3:44:10	0.219	0.22	0.206	0.168	0.151	0.144	0.149	0.154	0.172	0.21	0.223	0.22
3:45:19	0.804	0.747	0.995	0.705	0.702	0.703	0.516	0.55	0.553	0.634	0.619	1.106		3:59:10	0.225	0.228	0.216	0.173	0.152	0.146	0.153	0.155	0.175	0.219	0.233	0.23
4:00:19	0.853	0.797	1.035	0.74	0.751	0.749	0.55	0.57	0.547	0.682	0.662	1.088		4:14:10	0.233	0.237	0.221	0.173	0.154	0.148	0.154	0.157	0.175	0.226	0.241	0.239
4:15:19	0.898	0.846	1.065	0.751	0.751	0.75	0.586	0.594	0.548	0.725	0.709	1.084		4:29:10	0.244	0.247	0.231	0.175	0.155	0.149	0.152	0.158	0.184	0.239	0.251	0.249
4:30:19	0.946	0.897	1.089	0.79	0.784	0.786	0.628	0.618	0.556	0.773	0.757	1.085		4:44:10	0.267	0.256	0.241	0.177	0.157	0.151	0.158	0.159	0.178	0.246	0.26	0.26
4:45:19	0.993	0.944	1.135	0.812	0.811	0.8	0.666	0.643	0.556	0.815	0.801	1.102		4:59:10	0.281	0.281	0.25	0.179	0.158	0.152	0.155	0.16	0.18	0.253	0.27	0.267
5:00:19	1.035	0.988	1.169	0.838	0.834	0.832	0.704	0.673	0.569	0.858	0.846	1.115		5:14:10	0.27	0.273	0.25	0.18	0.16	0.153	0.154	0.161	0.187	0.26	0.282	0.274
5:15:19	1.085	1.035	1.22	0.861	0.858	0.856	0.745	0.702	0.57	0.908	0.892	1.132		5:29:10	0.28	0.282	0.264	0.184	0.161	0.155	0.155	0.162	0.187	0.271	0.291	0.284
5:30:19	1.124	1.077	1.256	0.9	0.89	0.878	0.786	0.729	0.577	0.955	0.94	1.177		5:44:10	0.282	0.274	0.257	0.184	0.162	0.156	0.157	0.163	0.183	0.269	0.292	0.293
5:45:19	1.165	1.12	1.308	0.912	0.903	0.901	0.827	0.76	0.585	0.997	0.983	1.204		5:59:10	0.316	0.287	0.272	0.185	0.163	0.157	0.158	0.163	0.184	0.284	0.314	0.306
6:00:19	1.204	1.161	1.345	0.941	0.93	0.933	0.867	0.794	0.597	1.041	1.031	1.24		6:14:10	0.361	0.333	0.279	0.188	0.165	0.158	0.156	0.164	0.186	0.292	0.31	0.306
6:15:19	1.24	1.198	1.375	0.964	0.945	0.952	0.904	0.826	0.606	1.083	1.069	1.27		6:29:10	0.358	0.306	0.277	0.19	0.166	0.16	0.158	0.164	0.186	0.295	0.323	0.316
6:30:19	1.272	1.233	1.396	0.992	0.983	0.986	0.942	0.86	0.603	1.126	1.116	1.304		6:44:10	0.335	0.355	0.291	0.191	0.167	0.161	0.163	0.165	0.187	0.3	0.33	0.325
6:45:19	1.302	1.267	1.424	1.019	1.01	1.003	0.977	0.895	0.608	1.163	1.16	1.335		6:59:10	0.379	0.357	0.305	0.193	0.169	0.163	0.16	0.166	0.187	0.31	0.34	0.33
7:00:19	1.328	1.297	1.444	1.041	1.038	1.036	1.012	0.931	0.615	1.198	1.196	1.362		7:14:10	0.405	0.372	0.316	0.196	0.17	0.164	0.16	0.167	0.189	0.325	0.342	0.34
7:15:19	1.353	1.326	1.463	1.067	1.064	1.061	1.045	0.965	0.624	1.232	1.229	1.385		7:29:10	0.42	0.358	0.323	0.198	0.172	0.166	0.164	0.167	0.192	0.336	0.35	0.354
7:30:19	1.376	1.35	1.479	1.087	1.078	1.074	1.079	0.998	0.63	1.262	1.256	1.406		7:44:10	0.4	0.336	0.309	0.2	0.173	0.167	0.16	0.168	0.191	0.323	0.375	0.347
7:45:19	1.399	1.374	1.5	1.112	1.104	1.107	1.111	1.034	0.638	1.296	1.288	1.427		7:59:10	0.419	0.385	0.31	0.203	0.175	0.169	0.16	0.169	0.192	0.332	0.373	0.353
8:00:19	1.419	1.395	1.517	1.135	1.132	1.134	1.139	1.06	0.65	1.323	1.317	1.446		8:14:10	0.466	0.421	0.351	0.211	0.177	0.171	0.16	0.169	0.193	0.359	0.369	0.378
8:15:19	1.437	1.416	1.532	1.159	1.15	1.154	1.168	1.086	0.666	1.347	1.342	1.466		8:29:10	0.477	0.418	0.347	0.212	0.18	0.173	0.163	0.17	0.195	0.355	0.392	0.371
8:30:19	1.454	1.437	1.545	1.179	1.168	1.172	1.194	1.116	0.679	1.367	1.368	1.486		8:44:10	0.494	0.379	0.372	0.214	0.182	0.175	0.167	0.171	0.196	0.407	0.387	0.401
8:45:19	1.475	1.457	1.56	1.2	1.195	1.212	1.219	1.149	0.694	1.388	1.39	1.504		8:59:10	0.547	0.444	0.358	0.216	0.184	0.178	0.164	0.171	0.197	0.372	0.408	0.405
9:00:19	1.49	1.474	1.576	1.221	1.203	1.209	1.241	1.179	0.711	1.406	1.414	1.516		9:14:10	0.521	0.438	0.384	0.22	0.187	0.181	0.165	0.172	0.199	0.385	0.422	0.401
9:15:19	1.504	1.492	1.584	1.248	1.237	1.242	1.263	1.204	0.73	1.422	1.433	1.529		9:29:10	0.577	0.419	0.405	0.224	0.19	0.184	0.17	0.173	0.2	0.414	0.416	0.418
9:30:19	1.522	1.51	1.595	1.272	1.265	1.269	1.282	1.234	0.754	1.44	1.478	1.541		9:44:10	0.533	0.511	0.414	0.229	0.193	0.187	0.163	0.174	0.202	0.421	0.434	0.419
9:45:19	1.534	1.526	1.605	1.3	1.285	1.289	1.3	1.26	0.795	1.452	1.494	1.557		9:59:10	0.544	0.528	0.415	0.235	0.197	0.192	0.172	0.174	0.204	0.428	0.446	0.441
10:00:19	1.546	1.541	1.613	1.324	1.313	1.314	1.307	1.262	0.822	1.466	1.512	1.57		10:14:10	0.526	0.537	0.461	0.24	0.201	0.195	0.169	0.175	0.204	0.449	0.457	0.448
10:15:19	1.565	1.554	1.629	1.353	1.35	1.347	1.324	1.285	0.855	1.486	1.529	1.585		10:29:10	0.605	0.535	0.476	0.248	0.205	0.2	0.165	0.176	0.206	0.455	0.46	0.457
10:30:19	1.578	1.569	1.639	1.377	1.374	1.371	1.339	1.299	0.907	1.5	1.553	1.597		10:44:10	0.613	0.611	0.459	0.254	0.209	0.204	0.166	0.177	0.208	0.459	0.509	0.47
10:45:19	1.589	1.58	1.646	1.404	1.395	1.402	1.352	1.312	0.939	1.515	1.559	1.607		10:59:10	0.651	0.612	0.498	0.259	0.214	0.208	0.175	0.178	0.209	0.468	0.499	0.463
11:00:19	1.6	1.59	1.655	1.427	1.42	1.428	1.371	1.331	0.988	1.528	1.565	1.619		11:14:10	0.622	0.635	0.504	0.269	0.219	0.214	0.172	0.179	0.212	0.491	0.501	0.496
11:15:19	1.613	1.601	1.664	1.447	1.443	1.445	1.381	1.333	1.05	1.546	1.571	1.632		11:29:10	0.672	0.658	0.544	0.276	0.225	0.219	0.179	0.18	0.214	0.502	0.516	0.505
11:30:19	1.623	1.613	1.673	1.465	1.457	1.462	1.403	1.332	1.1	1.562	1.587	1.638		11:44:10	0.63	0.661	0.558	0.282	0.231	0.225	0.175	0.181	0.216	0.511	0.523	0.505
11:45:19	1.632	1.623	1.679	1.48	1.468	1.473	1.417	1.312	1.144	1.574	1.593	1.65		11:59:10	0.636	0.648	0.552	0.295	0.236	0.232	0.179	0.182	0.219	0.522	0.525	0.517
12:00:19	1.639	1.633	1.687	1.493	1.484	1.483	1.426	1.304	1.186	1.589	1.604	1.664		12:14:10	0.711	0.708	0.555	0.306	0.243	0.242	0.179	0.183	0.221	0.54	0.55	0.521
12:15:19	1.648	1.641	1.692	1.501	1.493	1.498	1.441	1.367	1.225	1.601	1.609	1.672		12:29:10	0.711	0.715	0.602	0.31	0.248	0.248	0.18	0.184	0.223	0.549	0.559	0.54
12:30:19	1.657	1.648	1.699	1.512	1.511	1.506	1.454	1.429	1.258	1.61	1.618	1.677		12:44:10	0.733	0.728	0.629	0.322	0.256	0.26	0.179	0.186	0.226	0.571	0.592	0.55
12:45:19	1.662	1.653	1.709	1.513	1.511	1.509	1.466	1.423	1.285	1.619	1.621	1.684		12:59:10	0.72	0.699	0.657	0.333	0.262	0.269	0.18	0.187	0.229	0.599	0.6	0.568
13:00:19	1.666	1.661	1.716	1.519	1.514	1.517	1.473	1.495	1.313	1.626	1.623	1.695		13:14:10	0.758	0.746	0.669	0.342	0.268	0.278	0.18	0.188	0.231	0.6	0.596	0.57
13:15:19	1.67	1.666	1.722	1.523	1.522	1.52	1.485	1.499	1.333	1.63	1.629	1.697		13:29:10	0.73	0.751	0.67	0.348	0.27	0.284	0.189	0.19	0.234	0.613	0.607	0.582
13:30:19	1.674	1.671	1.725	1.527	1.527	1.523	1.49	1.444	1.349	1.634	1.631	1.702		13:44:10	0.742	0.761	0.704	0.356	0.28	0.299	0.189	0.192	0.238	0.643	0.62	0.626
13:45:19	1.677	1.672	1.729	1.524	1.524	1.522	1.495	1.464	1.367	1.639	1.636	1.705		13:59:10	0.762	0.774	0.718	0.372	0.285	0.308	0.181	0.194	0.242	0.638	0.627	0.609
14:00:19	1.678	1.681	1.734	1.529	1.526	1.525	1.498	1.494	1.369	1.643	1.636	1.708		14:14:10	0.753	0.806	0.735	0.37	0.288	0.321	0.192	0.196	0.245	0.652	0.64	0.616
14:15:19	1.677	1.682	1.739	1.529	1.527	1.526	1.504	1.533	1.377	1.642	1.639	1.713		14:29:10	0.779	0.81	0.756	0.386	0.293	0.33	0.183	0.199	0.248	0.662	0.662	0.64
14:30:19	1.677	1.684	1.745	1.531	1.529	1.53	1.51	1.545	1.382	1.645	1.638	1.716		14:44:10	0.796	0.796	0.755	0.396	0.305	0.347	0.195	0.201	0.26	0.668	0.658	0.631
14:45:19	1.678	1.686	1.746	1.53	1.532	1.531	1.516	1.514	1.39	1.646	1.644	1.72		14:59:10	0.817	0.825	0.775	0.402	0.302	0.353	0.187	0.204	0.256	0.694	0.681	0.669
15:00:19	1.677	1.687	1.75	1.534	1.532	1.53	1.517	1.462	1.393	1.647	1.644	1.725		15:14:10	0.813	0.847	0.798	0.42	0.31	0.372	0.198	0.207	0.265	0.702	0.691	0.679
15:15:19	1.676	1.688	1.752	1.532	1.532	1.534	1.519	1.469	1.397	1.648	1.646	1.725		15:29:10	0.812	0.841	0.802	0.433	0.314	0.377	0.189	0.209	0.269	0.7	0.698	0.674
15:30:19	1.676	1.688	1.753	1.536	1.533	1.535	1.521	1.534	1.4	1.648	1.648	1.729		15:44:10	0.827	0.86	0.817	0.439	0.327	0.391	0.191	0.213	0.279	0.721	0.696	0.686
15:45:19	1.676	1.691	1.756	1.533	1.534	1.541	1.524	1.55	1.402	1.65	1.65	1.731		15:59:10	0.837	0.867	0.828	0.454	0.324	0.396	0.193	0.216	0.292	0.73	0.714	0.708
16:00:19	1.675	1.692	1.758	1.538	1.535	1.541	1.526	1.513	1.405	1.647	1.65	1.734		16:14:10	0.863	0.874	0.835	0.449	0.336	0.408	0.198	0.223	0.307	0.742	0.719	0.722
16:15:19	1.674	1.692	1.76	1.538	1.537	1.542	1.532	1.527	1.408	1.648	1.651	1.737		16:29:10	0.86	0.88	0.858	0.459	0.34	0.415	0.2	0.225	0.305	0.747	0.739	0.737
16:30:19	1.673	1.691	1.762	1.538	1.535	1.54	1.536	1.583	1.411	1.647	1.651	1.738		16:44:10	0.871	0.884	0.852	0.48	0.348	0.426	0.201	0.23	0.313	0.757	0.725	0.731
16:45:19	1.674	1.692	1.764	1.538	1.536	1.541	1.537	1.576	1.413	1.647	1.652	1.738		16:59:10	0.881	0.896	0.876	0.484	0.349	0.451	0.209	0.233	0.314	0.765	0.753	0.749
17:00:19	1.675	1.692	1.763	1.541	1.539	1.542	1.541	1.516	1.415	1.647	1.653	1.74		17:14:10	0.888	0.901	0.888	0.492	0.361	0.456	0.207	0.242	0.319	0.775	0.76	0.764
17:15:19	1.673	1.691	1.766	1.54	1.539	1.543	1.542	1.477	1.416	1.644	1.653	1.742		17:29:10	0.9	0.908	0.898	0.498	0.362	0.465	0.216	0.245	0.332	0.78	0.774	0.772
17:30:19	1.674	1.692	1.767	1.542	1.54	1.542	1.546	1.476	1.418	1.646	1.654	1.742		17:44:10	0.896	0.918	0.91	0.497	0.369	0.47	0.214	0.248	0.322	0.787	0.787	0.792
17:45:19	1.675	1.692	1.768	1.542	1.541	1.544	1.55	1.494	1.42	1.644	1.653	1.743		17:59:10	0.915	0.922	0.91	0.511	0.377	0.481	0.222	0.256	0.337	0.792	0.781	0.79
18:00:19	1.672	1.691	1.768	1.541	1.542	1.544	1.55	1.533	1.421	1.645	1.654	1.747		18:14:10	0.906	0.923	0.928	0.535	0.382	0.492	0.222	0.266	0.331	0.796	0.79	0.785
18:15:19	1.676	1.69	1.768	1.544	1.543	1.541	1.553	1.547	1.423	1.642	1.653	1.745		18:29:10	0.918	0.933	0.91	0.536	0.386	0.497	0.225	0.268	0.337	0.799	0.8	0.803
18:30:19	1.672	1.69	1.77	1.542	1.541	1.543	1.557	1.514	1.426	1.645	1.653	1.744		18:44:10	0.933	0.939	0.92	0.553	0.393	0.506	0.23	0.274	0.346	0.807	0.806	0.81
18:45:19	1.671	1.69	1.774	1.546	1.544	1.545	1.56	1.456	1.428	1.641	1.655	1.745		18:59:10	0.917	0.948	0.94	0.549	0.403	0.513	0.233	0.276	0.344	0.816	0.811	0.813
19:00:19	1.671	1.69	1.772	1.543	1.542	1.542	1.561	1.463	1.431	1.644	1.654	1.746		19:14:10	0.928	0.952	0.949	0.56	0.406	0.517	0.242	0.279	0.349	0.82	0.817	0.821
19:15:19	1.67	1.688	1.773	1.548	1.545	1.545	1.564	1.532	1.431	1.658	1.654	1.746		19:29:10	0.952	0.964	0.938	0.559	0.407	0.525	0.241	0.275	0.355	0.823	0.821	0.822
19:30:19	1.667	1.688	1.772	1.546	1.544	1.546	1.563	1.551	1.432	1.639	1.653	1.745		19:44:10	0.957	0.964	0.948	0.557	0.415	0.529	0.246	0.286	0.359	0.83	0.823	0.823
19:45:19	1.668	1.688	1.772	1.547	1.545	1.546	1.564	1.516	1.433	1.64	1.654	1.744		19:59:10	0.939	0.974	0.949	0.566	0.423	0.534	0.248	0.282	0.362	0.834	0.828	0.834
20:00:19	1.667	1.687	1.773	1.549	1.551	1.548	1.564	1.515	1.434	1.64	1.654	1.743		20:14:10	0.966	0.976	0.955	0.571	0.428	0.54	0.25	0.288	0.37	0.846	0.842	0.838
20:15:19	1.667	1.687	1.772	1.549	1.552	1.55	1.567	1.554	1.435	1.644	1.654	1.741		20:29:10	0.962	0.987	0.967	0.577	0.442	0.545	0.252	0.292	0.369	0.851	0.849	0.841
20:30:19	1.667	1.687	1.772	1.551	1.549	1.552	1.567	1.597	1.437	1.622	1.654	1.742		20:44:10	0.974	0.994	0.997	0.575	0.448	0.547	0.259	0.296	0.374	0.854	0.853	0.845
20:45:19	1.667	1.687	1.772	1.55	1.553	1.555	1.569	1.571	1.438	1.627	1.655	1.74		20:59:10	0.992	0.994	0.977	0.576	0.449	0.548	0.265	0.294	0.377	0.853	0.825	0.833
21:00:19	1.664	1.686	1.771	1.555	1.554	1.552	1.569	1.505	1.438	1.63	1.654	1.74		21:14:10	0.991	1.006	0.991	0.586	0.458	0.554	0.268	0.304	0.381	0.87	0.865	0.856
21:15:19	1.665	1.686	1.771	1.554	1.551	1.55	1.569	1.473	1.44	1.632	1.654	1.739		21:29:10	1.007	1.007	0.997	0.593	0.469	0.558	0.263	0.298	0.383	0.875	0.859	0.856
21:30:19	1.664	1.686	1.77	1.558	1.553	1.555	1.57	1.468	1.439	1.632	1.654	1.74		21:44:10	1.013	1.008	1.013	0.607	0.486	0.562	0.264	0.301	0.387	0.879	0.851	0.855
21:45:19	1.664	1.685	1.771	1.558	1.554	1.554	1.572	1.468	1.442	1.635	1.655	1.739		21:59:10	1.013	1.017	1.02	0.606	0.48	0.565	0.267	0.308	0.389	0.885	0.876	0.866
22:00:19	1.664	1.685	1.77	1.56	1.557	1.58	1.571	1.482	1.444	1.664	1.654	1.737		22:14:10	1.019	1.024	1.032	0.61	0.501	0.569	0.269	0.309	0.392	0.881	0.877	0.872
22:15:19	1.665	1.685	1.768	1.561	1.57	1.567	1.572	1.516	1.445	1.659	1.655	1.738		22:29:10	1.026	1.023	1.024	0.627	0.509	0.568	0.271	0.305	0.417	0.881	0.87	0.868
22:30:19	1.664	1.685	1.768	1.562	1.564	1.572	1.572	1.537	1.446	1.649	1.655	1.739		22:44:10	1.026	1.031	1.035	0.615	0.514	0.569	0.274	0.316	0.402	0.889	0.896	0.878
22:45:19	1.665	1.683	1.768	1.561	1.56	1.571	1.572	1.547	1.447	1.625	1.655	1.737		22:59:10	1.037	1.042	1.036	0.624	0.541	0.571	0.276	0.312	0.415	0.892	0.883	0.878
23:00:19	1.664	1.684	1.769	1.565	1.567	1.568	1.573	1.529	1.45	1.613	1.656	1.736		23:14:10	1.065	1.039	1.046	0.625	0.545	0.559	0.282	0.311	0.404	0.9	0.901	0.882
23:15:19	1.663	1.682	1.767	1.565	1.563	1.57	1.572	1.49	1.452	1.609	1.655	1.733		23:29:10	1.056	1.044	1.059	0.628	0.55	0.563	0.28	0.32	0.407	0.916	0.906	0.89
23:30:19	1.664	1.683	1.766	1.568	1.564	1.562	1.573	1.444	1.454	1.603	1.655	1.734		23:44:10	1.057	1.052	1.059	0.633	0.574	0.559	0.281	0.315	0.412	0.909	0.897	0.89
23:45:19	1.662	1.683	1.766	1.57	1.568	1.572	1.574	1.429	1.456	1.598	1.657	1.734		23:59:10	1.069	1.062	1.067	0.643	0.595	0.559	0.289	0.319	0.412	0.922	0.903	0.893
24:00:19	1.663	1.683	1.764	1.571	1.569	1.572	1.574	1.433	1.458	1.595	1.656	1.733		24:14:10	1.079	1.058	1.066	0.647	0.61	0.555	0.283	0.316	0.414	0.92	0.895	0.887
														24:29:10	1.077	1.062	1.076	0.648	0.64	0.566	0.287	0.314	0.414	0.929	0.906	0.896
														24:44:10	1.079	1.072	1.084	0.651	0.657	0.576	0.289	0.316	0.413	0.936	0.921	0.908
														24:59:10	1.096	1.071	1.083	0.65	0.664	0.577	0.295	0.322	0.419	0.923	0.885	0.873
														25:14:10	1.115	1.076	1.088	0.667	0.666	0.582	0.296	0.319	0.419	0.936	0.913	0.903
														25:29:10	1.107	1.074	1.087	0.689	0.654	0.583	0.3	0.323	0.427	0.931	0.888	0.895
														25:44:10	1.103	1.082	1.091	0.672	0.673	0.59	0.295	0.315	0.418	0.939	0.905	0.909
														25:59:10	1.111	1.082	1.097	0.685	0.671	0.591	0.295	0.315	0.422	0.947	0.932	0.913
														26:14:10	1.132	1.09	1.1	0.675	0.656	0.595	0.297	0.318	0.428	0.948	0.923	0.913
														26:29:10	1.126	1.088	1.099	0.685	0.668	0.595	0.298	0.321	0.434	0.951	0.926	0.921
														26:44:10	1.134	1.101	1.104	0.718	0.676	0.601	0.3	0.322	0.451	0.952	0.911	0.89
														26:59:10	1.122	1.095	1.107	0.713	0.688	0.608	0.305	0.326	0.456	0.952	0.89	0.901
														27:14:10	1.153	1.105	1.108	0.701	0.693	0.612	0.306	0.33	0.447	0.944	0.897	0.875
														27:29:10	1.122	1.106	1.115	0.713	0.703	0.627	0.307	0.329	0.448	0.944	0.908	0.891
														27:44:10	1.135	1.114	1.124	0.727	0.722	0.615	0.309	0.335	0.449	0.952	0.902	0.899
														27:59:10	1.154	1.115	1.118	0.724	0.728	0.613	0.31	0.33	0.47	0.948	0.884	0.879
														28:14:10	1.161	1.117	1.126	0.704	0.712	0.594	0.323	0.333	0.46	0.937	0.893	0.901
														28:29:10	1.171	1.114	1.126	0.714	0.717	0.602	0.332	0.338	0.461	0.938	0.882	0.889
														28:44:10	1.149	1.123	1.133	0.724	0.726	0.598	0.321	0.344	0.458	0.945	0.904	0.896
														28:59:10	1.183	1.125	1.141	0.726	0.759	0.593	0.319	0.338	0.474	0.98	0.93	0.935
														29:14:10	1.176	1.123	1.129	0.724	0.763	0.597	0.32	0.351	0.48	0.953	0.886	0.879
														29:29:10	1.155	1.129	1.139	0.718	0.763	0.598	0.323	0.339	0.477	0.946	0.892	0.882
														29:44:10	1.177	1.135	1.145	0.726	0.763	0.602	0.32	0.339	0.493	0.954	0.916	0.914
														29:59:10	1.192	1.137	1.154	0.716	0.752	0.6	0.324	0.339	0.487	0.946	0.914	0.887
														30:14:10	1.2	1.142	1.16	0.736	0.736	0.605	0.328	0.347	0.501	0.954	0.915	0.9
														30:29:10	1.171	1.142	1.142	0.736	0.831	0.583	0.321	0.342	0.494	0.966	0.925	0.918
														30:44:10	1.197	1.143	1.154	0.741	0.805	0.577	0.322	0.352	0.507	0.965	0.928	0.913
														30:59:10	1.183	1.143	1.154	0.741	0.817	0.584	0.325	0.347	0.503	0.969	0.915	0.911
														31:14:10	1.206	1.145	1.159	0.766	0.78	0.585	0.33	0.344	0.486	0.978	0.938	0.923
														31:29:10	1.223	1.148	1.162	0.759	0.792	0.593	0.334	0.34	0.496	0.979	0.933	0.926
														31:44:10	1.223	1.158	1.158	0.763	0.799	0.592	0.337	0.354	0.503	0.987	0.926	0.929
														31:59:10	1.225	1.155	1.178	0.757	0.789	0.59	0.329	0.346	0.5	0.96	0.91	0.885
														32:14:10	1.231	1.162	1.18	0.75	0.805	0.596	0.328	0.343	0.489	0.985	0.925	0.901
														32:29:10	1.233	1.161	1.173	0.751	0.806	0.596	0.337	0.346	0.482	0.974	0.922	0.893
														32:44:10	1.235	1.161	1.175	0.748	0.788	0.602	0.332	0.349	0.505	0.971	0.893	0.883
														32:59:10	1.247	1.163	1.175	0.791	0.81	0.606	0.333	0.347	0.499	0.992	0.945	0.941
														33:14:10	1.234	1.169	1.196	0.781	0.805	0.612	0.331	0.36	0.513	0.996	0.924	0.917
														33:29:10	1.264	1.174	1.188	0.764	0.807	0.614	0.354	0.354	0.509	0.983	0.923	0.913
														33:44:10	1.212	1.175	1.198	0.783	0.813	0.614	0.337	0.356	0.501	0.984	0.952	0.928
														33:59:10	1.265	1.176	1.181	0.773	0.808	0.613	0.337	0.365	0.48	0.979	0.947	0.926
														34:14:10	1.211	1.175	1.203	0.762	0.811	0.619	0.341	0.356	0.494	0.991	0.941	0.927
														34:29:10	1.271	1.187	1.2	0.761	0.81	0.62	0.34	0.36	0.481	0.988	0.941	0.918
														34:44:10	1.271	1.19	1.212	0.809	0.81	0.623	0.35	0.354	0.453	0.991	0.937	0.939
														34:59:10	1.25	1.192	1.186	0.788	0.851	0.645	0.331	0.355	0.476	0.995	0.933	0.929
														35:14:10	1.26	1.186	1.2	0.793	0.847	0.637	0.329	0.352	0.479	0.991	0.922	0.931
														35:29:10	1.279	1.192	1.208	0.791	0.859	0.641	0.341	0.354	0.488	0.987	0.929	0.909
														35:44:10	1.25	1.199	1.209	0.797	0.841	0.637	0.337	0.354	0.481	1.014	0.95	0.926
														35:59:10	1.287	1.202	1.229	0.817	0.847	0.644	0.344	0.36	0.488	1.016	0.949	0.952
														36:14:10	1.288	1.2	1.209	0.806	0.852	0.645	0.355	0.359	0.49	1.004	0.932	0.937
														36:29:10	1.269	1.196	1.199	0.782	0.834	0.645	0.357	0.362	0.484	1.019	0.925	0.932
														36:44:10	1.29	1.209	1.213	0.819	0.844	0.658	0.364	0.364	0.489	1.027	0.977	0.974
														36:59:10	1.296	1.212	1.228	0.804	0.837	0.646	0.345	0.361	0.486	1.018	0.947	0.93
														37:14:10	1.291	1.209	1.236	0.802	0.841	0.648	0.362	0.367	0.489	1.018	0.933	0.915
														37:29:10	1.261	1.216	1.239	0.814	0.85	0.645	0.361	0.364	0.469	1.018	0.944	0.943
														37:44:10	1.265	1.213	1.235	0.797	0.858	0.649	0.347	0.371	0.481	1.036	0.951	0.945
														37:59:10	1.278	1.22	1.223	0.814	0.871	0.627	0.347	0.364	0.491	1.035	0.925	0.935
														38:14:10	1.3	1.222	1.246	0.799	0.857	0.624	0.354	0.372	0.479	1.026	0.937	0.915
														38:29:10	1.302	1.217	1.233	0.806	0.849	0.625	0.357	0.372	0.471	1.035	0.932	0.927
														38:44:10	1.279	1.228	1.235	0.808	0.839	0.601	0.364	0.375	0.492	1.033	0.95	0.933
														38:59:10	1.31	1.23	1.25	0.831	0.85	0.543	0.344	0.37	0.501	1.048	0.938	0.95
														39:14:10	1.305	1.222	1.234	0.819	0.858	0.538	0.345	0.376	0.463	1.035	0.941	0.925
														39:29:10	1.313	1.234	1.242	0.826	0.852	0.54	0.362	0.373	0.491	1.035	0.917	0.931
														39:44:10	1.306	1.236	1.268	0.822	0.856	0.55	0.37	0.371	0.498	1.045	0.927	0.92
														39:59:10	1.317	1.235	1.24	0.852	0.857	0.554	0.375	0.381	0.489	1.047	0.92	0.937
														40:14:10	1.297	1.231	1.24	0.817	0.861	0.563	0.38	0.376	0.492	1.036	0.918	0.923
														40:29:10	1.336	1.24	1.245	0.837	0.858	0.566	0.383	0.38	0.481	1.04	0.926	0.92
														40:44:10	1.272	1.237	1.277	0.855	0.874	0.594	0.374	0.373	0.478	1.046	0.922	0.924
														40:59:10	1.328	1.242	1.276	0.84	0.875	0.608	0.378	0.381	0.497	1.04	0.903	0.923
														41:14:10	1.336	1.245	1.254	0.836	0.877	0.62	0.394	0.378	0.489	1.051	0.921	0.917
														41:29:10	1.308	1.242	1.284	0.855	0.885	0.627	0.367	0.379	0.488	1.048	0.934	0.934
														41:44:10	1.317	1.25	1.278	0.838	0.878	0.628	0.378	0.38	0.462	1.045	0.92	0.918
														41:59:10	1.321	1.253	1.285	0.84	0.873	0.636	0.376	0.388	0.493	1.044	0.93	0.921
														42:14:10	1.375	1.247	1.283	0.839	0.877	0.642	0.377	0.398	0.473	1.06	0.936	0.919
														42:29:10	1.377	1.256	1.263	0.835	0.893	0.64	0.378	0.396	0.492	1.035	0.89	0.878
														42:44:10	1.31	1.251	1.274	0.865	0.889	0.647	0.395	0.413	0.49	1.041	0.905	0.904
														42:59:10	1.307	1.259	1.273	0.85	0.892	0.656	0.385	0.398	0.497	1.033	0.919	0.922
														43:14:10	1.347	1.262	1.3	0.848	0.899	0.679	0.385	0.392	0.491	1.027	0.902	0.906
														43:29:10	1.349	1.263	1.269	0.855	0.908	0.638	0.382	0.37	0.495	1.036	0.9	0.906
														43:44:10	1.329	1.258	1.279	0.878	0.915	0.619	0.377	0.359	0.512	1.03	0.897	0.88
														43:59:10	1.355	1.26	1.277	0.898	0.911	0.617	0.38	0.388	0.506	1.024	0.922	0.872
														44:14:10	1.36	1.27	1.282	0.897	0.909	0.624	0.392	0.381	0.507	1.014	0.912	0.887
														44:29:10	1.332	1.271	1.285	0.894	0.919	0.628	0.389	0.368	0.503	1.029	0.902	0.896
														44:44:10	1.361	1.27	1.311	0.875	0.924	0.626	0.383	0.373	0.503	1.022	0.892	0.902
														44:59:10	1.371	1.272	1.293	0.888	0.933	0.625	0.382	0.386	0.505	1.015	0.882	0.897
														45:14:10	1.355	1.278	1.295	0.889	0.938	0.628	0.382	0.395	0.507	1.02	0.89	0.891
														45:29:10	1.403	1.273	1.292	0.882	0.943	0.649	0.394	0.383	0.514	1.008	0.901	0.876
														45:44:10	1.351	1.279	1.304	0.877	0.951	0.676	0.372	0.394	0.515	1.006	0.891	0.87
														45:59:10	1.353	1.276	1.291	0.859	0.951	0.663	0.397	0.389	0.514	1.005	0.909	0.879
														46:14:10	1.398	1.288	1.28	0.84	0.962	0.635	0.396	0.392	0.503	1.009	0.902	0.871
														46:29:10	1.328	1.282	1.294	0.83	0.973	0.625	0.394	0.379	0.512	1.014	0.907	0.864
														46:44:10	1.372	1.273	1.288	0.812	0.972	0.621	0.412	0.378	0.505	1.001	0.921	0.864
														46:59:10	1.321	1.287	1.292	0.811	0.974	0.619	0.409	0.399	0.501	0.996	0.89	0.889
														47:14:10	1.337	1.291	1.313	0.805	0.981	0.62	0.412	0.409	0.51	1.014	0.903	0.871
														47:29:10	1.333	1.292	1.296	0.804	0.978	0.627	0.419	0.399	0.514	1.017	0.935	0.889
														47:44:10	1.323	1.284	1.289	0.802	0.984	0.635	0.435	0.423	0.515	1.004	0.885	0.866
														47:59:10	1.382	1.302	1.317	0.803	0.988	0.63	0.426	0.386	0.522	1.021	0.921	0.88
														48:14:10	1.36	1.291	1.296	0.787	0.992	0.631	0.433	0.4	0.52	1.012	0.929	0.896

## Sheet: Fig. S5
Fig.S5B
	WT			dal81Δ/Δ			stp2Δ/Δ
30 min	31	35	48	60	39	40	59	46	45
60 min	15	18	30	47	43	45	32	32	51
90 min	6	17	30	53	42	24	42	52	30
120 min	16	7	10	43	33	39	41	43	48
150 min	10	6	16	37	44	43	34	49	41

## Sheet: Fig.S7
Fig.S7C					Fig.S7D
WT	dal81Δ/Δ	stp2Δ/Δ	dal81Δ/Δstp2Δ/Δ		WT	dal81Δ/Δ	stp2Δ/Δ	dal81Δ/Δstp2Δ/Δ
49.886	20.8588	28.4915	14.4089		32.8982	12.9808	17.3745	15.5172
65.1028	21.0639	21.6164	13.3277		30.5822	17.3077	13.8996	7.75862
69.1967	23.3047	25.3462	13.6542		28.799	15.8654	22.0077	7.75862
58.4409	26.1869	26.4735	17.6444

[truncated: 3 more sheets: Fig. S9, Fig.S10, Fig.S14]
